# Supplementary material
Source: PubMed Central journal article supplement (PMC2739738)
Supplement: NIHMS115001-supplement-01.pdf [file NIHMS115001-supplement-01.pdf]

## **Supplemental Data**

### **Functional and Evolutionary Insights Into Human Brain Development Through Global Transcriptome Analysis**

**Matthew B. Johnson, Yuka Imamura Kawasawa, Christopher E. Mason, Željka Krsnik, Giovanni Coppola, Darko Bogdanović, Daniel H. Geschwind, Shrikant M. Mane, Matthew W. State, and Nenad Šestan**

#### **Supplemental Material:**

**Supplemental Figures**

**Supplemental Experimental Procedures**

**Supplemental References**

## Supplemental Figures

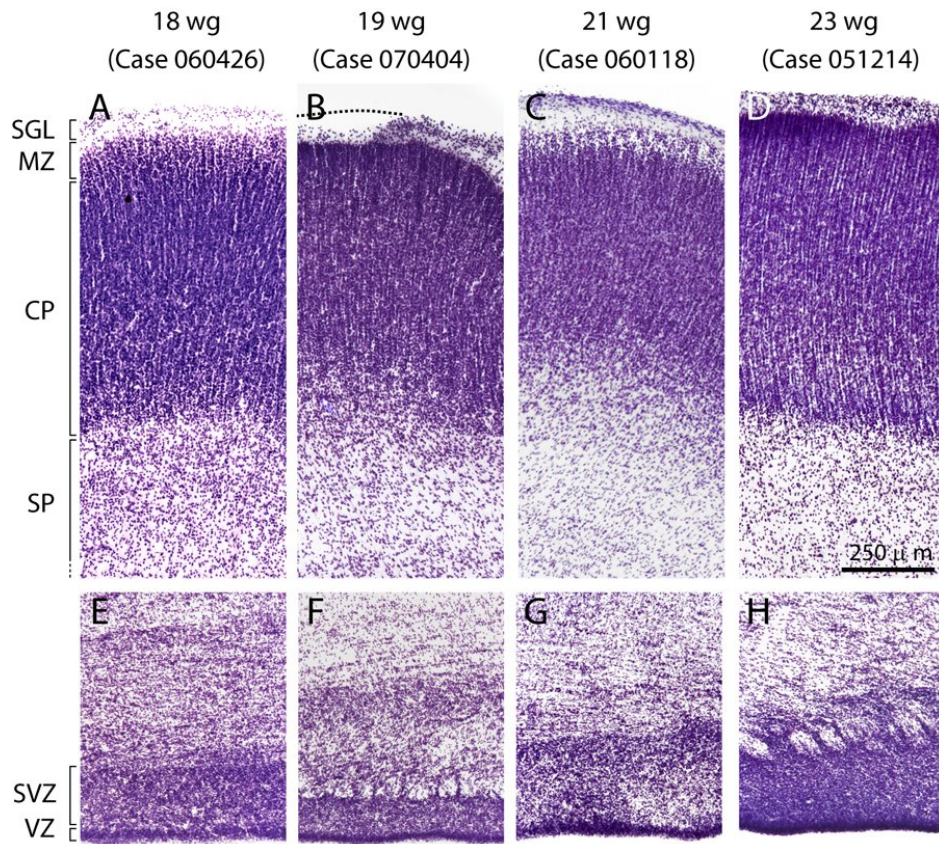

### Supplemental Figure 1. Normal Cytoarchitecture of Brain Specimens Used for Exon Array Analysis

Nissl staining of the tissue remaining after microdissection from all four brains used for microarray analysis, confirming normal cytoarchitecture and the absence of microscopic neuropathological defects such as periventricular lesions commonly present at this developmental stage. SGL, subpial granular layer; MZ, marginal zone; CP, cortical plate; SP, subplate; SVZ, subventricular zone; VZ, ventricular zone. Case numbers as in Table S1.

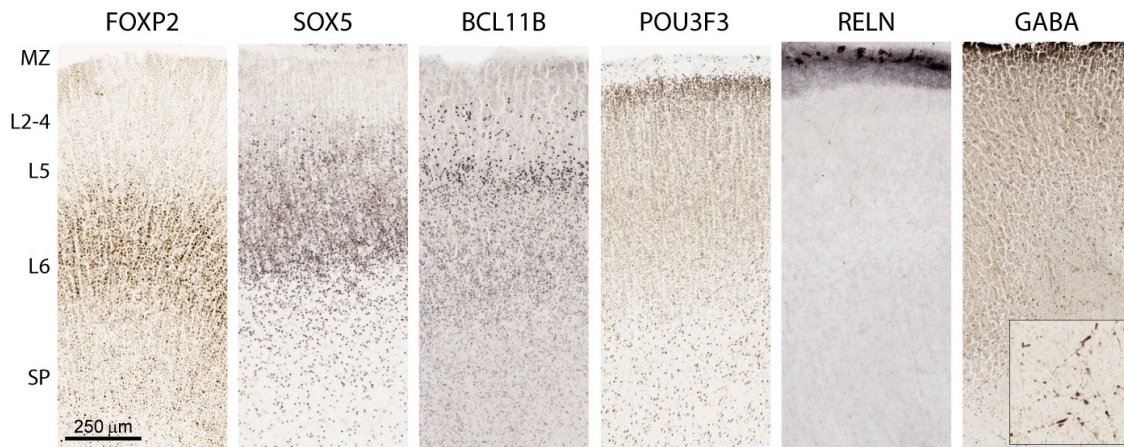

**Supplemental Figure 2. Normal Laminar Position of Cortical Neurons in Brain Specimens Used for Exon Array Analysis**

Various immunohistochemical markers were used to confirm the presence of all major neuronal and glial cell types present at this developmental age in all four brains. Shown here are selected examples of immunohistochemical staining for markers of layer selective of projection neurons (FOXP2, SOX5, BCL11B, and POU3F3), MZ Cajal-Retzius neurons (RELN) and interneurons (GABA) in the neocortex of the 19 wg brain (Case #070404). The normal laminar position of these neurons indicates absence of obvious defects in neuronal specification and migration.

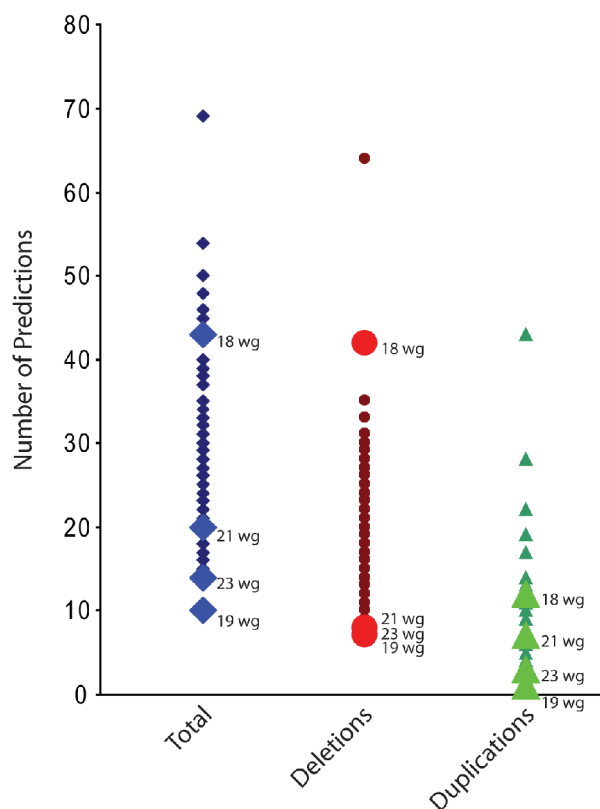

### Supplemental Figure 3. Predicted Rates of Copy Number Variation in Brain Specimens Used for Exon Array Analysis

Illumina genotyping microarray data were analyzed for putative copy number variations (CNVs) using the PennCNV algorithm (Wang et al., 2007). We found a total of 88 predicted CNVs, with a median 17 CNVs per individual (Table S2). To place these predictions in the context of expected human genetic variation, we used the same algorithm to analyze 120 well-characterized HapMap samples. We found that predicted CNV rates from our samples (large blue diamonds) fell within the range of expected CNVs per individual (small blue diamonds), and this remained true when predictions were partitioned into putative deletions (red circles) and duplications (green triangles). One brain (18 wg) displayed a higher rate of predicted deletions, but only one predicted duplication; this was likely an effect of a slightly lower call rate on this chip (95%), which may have been due to DNA sample degradation or technical error in the chip. All other call rates were above 99%. Finally, the majority (59%) of predicted CNVs in our samples overlapped known CNVs or segmental duplications, further indicating that these brains were within the normal range of human genetic variation.

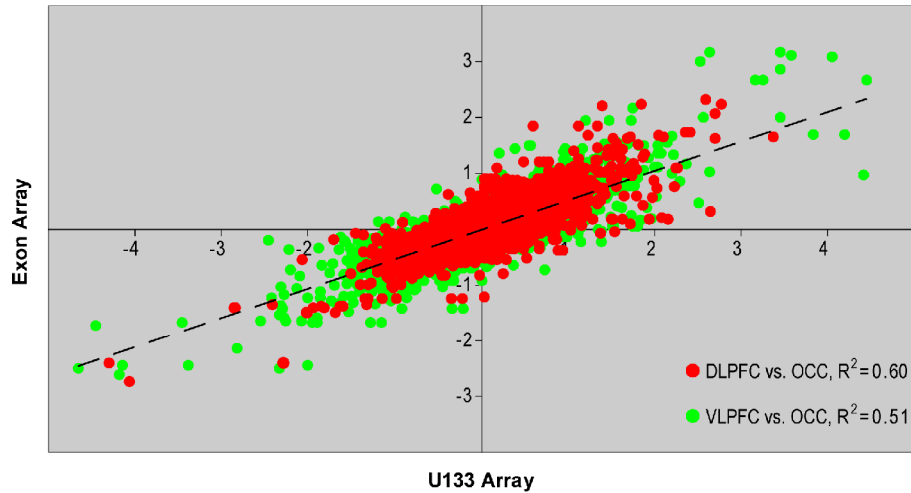

#### Supplemental Figure 4. Comparison of Exon 1.0 ST and U133 Plus 2 GeneChip Microarrays Using Human Fetal Brain Tissue

The Exon Array features more comprehensive coverage of the human genome than previous generations of arrays (e.g., 1.4 million probesets on the Exon Array, versus 54,000 probesets on the U133 Plus 2 array). However, because of its novelty, the Exon Array lacks a comparable accumulation of biological validation. Therefore, to compare the old 3'-biased array platform with the new exon-based design specifically in terms of detecting gene expression differences in fetal human brain, we hybridized selected samples to both Exon and U133 arrays and compared gene expression levels and log ratios between DLPFC, VLPFC, and OCC. These plots show signal log ratios for DLPFC (red) and VLPFC (green) versus OCC. The two platforms were well correlated in all comparisons ( $R^2 > 0.5$ ), providing us with confidence in making meaningful comparisons between Exon Array and extant U133 data from adult human brain, as well as from other tissues and species (see, e.g., Table S11). In addition to this analysis, other published studies using human adult brain and other non-neural tissues have since demonstrated the reliability of the Exon Array platform and its performance in comparison to the U133 Plus 2 Array (Abdueva et al., 2007; Kapur et al., 2007; Clark et al., 2007; Gardina et al., 2006).

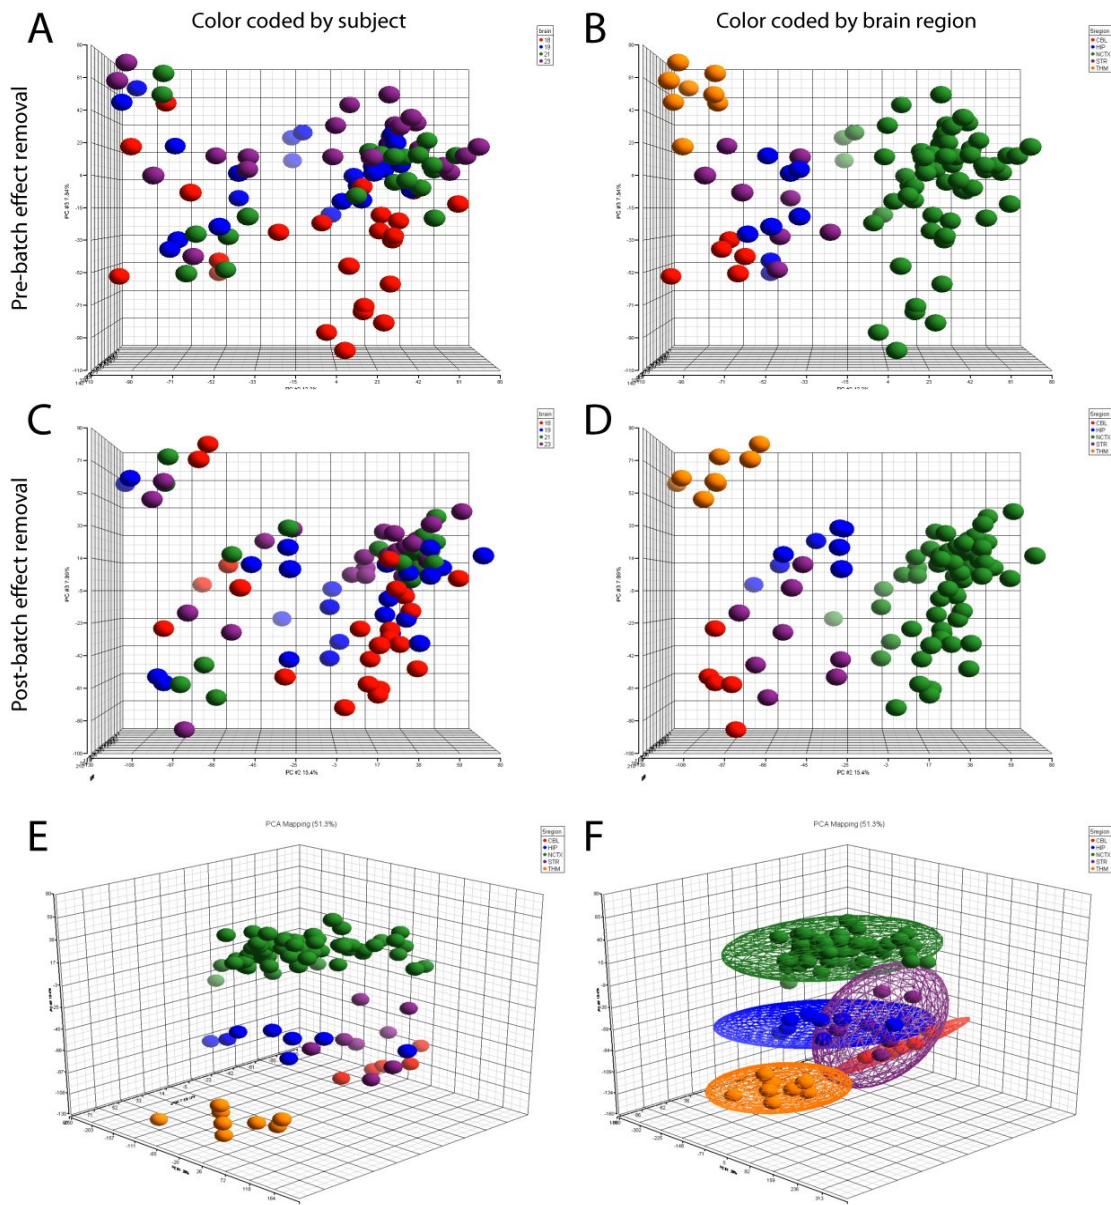

### Supplemental Figure 5. Principal Component Analysis of Exon Array Core Transcripts

We performed principal component analysis (PCA) of all core transcripts on the Exon Array to assess variability of the data across brain regions, individuals, and hybridizations. Batch effect removal was performed in Partek GS to remove effects of hybridization date or brain specimen (inter-individual variations). Following batch effect removal, separation between individuals was reduced (compare A and C), while separation between brain regions was improved, especially for subcortical areas (compare B and D). PCA confirmed that inter-individual differences had a smaller effect on gene expression data across all 17,000+ core transcripts than did variation between brain regions, especially between NCTX and sub-cortical areas (compare C and D). The same data in D is shown in E and F with axes rotated to better reveal the separation between brain regions. Finally, ellipses in F show that three NCTX samples lie more than three standard deviations from the cluster “center, suggesting potential outlier status. ANOVA analysis excluding these samples did not alter the results for the most significantly DEX genes. Notably, PCA of all core transcripts did not segregate NCTX areas, although some clustering of individuals was apparent, consistent with the observations of Khaitovich et al. (2004) that inter-individual gene expression differences outweighed inter-areal differences in adult human cortex.

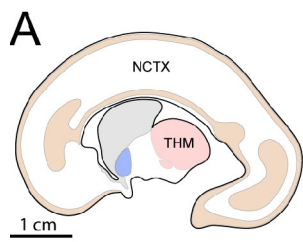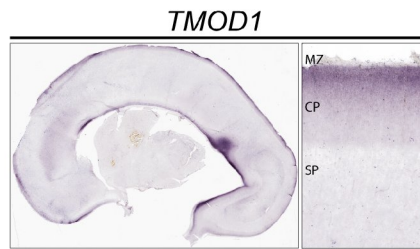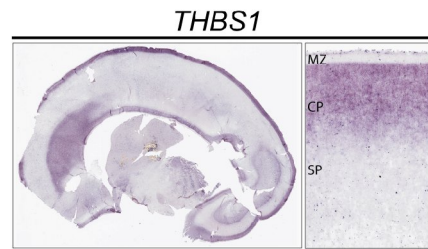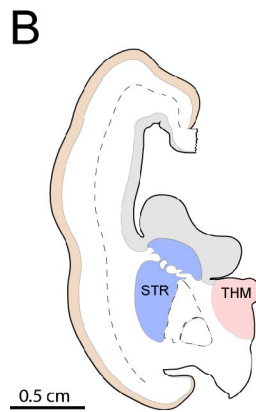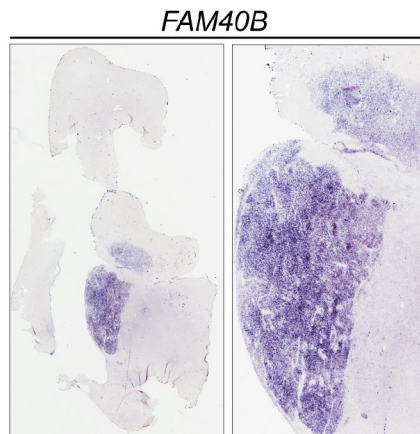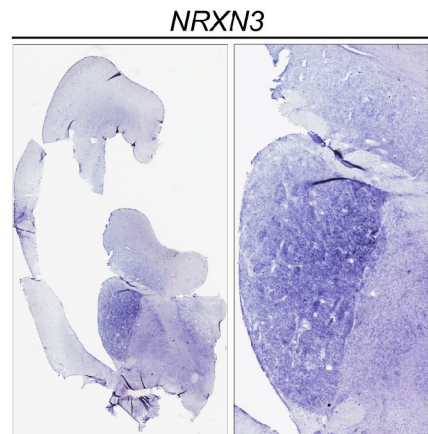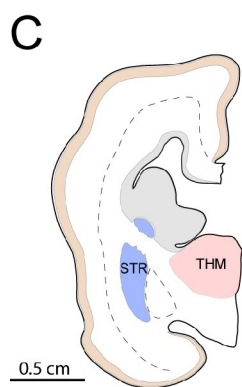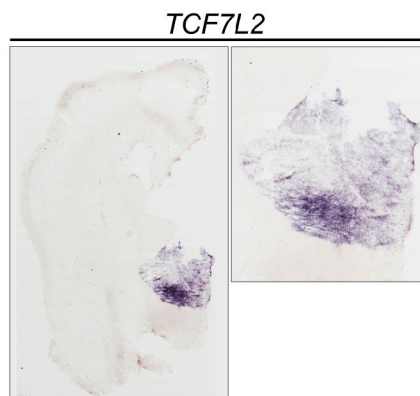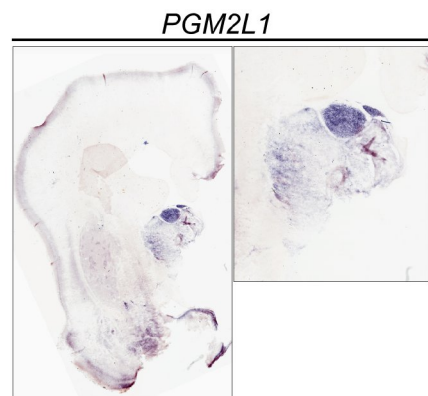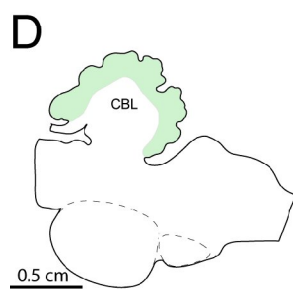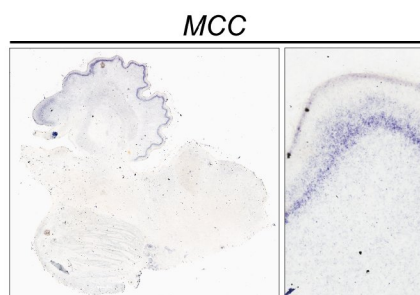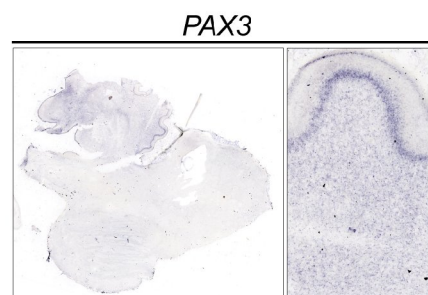

### Supplemental Figure 6. *In Situ* Hybridization of Selected Exon Array Candidate Genes

We selected candidate genes from the clusters shown in Figure 2 for further confirmation based on putative function, apparent divergence from expression in mouse, gene novelty, and maximum and fold-change expression levels. In the schematic illustrations at left, the cortical plate (CP) is shaded in beige, the caudate and putamen (STR) in blue, the thalamus (THM) in pink, and the cerebellar cortex (CBL) in green. The grey areas in (A-C) are the forebrain neurogenic regions, the cortical ventricular zone and the ganglionic eminence. (A) and (D) are sagittal sections through the forebrain and cerebellum/brainstem, respectively, while (B) and (C) are coronal sections through the forebrain, with (B) more rostral than (C). All sections are from late mid-fetal brain specimens (19 to 22 wg).

(A) *TMOD1* and *THBS1* were 6.8- and 7.5-fold enriched in NCTX by Exon Array analysis, respectively, and this specific enrichment was confirmed by qRT-PCR ( $p < 0.0005$ ). *In situ* hybridizations shown here indicate that *TMOD1* is specifically enriched in the upper CP, while *THBS1* is expressed throughout the CP, and neither gene is noticeably expressed in the STR or THM. *Tmod1* is an actin regulatory protein and a possible transcriptional target of the non-canonical Wnt pathway. Although it has been shown to be expressed in neurons in the adult mouse forebrain, its specific role in neuronal development or function remains unknown. *THBS1* is a member of a family of genes involved in synaptogenesis and plasticity, two others of which have been implicated in primate cortical evolution.

(B) *FAM40B* was one of the most enriched genes in STR (~24-fold), while *NRXN3* was also highly enriched in this structure (~4-fold). Both were confirmed by qRT-PCR as well as ISH, with the *in situ* shown here suggesting restricted expression in the putamen and caudate nucleus. *FAM40B* is a completely unknown transcript encoding a protein with multiple predicted transmembrane domains. According to the Allen Brain Atlas, its mouse homolog is enriched in the upper cortical pyramidal layers, CA fields of the hippocampus, the striatum, and the Purkinje cell layer of the cerebellum. *NRXN3* is one of the lesser known members of the neurexin-neurologin gene families involved in cell adhesion at the synapse. *NRXN3* polymorphisms have been linked to opioid and alcohol dependence in humans, and the mouse homolog has been shown to be upregulated in the striatum of animals developing cocaine addiction. *NRXN3* has also been shown to be alternatively spliced; our Exon Array and qRT-PCR data suggest that while the full-length isoform is enriched in STR, as shown here also by ISH, the truncated isoform (NM\_138970) is specifically enriched in THM relative to other brain regions (data not shown).

(C) *TCF7L2* was one of the most highly THM-enriched genes (>30-fold), consistent with a previous report of its significant enrichment in the macaque monkey thalamus (Murray et al., 2007). ISH shows this Wnt-pathway transcription factor to be specifically enriched in the ventrolateral thalamus. *PGM2L1* was ~4-fold enriched in THM by Exon Array analysis and confirmed by qRT-PCR. ISH shows specific enrichment in the dorsolateral nucleus. *PGM2L1* encodes an enzyme involved in glucose metabolism, and has not yet been studied in the context of the nervous system.

(D) *PAX3* and *MCC* (*mutated in colorectal cancer*) were 6.5- and 2.8-fold enriched in CBL by Exon Array analysis and were confirmed by qRT-PCR (Figure 2 and data not shown) and ISH.



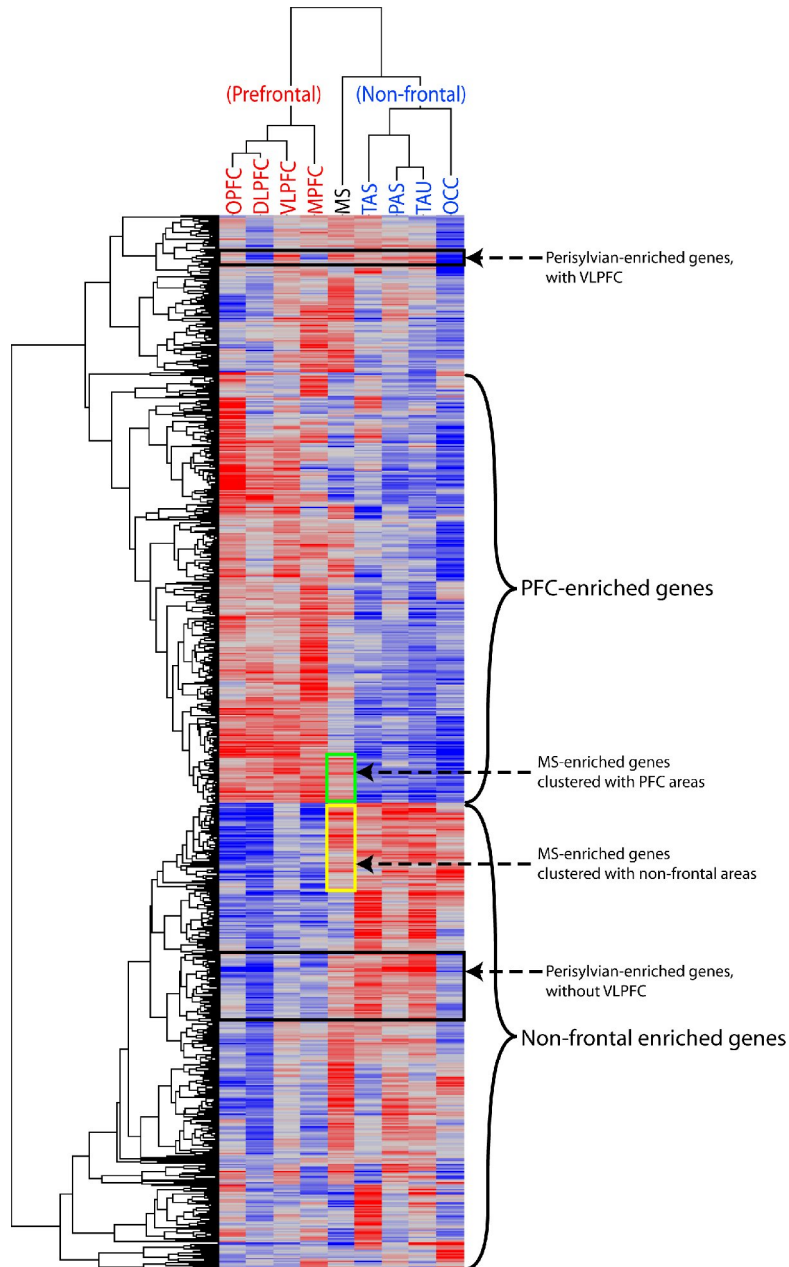

**Supplemental Figure 7. Differential Gene Expression in the Mid-Fetal Human Neocortex**

Unsupervised hierarchical cluster analysis of 1,753 genes differentially expressed (FDR<0.01) within the late mid-fetal human neocortex. Clustering of areas suggests a broad separation of PFC ( $r=0.37$ ) from non-frontal ( $r=0.25$ ) cortical areas. The most similar areas in this analysis were TAU+PAS ( $r=0.67$ ) followed by OPFC+DLPFC ( $r=0.57$ ). The MS sample, taken from the border area of the frontal and parietal lobes, does not correlate with either PFC or PAS; rather, genes enriched in MS are divided into those that cluster with PFC and those that cluster with non-PFC areas, reflecting the mixed frontoparietal nature of the sample. These results prompted us to perform the additional, targeted analyses shown in the main Figure 3. Red is higher expression, blue is lower expression, with genes individually median-centered at grey.

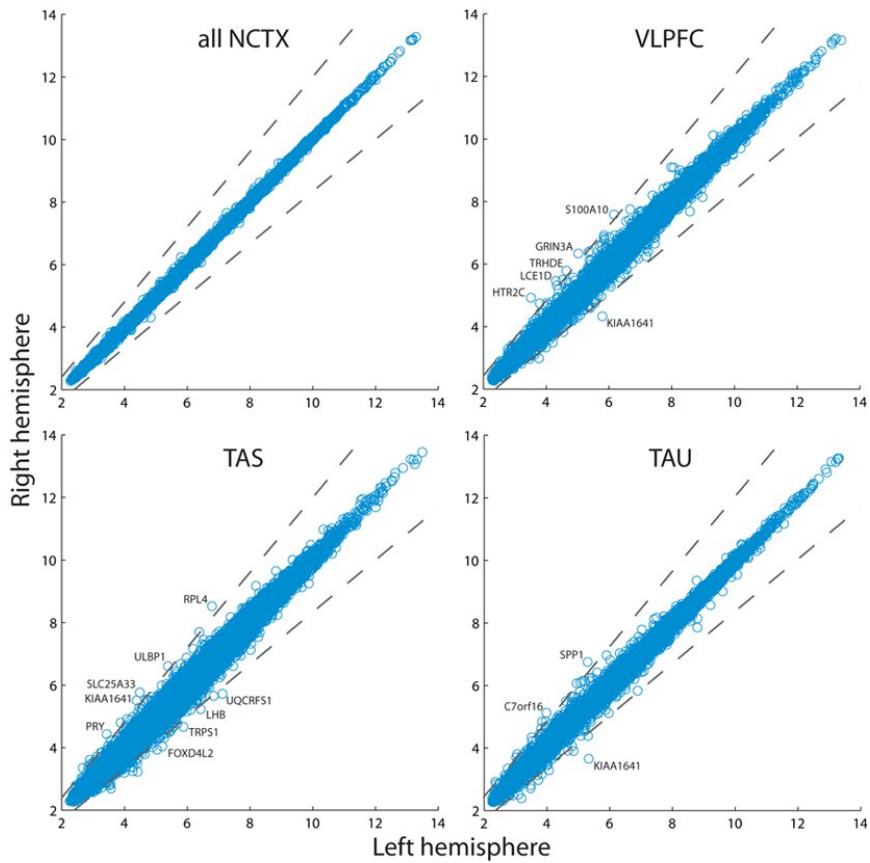

**Supplemental Figure 8. Large-Scale Left-Right Symmetry of Gene Expression in the Mid-Fetal Human Neocortex**

Scatter-plots of expression data from left and right hemispheres across all NCTX, and perisylvian areas involved in speech and language processing, VLPFC, TAU, and TAS. In both global ANOVAs and paired t-tests of all individual areas, no genes were significantly different after correction for multiple comparisons. Gray dashed lines indicate a 1.2-fold difference. The genes indicated by name with greater than 1.2 fold differences between left and right have uncorrected p-values ranging from 0.02 (*C7orf16*) to 0.42 (*KIAA1641*).

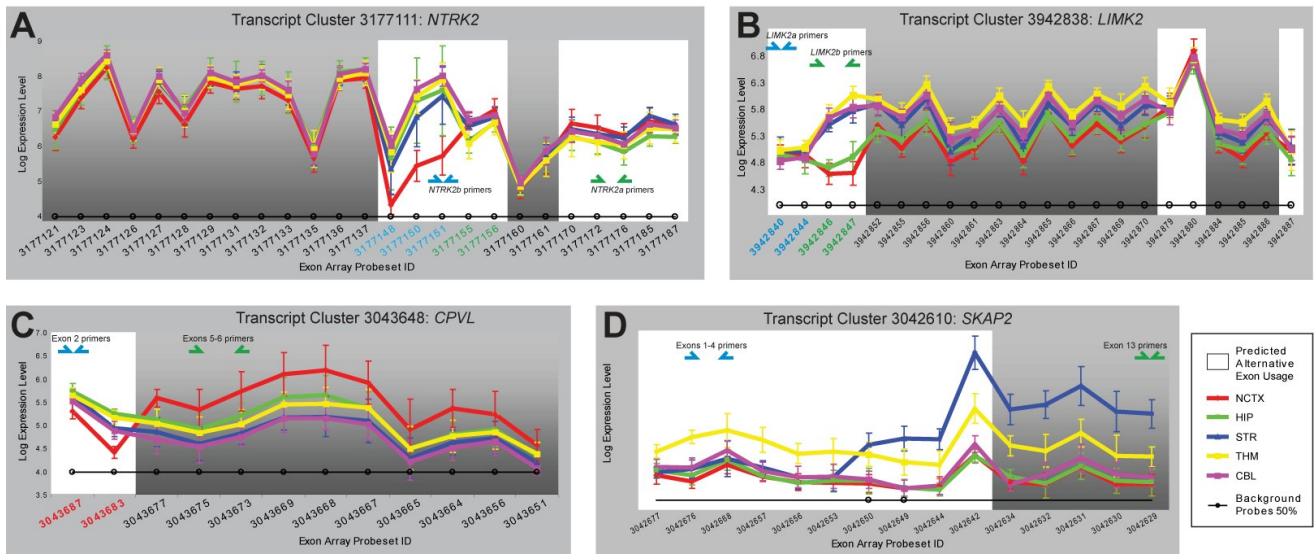

### Supplemental Figure 9. Identification of Differential Alternative Splicing Across Brain Regions by Exon Array Probeset-Level Expression Data

Plotted are expression levels (y-axis) for each probeset (x-axis) for genes with a statistically significant interaction between probeset expression (“exon usage”) and brain region. Non-parallel probeset expression levels, highlighted in white, indicate region-dependent differential splicing of the corresponding exons. Blue and green arrows indicate the exon locations of isoform- or exon-specific qRT-PCR primers. Plots are adapted from the XRAY auto-generated output.

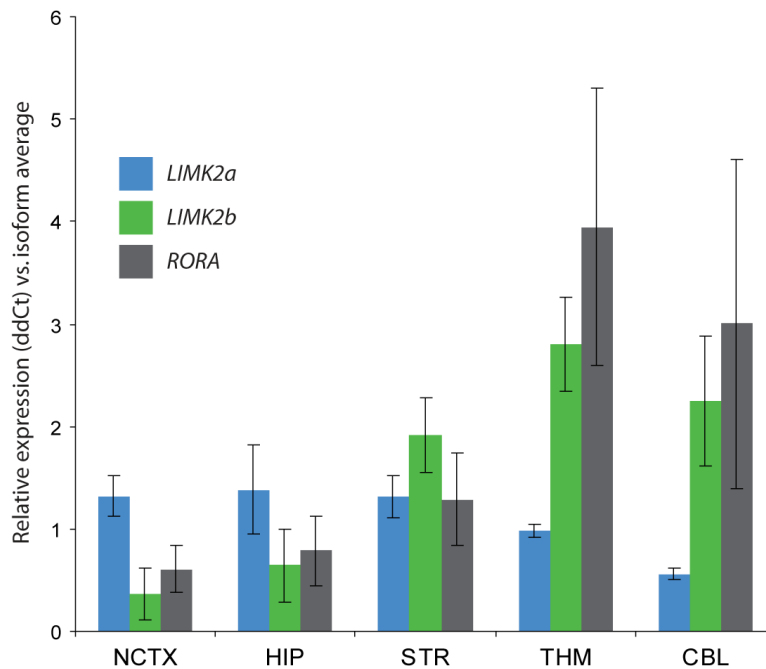

**Supplemental Figure 10. Differential Alternative Splicing of *LIMK2* Corresponds to Expression of its Putative Regulator *RORA***

Confirmation by qRT-PCR of the regional differential alternative splicing of *LIMK2*, together with qRT-PCR confirmation of differential expression of *RORA*. Enrichment of *RORA* in THM and CBL correlates with *LIMK2b*, but not *LIMK2a*. Interestingly, the original report of alternative splicing of *LIMK2* also reported evidence for regulation of the *b*, but not the *a* isoform by *RORA* (Nomoto et al., 1999). These data suggest that Exon Array alternative splicing analysis may be useful in predicting or refining isoform-specific transcriptional regulatory relationships. Data are mean±SEM.

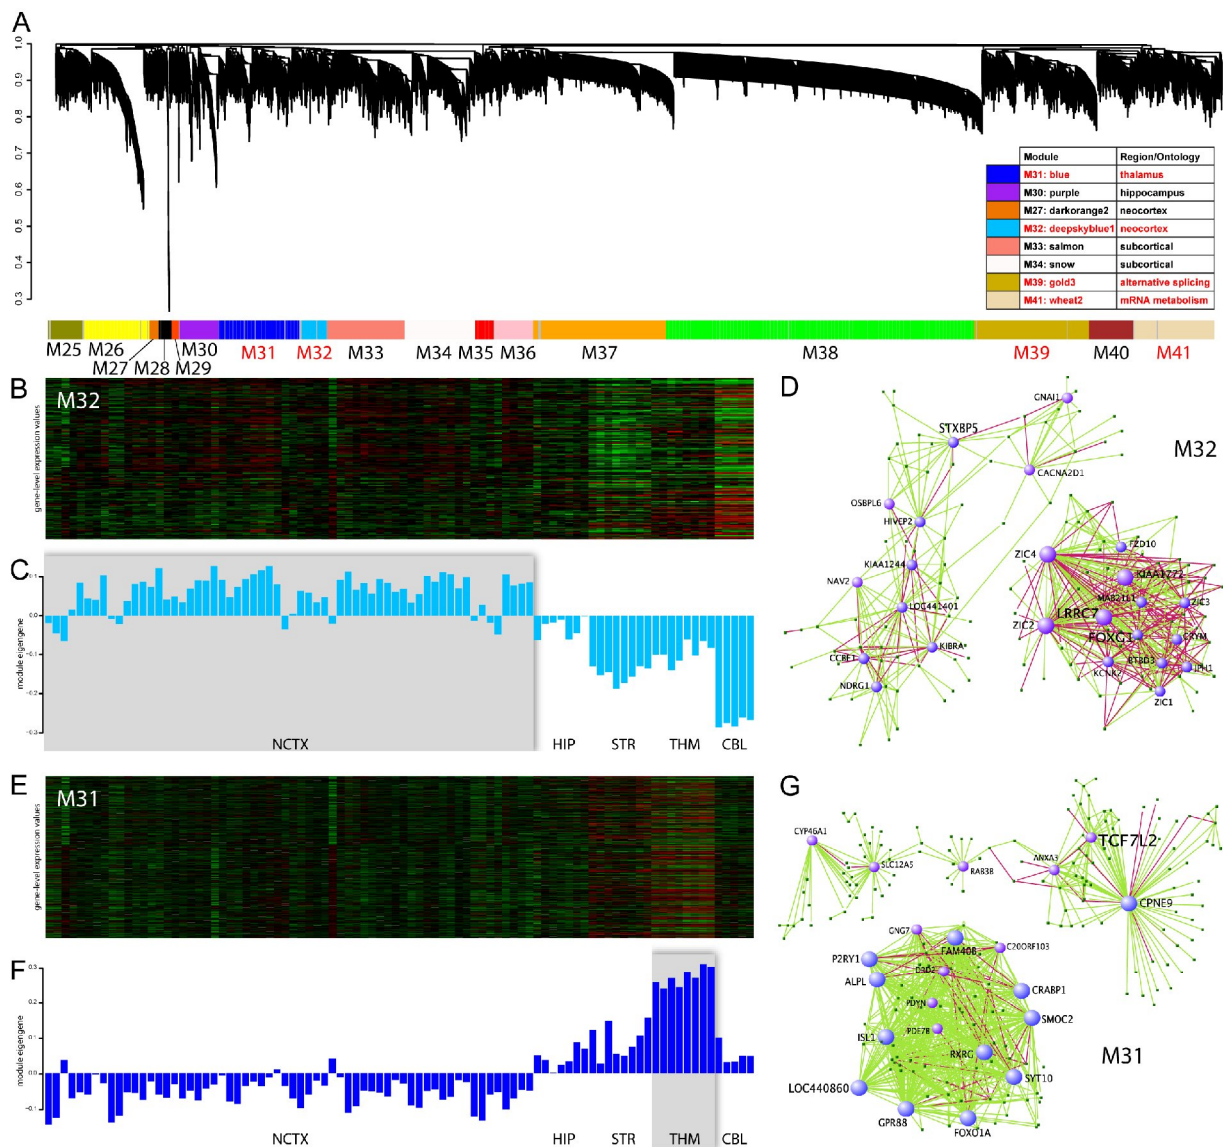

### Supplemental Figure 11. Network Structure of Gene Co-Expression Relationships in the Mid-Fetal Human Brain

Weighted gene co-expression network analysis (WGCNA) was performed on gene-level expression data to identify modules of co-regulated genes within different brain regions. (A) Clustering of genes based on topological overlap (TO) identifies modules of co-regulated genes in the developing human brain. Modules are defined by dynamic tree cutting. (B-D) Module M32 corresponds to NCTX and contains many genes specifically enriched or suppressed in NCTX. The hub gene *LRRC7* encodes a well-known post-synaptic density protein, also known as *Densin-180*, involved in dendritic outgrowth and arborization. This module also contains a disproportionate number of TALE-type homeobox transcription factors, including *MEIS1* and the *Iriquois homeobox* family members 1, 2, 3, and 5 (Table S12). (E-G) Module M31 corresponds to THM and contains a high proportion of THM-enriched genes. The hub gene *TCF7L2* is a transcription factor in the Wnt signaling pathway and has been found to be enriched in specific thalamic nuclei in adult rhesus macaque. Interestingly, this module contains at least 13 other genes putatively involved in the Wnt pathway (Table S13), suggesting a significant involvement of this pathway in human THM development.

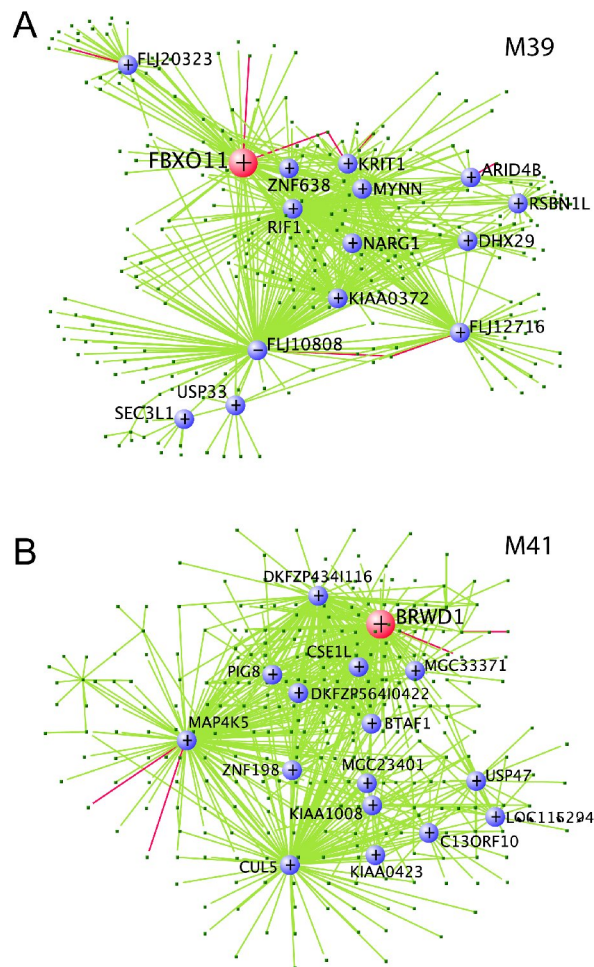

**Supplemental Figure 12. Alternative Splicing and mRNA Metabolism Network Modules**

Only two modules from the network pictured in Figure S10A contained more genes that were DAS than those that were DEX, suggesting a common program of alternative splicing may underlie these modules' transcriptional co-regulation. **(A)** Gene Ontology analysis of module M39 revealed a significant enrichment of terms related to mRNA splicing and processing. Genes in this module included several HNRP, DEAD box, and Splicing Factor family genes, as well as the neuronal-specific splicing factor *PTBP2* (Table S16). **(B)** Module M41 was annotated with many of the same mRNA splicing and processing GO terms. However, the most significantly enriched terms were more broadly related to mRNA metabolism and transcriptional regulation, suggesting a more general transcriptional machinery network.

## Supplemental Experimental Procedures

### Human Brain Specimens and Tissue Processing

This study was carried out using post-mortem human brain specimens collected from the Human Fetal Tissue Repository at the Albert Einstein College of Medicine (AECOM), according to guidelines on the research use of human brain tissue and approval by the Human Investigation Committees from the AECOM and Yale University School of Medicine. For each tissue donation, appropriate maternal written informed consent was obtained and all available non-identifying information was recorded. The fetal age was determined by the date of last menstruation, ultrasonographic scanning, and/or foot length. Only brains with no signs of malformations or brain lesions were collected. Four mid-fetal brains were inspected for gross anatomical defects, and microdissected to isolate samples from specific brain regions. We chose these samples based on our confidence in identifying these regions at the late mid-fetal stage, and with the additional goal of limiting the time of dissection and thus the total postmortem delay, as well as the maximum difference in dissection time between brain areas. Dissected tissue was fresh-frozen in Trizol for RNA and DNA extraction, with a post-mortem interval of less than 1 hour. The tissue remaining after microdissection was fixed, cryoprotected, frozen, and stored at  $-80^{\circ}\text{C}$ . Tissue sections were analyzed for neuropathological or developmental defects. In addition to normal cellular distribution identified by Nissl staining, we used various immunohistochemical markers to confirm the presence of all major neuronal and glial cell types present at this developmental age (Figures S1-S2 and data not shown). Details on the specimens, tissue processing, and microdissection are shown in the Supplemental Experimental Procedures and Table S1, available with this article online.

### RNA Processing and Affymetrix Exon Array Hybridization

Total RNA was isolated using TRIzol and further purified using the Qiagen RNeasy kit. The quality of total RNA was determined by A260/A280 ratio to be at least 1.8, and further checked by electrophoresis on an Agilent Bioanalyzer. Ten  $\mu\text{g}$  of very high quality total RNA from each sample was provided to the Yale Neuroscience Microarray Center facility for cRNA labeling, hybridization, and data analysis.

Preparation of labeled cDNA for hybridization onto Affymetrix GeneChips followed the recommended Affymetrix protocol. An aliquot of 1  $\mu\text{g}$  of sample was subjected to ribosomal RNA (rRNA) reduction. Quality of the rRNA reduction was determined by comparing the reduced RNA to the total RNA on the Bioanalyzer. Double-stranded cDNA and cRNA were synthesized. After the purification of cRNA, the first strand of cDNA was synthesized and fragmented to the size of 35 to 200 bases. The fragmented sample was then terminally labeled with biotin. Integrity of cDNA and fragmented cDNA was assessed by running aliquots on the Bioanalyzer before proceeding.

The entire fragmented sample was combined with a hybridization cocktail and loaded onto the Exon 1.0 ST Array. The hybridization cocktail contains control oligonucleotide B2 and 20X eukaryotic hybridization controls (bioB, bioC, bioD, Cre). These reagents serve as internal controls for hybridization efficiency. The arrays were hybridized for 16h at  $45^{\circ}\text{C}$  in a rotisserie oven. After hybridization, arrays were washed using the Affymetrix fluidics station and stained with streptavidin-phycoerythrin according to the Affymetrix technical manual. Washed arrays were scanned on an Affymetrix GeneChip Scanner 3000, and the output files visually inspected for hybridization artifacts. The quality of the data was evaluated by checking the following quality control parameters:

Hybridization Controls: Presence of spiked-in control cRNAs bioB, bioC, bioD, and Cre serve as positive controls for hybridization. The data was considered acceptable if the hybridization intensities for these controls were present in increasing amounts, bioB being the lowest and Cre the highest.

Labeling Controls: Poly-A RNA controls are added at the beginning of the process to assess the whole target labeling process. The genes used for labeling controls are in vitro synthesized from *B. subtilis* that are absent in eukaryotic samples. These genes are lys, phe, thr, and dap.

## **Histology and Immunohistochemistry**

Additional specimens obtained at AECOM were collected in cold DEPC-treated phosphate buffered saline (D-PBS) and separated from surrounding tissue. To obtain coronal tissue sections, specimens were immediately dissected into approximately 1 cm thick slabs and fixed in 4% (w/v) paraformaldehyde (PFA)/D-PBS for 36 hours at 4 °C. To obtain sagittal tissue sections, specimens were cut at the level of the midbrain to separate the brain stem and cerebellum from the cerebrum. Following fixation tissue was cryoprotected in graded sucrose solutions [10%, 20%, and 30% (w/v) in D-PBS] at 4 °C, embedded in Tissue-Tek O.C.T. (Sakura Finetek), frozen at -40 °C in 2-methylbutane (J.T. Baker), and stored at -80 °C. Coronally or sagittally oriented tissue sections (30 µm and 60 µm thick) were prepared using a Leica CM3050S cryostat and mounted onto Superfrost/Plus slides (Fisher Scientific Co.) or stored as free-floating sections in D-PBS at 4 °C. The following primary antibodies with listed host animal, dilution, and source information, were used in images shown in this manuscript: anti-BCL11B (Rat, 1:250, Abcam/ab18465), anti-CNTNAP2 (Rabbit, 1:500, US Biological/C2089), anti-FOXP2 (Rabbit, 1:100, Rasin et al., 2007; Rabbit, 1:150000, Abcam/ab58599), anti-GABA (Rabbit, 1:2000, Sigma/A2052), anti-GFAP (Guinea pig, 1:500, Advanced ImmunoChemical/031223), anti-NeuN (mouse, 1:500, Chemicon/MAB377), anti-POU3F3 (Goat, 1:100, Santa Cruz Biotechnology/sc-6028), anti-RELN (Mouse, 1:100, gift of M. Ogawa; Ogawa et al., 1995), and anti-SOX5 (Goat, 1:100, Santa Cruz Biotechnology/sc-17329).

For 3,3'-diaminobenzidine (DAB; a chromogen) immunohistochemistry (IHC), slide mounted (30 or 60 µm) or free-floating (60 µm) tissue sections were first washed in PBS and quenched with 1% hydrogen peroxide in PBS, to block endogenous peroxidase activity. Next, the sections were washed in PBS and incubated in blocking solution (BS) containing 5% (v/v) normal donkey serum (Jackson ImmunoResearch Laboratories), 1% (w/v) bovine serum albumin, 0.1% (w/v) glycine, 0.1% (w/v) L-lysine, and 0.4% (v/v) Triton X-100 in PBS for 1 hr at room temperature. Sections were then incubated for 20 to 36 hrs at 4 °C in primary antibodies diluted in BS. The sections were incubated in the appropriate donkey biotinylated secondary antibodies (Jackson ImmunoResearch Labs) diluted 1:250 in BS for 1.5-2 hrs at RT. Following washing in PBS, sections were incubated in avidin-biotin-peroxidase complex (Vectastain ABC Elite kit; Vector Laboratories) for 1 hr at RT. Sections were washed in PBS (3 x 15 min) and incubated for 5 min in 20 ml of PBS containing 0.05% (w/v) DAB, 0.04% (w/v) ammonium chloride, 0.5-1 mg glucose oxidase type VII, and 80 µl of 0.05M nickel ammonium sulfate in 0.2M acetate buffer (pH 6.0). The peroxidase reaction was started by adding 400 µl of 10% (w/v) D-glucose/PBS and stopped 5-10 min later by washing in PB. Alternatively, developing was performed using a DAB peroxidase substrate kit according to the manufacturer's protocol (catalog #SK-4100; Vector Laboratories). Finally, sections were dehydrated, mounted on Superfrost Plus charged slides and coverslipped with Permount (Fisher Scientific Co.).

For triple labeled immunofluorescence staining of CNTNAP2, GFAP, and NeuN, tissue sections were incubated with appropriate donkey secondary antibody conjugated to Cy2, Cy3, or Cy5 (Jackson ImmunoResearch Labs). Single optical images were collected on a Zeiss LSM 510 laser-scanning microscope.

## **Illumina DNA Microarray Quality Control**

Genomic DNA was extracted using the AllPrep Mini Kit (Qiagen) according to the manufacturer's instructions. Quality of genomic DNA was confirmed by running an agarose gel (150 ng/sample on a 1% gel). Only samples that had fragments longer than 2 kb were used for Illumina genotyping assays. We performed genotyping with the Illumina Infinium HumanHap 650Y BeadChips, with probes at 660,755 spots on the genome and a mean inter-probe spacing of 4.5kb, using methods previously described (Peiffer et al., 2006). The Illumina chips were scanned with a BeadArray Reader, a confocal fluorescent scanner that excites the fluorophors generated during the signal amplification of the allele-extension products on the BeadChips. The image intensities and genotypes were extracted using



Illumina's BeadScan software. Our four specimens were compared to a standard set of intensities from 120 HapHap samples for the determination of any changes in DNA copy number for each SNP. All chips had call rates above 95%, indicating high data quality. We used both a published algorithm, PennCNV (Wang et al., 2007), and our own in-house software, to predict CNVs from these data.

### **Exon Microarray Data Analysis**

All microarray data analyses were performed on Dell desktop computers. Affymetrix CEL files were imported into Partek Genomics Suite (Partek GS; Partek, Inc.) using the default Robust Multichip Average (RMA) settings: RMA background correction, quantile normalization, GC content adjustment, mean probeset summarization, and log<sub>2</sub> transformation. PCA, ANOVA, and t-tests reported here were performed using the core, unbounded probesets, as defined by Affymetrix, which were averaged to yield gene summary scores for 17,421 transcript clusters. All ANOVAs included brain specimen and hybridization date as cofactors to exclude batch effects and individual genetic variation. In addition, repeated analyses were performed after excluding potential outliers (three NCTX samples more than three standard deviations from a PCA cluster center, based on all core transcripts; see Figure S5). These analyses marginally reduced the total number of significant results, but did not affect any of the highly DEX genes discussed in detail in this paper.

Partek GS was similarly used to prepare data for the UCSC Human Genome Browser track, as follows: "full" probesets were imported using RMA settings without log transformation, and untransformed expression values from each array were divided by values from an array hybridized with pooled RNA from all samples of the same brain. This ratio was then log<sub>2</sub>-transformed to generate the "signal log ratio" (SLR) values presented on the Genome Browser track. SLR values were calculated in this way to be consistent with the Affy All Exon track data supplied by Affymetrix.

Similarly, the Excel Array Analysis software package (XRAY; Biotique Systems, Inc.) imported core probesets from Affymetrix CEL files using full quantile normalization, and performed GC content-based probe screening, log transformation, and probeset summarization. Detection above background (DABG) was performed at both the probe and the probeset level using GC-matched background probes, and low-variance probesets were excluded. In addition, individual probesets not expressed significantly above background were excluded from tests for alternative exon usage, as these lead to false positives for tissue-specific alternative splicing. XRAY was used to perform a mixed model, nested analysis of variance (ANOVA) to identify genes differentially expressed (DEX) or alternatively spliced (DAS) across brain regions or neocortical areas. Resulting p-values were corrected for multiple comparisons using the Benjamini and Hochberg False Discovery Rate (FDR) method (Benjamini and Hochberg, 1995). See the auto-generated XRAY methods and results paper, available at [www.sestanlab.org/resources](http://www.sestanlab.org/resources), for more XRAY analysis details.

### **Hierarchical Cluster Analysis**

Unsupervised hierarchical clustering was performed in Cluster 3.0 ([bonsai.ims.u-tokyo.ac.jp/~mdehoon/software/cluster](http://bonsai.ims.u-tokyo.ac.jp/~mdehoon/software/cluster); de Hoon et al., 2004). Gene-level group median log expression values returned by XRAY for DEX and DAS genes were mean centered across brain regions, and both genes and brain regions were clustered using uncentered Pearson correlation and average linkage. Heatmaps were generated in Java Treeview ([jtreeview.sourceforge.net](http://jtreeview.sourceforge.net); Saldanha, 2004) and used to identify clusters of correlated transcripts most highly specific for each brain region or neocortical area. Clusters shown in Figures 2 and 3 and listed in the Supplemental Tables were restricted to a minimum correlation of 0.75.

### **Quantitative Real-Time RT-PCR**

Primers for quantitative real-time RT-PCR (qRT-PCR) were designed using the Primer3 software ([fokker.wi.mit.edu/primer3/input.htm](http://fokker.wi.mit.edu/primer3/input.htm)), or the Roche Universal ProbeLibrary Assay Design Center

([www.roche-applied-science.com/sis/rtpcr/upl/index.jsp](http://www.roche-applied-science.com/sis/rtpcr/upl/index.jsp)), which designs intron-spanning primer pairs whenever possible. All primers were blasted against the Ensembl human cDNA database using BlastView ([www.ensembl.org/Homo\\_sapiens/blastview](http://www.ensembl.org/Homo_sapiens/blastview)) to check for non-specific binding.

Whenever possible, alternative exon usage was confirmed by designing primers specific to each known or predicted alternative splice isoform. In the absence of known or computationally predicted isoforms, DAS results were confirmed by comparing primers specific to the known isoform with primers targeting an area common to the known and the predicted transcript.

Template cDNA was synthesized from the same total RNA prepared for Exon Array analyses using the SuperScript III First-Strand Synthesis System (Invitrogen). Real-time PCR was performed on an ABI PRISM 7900 Real Time PCR System (Applied Biosystems) using SYBR Green as the detection method (Power SYBR Green PCR Master Mix, Applied Biosystems). Semi-quantitative RT-PCR, for gel images shown in Figure 6, was performed with the same primers and template, using GoTaq PCR Master Mix (Promega) and a Bio-Rad DNA Engine thermal cycler. PCR products were run on 2% agarose gel with ethidium bromide, photographed with UV illumination, and images inverted in Photoshop.

For quantitative PCR, Ct values greater than two standard deviations from the mean for a given primer pair were excluded as outliers. Duplicate or triplicate reactions were then averaged, and fold-change was calculated by the ddCt method relative to the average dCt across all samples for a given primer pair, with GAPDH as the reference for all genes. DAS candidates were considered confirmed if a two-way ANOVA of sample (brain region or NCTX area) and splice isoform (primer pair) yielded an interaction with  $p < 0.05$ .

### ***In Situ* Hybridization Probe Synthesis and Labeling**

For ISH probe synthesis, we first PCR-cloned the target DNA, between 300-1000 bp, into the pCRII vector, which contains SP6 and T7 RNA polymerase promoter sites for *in vitro* transcription, and amplified the plasmid in competent *E. coli* cells overnight (TOPO TA Cloning Kit with Dual Promoter; Invitrogen). The plasmid was sequenced to confirm the sequence and determine the direction of the DNA insert, and thus which RNA polymerase to use for *in vitro* transcription. The plasmid was then purified and linearized with a restriction enzyme that leaves a 5' overhang, run on an agarose gel to confirm complete digestion, and re-purified with the QIAquick PCR purification kit (Qiagen). The linearized plasmid was resuspended in non-DEPC-treated, nuclease-free water at a concentration of 200-250  $\mu\text{g/ml}$ .

RNA probe synthesis was carried out using the DIG RNA labeling kit (Roche). Briefly, an *in vitro* transcription mixture was prepared with one  $\mu\text{g}$  linearized DNA plasmid; two  $\mu\text{l}$  10x transcription buffer; two  $\mu\text{l}$  DIG RNA labeling mix; one  $\mu\text{l}$  RNase inhibitor; two  $\mu\text{l}$  RNA SP6 or T7 polymerase (depending on the direction of the DNA insert); and non-DEPC-treated nuclease-free water to a final volume of 20  $\mu\text{l}$ . After 2 hours at 37°C, an aliquot was run on a native agarose gel to confirm the RNA product. Reaction was then incubated with 2  $\mu\text{l}$  DNase I (RNase free) for 15 min at 37° to remove template DNA, followed by addition of 2  $\mu\text{l}$  of 0.2 M EDTA (pH 8.0) to stop the reaction. Excess free nucleotides were removed by Micro Bio-Spin 30 RNase-free column (Bio-Rad). Labeled RNA probe was run on a native agarose gel to determine its quality and quantity.

### ***In Situ* Hybridization**

Sections were cut on a Leica cryostat at -20°C; 60  $\mu\text{m}$  sections were immediately mounted on cold, charged Superfrost 2x3" slides, brought to room temperature, and hybridized. Thicker sections, up to 150  $\mu\text{m}$ , were hybridized free-floating in 6-well plates or 60mm dishes and mounted later.

Sections were washed in PBS at room temperature (rt) for 5 min, post-fixed in 4% PFA for 15 min at rt, washed again in PBS 3x5 min, and pre-hybridized in hybridization solution at 70°C for 30 min. No proteinase K treatment was necessary for embryonic brain tissue, which is relatively porous. DIG-

labeled probe was diluted to 0.3  $\mu\text{g}/\text{ml}$  in hybridization buffer, denatured at 75°C for 5 min, and applied to the sections. Sections were hybridized at least overnight at between 60-70°C, depending on probe GC content, specificity of signal, and target abundance.

After washing 3x15 min in TBST at rt, sections were then incubated in AP-conjugated anti-DIG antibody (1:5000 in TBST; Roche) overnight at 4°C. Sections were again washed 3x15 min in TBST and 10 min in staining buffer at rt. Staining buffer was then replaced with fresh staining buffer with PVA and 1:50 NBT/BCIP stock solution (Roche), and sections were incubated in the dark at rt, or overnight at 4°C, until the color reaction was complete. Finally, sections were washed in stop-TE buffer and fixed again with 4% PFC to stop the color reaction, washed in PB, and free-floating sections mounted onto charged Superfrost 2x3" slides.

### Gene Ontology Annotation Analysis

Annotation analysis was performed using the NIAID web-based DAVID software ([david.abcc.ncifcrf.gov](http://david.abcc.ncifcrf.gov); Dennis et al., 2003). The following categories were used to annotate lists of DEX genes: GO Biological Process, Molecular Function, and Cellular Component terms; SwissProt and InterPro protein domain and family terms; KEGG pathways; BIND protein-protein interactions; and OMIM genetic disorder associations. The EASE score, a modified Fisher's exact test, is used to evaluate the overrepresentation or enrichment of a given annotation in a gene list, in comparison to a background gene list (Hosack et al., 2003). In our case, the background consisted of ~17,000 genes represented by the "core" probesets on the Affymetrix Exon Arrays. The DAVID web tool also enables Functional Annotation Clustering, which takes the annotations of a gene list and clusters terms with overlapping member genes. This reduces redundancy across annotation sources, as well as providing insights into relationships between annotations (e.g., the zinc finger protein domain annotation clusters together with the Biological Process transcriptional regulation term, suggesting that zinc finger proteins tend to be transcription factors or co-factors). The geometric mean of the EASE enrichment scores of the terms in a cluster, called the Group Enrichment Score, is then used to reflect the overall enrichment of a biological function or theme in the gene list. See the DAVID website for further details.

### Weighted Gene Co-expression Network Analysis

Gene summary scores were calculated in Partek for all core transcript clusters, and all pairwise Pearson correlations between genes were calculated. Three samples – 18 w.g. left HIP, 19 w.g. left DLPFC, and 19 w.g. right MS – were flagged as potential outliers and excluded from WGCNA. For each gene, the sum of its correlations with all other genes is called connectivity,  $k$ , and represents its connectedness to all other genes. Next, each gene's set of correlations is compared to all other genes' sets of correlations, to calculate each pair of genes' *topological overlap* (TO), which represents the degree to which a pair of genes share the same correlations, or network "neighborhood." Hierarchical clustering is then used to group genes based on their TO into "modules," or networks, and intra-network connectivity ( $k_{in}$ ) is recalculated for genes in a module based only on the other genes in the module. The genes with the highest  $k_{in}$  values are termed "hubs" of the network. Finally, the expression data for genes in a module are subjected to Singular Value Decomposition analysis, and the module eigengene, or first principal component, is plotted to visualize potential relatedness of the module to variables such as brain region, specimen, or hemisphere. Annotated R code used for our network analysis is available at [www.sestanlab.org/resources](http://www.sestanlab.org/resources). General information on network analysis methodology, as well as WGCNA software and R code, is available at [www.genetics.ucla.edu/labs/horvath/CoexpressionNetwork](http://www.genetics.ucla.edu/labs/horvath/CoexpressionNetwork). For more details see Horvath et al. (2006), as well as supplementary material published with Oldham et al. (2006) and Oldham et al. (2008).

### Supplemental References

- Abdueva, D., Wing, M. R., Schaub, B., and Triche, T. J. (2007). Experimental comparison and evaluation of the Affymetrix Exon and U133Plus2 GeneChip Arrays. *PLoS ONE* 2, e913.
- Benjamini, Y., and Hochberg, Y. (1995). Controlling the false discovery rate: A practical and powerful approach to multiple testing. *J. Roy. Statist. Soc. Ser. B. Met.* 57, 289-300.
- Clark, T.A., Schweitzer, A.C., Chen, T.X., Staples, M.K., Lu, G., Wang, H., Williams, A., and Blume, J.E. (2007). Discovery of tissue-specific exons using comprehensive human exon microarrays. *Genome Biol.* 8, R64.
- de Hoon, M.J., Imoto, S., Nolan, J., and Miyano, S. (2004). Open source clustering software. *Bioinformatics* 20, 1453-4.
- Dennis, G., Sherman, T., Hosack, A., Yang, J., Gao, W., Lane, C., and Lempicki, A. (2003). DAVID: Database for Annotation, Visualization, and Integrated Discovery. *Genome Biol.* 4, P3.
- Gardina, P.J., Clark, T.A., Shimada, B., Staples, M.K., Yang, Q., Veitch, J., Schweitzer, A., Awad, T., Sugnet, C., Dee, S., et al. (2006). Alternative splicing and differential gene expression in colon cancer detected by a whole genome exon array. *BMC Genomics* 7, 325.
- Horvath, S., Zhang, B., Carlson, M., Lu, K.V., Zhu, S., Felciano, R.M., Laurance, M.F., Zhao, W., Qi, S., Chen, Z., et al. (2006). Analysis of oncogenic signaling networks in glioblastoma identifies ASPM as a molecular target. *Proc. Natl. Acad. Sci. USA* 103, 17402-17407.
- Hosack, A., Dennis, G., Sherman, T., Lane, C., and Lempicki, A. (2003). Identifying biological themes within lists of genes with EASE. *Genome Biol.* 4, R70.
- Kapur, K., Xing, Y., Ouyang, Z., and Wong, W. (2007). Exon arrays provide accurate assessments of gene expression. *Genome Biol.* 8, R82.
- Kudo, L. C., Karsten, S. L., Chen, J., Levitt, P., and Geschwind, D. H. (2007). Genetic analysis of anterior posterior expression gradients in the developing mammalian forebrain. *Cereb Cortex* 17, 2108-22.
- Leamey, C. A., Glendining, K. A., Kreiman, G., Kang, N., Wang, K. H., Fassler, R., Sawatari, A., Tonegawa, S., and Sur, M. (2007). Differential Gene Expression between Sensory Neocortical Areas: Potential Roles for Ten\_m3 and Bcl6 in Patterning Visual and Somatosensory Pathways. *Cereb Cortex* 18, 53-66.
- Ogawa, M., Miyata, T., Nakajima, K., Yagyū, K., Seike, M., Ikenaka, K., Yamamoto, H., and Mikoshiba, K. (1995). The reeler gene-associated antigen on Cajal-Retzius neurons is a crucial molecule for laminar organization of cortical neurons. *Neuron* 14, 899-912.
- Oldham, M. C., Horvath, S., and Geschwind, D. H. (2006). Conservation and evolution of gene coexpression networks in human and chimpanzee brains. *Proc Natl Acad Sci U S A* 103, 17973-8.
- Peiffer, D.A., Le, J.M., Steemers, F.J., Chang, W., Jenniges, T., Garcia, F., Haden, K., Li, J., Shaw, C.A., Belmont, J., et al. (2006). High-resolution genomic profiling of chromosomal aberrations using Infinium whole-genome genotyping. *Genome Res.* 16, 1136-1148.

Rasin, M.R., Gazula, V.R., Breunig, J.J., Kwan, K.Y., Johnson, M.B., Liu-Chen, S., Li, H.S., Jan, L.Y., Jan, Y.N., Rakic, P., et. al. (2007). Numb and Numbl are required for maintenance of cadherin-based adhesion and polarity of neural progenitors. *Nat. Neurosci.* *10*, 819-27.

Saldanha, A.J. (2004). Java Treeview - extensible visualization of microarray data. *Bioinformatics* *20*, 3246-8.

Wang, K., Li, M., Hadley, D., Liu, R., Glessner, J., Grant, S. F., Hakonarson, H., and Bucan, M. (2007). PennCNV: An integrated hidden Markov model designed for high-resolution copy number variation detection in whole-genome SNP genotyping data. *Genome Res.* *17*, 1665-1674.

**Supplemental Table Descriptions**

All tables are available as Excel spreadsheets at [www.sestanlab.org/resources/](http://www.sestanlab.org/resources/).

Table S1. Fetal human brain specimens. The first four specimens were microdissected for Affymetrix Exon Array profiling and qRT-PCR validation. Genomic DNA was also hybridized to Illumina genotyping arrays for copy number analysis (Table S2). Leftover tissue was fixed, frozen, and sectioned for histological and immunohistochemical analyses (e.g., Figures S1-S2). The additional thirteen mid-fetal human brains listed here were used for candidate gene validations by *in situ* hybridization and immunohistochemistry (e.g., Figures 4 and S6) as well as some additional qRT-PCR experiments. All specimens had post-mortem intervals less than one hour, and were free of gross morphological defects.

Table S2. Complete list of predicted copy number variations. This table shows the predicted CNVs for each sample, with the chromosomal location, as well as the first and last SNP. The type of CNV is also indicated, with HOMODEL being a homozygous deletion, HETDEL a heterozygous deletion, HETDUP a heterozygous duplication, and AMPLIF being an amplification. If the CNV hits a gene, it is listed as coding; if it only hits an intron, it is listed as intronic; otherwise the CNV is labeled intergenic. Also, the overlap with known CNVs from the Toronto Database of Genomic Variants or Segmental Duplications is noted. Sample 060426 shows a higher number of CNVs likely due to its lower genotyping call rate (95%), which is known to introduce more false positive CNVs (Wang et al., 2007); all other chips are at 99% call rate. However, total numbers of predicted CNVs for each brain are within the range of variation seen in a control set of 125 well-characterized HapMap individuals (Figure S3).

Table S3. Exon Array hybridizations and sample info. RNA isolated from each area illustrated in Figure 1 was hybridized independently from each of the four brains, with the following exceptions: left and right cerebellum were collected separately only from specimen 070404 (19 wg); and OPFC was obtained only from specimen 070404 (19 wg).

Table S4. Numbers of expressed and region-specific genes. Tables display numbers of expressed (present), DEX, and DAS core transcripts from each of four distinct XRAY mixed model analyses of variance, as described in the main text.

Table S5. Numbers of genes and correlations for clusters illustrated in Figures 2 and 3. Uncentered Pearson correlations were obtained by unsupervised hierarchical clustering as described in the Supplemental Experimental Procedures.

Table S6. Gene lists for clusters illustrated in Figure 2.

Table S7. Gene lists for intra-NCTX clusters illustrated in Figure 3a.

Table S8. Gene lists for PFC clusters illustrated in Figure 3b.

Table S9. Additional DEX genes validated by qRT-PCR, ISH, and IHC.

Table S10. Perisylvian NCTX-enriched genes.

Table S11. Comparison with adult human brain microarray data. Roth et al. (2006) represents the most spatially comprehensive microarray analysis of human brain previously published. “Probe ID” corresponds to the probeset ID from Affymetrix U133 Plus 2.0 arrays. ND, No Data: equivalent probesets not present or not analyzed, due to contraindications such as discontinued gene records.

Table S12. Comparison with published developing mouse cortex microarray data. ND, No Data: equivalent probesets not present or not analyzed, due to contraindications such as discontinued gene records or lack of homology.

Table S13. DEX genes with associated haCNSs, which are numbered as in Prabhakar et al. (2006). Genomic locations of haCNSs are in hg18 coordinates (NCBI build 36.1).

Table S14. Gene ontology functional annotation clustering.

Table S15. M32 (deepskyblue1): NCTX module.

Table S16. M31 (blue): THM module.

Table S17. M15 (cyan): PFC module.

Table S18. M24 (orange): Non-PFC module.

Table S19. M39 (gold3): Alternative splicing module.

Table S20. M41 (wheat2): mRNA metabolism module.

Tables **S15 to S20** list all genes found in network modules described in the main text. In these tables, genes are sorted by kWithin-Connectivity, which represents the within-module connectivity or “hub status” of each gene. In addition, the total connectivity of the gene to the entire network is given (kTotal), as well as the correlation of the gene’s expression data to the module “eigengene,” or first

principal component (eigencorr), and the significance of this correlation (eigenpval) which determines the module membership. Genes with negative correlations are indicated in red. Finally, at the right are appended the FDR-corrected p-values for module genes that were also DEX or DAS. All additional network modules are available at [www.sestanlab.org/resources/](http://www.sestanlab.org/resources/).



**Table S1. Human Fetal Brain Specimens**

All specimens had less than one hour post-mortem interval, and were free of gross morphological defects.

|                                                                                                   | Case   | Age (wg) | Fetal gender | Facial or bodily abnormalities | Gross brain abnormalities | Microscopic brain abnormalities | Chromosomal abnormalities | Maternal ethnicity | Maternal age (years old) | Maternal medical history                                                                                                                         | EtOH use (donor) | Cigarette and drug use (donor) |
|---------------------------------------------------------------------------------------------------|--------|----------|--------------|--------------------------------|---------------------------|---------------------------------|---------------------------|--------------------|--------------------------|--------------------------------------------------------------------------------------------------------------------------------------------------|------------------|--------------------------------|
| Microdissected for Affymetrix Exon Microarrays                                                    | 060426 | 18       | Male         | None                           | None                      | None                            | None                      | Hispanic           | 20                       | Low grade squamous intraepithelial lesion                                                                                                        | None             | None                           |
|                                                                                                   | 070404 | 19       | Female       | None                           | None                      | None                            | None                      | Caucasian          | 39                       | Asthma (Rx: Albuterol); Migraines (Rx: T#3 prn); Depression (Rx: Celexa); Pregnancy risk category C; Respiratory Px; Increased CNS irritability. | Occasional       | None                           |
|                                                                                                   | 060118 | 21       | Female       | None                           | None                      | None                            | None                      | Hispanic           | 27                       | Healthy                                                                                                                                          | None             | None                           |
|                                                                                                   | 051214 | 23       | Female       | None                           | None                      | None                            | None                      | Asian              | 36                       | Healthy                                                                                                                                          | None             | None                           |
| Additional brains used for validation by qRT-PCR, immunohistochemistry, and in situ hybridization | 060524 | 18       | M            | None                           | None                      | None                            | ---                       | Hispanic           | 22                       | healthy                                                                                                                                          | None             | None                           |
|                                                                                                   | 060524 | 19       | F            | None                           | None                      | None                            | ---                       | Black              | 19                       | healthy                                                                                                                                          | None             | None                           |
|                                                                                                   | 070314 | 19       | F            | None                           | None                      | None                            | ---                       | Black              | 17                       | healthy                                                                                                                                          | None             | None                           |
|                                                                                                   | 060726 | 20       | F            | None                           | None                      | None                            | ---                       | Black              | 16                       | healthy                                                                                                                                          | None             | None                           |
|                                                                                                   | 060927 | 20       | F            | None                           | None                      | None                            | ---                       | No data            | 26                       | allergy: brethine, dilantin                                                                                                                      | No data          | No data                        |
|                                                                                                   | 061122 | 20       | M            | None                           | None                      | None                            | ---                       | Caucasian          | 20                       | healthy                                                                                                                                          | None             | None                           |
|                                                                                                   | 060215 | 21       | No data      | None                           | None                      | None                            | ---                       | Hispanic           | 21                       | anemia                                                                                                                                           | None             | None                           |
|                                                                                                   | 061220 | 21       | M            | None                           | None                      | None                            | ---                       | Black              | 16                       | healthy                                                                                                                                          | None             | None                           |
|                                                                                                   | 070321 | 21       | M            | None                           | None                      | None                            | ---                       | Hispanic           | 22                       | asthma (attack 2 y ago) (Rx: albuterol); allergy (PCN = anaphylaxis)                                                                             | None             | None                           |
|                                                                                                   | 060426 | 22       | M            | None                           | None                      | None                            | ---                       | No data            | 15                       | elevated WBC                                                                                                                                     | None             | None                           |
|                                                                                                   | 061213 | 22       | F            | None                           | None                      | None                            | ---                       | Black              | 23                       | healthy                                                                                                                                          | None             | None                           |
|                                                                                                   | 070214 | 22       | F            | None                           | None                      | None                            | ---                       | Hispanic           | 29                       | depression; allergy(shellfish); Hx: lead poisoning (@ 8yo); polycystic ovarian syndrome                                                          | None             | Marijuana                      |
| 060118                                                                                            | 24     | F        | None         | None                           | None                      | ---                             | Black                     | 26                 | abNI PAP                 | None                                                                                                                                             | None             |                                |

**Table S2. Complete list of predicted copy number variations**

| Sample ID | CHR   | start       | stop        | first SNP  | last SNP   | # snps | CNV size | CNV type | Region     | SegDups | known CNV? |
|-----------|-------|-------------|-------------|------------|------------|--------|----------|----------|------------|---------|------------|
| 051214    | chr17 | 14,984,724  | 14,998,961  | rs7212945  | rs1122073  | 7      | 14,238   | HOMODEL  | intergenic | 0       | yes        |
| 051214    | chr1  | 12,805,593  | 12,848,162  | rs864728   | rs11810835 | 4      | 42,570   | HETDEL   | coding     | 21      | yes        |
| 051214    | chr2  | 72,163,406  | 72,182,606  | rs1878503  | rs1400681  | 6      | 19,201   | HETDEL   | intergenic | 0       | no         |
| 051214    | chr5  | 110,933,970 | 110,938,684 | rs384970   | rs421880   | 4      | 4,715    | HETDEL   | intergenic | 0       | no         |
| 051214    | chr7  | 141,225,812 | 141,241,903 | rs4329195  | rs12535134 | 10     | 16,092   | HETDEL   | coding     | 0       | no         |
| 051214    | chr9  | 9,780,222   | 9,786,577   | rs1174590  | rs10977985 | 8      | 6,356    | HETDEL   | intergenic | 0       | yes        |
| 051214    | chr14 | 43,575,763  | 43,600,472  | rs12895857 | rs1950538  | 8      | 24,710   | HETDEL   | intergenic | 0       | yes        |
| 051214    | chr4  | 68,961,744  | 68,967,409  | rs11933242 | rs7670560  | 3      | 5,666    | HETDUP   | intergenic | 1       | yes        |
| 051214    | chr5  | 28,842,013  | 28,851,719  | rs2548005  | rs16898178 | 3      | 9,707    | HETDUP   | intergenic | 0       | yes        |
| 051214    | chr5  | 178,863,857 | 178,915,052 | rs6886690  | rs4701131  | 10     | 51,196   | HETDUP   | coding     | 4       | yes        |
| 051214    | chr8  | 145,064,091 | 145,247,517 | rs6558406  | rs13264654 | 17     | 183,427  | HETDUP   | coding     | 0       | yes        |
| 051214    | chr12 | 11,367,992  | 11,434,269  | rs10845332 | rs10743954 | 15     | 66,278   | HETDUP   | coding     | 6       | yes        |
| 051214    | chr12 | 130,446,153 | 130,722,540 | rs7138697  | rs6598159  | 54     | 276,388  | HETDUP   | coding     | 13      | yes        |
| 051214    | chr14 | 85,926,044  | 85,933,039  | rs7143328  | rs17122289 | 4      | 6,996    | HETDUP   | intergenic | 0       | no         |
| 060118    | chr7  | 141,702,280 | 141,711,358 | rs12668690 | rs17163396 | 5      | 9,079    | HOMODEL  | intergenic | 1       | yes        |
| 060118    | chr1  | 67,701,712  | 67,711,010  | rs11209101 | rs4655724  | 8      | 9,299    | HETDEL   | intergenic | 0       | no         |
| 060118    | chr6  | 2,541,933   | 2,548,332   | rs4959195  | rs12526493 | 3      | 6,400    | HETDEL   | intergenic | 0       | yes        |
| 060118    | chr6  | 31,416,609  | 31,426,123  | rs9265797  | rs2523619  | 5      | 9,515    | HETDEL   | intergenic | 0       | yes        |
| 060118    | chr6  | 81,341,226  | 81,344,394  | rs4706852  | rs1454466  | 3      | 3,169    | HETDEL   | intergenic | 0       | yes        |
| 060118    | chr11 | 62,594,645  | 62,604,138  | rs12290156 | rs7926818  | 5      | 9,494    | HETDEL   | intergenic | 0       | yes        |
| 060118    | chr13 | 83,000,441  | 83,055,928  | rs1412856  | rs9805405  | 19     | 55,488   | HETDEL   | intergenic | 0       | yes        |
| 060118    | chr18 | 1,903,316   | 1,970,668   | rs313038   | rs12604106 | 20     | 67,353   | HETDEL   | intergenic | 0       | yes        |
| 060118    | chr3  | 12,653,013  | 12,738,841  | rs13060691 | rs6442325  | 13     | 85,829   | HETDUP   | coding     | 1       | yes        |
| 060118    | chr5  | 104,124,529 | 104,167,702 | rs161641   | rs1606554  | 12     | 43,174   | HETDUP   | intergenic | 0       | yes        |
| 060118    | chr6  | 29,944,503  | 29,976,963  | rs9258866  | rs2517904  | 8      | 32,461   | HETDUP   | coding     | 2       | yes        |
| 060118    | chr7  | 18,025,122  | 18,033,655  | rs1919315  | rs366909   | 5      | 8,534    | HETDUP   | intergenic | 0       | no         |
| 060118    | chr8  | 139,851,720 | 139,855,420 | rs4736183  | rs11781300 | 4      | 3,701    | HETDUP   | intron     | 0       | no         |
| 060118    | chr8  | 145,064,091 | 145,247,517 | rs6558406  | rs13264654 | 17     | 183,427  | HETDUP   | coding     | 0       | yes        |
| 060118    | chr9  | 131,425,241 | 131,467,282 | rs2277153  | rs7024039  | 19     | 42,042   | HETDUP   | coding     | 0       | no         |
| 060118    | chr13 | 79,240,187  | 79,309,824  | rs9574473  | rs6563138  | 7      | 69,638   | HETDUP   | intergenic | 0       | no         |
| 060118    | chr19 | 58,224,973  | 58,244,108  | rs2870438  | rs12151194 | 5      | 19,136   | HETDUP   | intron     | 0       | yes        |
| 060118    | chr19 | 59,423,491  | 59,435,029  | rs17207328 | rs17239607 | 6      | 11,539   | HETDUP   | coding     | 0       | yes        |
| 060118    | chr4  | 955,609     | 1,068,426   | rs11724804 | rs17164229 | 14     | 112,818  | AMPLIF   | coding     | 0       | no         |
| 060118    | chr17 | 76,034,556  | 76,050,172  | rs4074302  | rs4563088  | 4      | 15,617   | AMPLIF   | intergenic | 0       | no         |
| 070404    | chr5  | 117,418,263 | 117,421,055 | rs10071435 | rs2900114  | 6      | 2,793    | HOMODEL  | intergenic | 0       | yes        |
| 070404    | chr3  | 89,488,444  | 89,499,754  | rs9836340  | rs870898   | 4      | 11,311   | HETDEL   | intron     | 0       | yes        |
| 070404    | chr5  | 104,240,839 | 104,339,732 | rs10069629 | rs10066783 | 28     | 98,894   | HETDEL   | intergenic | 0       | yes        |
| 070404    | chr6  | 67,075,448  | 67,105,019  | rs9453702  | rs1634207  | 13     | 29,572   | HETDEL   | intergenic | 0       | yes        |
| 070404    | chr12 | 11,411,688  | 11,466,837  | rs10845343 | rs7134383  | 6      | 55,150   | HETDEL   | coding     | 5       | yes        |
| 070404    | chr13 | 83,000,441  | 83,055,928  | rs1412856  | rs9805405  | 19     | 55,488   | HETDEL   | intergenic | 0       | yes        |
| 070404    | chr21 | 18,463,191  | 18,475,103  | rs11911479 | rs4816766  | 4      | 11,913   | HETDEL   | intron     | 0       | yes        |
| 070404    | chr4  | 36,993,280  | 37,006,227  | rs1648408  | rs1365338  | 6      | 12,948   | HETDUP   | intergenic | 0       | no         |
| 070404    | chr8  | 122,391,890 | 122,468,048 | rs10156248 | rs2386121  | 22     | 76,159   | HETDUP   | intergenic | 0       | no         |
| 070404    | chr19 | 58,028,179  | 58,036,513  | rs10401828 | rs10420793 | 4      | 8,335    | HETDUP   | coding     | 1       | yes        |
| 060426    | chr9  | 84,250,769  | 84,262,073  | rs11999685 | rs12684844 | 4      | 11,305   | HOMODEL  | intergenic | 0       | no         |
| 060426    | chr13 | 32,110,785  | 32,111,330  | rs399622   | rs7335992  | 3      | 546      | HOMODEL  | intron     | 0       | no         |
| 060426    | chr14 | 41,839,034  | 41,860,993  | rs7151396  | rs2086797  | 4      | 21,960   | HOMODEL  | intergenic | 0       | no         |
| 060426    | chr20 | 58,064,721  | 58,073,135  | rs6027262  | rs7263401  | 7      | 8,415    | HOMODEL  | coding     | 0       | no         |
| 060426    | chr1  | 101,777,242 | 101,832,947 | rs1199582  | rs12067639 | 28     | 55,706   | HETDEL   | intergenic | 0       | yes        |
| 060426    | chr1  | 173,879,950 | 173,899,093 | rs16848901 | rs875410   | 8      | 19,144   | HETDEL   | intron     | 0       | yes        |
| 060426    | chr2  | 69,617,587  | 69,768,879  | rs6743528  | rs4852918  | 34     | 151,293  | HETDEL   | coding     | 0       | yes        |
| 060426    | chr3  | 64,832,568  | 64,883,916  | rs2197116  | rs6779770  | 22     | 51,349   | HETDEL   | intergenic | 0       | no         |
| 060426    | chr3  | 112,197,449 | 112,396,662 | rs9835919  | rs7610754  | 14     | 199,214  | HETDEL   | coding     | 0       | no         |
| 060426    | chr3  | 112,662,011 | 112,690,660 | rs9826798  | rs1391364  | 8      | 28,650   | HETDEL   | intergenic | 0       | no         |
| 060426    | chr3  | 145,021,698 | 145,042,360 | rs9822158  | rs16854463 | 17     | 20,663   | HETDEL   | coding     | 0       | no         |
| 060426    | chr3  | 163,613,385 | 163,712,278 | rs4856685  | rs7627193  | 19     | 98,894   | HETDEL   | intergenic | 0       | yes        |
| 060426    | chr3  | 189,969,724 | 190,002,946 | rs2030582  | rs3856919  | 15     | 33,223   | HETDEL   | intron     | 0       | no         |
| 060426    | chr3  | 190,163,952 | 190,189,143 | rs16863811 | rs848977   | 11     | 25,192   | HETDEL   | intergenic | 0       | no         |
| 060426    | chr5  | 14,204,799  | 14,343,274  | rs6554843  | rs30628    | 50     | 138,476  | HETDEL   | coding     | 0       | yes        |
| 060426    | chr5  | 57,310,077  | 57,336,759  | rs13189262 | rs12651995 | 7      | 26,683   | HETDEL   | intergenic | 0       | no         |
| 060426    | chr5  | 89,718,678  | 89,737,997  | rs16868602 | rs16868636 | 7      | 19,320   | HETDEL   | coding     | 0       | no         |
| 060426    | chr5  | 120,115,986 | 120,218,258 | rs1449172  | rs10900744 | 24     | 102,273  | HETDEL   | intergenic | 0       | yes        |
| 060426    | chr7  | 7,327,796   | 7,365,929   | rs2018625  | rs10486158 | 20     | 38,136   | HETDEL   | coding     | 0       | yes        |
| 060426    | chr7  | 11,851,207  | 11,984,324  | rs6942789  | rs10256171 | 56     | 133,118  | HETDEL   | intergenic | 0       | yes        |
| 060426    | chr7  | 54,392,941  | 54,567,606  | rs1404665  | rs577570   | 28     | 174,666  | HETDEL   | intergenic | 4       | no         |
| 060426    | chr7  | 81,693,530  | 81,722,923  | rs10954669 | rs38559    | 13     | 29,394   | HETDEL   | intron     | 0       | no         |
| 060426    | chr7  | 105,870,604 | 105,937,636 | rs2704936  | rs17153267 | 20     | 67,033   | HETDEL   | intergenic | 0       | no         |
| 060426    | chr7  | 138,906,412 | 138,980,099 | rs6956628  | rs11979698 | 17     | 73,688   | HETDEL   | coding     | 0       | no         |

|        |       |             |             |            |            |     |         |        |            |    |     |
|--------|-------|-------------|-------------|------------|------------|-----|---------|--------|------------|----|-----|
| 060426 | chr8  | 9,452,106   | 9,659,969   | rs7013960  | rs6986755  | 37  | 207,864 | HETDEL | coding     | 0  | yes |
| 060426 | chr8  | 10,891,278  | 10,912,329  | rs7837828  | rs10087512 | 9   | 21,052  | HETDEL | coding     | 0  | yes |
| 060426 | chr9  | 5,039,065   | 5,203,687   | rs1328917  | rs10975003 | 33  | 164,623 | HETDEL | coding     | 0  | yes |
| 060426 | chr10 | 26,560,493  | 26,608,711  | rs8190645  | rs4144102  | 22  | 48,219  | HETDEL | coding     | 0  | no  |
| 060426 | chr10 | 49,511,555  | 49,556,819  | rs4838429  | rs6537571  | 10  | 45,265  | HETDEL | intergenic | 0  | no  |
| 060426 | chr10 | 54,194,664  | 54,201,241  | rs10450310 | rs1800450  | 9   | 6,578   | HETDEL | coding     | 0  | no  |
| 060426 | chr10 | 86,875,190  | 87,011,383  | rs17296623 | rs11201526 | 43  | 136,194 | HETDEL | intergenic | 0  | no  |
| 060426 | chr11 | 2,933,287   | 2,944,899   | rs11602817 | rs7124487  | 10  | 11,613  | HETDEL | coding     | 0  | yes |
| 060426 | chr11 | 63,407,501  | 63,530,946  | rs12271959 | rs10897471 | 19  | 123,446 | HETDEL | coding     | 1  | yes |
| 060426 | chr12 | 70,593,386  | 70,652,453  | rs17110391 | rs7963720  | 17  | 59,068  | HETDEL | coding     | 0  | yes |
| 060426 | chr14 | 44,150,945  | 44,372,831  | rs17115331 | rs12147665 | 45  | 221,887 | HETDEL | intergenic | 0  | yes |
| 060426 | chr16 | 6,278,695   | 6,288,493   | rs17220612 | rs11645065 | 10  | 9,799   | HETDEL | intergenic | 0  | no  |
| 060426 | chr18 | 60,441,471  | 60,528,062  | rs1506239  | rs10871573 | 32  | 86,592  | HETDEL | intergenic | 0  | no  |
| 060426 | chr18 | 72,035,716  | 72,127,143  | rs9945897  | rs11875168 | 17  | 91,428  | HETDEL | intergenic | 0  | no  |
| 060426 | chr19 | 36,725,286  | 36,762,404  | rs10164284 | rs10403928 | 10  | 37,119  | HETDEL | intergenic | 0  | no  |
| 060426 | chr20 | 24,046,673  | 24,093,833  | rs6036659  | rs6036670  | 20  | 47,161  | HETDEL | intergenic | 0  | no  |
| 060426 | chr21 | 14,087,640  | 14,197,852  | rs2258197  | rs7276618  | 11  | 110,213 | HETDEL | coding     | 36 | yes |
| 060426 | chr22 | 34,330,493  | 34,403,989  | rs4821422  | rs5755867  | 26  | 73,497  | HETDEL | coding     | 0  | no  |
| 060426 | chr6  | 168,078,127 | 168,340,401 | rs2340910  | rs9364232  | 133 | 262,275 | HETDUP | coding     | 0  | yes |

**Table S3. Exon Array Hybridizations (NCBI GEO Accession GSE13344)**

| <b>CEL file</b> | <b>Sample description</b>                                     | <b>Brain specimen</b> | <b>Age</b>         |
|-----------------|---------------------------------------------------------------|-----------------------|--------------------|
| Aud_18L.CEL     | temporal auditory neocortex, left, biological rep1            | 18 w.g., case 060426  | 18 weeks gestation |
| Aud_18R.CEL     | temporal auditory neocortex, right, biological rep1           | 18 w.g., case 060426  | 18 weeks gestation |
| CblIm_18NA.CEL  | cerebellum, biological rep1                                   | 18 w.g., case 060426  | 18 weeks gestation |
| DLPFC_18L.CEL   | dorsolateral prefrontal neocortex, left, biological rep1      | 18 w.g., case 060426  | 18 weeks gestation |
| DLPFC_18R.CEL   | dorsolateral prefrontal neocortex, right, biological rep1     | 18 w.g., case 060426  | 18 weeks gestation |
| Hipp_18L.CEL    | hippocampus, left, biological rep1                            | 18 w.g., case 060426  | 18 weeks gestation |
| Hipp_18R.CEL    | hippocampus, right, biological rep1                           | 18 w.g., case 060426  | 18 weeks gestation |
| MPFC_18L.CEL    | medial prefrontal neocortex, left, biological rep1            | 18 w.g., case 060426  | 18 weeks gestation |
| MPFC_18R.CEL    | medial prefrontal neocortex, right, biological rep1           | 18 w.g., case 060426  | 18 weeks gestation |
| MS_18L.CEL      | motor-somatosensory neocortex, left, biological rep1          | 18 w.g., case 060426  | 18 weeks gestation |
| MS_18R.CEL      | motor-somatosensory neocortex, right, biological rep1         | 18 w.g., case 060426  | 18 weeks gestation |
| Occ_18L.CEL     | occipital visual neocortex, left, biological rep1             | 18 w.g., case 060426  | 18 weeks gestation |
| Occ_18R.CEL     | occipital visual neocortex, right, biological rep1            | 18 w.g., case 060426  | 18 weeks gestation |
| Par_18L.CEL     | parietal association neocortex, left, biological rep1         | 18 w.g., case 060426  | 18 weeks gestation |
| Par_18R.CEL     | parietal association neocortex, right, biological rep1        | 18 w.g., case 060426  | 18 weeks gestation |
| Striat_18L.CEL  | striatum: putamen and caudate nucleus, left, biological rep1  | 18 w.g., case 060426  | 18 weeks gestation |
| Striat_18R.CEL  | striatum: putamen and caudate nucleus, right, biological rep1 | 18 w.g., case 060426  | 18 weeks gestation |
| Temp_18L.CEL    | temporal association cortex, left, biological rep1            | 18 w.g., case 060426  | 18 weeks gestation |
| Temp_18R.CEL    | temporal association cortex, right, biological rep1           | 18 w.g., case 060426  | 18 weeks gestation |
| Thal_18L.CEL    | mediodorsal thalamus, left, biological rep1                   | 18 w.g., case 060426  | 18 weeks gestation |
| Thal_18R.CEL    | mediodorsal thalamus, right, biological rep1                  | 18 w.g., case 060426  | 18 weeks gestation |
| VLPFC_18L.CEL   | ventrolateral prefrontal neocortex, left, biological rep1     | 18 w.g., case 060426  | 18 weeks gestation |
| VLPFC_18R.CEL   | ventrolateral prefrontal neocortex, right, biological rep1    | 18 w.g., case 060426  | 18 weeks gestation |
| Aud_19L.CEL     | temporal auditory neocortex, left, biological rep2            | 19 w.g., case 070404  | 19 weeks gestation |
| Aud_19R.CEL     | temporal auditory neocortex, right, biological rep2           | 19 w.g., case 070404  | 19 weeks gestation |
| CblIm_19L.CEL   | cerebellum, left, biological rep2                             | 19 w.g., case 070404  | 19 weeks gestation |
| CblIm_19R.CEL   | cerebellum, right, biological rep2                            | 19 w.g., case 070404  | 19 weeks gestation |
| DLPFC_19L.CEL   | dorsolateral prefrontal neocortex, left, biological rep2      | 19 w.g., case 070404  | 19 weeks gestation |
| DLPFC_19R.CEL   | dorsolateral prefrontal neocortex, right, biological rep2     | 19 w.g., case 070404  | 19 weeks gestation |
| Hipp_19L.CEL    | hippocampus, left, biological rep2                            | 19 w.g., case 070404  | 19 weeks gestation |
| Hipp_19R.CEL    | hippocampus, right, biological rep2                           | 19 w.g., case 070404  | 19 weeks gestation |
| MPFC_19L.CEL    | medial prefrontal neocortex, left, biological rep2            | 19 w.g., case 070404  | 19 weeks gestation |
| MPFC_19R.CEL    | medial prefrontal neocortex, right, biological rep2           | 19 w.g., case 070404  | 19 weeks gestation |
| MS_19L.CEL      | motor-somatosensory neocortex, left, biological rep2          | 19 w.g., case 070404  | 19 weeks gestation |
| MS_19R.CEL      | motor-somatosensory neocortex, right, biological rep2         | 19 w.g., case 070404  | 19 weeks gestation |
| Occ_19L.CEL     | occipital visual neocortex, left, biological rep2             | 19 w.g., case 070404  | 19 weeks gestation |
| Occ_19R.CEL     | occipital visual neocortex, right, biological rep2            | 19 w.g., case 070404  | 19 weeks gestation |
| Orbito_19L.CEL  | orbital prefrontal neocortex, left, biological rep2           | 19 w.g., case 070404  | 19 weeks gestation |
| Orbito_19R.CEL  | orbital prefrontal neocortex, right, biological rep2          | 19 w.g., case 070404  | 19 weeks gestation |
| Par_19L.CEL     | parietal association neocortex, left, biological rep2         | 19 w.g., case 070404  | 19 weeks gestation |
| Par_19R.CEL     | parietal association neocortex, right, biological rep2        | 19 w.g., case 070404  | 19 weeks gestation |
| Striat_19L.CEL  | striatum: putamen and caudate nucleus, left, biological rep2  | 19 w.g., case 070404  | 19 weeks gestation |
| Striat_19R.CEL  | striatum: putamen and caudate nucleus, right, biological rep2 | 19 w.g., case 070404  | 19 weeks gestation |
| Temp_19L.CEL    | temporal association cortex, left, biological rep2            | 19 w.g., case 070404  | 19 weeks gestation |
| Temp_19R.CEL    | temporal association cortex, right, biological rep2           | 19 w.g., case 070404  | 19 weeks gestation |
| Thal_19L.CEL    | mediodorsal thalamus, left, biological rep2                   | 19 w.g., case 070404  | 19 weeks gestation |
| Thal_19R.CEL    | mediodorsal thalamus, right, biological rep2                  | 19 w.g., case 070404  | 19 weeks gestation |
| VLPFC_19L.CEL   | ventrolateral prefrontal neocortex, left, biological rep2     | 19 w.g., case 070404  | 19 weeks gestation |
| VLPFC_19R.CEL   | ventrolateral prefrontal neocortex, right, biological rep2    | 19 w.g., case 070404  | 19 weeks gestation |
| Aud_21L.CEL     | temporal auditory neocortex, left, biological rep3            | 21 w.g., case 060118  | 21 weeks gestation |
| Aud_21R.CEL     | temporal auditory neocortex, right, biological rep3           | 21 w.g., case 060118  | 21 weeks gestation |
| CblIm_21NA.CEL  | cerebellum, biological rep3                                   | 21 w.g., case 060118  | 21 weeks gestation |
| DLPFC_21L.CEL   | dorsolateral prefrontal neocortex, left, biological rep3      | 21 w.g., case 060118  | 21 weeks gestation |
| DLPFC_21R.CEL   | dorsolateral prefrontal neocortex, right, biological rep3     | 21 w.g., case 060118  | 21 weeks gestation |
| Hipp_21L.CEL    | hippocampus, left, biological rep3                            | 21 w.g., case 060118  | 21 weeks gestation |
| Hipp_21R.CEL    | hippocampus, right, biological rep3                           | 21 w.g., case 060118  | 21 weeks gestation |
| MPFC_21L.CEL    | medial prefrontal neocortex, left, biological rep3            | 21 w.g., case 060118  | 21 weeks gestation |
| MPFC_21R.CEL    | medial prefrontal neocortex, right, biological rep3           | 21 w.g., case 060118  | 21 weeks gestation |
| MS_21L.CEL      | motor-somatosensory neocortex, left, biological rep3          | 21 w.g., case 060118  | 21 weeks gestation |
| MS_21R.CEL      | motor-somatosensory neocortex, right, biological rep3         | 21 w.g., case 060118  | 21 weeks gestation |
| Occ_21L.CEL     | occipital visual neocortex, left, biological rep3             | 21 w.g., case 060118  | 21 weeks gestation |
| Occ_21R.CEL     | occipital visual neocortex, right, biological rep3            | 21 w.g., case 060118  | 21 weeks gestation |
| Par_21L.CEL     | parietal association neocortex, left, biological rep3         | 21 w.g., case 060118  | 21 weeks gestation |
| Par_21R.CEL     | parietal association neocortex, right, biological rep3        | 21 w.g., case 060118  | 21 weeks gestation |
| Striat_21L.CEL  | striatum: putamen and caudate nucleus, left, biological rep3  | 21 w.g., case 060118  | 21 weeks gestation |
| Striat_21R.CEL  | striatum: putamen and caudate nucleus, right, biological rep3 | 21 w.g., case 060118  | 21 weeks gestation |
| Temp_21L.CEL    | temporal association cortex, left, biological rep3            | 21 w.g., case 060118  | 21 weeks gestation |
| Temp_21R.CEL    | temporal association cortex, right, biological rep3           | 21 w.g., case 060118  | 21 weeks gestation |
| Thal_21L.CEL    | mediodorsal thalamus, left, biological rep3                   | 21 w.g., case 060118  | 21 weeks gestation |
| Thal_21R.CEL    | mediodorsal thalamus, right, biological rep3                  | 21 w.g., case 060118  | 21 weeks gestation |
| VLPFC_21L.CEL   | ventrolateral prefrontal neocortex, left, biological rep3     | 21 w.g., case 060118  | 21 weeks gestation |

|                |                                                               |                      |                    |
|----------------|---------------------------------------------------------------|----------------------|--------------------|
| VLPFC_21R.CEL  | ventrolateral prefrontal neocortex, right, biological rep3    | 21 w.g., case 060118 | 21 weeks gestation |
| Aud_23L.CEL    | temporal auditory neocortex, left, biological rep4            | 23 w.g., case 051214 | 23 weeks gestation |
| Aud_23R.CEL    | temporal auditory neocortex, right, biological rep4           | 23 w.g., case 051214 | 23 weeks gestation |
| Cblm_23NA.CEL  | cerebellum, biological rep4                                   | 23 w.g., case 051214 | 23 weeks gestation |
| DLPFC_23L.CEL  | dorsolateral prefrontal neocortex, left, biological rep4      | 23 w.g., case 051214 | 23 weeks gestation |
| DLPFC_23R.CEL  | dorsolateral prefrontal neocortex, right, biological rep4     | 23 w.g., case 051214 | 23 weeks gestation |
| Hipp_23L.CEL   | hippocampus, left, biological rep4                            | 23 w.g., case 051214 | 23 weeks gestation |
| Hipp_23R.CEL   | hippocampus, right, biological rep4                           | 23 w.g., case 051214 | 23 weeks gestation |
| MPFC_23L.CEL   | medial prefrontal neocortex, left, biological rep4            | 23 w.g., case 051214 | 23 weeks gestation |
| MPFC_23R.CEL   | medial prefrontal neocortex, right, biological rep4           | 23 w.g., case 051214 | 23 weeks gestation |
| MS_23L.CEL     | motor-somatosensory neocortex, left, biological rep4          | 23 w.g., case 051214 | 23 weeks gestation |
| MS_23R.CEL     | motor-somatosensory neocortex, right, biological rep4         | 23 w.g., case 051214 | 23 weeks gestation |
| Occ_23L.CEL    | occipital visual neocortex, left, biological rep4             | 23 w.g., case 051214 | 23 weeks gestation |
| Occ_23R.CEL    | occipital visual neocortex, right, biological rep4            | 23 w.g., case 051214 | 23 weeks gestation |
| Par_23L.CEL    | parietal association neocortex, left, biological rep4         | 23 w.g., case 051214 | 23 weeks gestation |
| Par_23R.CEL    | parietal association neocortex, right, biological rep4        | 23 w.g., case 051214 | 23 weeks gestation |
| Striat_23L.CEL | striatum: putamen and caudate nucleus, left, biological rep4  | 23 w.g., case 051214 | 23 weeks gestation |
| Striat_23R.CEL | striatum: putamen and caudate nucleus, right, biological rep4 | 23 w.g., case 051214 | 23 weeks gestation |
| Temp_23L.CEL   | temporal association cortex, left, biological rep4            | 23 w.g., case 051214 | 23 weeks gestation |
| Temp_23R.CEL   | temporal association cortex, right, biological rep4           | 23 w.g., case 051214 | 23 weeks gestation |
| Thal_23L.CEL   | mediodorsal thalamus, left, biological rep4                   | 23 w.g., case 051214 | 23 weeks gestation |
| Thal_23R.CEL   | mediodorsal thalamus, right, biological rep4                  | 23 w.g., case 051214 | 23 weeks gestation |
| VLPFC_23L.CEL  | ventrolateral prefrontal neocortex, left, biological rep4     | 23 w.g., case 051214 | 23 weeks gestation |
| VLPFC_23R.CEL  | ventrolateral prefrontal neocortex, right, biological rep4    | 23 w.g., case 051214 | 23 weeks gestation |

**Table S4. Numbers of expressed and region-specific genes**

| <b>Total "core" transcript clusters (genes) tested: 17,421</b> |                           |                 |                                 |                 |
|----------------------------------------------------------------|---------------------------|-----------------|---------------------------------|-----------------|
| <b>Regional ANOVA</b>                                          | Number of genes expressed | % of core genes | Region-specific genes           | % of core genes |
| <b>Total</b>                                                   | <b>13,223</b>             | <b>75.9%</b>    |                                 |                 |
| NCTX                                                           | 8,876                     | 51.0%           | 659                             | 3.8%            |
| HIP                                                            | 9,586                     | 55.0%           | 114                             | 0.7%            |
| STR                                                            | 9,764                     | 56.0%           | 83                              | 0.5%            |
| THM                                                            | 9,866                     | 56.6%           | 135                             | 0.8%            |
| CBL                                                            | 10,020                    | 57.5%           | 316                             | 1.8%            |
| <b>DEX (FDR&lt;1E-5)</b>                                       | <b>4369</b>               | <b>25.1%</b>    | <b>(33% of genes expressed)</b> |                 |
| <b>DAS (FDR&lt;1E-5)</b>                                       | <b>3755</b>               | <b>21.6%</b>    | <b>(28% of genes expressed)</b> |                 |

  

| <b>NCTX ANOVA</b>        | Number of genes expressed | % of core genes | Region-specific genes             | % of core genes |
|--------------------------|---------------------------|-----------------|-----------------------------------|-----------------|
| <b>Total</b>             | <b>11,407</b>             | <b>65.5%</b>    |                                   |                 |
| OPFC                     | 10,135                    | 58.2%           | 457                               | 2.6%            |
| MPFC                     | 9,910                     | 56.9%           | 50                                | 0.3%            |
| DLPFC                    | 9,404                     | 54.0%           | 4                                 | 0.0%            |
| VLPFC                    | 9,721                     | 55.8%           | 6                                 | 0.0%            |
| MS                       | 9,812                     | 56.3%           | 26                                | 0.1%            |
| PAS                      | 9,549                     | 54.8%           | 1                                 | 0.0%            |
| TAS                      | 9,686                     | 55.6%           | 15                                | 0.1%            |
| TAU                      | 9,500                     | 54.5%           | 4                                 | 0.0%            |
| OCC                      | 9,497                     | 54.5%           | 21                                | 0.1%            |
| <b>DEX (FDR&lt;1E-5)</b> | <b>471</b>                | <b>2.7%</b>     | <b>(4.1% of genes expressed)</b>  |                 |
| <b>DAS (FDR&lt;1E-5)</b> | <b>496</b>                | <b>2.8%</b>     | <b>(4.3% of genes expressed)</b>  |                 |
| <b>DEX (FDR&lt;0.01)</b> | <b>1753</b>               | <b>10.1%</b>    | <b>(15.4% of genes expressed)</b> |                 |
| <b>DAS (FDR&lt;0.01)</b> | <b>828</b>                | <b>4.8%</b>     | <b>(7.3% of genes expressed)</b>  |                 |

  

| <b>PFC-grouped ANOVA</b> | Number of genes expressed | % of core genes | Region-specific genes             | % of core genes |
|--------------------------|---------------------------|-----------------|-----------------------------------|-----------------|
| <b>Total</b>             | <b>11,064</b>             | <b>63.5%</b>    |                                   |                 |
| PFC                      | 9,215                     | 52.9%           | 484                               | 2.8%            |
| MS                       | 9,487                     | 54.5%           | 73                                | 0.4%            |
| PAS                      | 9,260                     | 53.2%           | 14                                | 0.1%            |
| TAS                      | 9,135                     | 52.4%           | 41                                | 0.2%            |
| TAU                      | 9,344                     | 53.6%           | 13                                | 0.1%            |
| OCC                      | 9,123                     | 52.4%           | 43                                | 0.2%            |
| <b>DEX (FDR&lt;0.01)</b> | <b>1425</b>               | <b>8.2%</b>     | <b>(12.9% of genes expressed)</b> |                 |
| <b>DAS (FDR&lt;0.01)</b> | <b>827</b>                | <b>4.7%</b>     | <b>(7.5% of genes expressed)</b>  |                 |

  

| <b>Intra-PFC ANOVA</b>   | Number of genes expressed | % of core genes | Region-specific genes            | % of core genes |
|--------------------------|---------------------------|-----------------|----------------------------------|-----------------|
| <b>Total</b>             | <b>11,163</b>             | <b>64.1%</b>    |                                  |                 |
| OPFC                     | 10,061                    | 57.8%           | 491                              | 2.8%            |
| MPFC                     | 9,881                     | 56.7%           | 93                               | 0.5%            |
| DLPFC                    | 9,337                     | 53.6%           | 12                               | 0.1%            |
| VLPFC                    | 9,685                     | 55.6%           | 10                               | 0.1%            |
| MS                       | 9,763                     | 56.0%           | 52                               | 0.3%            |
| <b>DEX (FDR&lt;0.01)</b> | <b>233</b>                | <b>1.3%</b>     | <b>(2.1% of genes expressed)</b> |                 |
| <b>DAS (FDR&lt;0.01)</b> | <b>219</b>                | <b>1.3%</b>     | <b>(2.0% of genes expressed)</b> |                 |

**Table S5. Numbers of genes and correlations for clusters illustrated in Figures 2 and 3**

| <b>Figure 2</b>      | <b>Pearson correlation</b> | <b>Number of genes</b> | <b>% of genes clustered (total: 1964)</b> |
|----------------------|----------------------------|------------------------|-------------------------------------------|
| Cluster 1: Cortex    | 0.71                       | 109                    | 5.5%                                      |
| Cluster 1a: NCTX     | 0.76                       | 52                     | 2.6%                                      |
| Cluster 1b: NCTX+HIP | 0.78                       | 57                     | 2.9%                                      |
| Cluster 2: HIP       | 0.80                       | 109                    | 5.5%                                      |
| Cluster 3: STR       | 0.80                       | 105                    | 5.3%                                      |
| Cluster 4: THM       | 0.80                       | 137                    | 7.0%                                      |
| Cluster 5: CBL       | 0.81                       | 140                    | 7.1%                                      |

  

| <b>Figure 3a: NCTX</b> | <b>Pearson correlation</b> | <b>Number of genes</b> | <b>% of genes clustered (total: 1425)</b> |
|------------------------|----------------------------|------------------------|-------------------------------------------|
| Cluster 1: PFC (+MS)   | 0.91                       | 29                     | 2.0%                                      |
| Cluster 2: PFC (+TAS)  | 0.82                       | 28                     | 2.0%                                      |
| Cluster 3: Non-Frontal | 0.86                       | 18                     | 1.3%                                      |
| Cluster 4: TAU+TAS     | 0.90                       | 25                     | 1.8%                                      |
| Cluster 5: PFC+TAS     | 0.89                       | 15                     | 1.1%                                      |
| Cluster 6: OCC         | 0.82                       | 11                     | 0.8%                                      |

  

| <b>Figure 3b: Frontal Cortex</b> | <b>Pearson correlation</b> | <b>Number of genes</b> | <b>% of genes clustered (total: 233)</b> |
|----------------------------------|----------------------------|------------------------|------------------------------------------|
| Cluster 1: PFC > MS              | 0.81                       | 10                     | 4.3%                                     |
| Cluster 2: OPFC                  | 0.94                       | 5                      | 2.1%                                     |
| Cluster 3: OPFC+DLPFC+VLPFC      | 0.89                       | 11                     | 4.7%                                     |
| Cluster 4: MPFC                  | 0.87                       | 13                     | 5.6%                                     |
| Cluster 5: MPFC+MS               | 0.85                       | 13                     | 5.6%                                     |
| Cluster 6: VLPFC+MS              | 0.88                       | 11                     | 4.7%                                     |

Table S6. Gene lists for clusters illustrated in Figure 2

| Cluster 1a: NCTX      |                      |                                                                                               |              |                |                  |               | OMIM and Genetic Association Database annotations |                                          |                                                                                                                |
|-----------------------|----------------------|-----------------------------------------------------------------------------------------------|--------------|----------------|------------------|---------------|---------------------------------------------------|------------------------------------------|----------------------------------------------------------------------------------------------------------------|
| Transcript Cluster ID | Official Gene Symbol | Gene Name                                                                                     | Confirmation | Cytoband       | RefSeq Accession | Entrez GeneID | Maximum Fold Change                               | corrected p-value (False Discovery Rate) | Numbered annotations refer to OMIM; references are retrieved from the NCBI GAD at geneticassociationdb.nih.gov |
| 2381177               | MARK1                | MAP/microtubule affinity-regulating kinase 1                                                  |              | 1q41           | NM_018650        | 4139          | 2.4                                               | 6.1E-14                                  |                                                                                                                |
| 2413685               | SSBP3                | single stranded DNA binding protein 3                                                         |              | 1p32.3         | NM_001009955     | 23648         | 2.0                                               | 3.0E-17                                  |                                                                                                                |
| 2420521               | SSX2IP               | synovial sarcoma X breakpoint 2 interacting protein                                           |              | 1p22.3         | NM_014021        | 117178        | 2.9                                               | 8.4E-15                                  |                                                                                                                |
| 2566848               | AF3F                 | AF4/FMR2 family member 3                                                                      |              | 2q11.2-q12     | NM_002285        | 3899          | 3.1                                               | 5.7E-31                                  |                                                                                                                |
| 2581726               | RPRM                 | represso TP53 dependent G2 arrest mediator candidate                                          | qRT-PCR, ISH | 2q23.3         | NM_019845        | 56475         | 4.9                                               | 3.3E-22                                  |                                                                                                                |
| 2594089               | SATB2                | SATB homeobox 2                                                                               | IHC          | 2q23           | NM_015265        | 23314         | 17.1                                              | 7.4E-58                                  |                                                                                                                |
| 2642995               | TMEM108              | transmembrane protein 108                                                                     |              | 3q21           | NM_023943        | 68000         | 4.2                                               | 4.7E-38                                  |                                                                                                                |
| 2657967               | OSTN                 | osteonin                                                                                      |              | 3q28           | NM_198184        | 344901        | 2.1                                               | 2.5E-07                                  |                                                                                                                |
| 2727116               | RASL11B              | RAS-like family 11 member B                                                                   |              | 4q12           | NM_023940        | 65997         | 3.9                                               | 2.9E-19                                  |                                                                                                                |
| 2761842               | PROM1                | prominin 1                                                                                    |              | 4p15.32        | NM_006017        | 8842          | 2.5                                               | 4.0E-11                                  |                                                                                                                |
| 2776998               | KLHL8                | kelch-like 8 (Drosophila)                                                                     |              | 4q22.1         | NM_020803        | 441028        | 2.1                                               | 2.4E-13                                  |                                                                                                                |
| 2866225               | MEF2C                | myocyte enhancer factor 2C                                                                    |              | 5q14           | NM_002397        | 4208          | 6.2                                               | 1.7E-36                                  |                                                                                                                |
| 2890517               | RASGEF1C             | RasGEF domain family member 1C                                                                |              | 5q35.3         | NM_001031799     | 255426        | 2.3                                               | 1.7E-20                                  |                                                                                                                |
| 2918388               | POU3F2               | POU domain class 3 transcription factor 2                                                     | IHC          | 6q16           | NM_005604        | 5454          | 6.7                                               | 4.9E-25                                  |                                                                                                                |
| 2924081               | TCBA1                | T-cell lymphoma breakpoint associated target 1                                                |              | 6q21           | NM_001040214     | 154215        | 4.0                                               | 4.0E-31                                  |                                                                                                                |
| 2925724               | AKAP7                | A kinase (PRKA) anchor protein 7                                                              |              | 6q23           | NM_016377        | 9465          | 2.2                                               | 2.3E-06                                  |                                                                                                                |
| 2939298               | C6orf85              | chromosome 6 open reading frame 85                                                            | qRT-PCR      | 6p25.2         | NM_021945        | 63027         | 2.1                                               | 9.7E-24                                  |                                                                                                                |
| 2964553               | BACH2                | BTB and CNC homology 1 basic leucine zipper transcription factor 2                            | qRT-PCR      | 6q15           | NM_021813        | 60468         | 2.8                                               | 3.1E-30                                  |                                                                                                                |
| 3018605               | SLC26A4              | solute carrier family 26 member 4                                                             |              | 7q31           | NM_000441        | 5172          | 3.0                                               | 4.7E-23                                  |                                                                                                                |
| 3025005               | EXOC4                | exocyst complex component 4                                                                   |              | 7q31           | NM_021807        | 60412         | 2.1                                               | 1.2E-19                                  |                                                                                                                |
| 3028958               | EPHB6                | EPH receptor B6                                                                               | qRT-PCR      | 7q33-q35       | NM_004445        | 2051          | 2.9                                               | 6.4E-17                                  |                                                                                                                |
| 3043648               | CPVL                 | carboxypeptidase vitellogenic-like                                                            | qRT-PCR      | 7p15-p14       | NM_019029        | 54504         | 2.5                                               | 1.7E-06                                  |                                                                                                                |
| 3059464               | SEMA3A               | sema domain immunoglobulin domain (Ig) short basic domain secreted (semaphorin) 3A            | IHC          | 7p12.1         | NM_006090        | 10371         | 3.7                                               | 2.2E-26                                  |                                                                                                                |
| 3087501               | ZDHHC2               | zinc finger DHHC-type containing 2                                                            |              | 8p21.3-p22     | NM_016353        | 51201         | 2.4                                               | 1.3E-08                                  |                                                                                                                |
| 3088486               | LPL                  | lipoprotein lipase                                                                            |              | 8p22           | NM_000237        | 4023          | 6.3                                               | 1.3E-18                                  | Alzheimer's Disease (Baum, L et al. 2000)                                                                      |
| 3093526               | UNC5D                | unc-5 homolog D (C. elegans)                                                                  |              | 8p12           | NM_080872        | 137970        | 2.8                                               | 2.8E-14                                  |                                                                                                                |
| 3117384               | KHDRBS3              | KH domain containing RNA binding signal transduction associated 3                             |              | 8q24.2         | NM_006558        | 10656         | 2.4                                               | 2.3E-14                                  |                                                                                                                |
| 3148963               | KCNV1                | potassium channel subfamily V member 1                                                        |              | 8q22.3-q24.1   | NM_014379        | 27012         | 4.4                                               | 7.9E-25                                  | epilepsy (Chen, Y. C. et al. 2003)                                                                             |
| 3154263               | SLA                  | Src-like-adapter                                                                              |              | 8q22.3-qter    | NM_006748        | 6503          | 18.7                                              | 7.9E-70                                  |                                                                                                                |
| 3159946               | SMARCA2              | SWI/SNF related matrix associated actin dependent regulator of chromatin subfamily a member 2 |              | 8p22.3         | NM_003070        | 6595          | 2.5                                               | 4.4E-14                                  |                                                                                                                |
| 3174967               | RORB                 | RAR-related orphan receptor B                                                                 | qRT-PCR      | 8p22.3         | NM_006914        | 6096          | 3.1                                               | 1.2E-24                                  |                                                                                                                |
| 3200982               | MLLT3                | myeloid/lymphoid or mixed-lineage leukemia (trithorax homolog Drosophila); translocated to 3  |              | 8p22           | NM_004529        | 4300          | 2.1                                               | 4.8E-14                                  |                                                                                                                |
| 3254521               | TSPAN14              | tetraspanin 14                                                                                |              | 10q23.1        | NM_030927        | 81619         | 2.1                                               | 3.6E-18                                  |                                                                                                                |
| 3258384               | CYP26A1              | cytochrome P450 family 26 subfamily A polypeptide 1                                           |              | 10q23-q24      | NM_057157        | 1592          | 2.1                                               | 6.4E-16                                  |                                                                                                                |
| 3264059               | ADRA2A               | adrenergic alpha-2A- receptor                                                                 |              | 10q24-q26      | NM_000681        | 150           | 6.4                                               | 3.7E-36                                  | suicide (Sequeira, A. et al. 2004)                                                                             |
| 3385509               | FZD4                 | frizzled homolog 4 (Drosophila)                                                               |              | 11q14.2        | NM_012193        | 8322          | 3.1                                               | 2.4E-24                                  |                                                                                                                |
| 3447348               | SOX5                 | SRY (sex determining region Y)-box 5                                                          | IHC          | 12p12.1        | NM_006940        | 6660          | 5.6                                               | 2.1E-31                                  |                                                                                                                |
| 3459722               | AVPR1A               | arginine vasopressin receptor 1A                                                              |              | 12q14-q15      | NM_000706        | 552           | 2.3                                               | 2.9E-17                                  |                                                                                                                |
| 3517051               | KLHL1                | kelch-like 1 (Drosophila)                                                                     | qRT-PCR*     | 13q21          | NM_020866        | 57626         | 5.7                                               | 1.0E-33                                  | autism (Yirmiya, N. et al., 2006)                                                                              |
| 3538087               | DACT1                | dapper antagonist of beta-catenin homolog 1 (Xenopus laevis)                                  | qRT-PCR      | 14q23.1        | NM_016651        | 51339         | 5.0                                               | 3.3E-31                                  |                                                                                                                |
| 3551485               | EML1                 | echinoderm microtubule associated protein like 1                                              |              | 14q32          | NM_001008707     | 2009          | 4.8                                               | 2.8E-45                                  |                                                                                                                |
| 3566495               | C14orf37             | chromosome 14 open reading frame 37                                                           | qRT-PCR      | 14q23.1        | NM_001001872     | 145407        | 2.0                                               | 6.8E-15                                  |                                                                                                                |
| 3567873               | KCNH5                | potassium voltage-gated channel subfamily H (eag-related) member 5                            |              | 14q23.1        | NM_172376        | 27133         | 2.3                                               | 4.2E-09                                  |                                                                                                                |
| 3605268               | TMS6F1               | transmembrane 6 superfamily member 1                                                          |              | 15q24-q26      | NM_023003        | 53346         | 2.3                                               | 1.2E-09                                  |                                                                                                                |
| 3635737               | RKHD3                | ring finger and KH domain containing 3                                                        | qRT-PCR      | 15q25.2        | NM_032246        | 84206         | 2.3                                               | 4.5E-20                                  |                                                                                                                |
| 3759335               | GJA7                 | gap junction protein alpha 7 45kDa                                                            |              | 17q21.31       | NM_001080383     | 10052         | 2.8                                               | 2.3E-25                                  |                                                                                                                |
| 3790529               | GRP                  | gastrin-releasing peptide                                                                     |              | 18q21.1-q21.32 | NM_001012512     | 2922          | 3.1                                               | 1.4E-08                                  |                                                                                                                |
| 3811339               | BCL2                 | B-cell CLL/lymphoma 2                                                                         |              | 18q21.33       | NM_000657        | 596           | 2.4                                               | 1.5E-10                                  |                                                                                                                |
| 3858285               | TSHZ3                | teashirt family zinc finger 3                                                                 | qRT-PCR      | 19q12          | NM_020856        | 57616         | 7.1                                               | 1.8E-34                                  |                                                                                                                |
| 3889833               | DOK5                 | docking protein 5                                                                             | qRT-PCR      | 20q13.2        | NM_018431        | 55816         | 9.2                                               | 1.9E-38                                  |                                                                                                                |
| 3962839               | SCUBE1               | signal peptide CUB domain EGF-like 1                                                          |              | 22q13          | NM_173050        | 80274         | 5.1                                               | 3.7E-42                                  |                                                                                                                |
| 3969633               | GLRA2                | glycine receptor alpha 2                                                                      |              | Xp22.1-p21.3   | NM_002063        | 2742          | 2.6                                               | 8.9E-20                                  |                                                                                                                |

  

| Cluster 1b: NCTX+HIP (Cortex) |                      |                                                                                          |              |              |                  |               | OMIM and Genetic Association Database annotations |                                |                                                                                                                |
|-------------------------------|----------------------|------------------------------------------------------------------------------------------|--------------|--------------|------------------|---------------|---------------------------------------------------|--------------------------------|----------------------------------------------------------------------------------------------------------------|
| Transcript Cluster ID         | Official Gene Symbol | Gene Name                                                                                | Confirmation | Cytoband     | RefSeq Accession | Entrez GeneID | Maximum Fold Change                               | p-value (False Discovery Rate) | Numbered annotations refer to OMIM; references are retrieved from the NCBI GAD at geneticassociationdb.nih.gov |
| 2991395                       | HDAC9                | histone deacetylase 9                                                                    |              | 7p21.1       | NM_178425        | 9734          | 2.5                                               | 2.2E-18                        |                                                                                                                |
| 2977265                       | HIVEP2               | human immunodeficiency virus type 1 enhancer binding protein 2                           |              | 6q23-q24     | NM_006734        | 3097          | 3.0                                               | 7.0E-14                        |                                                                                                                |
| 3058759                       | SEMA3C               | sema domain immunoglobulin domain (Ig) short basic domain secreted (semaphorin) 3C       |              | 7q21-q31     | NM_006379        | 10512         | 6.4                                               | 1.6E-22                        |                                                                                                                |
| 3940631                       | YES1                 | y-yes-1 Yamaguchi sarcoma viral oncogene homolog 1                                       |              | 22q11        | NM_005433        | 157           | 2.5                                               | 8.0E-11                        |                                                                                                                |
| 2707045                       | PEX5L                | peroxisomal biogenesis factor 5-like                                                     |              | 3q26.33      | NM_016559        | 51555         | 4.3                                               | 8.0E-32                        |                                                                                                                |
| 2805635                       | NPR3                 | natriuretic peptide receptor C/guanylate cyclase C (atrionatriuretic peptide receptor C) |              | 5p14-p13     | NM_000908        | 4883          | 3.7                                               | 1.3E-21                        |                                                                                                                |
| 2679377                       | FEZF2                | FEZ family zinc finger 2                                                                 | ISH          | 3p14.2       | NM_018008        | 55079         | 10.7                                              | 2.1E-41                        |                                                                                                                |
| 3013565                       | DYNC111              | dynein cytoplasmic 1 intermediate chain 1                                                |              | 7q21.3-q22.1 | NM_004411        | 1780          | 6.7                                               | 5.1E-31                        |                                                                                                                |
| 3059393                       | SEMA3E               | sema domain immunoglobulin domain (Ig) short basic domain secreted (semaphorin) 3E       |              | 7q21.11      | NM_012431        | 9723          | 3.1                                               | 2.0E-13                        |                                                                                                                |
| 3970714                       | PPEF1                | protein phosphatase EF-hand calcium binding domain 1                                     |              | Xp22.2-p22.1 | NM_152224        | 5475          | 3.4                                               | 2.2E-16                        |                                                                                                                |
| 3041294                       | FAM126A              | family with sequence similarity 126 member A                                             |              | 7p15.3       | NM_032581        | 84668         | 3.6                                               | 3.3E-23                        |                                                                                                                |
| 3436117                       | DNAH10               | dynein axonemal heavy chain 10                                                           |              | 12q24.31     | NM_207437        | 196385        | 2.3                                               | 3.8E-18                        |                                                                                                                |
| 2582124                       | NR4A2                | nuclear receptor subfamily 4 group A member 2                                            | qRT-PCR      | 2q22-q23     | NM_006186        | 4929          | 6.6                                               | 9.5E-20                        | schizophrenia (Chen, Y. H. et al. 2001)                                                                        |
| 2512752                       | TBR1                 | T-box brain 1                                                                            | IHC          | 2q24         | NM_006593        | 10716         | 22.7                                              | 5.9E-57                        |                                                                                                                |
| 3436082                       | DNAH10               | dynein axonemal heavy chain 10                                                           |              | 12q24.31     | NM_207437        | 196385        | 3.2                                               | 1.5E-20                        |                                                                                                                |
| 2348437                       | SNX7                 | sorting nexin 7                                                                          |              | 1p21.3       | NM_015976        | 51375         | 4.3                                               | 5.1E-21                        |                                                                                                                |
| 2896888                       | CAP2                 | CAP adenylate cyclase-associated protein 2 (yeast)                                       |              | 6p22.3       | NM_006366        | 10486         | 2.5                                               | 1.1E-19                        |                                                                                                                |



|         |                |                                                                                        |              |                 |              |        |      |         |  |
|---------|----------------|----------------------------------------------------------------------------------------|--------------|-----------------|--------------|--------|------|---------|--|
| 3605395 | ADAMTSL3       | ADAMTS-like 3                                                                          |              | 15q25.2         | NM_207517    | 57188  | 3.0  | 9.0E-31 |  |
| 3389976 | SLC35F2        | solute carrier family 35 member F2                                                     |              | 11q22.3         | NM_017515    | 54733  | 3.0  | 7.3E-19 |  |
| 3807595 | MYO5B          | myosin VB                                                                              |              | 9q12            | NM_001080467 | 392335 | 3.4  | 1.4E-17 |  |
| 3803290 | FAM59A         | family with sequence similarity 59 member A                                            |              | 18q12.1         | NM_022751    | 64762  | 2.8  | 2.2E-22 |  |
| 2725061 | DKFZP686A01247 | hypothetical protein                                                                   | qRT-PCR      | 4p13            | NM_014988    | 22998  | 3.8  | 3.0E-27 |  |
| 2449104 | B3GALT2        | UDP-Gal:betaGalNAc beta 1 3-galactosyltransferase polypeptide 2                        |              | 1q31            | NM_003783    | 8707   | 2.2  | 2.0E-11 |  |
| 3039671 | SOSTDC1        | sclerostin domain containing 1                                                         |              | 7p21.1          | NM_015464    | 25928  | 3.3  | 3.4E-15 |  |
| 2789957 | FBXW7          | F-box and WD repeat domain containing 7                                                |              | 7               | NM_001013415 | 402521 | 3.1  | 2.0E-17 |  |
| 3799461 | SPIRE1         | spire homolog 1 (Drosophila)                                                           |              | 18p11.21        | NM_020148    | 56907  | 3.2  | 2.4E-28 |  |
| 3451814 | NELL2          | NEL-like 2 (chicken)                                                                   |              | 12q13.11-q13.12 | NM_006159    | 4753   | 2.9  | 6.5E-26 |  |
| 2895792 | RNF182         | ring finger protein 182                                                                | qRT-PCR      | 6p23            | NM_152737    | 221687 | 4.9  | 3.0E-19 |  |
| 3323052 | NAV2           | neuron navigator 2                                                                     | qRT-PCR      | 11p14.3         | NM_145117    | 89797  | 3.3  | 1.3E-23 |  |
| 3147286 | RRM2B          | ribonucleotide reductase M2 B (TP53 inducible)                                         |              | 8q23.1          | NM_015713    | 50484  | 2.4  | 9.9E-14 |  |
| 2742581 | FAT4           | FAT tumor suppressor homolog 4 (Drosophila)                                            |              | 4q28.1          | NM_024582    | 79633  | 4.7  | 2.0E-31 |  |
| 2910779 | C6orf142       | chromosome 6 open reading frame 142                                                    |              | 6p12.1          | NM_138569    | 90523  | 3.0  | 2.9E-10 |  |
| 2579439 | GTDC1          | glycosyltransferase-like domain containing 1                                           |              | 2q23.1          | NM_001006636 | 79712  | 4.1  | 4.8E-26 |  |
| 3867842 | SLC17A7        | solute carrier family 17 (sodium-dependent inorganic phosphate cotransporter) member 7 |              | 19q13           | NM_020309    | 57030  | 6.5  | 1.8E-30 |  |
| 2924851 | RSPO3          | R-spondin 3 homolog (Xenopus laevis)                                                   |              | 6q22.33         | NM_032784    | 84870  | 4.2  | 2.4E-29 |  |
| 2930418 | UST            | uronyl-2-sulfotransferase                                                              |              | 6q25.1          | NM_005715    | 10090  | 2.5  | 1.1E-15 |  |
| 2778856 | TSPAN5         | tetraspanin 5                                                                          | qRT-PCR      | 4q23            | NM_005723    | 10098  | 2.1  | 2.7E-21 |  |
| 3822122 | NFIX           | nuclear factor I/X (CCAAT-binding transcription factor)                                | qRT-PCR      | 19p13.3         | NM_002501    | 4784   | 6.0  | 1.6E-26 |  |
| 2665199 | SATB1          | SATB homeobox 1                                                                        |              | 3p23            | NM_002971    | 6304   | 2.8  | 7.7E-16 |  |
| 2633256 | ST3GAL6        | ST3 beta-galactoside alpha-2 3-sialyltransferase 6                                     |              | 3q12.1          | NM_006100    | 10402  | 2.5  | 1.9E-11 |  |
| 3150715 | DCC1           | defective in sister chromatid cohesion homolog 1 (S. cerevisiae)                       |              | 8q24.12         | NM_024094    | 79075  | 2.0  | 2.6E-11 |  |
| 3044518 | NEUROD6        | neurogenic differentiation 6                                                           |              | 7p15.1          | NM_022728    | 63974  | 47.0 | 1.0E-55 |  |
| 3755790 | NEUROD2        | neurogenic differentiation 2                                                           |              | 17p13.1         | NM_006160    | 4761   | 30.9 | 1.9E-48 |  |
| 2782267 | NEUROG2        | neurogenin 2                                                                           |              | 4q25            | NM_024019    | 63973  | 3.2  | 5.6E-14 |  |
| 3589458 | THBS1          | thrombospondin 1                                                                       | qRT-PCR, ISH | 15q15           | NM_003246    | 7057   | 7.5  | 2.8E-16 |  |
| 2388794 | ZNF238         | zinc finger protein 238                                                                | qRT-PCR      | 1q44-qter       | NM_205768    | 10472  | 11.3 | 3.9E-43 |  |
| 3829471 | KCTD15         | potassium channel tetramerisation domain containing 15                                 |              | 19q13.11        | NM_024076    | 79047  | 2.3  | 2.7E-22 |  |
| 3070873 | GPR37          | G protein-coupled receptor 37 (endothelin receptor type B-like)                        |              | 7q31            | NM_005302    | 2861   | 3.3  | 1.0E-19 |  |
| 4038415 | GALNAC4S-6ST   | B cell RAG associated protein                                                          |              | 10q26           | NM_015892    | 51363  | 7.4  | 1.1E-34 |  |
| 3268940 | GALNAC4S-6ST   | B cell RAG associated protein                                                          |              | 10q26           | NM_015892    | 51363  | 7.6  | 1.9E-33 |  |
| 3181240 | TMOD1          | tropomodulin 1                                                                         | qRT-PCR, ISH | 9q22.3          | NM_003275    | 7111   | 6.8  | 7.6E-29 |  |
| 2381249 | C1orf115       | chromosome 1 open reading frame 115                                                    |              | 1q41            | NM_024709    | 79762  | 3.0  | 2.1E-25 |  |
| 3463056 | CSRP2          | cysteine and glycine-rich protein 2                                                    |              | 12q21.1         | NM_001321    | 1466   | 5.4  | 1.7E-19 |  |
| 2973376 | PTPRK          | protein tyrosine phosphatase receptor type K                                           |              | 6q22.2-23.1     | NM_002844    | 5796   | 4.1  | 1.9E-18 |  |
| 2961177 | COL12A1        | collagen type XII alpha 1                                                              |              | 6q12-q13        | NM_004370    | 1303   | 2.4  | 4.4E-18 |  |
| 2867443 | MCTP1          | multiple C2 domains transmembrane 1                                                    |              | 5q15            | NM_024717    | 79772  | 2.8  | 3.5E-13 |  |
| 2777487 | FAM13A1        | family with sequence similarity 13 member A1                                           |              | 4q22.1          | NM_014883    | 10144  | 3.6  | 5.8E-26 |  |

**Cluster 2: HIP**

**Exon Array**

| Transcript Cluster ID | Official Gene Symbol | Gene Name                                                              | Confirmation | Cytoband     | RefSeq Accession | Entrez GeneID | Maximum Fold Change | p-value (False Discovery Rate) | OMIM and Genetic Association Database annotations            |
|-----------------------|----------------------|------------------------------------------------------------------------|--------------|--------------|------------------|---------------|---------------------|--------------------------------|--------------------------------------------------------------|
| 2487963               | ANKRD53              | ankyrin repeat domain 53                                               |              | 2p13.3       | NM_024933        | 79998         | 2.0                 | 1.1E-09                        |                                                              |
| 3472183               | RASAL1               | RAS protein activator like 1 (GAP1 like)                               |              | 12q23-q24    | NM_004658        | 8437          | 2.9                 | 1.4E-11                        |                                                              |
| 2648991               | KCNAB1               | potassium voltage-gated channel shaker-related subfamily beta member 1 |              | 3q26.1       | NM_003471        | 7881          | 3.4                 | 3.1E-17                        |                                                              |
| 2689516               | ZBTB20               | zinc finger and BTB domain containing 20                               | qRT-PCR      | 3q13.2       | NM_015642        | 26137         | 10.4                | 2.4E-29                        |                                                              |
| 2992243               | DNAH11               | dynein axonemal heavy chain 11                                         |              | 7p21         | NM_003777        | 8701          | 2.0                 | 5.0E-25                        | 242650; 603339; Kartagener syndrome; Situs inversus viscerum |
| 3731826               | PRKCA                | protein kinase C alpha                                                 |              | 17q22-q23.2  | NM_002737        | 5578          | 2.2                 | 8.0E-08                        | 176960; Pituitary tumor, invasive                            |
| 3509677               | SOHLH2               | spermatogenesis and oogenesis specific basic helix-loop-helix 2        |              | 13q13.3      | BC037403         | 54937         | 2.5                 | 1.2E-08                        |                                                              |
| 2378019               | CAMK1G               | calcium/calmodulin-dependent protein kinase IG                         |              | 1q32-q41     | NM_020439        | 57172         | 2.1                 | 6.4E-09                        |                                                              |
| 2816536               | CRHBP                | corticotropin releasing hormone binding protein                        |              | 5q11.2-q13.3 | NM_001882        | 1393          | 2.9                 | 3.5E-18                        | major depression (Claes S 2003)                              |
| 3134468               | EFCAB1               | EF-hand calcium binding domain 1                                       |              | 8q11.21      | NM_024593        | 79645         | 2.4                 | 2.9E-11                        |                                                              |
| 3332964               | C11orf66             | chromosome 11 open reading frame 66                                    |              | 11q12.2      | NM_145017        | 220004        | 2.0                 | 3.1E-12                        |                                                              |
| 3516228               | PCDH20               | protocadherin 20                                                       | qRT-PCR      | 13q21        | NM_022843        | 64881         | 5.4                 | 5.6E-23                        |                                                              |
| 2816298               | IQGAP2               | IQ motif containing GTPase activating protein 2                        |              | 5q13.3       | NM_006633        | 10788         | 2.2                 | 1.1E-07                        |                                                              |
| 3430620               | WSCD2                | WSC domain containing 2                                                |              | 12q23.3      | NM_014653        | 9671          | 2.7                 | 1.0E-22                        |                                                              |
| 4018729               | IL13RA2              | interleukin 13 receptor alpha 2                                        |              | Xq13.1-q28   | NM_000640        | 3598          | 3.2                 | 1.2E-17                        |                                                              |
| 2414440               | C1orf168             | chromosome 1 open reading frame 168                                    |              | 1p32.2       | NM_001004303     | 199920        | 2.4                 | 4.8E-29                        |                                                              |
| 2906333               | DAAM2                | dishevelled associated activator of morphogenesis 2                    |              | 6p21.2       | NM_015345        | 23500         | 2.7                 | 4.5E-19                        |                                                              |
| 2430422               | SPAG17               | sperm associated antigen 17                                            |              | 1p12         | NM_206996        | 200162        | 2.1                 | 3.7E-24                        |                                                              |
| 3671607               | LRRC50               | leucine rich repeat containing 50                                      | qRT-PCR      | 16q24.1      | NM_178452        | 123872        | 2.5                 | 2.1E-25                        |                                                              |
| 2524301               | NRP2                 | neuropilin 2                                                           |              | 2q33.3       | NM_201279        | 8828          | 2.8                 | 3.3E-09                        | autism (Wu, S. et al. 2007)                                  |
| 2473831               | C2orf39              | chromosome 2 open reading frame 39                                     |              | 2p23.3       | NM_145038        | 92749         | 2.0                 | 1.1E-22                        |                                                              |
| 2801694               | ROPN1L               | roporin 1-like                                                         |              | 5p15.2       | NM_031916        | 83853         | 2.7                 | 7.3E-24                        |                                                              |
| 2886174               | SLIT3                | slit homolog 3 (Drosophila)                                            |              | 5q35         | NM_003062        | 6586          | 2.8                 | 1.5E-20                        |                                                              |
| 3098977               | LYN                  | v-src-1 Yamaguchi sarcoma viral related oncogene homolog               |              | 8q13         | NM_002350        | 4067          | 3.1                 | 2.5E-13                        |                                                              |
| 2323899               | UBXD3                | UBX domain containing 3                                                |              | 1p36.12      | NM_152376        | 127733        | 2.0                 | 1.2E-06                        |                                                              |
| 3294361               | TTC18                | tetratricopeptide repeat domain 18                                     |              | 10q22.2      | NM_145170        | 118491        | 2.3                 | 5.1E-24                        |                                                              |
| 3362159               | NRIP3                | nuclear receptor interacting protein 3                                 |              | 11p15.3      | NM_020645        | 56675         | 4.5                 | 2.7E-19                        |                                                              |
| 2931700               | C6orf97              | chromosome 6 open reading frame 97                                     |              | 6q25.1       | NM_025059        | 80129         | 2.2                 | 8.1E-14                        |                                                              |
| 2340819               | TCTEX1D1             | Tctex1 domain containing 1                                             |              | 1p31.3       | NM_152665        | 200132        | 2.8                 | 1.3E-22                        |                                                              |
| 2417016               | WDR78                | WD repeat domain 78                                                    |              | 1p31.3       | NM_024763        | 79819         | 2.0                 | 1.8E-17                        |                                                              |
| 3695631               | TPPP3                | tubulin polymerization-promoting protein family member 3               |              | 16q22.1      | NM_016140        | 51673         | 6.0                 | 3.8E-19                        |                                                              |
| 3634811               | CTSH                 | cathepsin H                                                            |              | 15q24-q25    | NM_004390        | 1512          | 2.1                 | 1.3E-14                        |                                                              |
| 3361381               | CYB5R2               | cytochrome b5 reductase 2                                              |              | 11p15.4      | NM_016229        | 51700         | 2.2                 | 1.4E-07                        |                                                              |
| 3797032               | EPB41L3              | erythrocyte membrane protein band 4.1-like 3                           |              | 18p11.32     | NM_012307        | 23136         | 2.5                 | 8.2E-11                        |                                                              |
| 7385641               | CLSTN2               | calsynin 2                                                             | qRT-PCR, ISH | 3q23-q24     | NM_022131        | 64084         | 5.2                 | 3.8E-15                        |                                                              |
| 2329196               | ADC                  | arginine decarboxylase                                                 |              | 1p33-p34.3   | NM_052998        | 113451        | 2.3                 | 3.3E-09                        |                                                              |
| 2967276               | POPDC3               | popeye domain containing 3                                             |              | 6q21         | NM_022361        | 64208         | 3.2                 | 4.2E-07                        |                                                              |

|         |           |                                                                               |              |              |        |     |         |                                                |
|---------|-----------|-------------------------------------------------------------------------------|--------------|--------------|--------|-----|---------|------------------------------------------------|
| 2518272 | ITGA4     | integrin alpha 4 (antigen CD49D alpha 4 subunit of VLA-4 receptor)            | 2q31.3       | NM_000885    | 3676   | 3.1 | 3.0E-20 |                                                |
| 2974330 | CTGF      | connective tissue growth factor                                               | 6q23.1       | NM_001901    | 1490   | 3.5 | 3.1E-12 |                                                |
| 2772876 | ADAMTS3   | ADAM metalloproteinase with thrombospondin type 1 motif 3                     | 4q13.3       | NM_014243    | 9508   | 3.1 | 4.9E-10 |                                                |
| 2814693 | CARTPT    | CART prepropeptide                                                            | 5q13.2       | NM_004291    | 9607   | 3.2 | 8.4E-23 |                                                |
| 2726910 | SPATA18   | spermatogenesis associated 18 homolog (rat)                                   | 4q11         | NM_145263    | 132671 | 2.7 | 1.4E-16 | 602606: Obesity, susceptibility to             |
| 2788926 | NR3C2     | nuclear receptor subfamily 3 group C member 2                                 | 4q31.1       | NM_000901    | 4306   | 5.2 | 1.2E-23 |                                                |
| 3248470 | C10orf107 | chromosome 10 open reading frame 107                                          | 10q21.2      | NM_173554    | 219621 | 2.2 | 4.2E-11 |                                                |
| 3348551 | FLJ46266  | FLJ46266 protein                                                              | 11q23.1      | NM_207430    | 399949 | 2.2 | 4.8E-19 |                                                |
| 3743230 | TEKT1     | tektin 1                                                                      | 17p13.2      | NM_053285    | 83659  | 2.7 | 1.8E-18 |                                                |
| 2476510 | LTBP1     | latent transforming growth factor beta binding protein 1                      | 2p22-p21     | NM_000627    | 4052   | 3.2 | 1.0E-07 |                                                |
| 2989316 | LOC222967 | hypothetical protein LOC222967                                                | 7p22.1       | NM_173565    | 222967 | 2.0 | 1.5E-23 |                                                |
| 3460198 | WIF1      | WNT inhibitory factor 1                                                       | 12q14.3      | NM_007191    | 11197  | 2.3 | 1.3E-08 |                                                |
| 2857042 | CDC20B    | cell division cycle 20 homolog B (S. cerevisiae)                              | 5q11.2       | NM_152623    | 166979 | 3.3 | 1.5E-20 |                                                |
| 3748909 | ULK2      | unc-51-like kinase 2 (C. elegans)                                             | 17p11.2      | NM_014683    | 146802 | 3.1 | 1.5E-18 |                                                |
| 3510344 | STOML3    | stomatin (EPB72)-like 3                                                       | 13q13.3      | NM_145286    | 161003 | 2.0 | 2.4E-14 |                                                |
| 3450234 | PKP2      | plakophilin 2                                                                 | 12p11        | NM_004572    | 5318   | 3.8 | 7.4E-23 |                                                |
| 2332999 | WDR65     | WD repeat domain 65                                                           | 1p34.2       | NM_152498    | 440586 | 2.4 | 1.6E-20 |                                                |
| 3305198 | C10orf79  | chromosome 10 open reading frame 79                                           | 10q25.1      | NM_025145    | 80217  | 2.4 | 7.4E-18 |                                                |
| 3550343 | AK7       | adenylate kinase 7                                                            | 14q32.2      | NM_152327    | 122481 | 2.2 | 7.7E-18 |                                                |
| 3238528 | SPAG6     | sperm associated antigen 6                                                    | 10p12.2      | NM_012443    | 9576   | 3.7 | 1.1E-15 |                                                |
| 3710018 | WDR16     | WD repeat domain 16                                                           | 17p13.1      | NM_145054    | 146845 | 3.2 | 2.3E-20 |                                                |
| 2955556 | CLIC5     | chloride intracellular channel 5                                              | 6p12.1-21.1  | NM_016929    | 53405  | 3.0 | 2.0E-10 |                                                |
| 3174816 | ANXA1     | annexin A1                                                                    | 9q12-q21.2   | NM_000700    | 301    | 2.8 | 7.3E-18 |                                                |
| 2704052 | FLJ23049  | hypothetical protein FLJ23049                                                 | 3q26.1       | NM_024687    | 79740  | 2.0 | 6.5E-12 |                                                |
| 3724895 | LRR46     | leucine rich repeat containing 46                                             | 17q21.32     | NM_033413    | 90506  | 2.9 | 1.0E-15 |                                                |
| 3818193 | CAPS      | calyphosine                                                                   | 19p13.3      | NM_080590    | 828    | 4.5 | 1.1E-17 |                                                |
| 2344731 | WDR63     | WD repeat domain 63                                                           | 1p22.3       | NM_145172    | 126820 | 2.1 | 3.9E-20 |                                                |
| 3300115 | PPP1R3C   | protein phosphatase 1 regulatory (inhibitor) subunit 3C                       | 10q23-q24    | NM_005398    | 5507   | 2.5 | 1.3E-11 |                                                |
| 3146455 | RGS22     | regulator of G-protein signalling 22                                          | 8q22.2       | NM_015668    | 26166  | 2.4 | 9.5E-13 |                                                |
| 3712835 | LRR48     | leucine rich repeat containing 48                                             | 17p11.2      | NM_031294    | 83450  | 2.4 | 2.8E-17 |                                                |
| 2941632 | MAK       | male germ cell-associated kinase                                              | 6q22         | NM_005906    | 4117   | 2.0 | 3.7E-18 |                                                |
| 2660617 | IL5RA     | interleukin 5 receptor alpha                                                  | 3p26-p24     | NM_175726    | 3568   | 2.7 | 1.4E-16 |                                                |
| 3487360 | C13orf30  | chromosome 13 open reading frame 30                                           | 13q14.11     | NM_182508    | 144809 | 5.4 | 7.8E-22 |                                                |
| 3546213 | TSHR      | thyroid stimulating hormone receptor                                          | 14q31        | NM_000369    | 7253   | 3.0 | 4.1E-27 |                                                |
| 2820813 | FAM81B    | family with sequence similarity 81 member B                                   | 5q15         | NM_152548    | 153643 | 2.1 | 5.8E-18 |                                                |
| 3184710 | MUSK      | muscle skeletal receptor tyrosine kinase                                      | 8p21.2       | NM_005592    | 440258 | 2.0 | 2.1E-14 |                                                |
| 3188014 | C9orf18   | chromosome 9 open reading frame 18                                            | 9q33.2       | NM_198469    | 254956 | 3.1 | 4.6E-30 |                                                |
| 3710515 | DNAH9     | dynein axonemal heavy chain 9                                                 | 17p12        | NM_001372    | 1770   | 2.4 | 1.8E-25 |                                                |
| 3238702 | ARMC3     | armadillo repeat containing 3                                                 | 10p12.31     | NM_173081    | 219681 | 2.6 | 2.7E-17 |                                                |
| 3504526 | LATS2     | LATS large tumor suppressor homolog 2 (Drosophila)                            | 13q11-q12    | NM_014572    | 26524  | 2.7 | 3.5E-19 |                                                |
| 3871142 | C19orf51  | chromosome 19 open reading frame 51                                           | 19q13.4      | NM_178837    | 352909 | 3.0 | 1.1E-14 |                                                |
| 3301218 | PDLIM1    | PDZ and LIM domain 1 (elfin)                                                  | 10q22-q26.3  | NM_020992    | 9124   | 2.4 | 3.5E-09 |                                                |
| 3978295 | RIBC1     | RIB43A domain with coiled-coils 1                                             | Xp11.22      | NM_144968    | 158787 | 2.0 | 4.3E-20 |                                                |
| 2329131 | HPCA      | hippocalcin                                                                   | 1p35-p34.2   | NM_002143    | 3208   | 5.1 | 8.7E-18 |                                                |
| 2530733 | WDR69     | WD repeat domain 69                                                           | 2q36.3       | NM_178821    | 164781 | 3.3 | 3.0E-26 |                                                |
| 2865327 | HAPLN1    | hyaluronan and proteoglycan link protein 1                                    | 5q14.3       | NM_001884    | 1404   | 2.6 | 2.5E-14 |                                                |
| 4006326 | RRM2      | ribonucleotide reductase M2 polypeptide                                       | Xp11.3       | NM_001034    | 80258  | 2.4 | 1.2E-18 |                                                |
| 2351787 | C1orf88   | chromosome 1 open reading frame 88                                            | 1p13.2       | BC101501     | 128344 | 5.3 | 7.0E-29 |                                                |
| 3878972 | C20orf26  | chromosome 20 open reading frame 26                                           | 20p11.23     | NM_015585    | 26074  | 2.3 | 4.3E-25 |                                                |
| 3257670 | PCGF5     | polycomb group ring finger 5                                                  | 10q23.32     | NM_032373    | 84333  | 2.0 | 5.7E-08 |                                                |
| 2705030 | SLC7A14   | solute carrier family 7 (cationic amino acid transporter y+ system) member 14 | 3q26.2       | NM_020949    | 57709  | 2.3 | 7.8E-17 |                                                |
| 3427282 | C12orf63  | chromosome 12 open reading frame 63                                           | 12q23.1      | NM_198520    | 374467 | 2.6 | 2.2E-23 |                                                |
| 2826118 | ZNF474    | zinc finger protein 474                                                       | 5q23.1-q23.2 | NM_207317    | 133923 | 2.1 | 4.2E-17 |                                                |
| 3538403 | LRR49     | leucine rich repeat containing 9                                              | 14q23.1      | AK128037     | 341883 | 2.0 | 3.8E-18 |                                                |
| 2330723 | DNAL1     | dynein axonemal light intermediate chain 1                                    | 1p35.1       | NM_003462    | 7802   | 2.0 | 2.9E-20 |                                                |
| 3281762 | C10orf63  | chromosome 10 open reading frame 63                                           | 10p12.1      | NM_145010    | 219670 | 2.6 | 1.4E-17 |                                                |
| 2675239 | TUSC4     | tumor suppressor candidate 4                                                  | 3p21.3       | NM_006545    | 51364  | 2.5 | 4.2E-25 |                                                |
| 2719656 | CD38      | CD38 molecule                                                                 | 4p15         | NM_001775    | 952    | 2.3 | 1.3E-11 |                                                |
| 3424705 | LRR1Q1    | leucine-rich repeats and IQ motif containing 1                                | 12q21        | NM_001079910 | 84125  | 2.5 | 3.1E-17 |                                                |
| 3753568 | SLFN13    | schlafen family member 13                                                     | 17q12        | NM_144682    | 146857 | 2.0 | 1.8E-18 |                                                |
| 2782822 | NDST4     | N-deacetylase/N-sulfotransferase (heparan glucosaminyl) 4                     | 4q25-q26     | NM_022569    | 64579  | 2.7 | 7.2E-40 |                                                |
| 2916307 | SLC35A1   | solute carrier family 35 (CMP-sialic acid transporter) member A1              | 6q15         | NM_006416    | 10559  | 2.7 | 1.5E-23 |                                                |
| 3574121 | STON2     | stonin 2                                                                      | 14q31.1      | NM_033104    | 85439  | 2.6 | 7.7E-25 |                                                |
| 3297536 | ANXA11    | annexin A11                                                                   | 10q23        | NM_145869    | 311    | 3.0 | 3.3E-14 |                                                |
| 3728037 | SCPEP1    | serine carboxypeptidase 1                                                     | 17q22        | NM_021626    | 59342  | 2.5 | 7.4E-26 |                                                |
| 2491089 | FLJ37357  | hypothetical protein FLJ37357                                                 | 2p11.2       | NM_173645    | 440870 | 2.0 | 9.8E-20 |                                                |
| 3699634 | CHST5     | carbohydrate (N-acetylglucosamine 6-O) sulfotransferase 5                     | 16q22        | NM_024533    | 4166   | 2.3 | 1.1E-16 |                                                |
| 2636695 | ZDHC23    | zinc finger DHHC-type containing 23                                           | 3q13.31      | NM_173570    | 254887 | 4.1 | 4.2E-23 |                                                |
| 3987876 | HTR2C     | 5-hydroxytryptamine (serotonin) receptor 2C                                   | Xq24         | NM_000868    | 3358   | 3.9 | 2.4E-12 | tardive dyskinesia (Segman, R. H. et al. 2000) |
| 2838462 | GABRG2    | gamma-aminobutyric acid (GABA) A receptor gamma 2                             | 5q31.1-q33.1 | NM_198904    | 2566   | 2.0 | 9.6E-08 | 607681: Epilepsy, childhood absence, 2         |
| 3203996 | C9orf24   | chromosome 9 open reading frame 24                                            | 9p13.3       | NM_147169    | 84688  | 2.9 | 5.4E-31 |                                                |
| 4006210 | MAOB      | monamine oxidase B                                                            | Xp11.23      | NM_000898    | 4129   | 2.1 | 9.5E-17 | Parkinson's disease (Persian, A. et al. 2004)  |

### Cluster 3: STR

| Exon Array            |                      |                                     |              |            |                  |               |                     |                                |                                                   |
|-----------------------|----------------------|-------------------------------------|--------------|------------|------------------|---------------|---------------------|--------------------------------|---------------------------------------------------|
| Transcript Cluster ID | Official Gene Symbol | Gene Name                           | Confirmation | Cytoband   | RefSeq Accession | Entrez GeneID | Maximum Fold Change | p-value (False Discovery Rate) | OMIM and Genetic Association Database annotations |
| 2692319               | ADCV5                | adenylate cyclase 5                 |              | 3q13.2-q21 | NM_183357        | 111           | 2.7                 | 5.5E-13                        |                                                   |
| 2682436               | RYBP                 | RING1 and YY1 binding protein       |              | 3p13       | NM_012234        | 23429         | 2.4                 | 3.4E-16                        |                                                   |
| 2682271               | PROK2                | prokineticin 2                      |              | 3p21.1     | NM_021935        | 60675         | 2.2                 | 1.4E-21                        |                                                   |
| 3649052               | MKL2                 | MKL/myocardin-like 2                |              | 17p11.2    | NM_014048        | 51030         | 5.6                 | 2.0E-21                        |                                                   |
| 2748830               | GUCY1A3              | guanylate cyclase 1 soluble alpha 3 |              | 4q31.3-q33 | NM_000856        | 2982          | 5.6                 | 7.1E-20                        |                                                   |

|         |               |                                                                                                     |                 |              |        |      |         |                                                                           |
|---------|---------------|-----------------------------------------------------------------------------------------------------|-----------------|--------------|--------|------|---------|---------------------------------------------------------------------------|
| 2748923 | GUCY1B3       | guanylate cyclase 1 soluble beta 3                                                                  | 4q31.3-q33      | NM_000857    | 2983   | 3.4  | 2.7E-12 |                                                                           |
| 3295376 | ZNF503        | zinc finger protein 503                                                                             | 10q22.2         | NM_032772    | 84858  | 3.8  | 1.7E-17 |                                                                           |
| 2591837 | SLC40A1       | solute carrier family 40 (iron-regulated transporter) member 1                                      | 2q32            | NM_014585    | 30061  | 2.3  | 1.5E-09 |                                                                           |
| 2843091 | RGS14         | regulator of G-protein signalling 14                                                                | 5q35.3          | NM_006480    | 10636  | 2.2  | 2.2E-20 |                                                                           |
| 3402039 | KCNA5         | potassium voltage-gated channel shaker-related subfamily member 5                                   | 12p13           | NM_002234    | 3741   | 2.2  | 6.6E-17 |                                                                           |
| 3391653 | DRD2          | dopamine receptor D2                                                                                | 11q23           | NM_000795    | 1813   | 6.8  | 2.7E-37 |                                                                           |
| 3001479 | IKZF1         | IKAROS family zinc finger 1 (Ikaros)                                                                | 7p13-p11.1      | NM_006060    | 10320  | 2.6  | 3.3E-21 | attention deficit hyperactivity disorder (Auerbach, J. G. et al. 2001)    |
| 3242353 | CREM          | cAMP responsive element modulator                                                                   | 10p11.21        | NM_183011    | 1390   | 2.2  | 1.6E-19 |                                                                           |
| 2926969 | PDE7B         | phosphodiesterase 7B                                                                                | 6q23-q24        | NM_018945    | 27115  | 5.2  | 7.5E-32 |                                                                           |
| 3042610 | SKAP2         | src kinase associated phosphoprotein 2                                                              | 7p21-p15        | NM_003930    | 8935   | 6.1  | 2.4E-30 |                                                                           |
| 2985497 | DACT2         | dapper antagonist of beta-catenin homolog 2 (Xenopus laevis)                                        | 6q27            | NM_214462    | 168002 | 2.3  | 4.1E-24 |                                                                           |
| 2339139 | INADL         | lnaD-like (Drosophila)                                                                              | 1p31.3          | NM_176877    | 10207  | 3.0  | 1.1E-22 |                                                                           |
| 3845944 | GNG7          | guanine nucleotide binding protein (G protein) gamma 7                                              | 19p13.3         | NM_052847    | 2788   | 4.4  | 6.0E-31 |                                                                           |
| 3984702 | DRP2          | dystrophin related protein 2                                                                        | Xq22            | NM_001939    | 1821   | 2.0  | 1.9E-20 | schizophrenia (Hong, L. E. et al. 2005)                                   |
| 2837970 | ADRA1B        | adrenergic alpha-1B- receptor                                                                       | 5q23-q32        | NM_000679    | 147    | 2.6  | 3.3E-18 |                                                                           |
| 2951999 | CPNE5         | copine V                                                                                            | 6p21.1          | NM_020939    | 57699  | 3.5  | 1.4E-24 |                                                                           |
| 2539125 | LOC129607     | hypothetical protein LOC129607                                                                      | 2p25.2          | NM_207315    | 129607 | 2.1  | 2.2E-20 |                                                                           |
| 3596147 | GCNT3         | glucosaminyl (N-acetyl) transferase 3 mucin type                                                    | 15q21.3         | NM_004751    | 9245   | 2.0  | 1.6E-13 |                                                                           |
| 2417362 | DIRAS3        | DIRAS family GTP-binding RAS-like 3                                                                 | 1p31            | NM_004675    | 9077   | 3.8  | 1.2E-14 |                                                                           |
| 3779207 | GNAL          | guanine nucleotide binding protein (G protein) alpha activating activity polypeptide olfactory type | 18p11.22-p11.21 | NM_182978    | 2774   | 2.9  | 1.1E-12 |                                                                           |
| 2943236 | DTNBP1        | dystrobrevin binding protein 1                                                                      | 6p22.3          | NM_183040    | 84062  | 2.4  | 1.3E-15 | schizophrenia (Van Den Bogaert, A. et al. 2003)                           |
| 3386038 | TRIM49        | tripartite motif-containing 49                                                                      | 11p11.12        | NM_020358    | 340970 | 2.0  | 2.5E-20 |                                                                           |
| 2647898 | MED12L        | mediator of RNA polymerase II transcription subunit 12 homolog (S. cerevisiae)-like                 | 3q25.1          | NM_053002    | 116931 | 2.0  | 5.4E-19 |                                                                           |
| 3834176 | TMEM91        | transmembrane protein 91                                                                            | 19q13.1-q13.2   | NM_001042595 | 593    | 2.0  | 4.8E-20 |                                                                           |
| 2663714 | WNT7A         | wingless-type MMTV integration site family member 7A                                                | 3p25            | NM_004625    | 7476   | 4.2  | 5.4E-16 |                                                                           |
| 2888010 | DRD1          | dopamine receptor D1                                                                                | 5q35.1          | NM_000794    | 1812   | 5.0  | 3.3E-24 | attention deficit hyperactivity disorder (Bobb, A. J. et al. 2005)        |
| 3127584 | EGR3          | early growth response 3                                                                             | 8p23-p21        | NM_004430    | 1960   | 3.1  | 8.3E-12 |                                                                           |
| 3315907 | LRRC56        | leucine rich repeat containing 56                                                                   | 11p15.5         | NM_198075    | 115399 | 2.7  | 2.0E-15 |                                                                           |
| 3458230 | MYO1A         | myosin IA                                                                                           | 12q13-q21       | NM_005379    | 6866   | 2.3  | 2.4E-22 |                                                                           |
| 2614369 | RARB          | retinoic acid receptor beta                                                                         | 3p24            | NM_000965    | 5915   | 8.9  | 3.6E-29 |                                                                           |
| 2808931 | ISL1          | ISL1 transcription factor LIM/homeodomain (islet-1)                                                 | 5q11.2          | NM_002202    | 3670   | 6.1  | 4.3E-38 |                                                                           |
| 2648677 | MME           | membrane metallo-endopeptidase                                                                      | 3q25.1-q25.2    | NM_007289    | 4311   | 3.4  | 3.1E-24 | Alzheimer's Disease (Sakai, A. et al. 2004)                               |
| 2348962 | GPR88         | G protein-coupled receptor 88                                                                       | 1p21.3          | NM_022049    | 54112  | 9.8  | 4.0E-39 |                                                                           |
| 3561381 | NKX2-1 (TTF1) | thyroid transcription factor 1                                                                      | 14q13           | NM_003317    | 7080   | 2.7  | 7.0E-26 |                                                                           |
| 2372858 | RGS2          | regulator of G-protein signalling 2 24kDa                                                           | 1q31            | NM_002923    | 5997   | 5.2  | 3.2E-32 |                                                                           |
| 3953374 | RIMBP3        | RIMS binding protein 3                                                                              | 22              | XM_371429    | 85376  | 2.0  | 1.6E-09 |                                                                           |
| 2681753 | FOXP1         | forkhead box P1                                                                                     | 3p14.1          | NM_032682    | 27086  | 6.5  | 2.1E-13 |                                                                           |
| 2984275 | PDE10A        | phosphodiesterase 10A                                                                               | 6q26            | NM_006661    | 10846  | 7.3  | 3.7E-39 |                                                                           |
| 2603987 | NGEF          | neuronal guanine nucleotide exchange factor                                                         | 2q37            | NM_019850    | 25791  | 4.8  | 6.5E-19 |                                                                           |
| 3588658 | LARP4         | La ribonucleoprotein domain family member 4                                                         | 1q21.2          | NM_052879    | 7170   | 2.2  | 3.8E-18 |                                                                           |
| 2342475 | LHX8          | LIM homeobox 8                                                                                      | 1p31.1          | NM_001001933 | 431707 | 3.3  | 4.4E-29 | schizophrenia (Chen, Q. et al. 2005)                                      |
| 3011180 | GRM3          | glutamate receptor metabotropic 3                                                                   | 7q21.1-q21.2    | NM_000840    | 2913   | 2.9  | 4.0E-16 |                                                                           |
| 2442008 | RXRG          | retinoid X receptor gamma                                                                           | 1q22-q23        | NM_006917    | 6258   | 39.1 | 6.5E-36 |                                                                           |
| 3122489 | ANGPT2        | angiopoietin 2                                                                                      | 8p23.1          | NM_001147    | 285    | 2.7  | 2.4E-28 |                                                                           |
| 2937144 | SMOC2         | SPARC related modular calcium binding 2                                                             | 6q27            | NM_022138    | 64094  | 3.5  | 5.6E-34 |                                                                           |
| 3450362 | SYT10         | synaptotagmin X                                                                                     | 12p11.1         | NM_198992    | 341359 | 6.0  | 2.2E-38 |                                                                           |
| 2560524 | TACR1         | tachykinin receptor 1                                                                               | 2p13.1          | NM_015727    | 6869   | 2.4  | 1.0E-22 |                                                                           |
| 3894906 | PDYN          | prodynorphin                                                                                        | 20pter-p12      | NM_024411    | 5173   | 10.9 | 1.8E-36 | schizophrenia (Zhang, C. S. et al. 2004)                                  |
| 2689378 | DRD3          | dopamine receptor D3                                                                                | 3q13.3          | NM_000796    | 1814   | 3.8  | 6.7E-26 | tardive dyskinesia (Zhang, Z. et al. 2003)                                |
| 3484393 | RXFP2         | relaxin/insulin-like family peptide receptor 2                                                      | 13q13.1         | NM_130806    | 122042 | 2.0  | 1.1E-16 |                                                                           |
| 3733275 | KCNJ2         | potassium inwardly-rectifying channel subfamily J member 2                                          | 17q23.1-q24.2   | NM_000891    | 3759   | 3.4  | 3.0E-30 |                                                                           |
| 3992512 | BRS3          | bombesin-like receptor 3                                                                            | Xq26-q28        | NM_001727    | 680    | 4.3  | 1.2E-35 |                                                                           |
| 3023483 | FAM40B        | family with sequence similarity 40 member B                                                         | 7q32.1          | BC019064     | 57464  | 24.2 | 4.5E-51 |                                                                           |
| 3461496 | BEST3         | bestrophin 3                                                                                        | 12q14.2-q15     | NM_032735    | 84821  | 2.1  | 5.8E-13 |                                                                           |
| 3990927 | RP13-102H20.1 | hypothetical protein FLJ30058                                                                       | Xq26.1          | NM_144967    | 158763 | 2.7  | 4.3E-32 |                                                                           |
| 3252690 | C10orf11      | chromosome 10 open reading frame 11                                                                 | 10q22.2-q22.3   | NM_032024    | 83938  | 2.3  | 6.1E-38 |                                                                           |
| 3774906 | SECTM1        | secreted and transmembrane 1                                                                        | 17q25           | NM_003004    | 6398   | 2.0  | 1.1E-21 | anxiety disorder (Alsene, K. et al. 2003)                                 |
| 3940099 | ADORA2A       | adenosine A2a receptor                                                                              | 22q11.23        | NM_000675    | 135    | 3.6  | 5.4E-22 |                                                                           |
| 2503929 | CNTNAP5       | contactin associated protein-like 5                                                                 | 2q14.3          | NM_130773    | 129684 | 2.8  | 1.2E-18 |                                                                           |
| 2592356 | STAT4         | signal transducer and activator of transcription 4                                                  | 2q32.2-q32.3    | NM_003151    | 6775   | 2.3  | 1.1E-30 |                                                                           |
| 2498806 | SLC5A7        | solute carrier family 5 (choline transporter) member 7                                              | 2q12            | NM_021815    | 60482  | 2.6  | 3.9E-14 |                                                                           |
| 3886938 | WFDC2         | WAP four-disulfide core domain 2                                                                    | 20q12-q13.2     | NM_006103    | 10406  | 2.5  | 3.0E-18 |                                                                           |
| 2763550 | PPARGC1A      | peroxisome proliferator-activated receptor gamma coactivator 1 alpha                                | 4p15.1          | NM_013261    | 10891  | 2.0  | 1.0E-13 |                                                                           |
| 3528944 | REM2          | RAS (RAD and GEM)-like GTP binding 2                                                                | 14q11.2         | NM_173527    | 161253 | 4.3  | 3.0E-30 |                                                                           |
| 2840270 | KCNIP1        | Kv channel interacting protein 1                                                                    | 5q35.1          | NM_001034838 | 442143 | 3.0  | 5.9E-30 |                                                                           |
| 3732049 | CACNG5        | calcium channel voltage-dependent gamma subunit 5                                                   | 17q24           | NM_014404    | 27091  | 5.7  | 3.0E-39 |                                                                           |
| 3247712 | ZCD1          | zinc finger CDGSH-type domain 1                                                                     | 10q21.1         | NM_018464    | 55847  | 2.0  | 7.9E-13 |                                                                           |
| 3353914 | LOH11CR2A     | loss of heterozygosity 11 chromosomal region 2 gene A                                               | 11q23           | NM_014622    | 4013   | 2.3  | 3.4E-22 |                                                                           |
| 3002420 | VSTM2         | V-set and transmembrane domain containing 2                                                         | 7p11.2          | NM_182546    | 222008 | 2.7  | 8.7E-13 |                                                                           |
| 3464860 | DUSP6         | dual specificity phosphatase 6                                                                      | 12q22-q23       | NM_001946    | 1848   | 2.4  | 8.6E-15 |                                                                           |
| 3888472 | LOC112703     | hypothetical protein BC004941                                                                       | 19q13.33        | NM_138411    | 112703 | 2.1  | 5.5E-18 |                                                                           |
| 2898499 | ALDH5A1       | aldehyde dehydrogenase 5 family member A1 (succinate-semialdehyde dehydrogenase)                    | 6p22.2-p22.3    | NM_170740    | 7915   | 2.0  | 1.1E-17 | memory disturbance (Plomin, R. et al. 2004)                               |
| 3918429 | OLIG1         | oligodendrocyte transcription factor 1                                                              | 21q22.11        | NM_138983    | 116448 | 2.3  | 1.2E-21 |                                                                           |
| 2479746 | C2orf34       | chromosome 2 open reading frame 34                                                                  | 2p21            | BC029359     | 79823  | 2.2  | 5.9E-33 |                                                                           |
| 3348748 | C11orf1       | chromosome 11 open reading frame 1                                                                  | 11p15.5         | NM_022761    | 64776  | 2.0  | 1.1E-16 |                                                                           |
| 3214227 | DIRAS2        | DIRAS family GTP-binding RAS-like 2                                                                 | 9q22.2          | NM_017594    | 54769  | 3.3  | 5.9E-15 |                                                                           |
| 3778504 | RAB31         | RAB31 member RAS oncogene family                                                                    | 18p11.3         | NM_006868    | 11031  | 3.0  | 9.5E-12 |                                                                           |
| 3417703 | HSD17B6       | hydroxysteroid (17-beta) dehydrogenase 6 homolog (mouse)                                            | 12q13           | NM_003725    | 8630   | 2.5  | 3.5E-26 |                                                                           |
| 3694215 | CDH8          | cadherin 8 type 2                                                                                   | 16q22.1         | NM_001796    | 1006   | 5.6  | 3.3E-17 |                                                                           |
| 2364381 | RG54          | regulator of G-protein signalling 4                                                                 | 1q23.3          | NM_005613    | 5999   | 3.5  | 5.3E-32 | 604906: SCHIZOPHRENIA 9, SCZD9: schizophrenia (Sobell, J. L. et al. 2005) |
| 4022183 | HS6ST2        | heparan sulfate 6-O-sulfotransferase 2                                                              | Xq26.2          | NM_001077188 | 90161  | 4.1  | 6.2E-27 |                                                                           |
| 3014065 | TAC1          | tachykinin precursor 1                                                                              | 7q21-q22        | NM_003182    | 6863   | 6.9  | 2.7E-31 |                                                                           |
| 3456700 | ZNF385        | zinc finger protein 385                                                                             | 12q13.13        | NM_015481    | 25946  | 2.2  | 2.4E-19 |                                                                           |

|         |         |                                                                              |                 |              |              |        |         |         |
|---------|---------|------------------------------------------------------------------------------|-----------------|--------------|--------------|--------|---------|---------|
| 3422855 | GLIPR1  | GLI pathogenesis-related 1 (glioma)                                          | 12q21.2         | NM_006851    | 11010        | 3.4    | 4.1E-38 |         |
| 3662696 | CX3CL1  | chemokine (C-X3-C motif) ligand 1                                            | 16q13           | NM_002996    | 6376         | 3.7    | 2.9E-17 |         |
| 2362089 | KIRREL  | kin of IRRE like (Drosophila)                                                | 1q23.1          | NM_018240    | 55243        | 2.4    | 2.1E-09 |         |
| 3227070 | PTGES   | prostaglandin E synthase                                                     | 9q34.3          | NM_004878    | 9536         | 2.5    | 4.8E-17 |         |
| 3858907 | SLC7A10 | solute carrier family 7 (neutral amino acid transporter y+ system) member 10 | 19q13.1         | NM_019849    | 56301        | 2.2    | 3.2E-16 |         |
| 2977122 | NMBR    | neuromedin B receptor                                                        | 6q21-qter       | NM_002511    | 4829         | 3.5    | 1.1E-13 |         |
| 3911217 | TMEPAI  | transmembrane prostate androgen induced RNA                                  | 20q13.31-q13.33 | NM_199170    | 56937        | 2.6    | 1.7E-21 |         |
| 2371139 | LAMC2   | laminin gamma 2                                                              | 1q25-q31        | NM_005562    | 3918         | 2.4    | 2.7E-31 |         |
| 2924330 | TPD52L1 | tumor protein D52-like 1                                                     | qRT-PCR, ISH    | 6q22-q23     | NM_001003395 | 7164   | 7.6     | 1.1E-31 |
| 3603295 | CRABP1  | cellular retinoic acid binding protein 1                                     | 15q24           | NM_004378    | 1381         | 25.2   | 3.6E-40 |         |
| 3731543 | RGS9    | regulator of G-protein signalling 9                                          | 17q23-q24       | NM_001081955 | 8787         | 2.9    | 2.3E-20 |         |
| 3902560 | DUSP15  | dual specificity phosphatase 15                                              | 20q11.21        | NM_177991    | 128853       | 2.0    | 7.0E-15 |         |
| 2438458 | CRABP2  | cellular retinoic acid binding protein 2                                     | 1q21.3          | NM_001878    | 1382         | 2.0    | 5.3E-24 |         |
| 3401381 | TSPAN9  | tetraspanin 9                                                                | qRT-PCR         | 12p13.3      | NM_006675    | 10867  | 3.8     | 4.4E-37 |
| 3394264 | MCAM    | melanoma cell adhesion molecule                                              |                 | 11q23.3      | NM_006500    | 4162   | 2.3     | 1.5E-14 |
| 3576441 | CCDC88C | coiled-coil domain containing 88C                                            |                 | 14q32.12     | BC035914     | 440193 | 4.6     | 2.5E-25 |
| 3982975 | POU3F4  | POU domain class 3 transcription factor 4                                    |                 | Xq21.1       | NM_000307    | 5456   | 3.1     | 2.3E-10 |

#### Cluster 4: THM

| Exon Array |           | Transcript                                                                                                              | Official Gene | Gene Name | Confirmation | Cytoband       | RefSeq       | Entrez | Maximum     | p-value (False  | OMIM and Genetic Association Database annotations         |
|------------|-----------|-------------------------------------------------------------------------------------------------------------------------|---------------|-----------|--------------|----------------|--------------|--------|-------------|-----------------|-----------------------------------------------------------|
| Cluster ID | Symbol    | Cluster ID                                                                                                              | Symbol        | Gene Name | Confirmation | Cytoband       | Accession    | GeneID | Fold Change | Discovery Rate) | OMIM and Genetic Association Database annotations         |
| 2567647    | CREG2     | cellular repressor of E1A-stimulated genes 2                                                                            |               |           |              | 2q11.2         | NM_153836    | 200407 | 5.0         | 2.1E-17         |                                                           |
| 2679406    | CADPS     | Ca2+-dependent secretion activator                                                                                      |               |           |              | 3p14.2         | NM_183394    | 8618   | 2.2         | 8.2E-10         |                                                           |
| 3223967    | GGTA1     | glycoprotein alpha-galactosyltransferase 1                                                                              |               |           |              | 9q34.11        | NR_003191    | 2681   | 2.0         | 2.0E-19         |                                                           |
| 2686602    | IMPG2     | interphotoreceptor matrix proteoglycan 2                                                                                |               |           |              | 3q12.2-q12.3   | NM_016247    | 50939  | 2.1         | 3.3E-29         |                                                           |
| 2646125    | CHST2     | carbohydrate (N-acetylglucosamine-6-O) sulfotransferase 2                                                               |               |           |              | 3q24           | NM_004267    | 9435   | 2.0         | 2.5E-09         |                                                           |
| 3218151    | GRIN3A    | glutamate receptor ionotropic N-methyl-D-aspartate 3A                                                                   |               |           |              | 9q31.1         | NM_133445    | 116443 | 6.6         | 8.5E-19         |                                                           |
| 2379665    | PROX1     | prospero homeobox 1                                                                                                     |               |           |              | 1q32.2-q32.3   | NM_002763    | 5629   | 8.0         | 4.6E-27         |                                                           |
| 2781138    | LEF1      | lymphoid enhancer-binding factor 1                                                                                      |               |           |              | 4q23-q25       | NM_016269    | 51176  | 6.8         | 1.3E-39         |                                                           |
| 3681674    | NTAN1     | N-terminal asparagine amidase                                                                                           |               |           |              | 16p13.11       | NM_173474    | 123803 | 2.1         | 1.9E-11         |                                                           |
| 2698996    | PCOLCE2   | procollagen C-endopeptidase enhancer 2                                                                                  |               |           |              | 3q21-q24       | NM_013363    | 26577  | 3.0         | 3.9E-25         |                                                           |
| 2649532    | RSRC1     | arginine/serine-rich coiled-coil 1                                                                                      |               |           |              | 3q25.32        | NM_016625    | 51319  | 2.0         | 2.0E-08         |                                                           |
| 2944025    | TPMT      | thiopurine S-methyltransferase                                                                                          |               |           |              | 6p22.3         | NM_000367    | 7172   | 2.0         | 1.8E-11         |                                                           |
| 2382970    | EPHX1     | epoxide hydrolase 1 microsomal (xenobiotic)                                                                             |               |           |              | 1q42.1         | NM_000120    | 2052   | 2.5         | 1.0E-21         |                                                           |
| 2349863    | NTNG1     | netrin G1                                                                                                               |               |           | qRT-PCR      | 1p13.3         | NM_014917    | 22854  | 20.6        | 2.8E-35         | schizophrenia (Fukasawa, M. et al. 2004)                  |
| 2351294    | KCNCA     | potassium voltage-gated channel Shaw-related subfamily member 4                                                         |               |           |              | 1p21           | NM_004978    | 3749   | 2.2         | 4.7E-15         |                                                           |
| 2783596    | PDE5A     | phosphodiesterase 5A cGMP-specific                                                                                      |               |           | qRT-PCR, ISH | 4q25-q27       | NM_001083    | 8654   | 6.3         | 2.0E-41         |                                                           |
| 2863535    | WDR41     | WD repeat domain 41                                                                                                     |               |           |              | 5q14.1         | NM_018268    | 55255  | 2.6         | 4.9E-12         |                                                           |
| 3726618    | CACNA1G   | calcium channel voltage-dependent T type alpha 1G subunit                                                               |               |           |              | 17q22          | NM_198376    | 8913   | 2.7         | 1.7E-06         |                                                           |
| 2717253    | SORCS2    | sortilin-related VPS10 domain containing receptor 2                                                                     |               |           |              | 4p16.1         | NM_020777    | 57537  | 3.5         | 4.6E-30         |                                                           |
| 3868828    | KLK10     | kallikrein-related peptidase 10                                                                                         |               |           |              | 19q13.3-q13.4  | NM_001077500 | 5655   | 3.3         | 1.2E-24         |                                                           |
| 2353237    | VANGL1    | vang-like 1 (van gogh Drosophila)                                                                                       |               |           |              | 1p13.1         | NM_138959    | 81839  | 2.2         | 6.8E-17         |                                                           |
| 3444216    | STYK1     | serine/threonine/tyrosine kinase 1                                                                                      |               |           |              | 12p13.2        | NM_018423    | 55359  | 2.2         | 2.8E-23         |                                                           |
| 2931569    | AKAP12    | A kinase (PRKA) anchor protein (gravin) 12                                                                              |               |           |              | 6q24-q25       | NM_005100    | 9590   | 4.9         | 1.3E-26         |                                                           |
| 2704733    | TERC      | telomerase RNA component                                                                                                |               |           |              | 3q26.2         | NR_001566    | 84517  | 2.1         | 1.3E-18         |                                                           |
| 2703462    | C3orf57   | chromosome 3 open reading frame 57                                                                                      |               |           | qRT-PCR      | 3q26.1         | NM_001040100 | 165679 | 3.7         | 1.2E-28         |                                                           |
| 2787459    | INPP4B    | inositol polyphosphate-4-phosphatase type II 105kDa                                                                     |               |           |              | 4q31.21        | NM_003866    | 8821   | 3.1         | 2.7E-31         |                                                           |
| 3615791    | CHRFAM7A  | CHRNA7 (cholinergic receptor nicotinic alpha 7 exons 5-10) and FAM7A (family with sequence similarity 7A exons A-E) fus |               |           |              | 15q13.1        | NM_139320    | 89832  | 2.9         | 2.2E-22         | 118511; 609756; Schizophrenia, neurophysiologic defect in |
| 3264621    | TCF7L2    | transcription factor 7-like 2 (T-cell specific HMG-box)                                                                 |               |           | qRT-PCR, ISH | 10q25.3        | NM_000756    | 6934   | 32.6        | 2.1E-54         |                                                           |
| 2536625    | BOK       | BCL2-related ovarian killer                                                                                             |               |           |              | 2q37.3         | NM_032515    | 666    | 2.0         | 8.4E-08         |                                                           |
| 3678462    | PPL       | periplakin                                                                                                              |               |           |              | 16p13.3        | NM_002705    | 5493   | 2.2         | 5.7E-31         |                                                           |
| 3355860    | KCNJ5     | potassium inwardly-rectifying channel subfamily J member 5                                                              |               |           |              | 11q24          | NM_000890    | 3762   | 2.8         | 6.2E-21         |                                                           |
| 3758291    | VAT1      | vesicle amine transport protein 1 homolog (T. californica)                                                              |               |           |              | 17q21          | NM_006373    | 10493  | 3.0         | 1.7E-28         |                                                           |
| 2951221    | C6orf106  | chromosome 6 open reading frame 106                                                                                     |               |           |              | 6p21.31        | NM_024294    | 64771  | 2.0         | 5.7E-13         |                                                           |
| 3551432    | CYP46A1   | cytochrome P450 family 46 subfamily A polypeptide 1                                                                     |               |           |              | 14q32.1        | NM_006668    | 10858  | 2.8         | 8.6E-23         | Alzheimer's Disease (Johansson, A. et al. 2004)           |
| 3587226    | CHRNA7    | cholinergic receptor nicotinic alpha 7                                                                                  |               |           |              | 15q13.1        | NM_000746    | 1139   | 3.1         | 3.7E-23         | 118511; 609756; Schizophrenia, neurophysiologic defect in |
| 3064462    | VGf       | VEGF nerve growth factor inducible                                                                                      |               |           |              | 7q22           | NM_003378    | 7425   | 2.8         | 2.9E-18         |                                                           |
| 3933331    | C21orf25  | chromosome 21 open reading frame 25                                                                                     |               |           |              | 21q22.3        | NM_015500    | 25966  | 2.7         | 4.6E-22         |                                                           |
| 2794454    | GLRA3     | glycine receptor alpha 3                                                                                                |               |           |              | 4q33-q34       | NM_006529    | 8001   | 2.7         | 4.4E-14         |                                                           |
| 2546874    | GALNT14   | UDP-N-acetyl-alpha-D-galactosamine:polypeptide N-acetylgalactosaminyltransferase 14 (GalNAc-T14)                        |               |           |              | 2p23.1-p21     | NM_024572    | 440854 | 3.0         | 4.0E-22         |                                                           |
| 3644340    | SLC9A3R2  | solute carrier family 9 (sodium/hydrogen exchanger) member 3 regulator 2                                                |               |           |              | 16p13.3        | NM_004785    | 9351   | 2.4         | 3.9E-11         |                                                           |
| 3219885    | PTPN3     | protein tyrosine phosphatase non-receptor type 3                                                                        |               |           |              | 9q31           | NM_002829    | 5774   | 10.3        | 2.3E-35         |                                                           |
| 4007126    | SYN1      | synapsin I                                                                                                              |               |           |              | 7p11.2         | NM_133499    | 402509 | 2.1         | 2.0E-07         |                                                           |
| 3128271    | NEFL      | neurofilament light polypeptide 68kDa                                                                                   |               |           |              | 8p21           | NM_006158    | 4747   | 7.5         | 2.8E-07         |                                                           |
| 3432754    | LOC196463 | hypothetical protein LOC196463                                                                                          |               |           |              | 12q24.13       | NM_173542    | 196463 | 2.0         | 4.3E-12         |                                                           |
| 3758692    | MPP2      | membrane protein palmitoylated 2 (MAGUK p55 subfamily member 2)                                                         |               |           |              | 17q12-q21      | NM_005374    | 4355   | 2.4         | 1.5E-18         |                                                           |
| 3575241    | CKNK10    | potassium channel subfamily K member 10                                                                                 |               |           |              | 14q31          | NM_138317    | 54207  | 2.0         | 7.5E-12         |                                                           |
| 3721989    | CNTNAP1   | contactin associated protein 1                                                                                          |               |           | qRT-PCR      | 17q21          | NM_003632    | 8506   | 3.5         | 5.9E-17         |                                                           |
| 3967689    | STS       | steroid sulfatase (microsomal) arylsulfatase C isozyme S                                                                |               |           |              | Xp22.32        | NM_000351    | 412    | 2.4         | 8.3E-10         |                                                           |
| 2317434    | FAM79A    | family with sequence similarity 79 member A                                                                             |               |           |              | 1p36.32        | NM_182752    | 127262 | 2.1         | 1.5E-08         |                                                           |
| 2442698    | CREG1     | cellular repressor of E1A-stimulated genes 1                                                                            |               |           |              | 1q24           | NM_003851    | 8804   | 2.3         | 1.4E-14         |                                                           |
| 2373406    | CFHR1     | complement factor H-related 1                                                                                           |               |           |              | 1q32           | NM_002113    | 3075   | 2.3         | 8.5E-19         |                                                           |
| 3453513    | WNT10B    | wingless-type MMTV integration site family member 10B                                                                   |               |           |              | 12q13          | NM_003394    | 7480   | 2.0         | 3.7E-09         |                                                           |
| 2696040    | RAB6B     | RAB6B member RAS oncogene family                                                                                        |               |           |              | 3q22.1         | NM_016577    | 51560  | 2.4         | 1.1E-08         |                                                           |
| 2411198    | TAL1      | T-cell acute lymphocytic leukemia 1                                                                                     |               |           |              | 1p32           | NM_003189    | 6886   | 2.8         | 8.1E-32         |                                                           |
| 3034987    | CENTA1    | centaurin alpha 1                                                                                                       |               |           |              | 7p22.3         | NM_006869    | 11033  | 2.1         | 2.6E-13         |                                                           |
| 3193725    | OLFM1     | olfactomedin 1                                                                                                          |               |           |              | 9q34.3         | NM_014279    | 10439  | 6.8         | 7.9E-29         |                                                           |
| 3378895    | CABP2     | calcium binding protein 2                                                                                               |               |           |              | 11q13          | NM_016366    | 9600   | 2.3         | 7.3E-10         |                                                           |
| 2830450    | NPY6R     | neuropeptide Y receptor Y6 (pseudogene)                                                                                 |               |           |              | 5q31           | NR_002713    | 4888   | 2.0         | 1.2E-10         |                                                           |
| 2394626    | ACOT7     | acyl-CoA thioesterase 7                                                                                                 |               |           |              | 1p36.31-p36.11 | NM_007274    | 54626  | 2.1         | 2.4E-07         |                                                           |
| 3722700    | NAGS      | N-acetylglutamate synthase                                                                                              |               |           |              | 17q21.31       | NM_153006    | 162417 | 2.0         | 4.7E-07         | 237310; 608300; N-acetylglutamate synthase deficiency     |

|         |           |                                                                                         |              |                |              |        |      |         |                                                                                    |
|---------|-----------|-----------------------------------------------------------------------------------------|--------------|----------------|--------------|--------|------|---------|------------------------------------------------------------------------------------|
| 2334847 | DMBX1     | diencephalon/mesencephalon homeobox 1                                                   |              | 1p33           | NM_172225    | 127343 | 4.3  | 4.8E-20 |                                                                                    |
| 2373693 | LHX9      | LIM homeobox 9                                                                          | qRT-PCR, ISH | 1q31-q32       | NM_020204    | 56956  | 20.0 | 3.5E-43 |                                                                                    |
| 2702610 | SHOX2     | short stature homeobox 2                                                                |              | 3q25-q26.1     | NM_006884    | 6474   | 3.8  | 1.5E-41 |                                                                                    |
| 3597338 | TPM1      | tropomyosin 1 (alpha)                                                                   |              | 15q22.1        | NM_001018020 | 7168   | 2.3  | 2.8E-06 | 115196; 191010; 192600: Cardiomyopathy, familial hypertrophic, 3                   |
| 3676557 | CASKIN1   | CASK interacting protein 1                                                              |              | 16p13.3        | NM_020764    | 57524  | 2.0  | 1.3E-07 |                                                                                    |
| 3184408 | AKAP2     | A kinase (PRKA) anchor protein 2                                                        |              | 9q31-q33       | NM_001004065 | 445815 | 2.9  | 8.8E-12 |                                                                                    |
| 3228727 | SLC2A6    | solute carrier family 2 (facilitated glucose transporter) member 6                      |              | 9q34           | NM_017585    | 11182  | 2.2  | 2.8E-11 |                                                                                    |
| 3597125 | TLN2      | talin 2                                                                                 |              | 15q15-q21      | NM_015059    | 83660  | 2.2  | 2.0E-12 |                                                                                    |
| 3687277 | SEZ6L2    | seizure related 6 homolog (mouse)-like 2                                                |              | 16p11.2        | NM_012410    | 26470  | 2.2  | 2.9E-07 |                                                                                    |
| 3644309 | SYNGR3    | synaptogyrin 3                                                                          |              | 16p13          | NM_004209    | 9143   | 2.3  | 3.7E-07 |                                                                                    |
| 3868557 | SYT3      | synaptotagmin III                                                                       |              | 19q13.33       | NM_032298    | 84258  | 2.1  | 1.1E-08 |                                                                                    |
| 3875179 | CHGB      | chromogranin B (secretogranin 1)                                                        |              | 20pter-p12     | NM_001819    | 1114   | 3.7  | 9.4E-20 | schizophrenia (Iijima, Y. et al. 2004)                                             |
| 2333907 | C10orf164 | chromosome 1 open reading frame 164                                                     | qRT-PCR      | 1p34.1         | NM_018150    | 55182  | 2.6  | 5.8E-42 |                                                                                    |
| 3740201 | SKIP      | skeletal muscle and kidney enriched inositol phosphatase                                |              | 17p13.3        | NM_130766    | 5306   | 2.0  | 9.2E-13 |                                                                                    |
| 3863435 | POU2F2    | POU domain class 2 transcription factor 2                                               |              | 19q13.2        | NM_002698    | 5452   | 2.0  | 2.7E-21 |                                                                                    |
| 3557593 | ZNF409    | zinc finger protein 409                                                                 |              | 14q11.2        | BC131533     | 22830  | 2.5  | 1.5E-10 |                                                                                    |
| 3016262 | EMID2     | EMI domain containing 2                                                                 |              | 7q22.1         | NM_133457    | 136227 | 2.6  | 1.2E-11 |                                                                                    |
| 2585476 | SCN7A     | sodium channel voltage-gated type VII alpha                                             |              | 2q21-q23       | NM_002976    | 6332   | 2.6  | 7.0E-34 |                                                                                    |
| 3510450 | LHFP      | lipoma HMGIC fusion partner                                                             |              | 13q12          | NM_005780    | 10186  | 3.6  | 2.5E-10 |                                                                                    |
| 3623655 | HDC       | histidine decarboxylase                                                                 |              | 15q21-q22      | NM_002112    | 3067   | 2.4  | 4.8E-21 |                                                                                    |
| 3334446 | KCNK4     | potassium channel subfamily K member 4                                                  |              | 11q13          | NM_033310    | 50801  | 2.7  | 3.3E-15 |                                                                                    |
| 3611126 | MEF2A     | myocyte enhancer factor 2A                                                              |              | 15q26          | NM_005587    | 4205   | 2.5  | 3.5E-12 |                                                                                    |
| 3896976 | TXNDC13   | thioredoxin domain containing 13                                                        |              | 20p12          | NM_021156    | 56255  | 2.2  | 9.1E-08 |                                                                                    |
| 2766893 | APBB2     | amyloid beta (A4) precursor protein-binding family B member 2 (Fe65-like)               |              | 4p14-p13       | NM_173075    | 323    | 2.1  | 2.9E-08 |                                                                                    |
| 3549092 | CHGA      | chromogranin A (parathyroid secretory protein 1)                                        |              | 14q32          | NM_001275    | 1113   | 2.6  | 6.3E-14 | 602710: Alzheimer disease, late-onset<br>schizophrenia (Takahashi, N. et al. 2006) |
| 3868587 | SHANK1    | SH3 and multiple ankyrin repeat domains 1                                               |              | 19q13.3        | NM_016148    | 50944  | 2.4  | 1.8E-09 |                                                                                    |
| 3568616 | RAB15     | RAB15 member RAS oncogene family                                                        |              | 14q23.3        | NM_198686    | 376267 | 2.3  | 4.1E-10 |                                                                                    |
| 3737242 | SLC26A11  | solute carrier family 26 member 11                                                      |              | 17q25.3        | NM_173626    | 284129 | 2.1  | 7.9E-09 |                                                                                    |
| 3210616 | PRUNE2    | prune homolog 2 (Drosophila)                                                            |              | 9q21.13        | NM_138818    | 158471 | 2.6  | 6.9E-26 |                                                                                    |
| 3234277 | GATA3     | GATA binding protein 3                                                                  |              | 10p14          | NM_002051    | 2625   | 2.4  | 9.5E-20 | 131320; 146255: Hypoparathyroidism, sensorineural deafness, and renal dysplasia    |
| 3741547 | TAX1BP3   | Tax1 (human T-cell leukemia virus type I) binding protein 3                             |              | 17p13.3        | NM_014604    | 5026   | 2.4  | 9.8E-09 |                                                                                    |
| 3830205 | FXYP2     | FXYP domain containing ion transport regulator 7                                        |              | 19q13.12       | NM_022006    | 53822  | 2.8  | 1.7E-14 |                                                                                    |
| 2569215 | ST6GAL2   | ST6 beta-galactosidase alpha-2 6-sialyltransferase 2                                    |              | 2q11.2-q12.1   | NM_032528    | 84620  | 2.6  | 1.4E-08 |                                                                                    |
| 3451375 | PRICKLE1  | prickle homolog 1 (Drosophila)                                                          |              | 12q12          | NM_153026    | 144165 | 5.4  | 9.1E-28 |                                                                                    |
| 3169331 | ALDH1B1   | aldehyde dehydrogenase 1 family member B1                                               |              | 9p11.1         | NM_000692    | 219    | 2.1  | 1.4E-08 |                                                                                    |
| 2876897 | SPOCK1    | sparc/osteonectin cvcv and kazal-like domains proteoglycan (testican) 1                 |              | 8p21.2         | NM_004598    | 440258 | 3.1  | 1.1E-08 |                                                                                    |
| 3533811 | LRFN5     | leucine rich repeat and fibronectin type III domain containing 5                        |              | 14q21.2        | NM_152447    | 145581 | 2.3  | 1.4E-06 |                                                                                    |
| 3090436 | NEFM      | neurofilament medium polypeptide 150kDa                                                 |              | 8p21           | NM_005382    | 4741   | 6.0  | 1.0E-08 | psychoses schizophrenia (Strous, R. D. et al. 2006)                                |
| 3634509 | CIB2      | calcium and integrin binding family member 2                                            |              | 15q24          | NM_006383    | 10518  | 2.0  | 2.8E-09 |                                                                                    |
| 3636391 | HOMER2    | homer homolog 2 (Drosophila)                                                            |              | 15q24.3        | NM_199332    | 9455   | 4.3  | 1.8E-21 |                                                                                    |
| 2577482 | TMEM163   | transmembrane protein 163                                                               |              | 2q21.3         | NM_030923    | 81615  | 4.0  | 6.2E-13 |                                                                                    |
| 3323824 | SLC17A6   | solute carrier family 17 (sodium-dependent inorganic phosphate cotransporter) member 6  |              | 11p14.3        | NM_020346    | 57084  | 13.8 | 2.8E-21 |                                                                                    |
| 3554452 | KIAA0284  | KIAA0284                                                                                |              | 14q32.33       | NM_015005    | 283638 | 2.5  | 6.6E-09 |                                                                                    |
| 3834257 | CEACAM21  | carcinoembryonic antigen-related cell adhesion molecule 21                              |              | 19q13.2        | NM_033543    | 90273  | 2.1  | 2.9E-23 |                                                                                    |
| 4052021 | SLC2A6    | solute carrier family 2 (facilitated glucose transporter) member 6                      |              | 9q34           | NM_017585    | 11182  | 2.0  | 3.2E-10 |                                                                                    |
| 3572929 | ZDHHC22   | zinc finger DHHC-type containing 22                                                     | qRT-PCR      | 14q24.3        | NM_174976    | 283576 | 4.0  | 6.0E-13 |                                                                                    |
| 3859668 | LG14      | leucine-rich repeat LG1 family member 4                                                 |              | 19q13.12       | NM_139284    | 163175 | 3.7  | 4.6E-09 | epilepsy (Gu, W. et al. 2003)                                                      |
| 3570373 | SLC8A3    | solute carrier family 8 (sodium-calcium exchanger) member 3                             |              | 14q24.1        | NM_182932    | 6547   | 2.3  | 7.6E-08 |                                                                                    |
| 4020655 | ODZ1      | odz odd Oz/ten-m homolog 1 (Drosophila)                                                 |              | Xq25           | NM_014253    | 10178  | 3.6  | 1.4E-09 |                                                                                    |
| 3922664 | SLC37A1   | solute carrier family 37 (glycerol-3-phosphate transporter) member 1                    |              | 21q22.3        | NM_018964    | 54020  | 2.0  | 2.5E-13 |                                                                                    |
| 3772661 | TIMP2     | TIMP metalloproteinase inhibitor 2                                                      |              | 17q25          | NM_003255    | 7077   | 2.0  | 2.7E-06 |                                                                                    |
| 3376914 | NRXN2     | neurexin 2                                                                              |              | 11q13          | NM_015080    | 9379   | 2.4  | 6.6E-09 |                                                                                    |
| 2394608 | GPR153    | G protein-coupled receptor 153                                                          |              | 1p36.31        | NM_207370    | 387509 | 3.2  | 3.1E-12 |                                                                                    |
| 3401086 | CACNA1C   | calcium channel voltage-dependent L type alpha 1C subunit                               |              | 12p13.33       | NM_000719    | 283439 | 2.0  | 4.6E-09 |                                                                                    |
| 2883440 | ADAM19    | ADAM metalloproteinase domain 19 (meltrin beta)                                         |              | 5q32-q33       | NM_033274    | 8728   | 2.1  | 4.7E-12 |                                                                                    |
| 3947863 | PARVB     | parvin beta                                                                             |              | 22q13.2-q13.33 | NM_013327    | 29780  | 2.1  | 2.1E-10 |                                                                                    |
| 3260586 | SCD       | stearoyl-CoA desaturase (delta-9-desaturase)                                            |              | 10q23-q24      | NM_005063    | 6319   | 2.2  | 1.7E-07 |                                                                                    |
| 3554315 | C14orf173 | chromosome 14 open reading frame 173                                                    |              | 14q32.33       | NM_022489    | 64423  | 2.0  | 3.5E-06 |                                                                                    |
| 2418078 | NEGR1     | neuronal growth regulator 1                                                             |              | 1p31.1         | NM_173808    | 257194 | 3.7  | 2.2E-09 |                                                                                    |
| 3409127 | ARNTL2    | aryl hydrocarbon receptor nuclear translocator-like 2                                   |              | 12p12.2-p11.2  | NM_020183    | 56938  | 2.8  | 8.0E-06 |                                                                                    |
| 3081862 | PTPRN2    | protein tyrosine phosphatase receptor type N polypeptide 2                              |              | 7q36.3         | NM_002847    | 393078 | 2.3  | 6.7E-07 |                                                                                    |
| 2429371 | TSPAN2    | tetraspanin 2                                                                           | qRT-PCR      | 1p13.2         | NM_005725    | 10100  | 3.9  | 9.4E-11 |                                                                                    |
| 2451870 | ETNK2     | ethanolamine kinase 2                                                                   |              | 1q32.1         | NM_018208    | 55224  | 3.6  | 4.2E-18 |                                                                                    |
| 3805553 | RIT2      | Ras-like without CAAX 2                                                                 |              | 18q12.3        | NM_002930    | 6014   | 4.8  | 3.7E-11 |                                                                                    |
| 3463727 | LIN7A     | lin-7 homolog A (C. elegans)                                                            |              | 12q21          | NM_004664    | 8825   | 2.2  | 2.6E-15 |                                                                                    |
| 2436826 | KCNN3     | potassium intermediate/small conductance calcium-activated channel subfamily N member 3 |              | 1q21.3         | NM_170782    | 3782   | 2.0  | 4.8E-11 | schizophrenia; bipolar disorder (Glatt, S. J. et al. 2003)                         |
| 2329887 | NCDN      | neurochondrin                                                                           |              | 1p34.3         | NM_001014839 | 23154  | 2.1  | 1.0E-07 |                                                                                    |
| 3818047 | HSD11B1L  | hydroxysteroid (11-beta) dehydrogenase 1-like                                           |              | 19p13.3        | NM_198706    | 374875 | 2.1  | 1.0E-12 |                                                                                    |
| 2407314 | EPHA10    | EPH receptor A10                                                                        | qRT-PCR      | 1p34.3         | BC041360     | 284656 | 2.0  | 1.1E-11 |                                                                                    |
| 3191352 | FREQ      | frequenin homolog (Drosophila)                                                          |              | 9q34           | NM_014286    | 23413  | 2.4  | 1.5E-09 |                                                                                    |
| 3371225 | CHST1     | carbohydrate (keratan sulfate Gal-6) sulfotransferase 1                                 |              | 11p11.2-p11.1  | NM_003654    | 8534   | 4.1  | 1.9E-16 |                                                                                    |
| 3381925 | PGM2L1    | phosphoglucomutase 2-like 1                                                             | qRT-PCR, ISH | 11q13.4        | NM_173582    | 283209 | 3.7  | 4.8E-11 |                                                                                    |
| 3204558 | KIAA1539  | KIAA1539                                                                                |              | 9p13.3         | NM_025182    | 80256  | 2.3  | 1.3E-14 |                                                                                    |
| 3841076 | MYADM     | myeloid-associated differentiation marker                                               |              | 19q13.41       | NM_001020819 | 91663  | 2.0  | 6.8E-07 |                                                                                    |
| 3667508 | CALB2     | calbindin 2 29kDa (calretinin)                                                          | IHC          | 16q22.2        | NM_001740    | 794    | 16.7 | 1.4E-28 |                                                                                    |
| 3660213 | CYLD      | cylindromatosis (turban tumor syndrome)                                                 |              | 16q12.1        | NM_015247    | 1540   | 2.3  | 4.4E-11 | 132700; 605018: Cylindromatosis, familial                                          |
| 3232349 | PFKP      | phosphofructokinase platelet                                                            |              | 10p15.3-p15.2  | NM_002627    | 5214   | 2.3  | 8.6E-11 |                                                                                    |

#### Cluster 5: CBL

| Transcript | Official Gene |           |              |          |                  |               |                     |                                |                                                   |
|------------|---------------|-----------|--------------|----------|------------------|---------------|---------------------|--------------------------------|---------------------------------------------------|
| Cluster ID | Symbol        | Gene Name | Confirmation | Cytoband | RefSeq Accession | Entrez GeneID | Maximum Fold Change | p-value (False Discovery Rate) | OMIM and Genetic Association Database annotations |

|         |           |                                                                                       |               |           |        |      |         |                                                                                     |
|---------|-----------|---------------------------------------------------------------------------------------|---------------|-----------|--------|------|---------|-------------------------------------------------------------------------------------|
| 2398706 | MFAP2     | microfibrillar-associated protein 2                                                   | 1p36.1-p35    | NM_002403 | 4237   | 3.7  | 1.5E-07 |                                                                                     |
| 3248289 | CDC2      | cell division cycle 2 G1 to S and G2 to M                                             | 10q21.1       | NM_001786 | 983    | 2.5  | 5.0E-06 | Alzheimer's disease; dementia (Johansson, A. et al. 2003)                           |
| 2333136 | CDC20     | cell division cycle 20 homolog (S. cerevisiae)                                        | 1p34.1        | NM_001255 | 991    | 2.2  | 5.6E-06 |                                                                                     |
| 2894573 | GCNT2     | glucosaminyl (N-acetyl) transferase 2 I-branching enzyme (I blood group)              | 8q24          | NM_145649 | 10086  | 2.5  | 3.4E-16 |                                                                                     |
| 3061319 | CDK6      | cyclin-dependent kinase 6                                                             | 7q21-q22      | NM_001259 | 1021   | 3.0  | 2.7E-12 |                                                                                     |
| 3387010 | GPR83     | G protein-coupled receptor 83                                                         | 11q21         | NM_016540 | 10888  | 3.1  | 3.0E-30 |                                                                                     |
| 3815165 | PTBP1     | polypyrimidine tract binding protein 1                                                | 19p13.3       | NM_031991 | 5725   | 2.3  | 1.0E-07 |                                                                                     |
| 3775842 | TYMS      | thymidylate synthetase                                                                | 18p11.32      | NM_001071 | 7298   | 3.3  | 5.2E-07 |                                                                                     |
| 2746693 | ARHGAP10  | Rho GTPase activating protein 10                                                      | 4q31.23       | NM_024605 | 79658  | 2.5  | 1.9E-28 |                                                                                     |
| 2593159 | STK17B    | serine/threonine kinase 17b                                                           | 2q32.3        | NM_004226 | 9262   | 2.2  | 2.2E-13 |                                                                                     |
| 3108146 | SDC2      | syndecan 2                                                                            | 8q22-q23      | NM_002998 | 6383   | 3.5  | 2.0E-14 |                                                                                     |
| 2767710 | KCTD8     | potassium channel tetramerisation domain containing 8                                 | 4p13          | NM_198353 | 386617 | 3.7  | 1.2E-22 |                                                                                     |
| 3634656 | CHRNA3    | cholinergic receptor nicotinic alpha 3                                                | 15q24         | NM_000743 | 1136   | 2.6  | 2.1E-25 |                                                                                     |
| 2859667 | ADAMTS6   | ADAM metalloproteinase with thrombospondin type 1 motif 6                             | 5q12.3        | NM_197941 | 11174  | 2.2  | 2.3E-06 |                                                                                     |
| 3230141 | NOTCH1    | Notch homolog 1 translocation-associated (Drosophila)                                 | 9q34.3        | NM_017617 | 4851   | 2.1  | 8.3E-07 |                                                                                     |
| 3378159 | YIF1A     | Yip1 interacting factor homolog A (S. cerevisiae)                                     | 11q13         | NM_020470 | 10897  | 2.0  | 9.9E-12 |                                                                                     |
| 3663228 | GINS3     | GINS complex subunit 3 (Psf3 homolog)                                                 | 16q21         | NM_022770 | 64785  | 2.4  | 5.5E-19 |                                                                                     |
| 3904566 | DSN1      | DSN1 MIND kinetochore complex component homolog (S. cerevisiae)                       | 20q11.23      | NM_024918 | 79980  | 2.0  | 2.2E-09 |                                                                                     |
| 2351004 | GSTM5     | glutathione S-transferase M5                                                          | 1p13.3        | NM_000851 | 2949   | 2.0  | 3.8E-06 |                                                                                     |
| 2401347 | TCEA3     | transcription elongation factor A (SII) 3                                             | 1p36.12       | NM_003196 | 6920   | 2.3  | 4.5E-22 |                                                                                     |
| 3065740 | RELN      | reelin                                                                                | 7q22          | NM_173054 | 5649   | 7.9  | 4.4E-24 | 257320; 600514; Lissencephaly syndrome, Norman-Roberts type                         |
| 3173673 | PIP5K1B   | phosphatidylinositol-4-phosphate 5-kinase type I beta                                 | 9q13          | NM_003558 | 8395   | 2.9  | 2.1E-17 |                                                                                     |
| 2762944 | KCNIP4    | Kv channel interacting protein 4                                                      | 4p15.31       | NM_025221 | 80333  | 7.3  | 1.1E-20 |                                                                                     |
| 3221822 | KIF12     | kinesin family member 12                                                              | 9q32          | NM_138424 | 113220 | 2.4  | 7.2E-19 |                                                                                     |
| 2909948 | TFAP2B    | transcription factor AP-2 beta (activating enhancer binding protein 2 beta)           | 6p21-p12      | NM_003221 | 7021   | 5.5  | 1.0E-12 | 169100; 601601; Char syndrome                                                       |
| 3927392 | CYYR1     | cysteine/tyrosine-rich 1                                                              | 21q21.2       | NM_052954 | 116159 | 2.2  | 1.1E-09 |                                                                                     |
| 2451261 | SYT2      | synaptotagmin II                                                                      | 15q13.2       | NM_177402 | 390558 | 3.9  | 6.2E-23 |                                                                                     |
| 3698866 | LOC348174 | secretory protein LOC348174                                                           | 16q22.1       | NM_182619 | 348174 | 3.3  | 9.7E-28 |                                                                                     |
| 3929291 | C21orf59  | chromosome 21 open reading frame 59                                                   | 7q21.3        | NM_021254 | 441269 | 2.1  | 2.2E-15 |                                                                                     |
| 3144033 | CALB1     | calbindin 1 28kDa                                                                     | 8q21.3-q22.1  | NM_004929 | 793    | 15.0 | 6.7E-14 |                                                                                     |
| 2827299 | MEGF10    | multiple EGF-like-domains 10                                                          | 5q33          | NM_032446 | 84466  | 4.9  | 2.9E-15 |                                                                                     |
| 2855285 | SEPP1     | selenoprotein P plasma 1                                                              | 5q31          | NM_005410 | 6414   | 3.2  | 9.7E-19 |                                                                                     |
| 4015397 | TSPAN6    | tetraspanin 6                                                                         | Xq22          | NM_003270 | 7105   | 2.2  | 2.2E-06 |                                                                                     |
| 2728408 | REST      | RE1-silencing transcription factor                                                    | 4q12          | NM_005612 | 5978   | 2.2  | 3.4E-09 |                                                                                     |
| 2884578 | CCN1L     | cyclin J-like                                                                         | 5q33.3        | NM_024565 | 79616  | 2.2  | 9.5E-21 |                                                                                     |
| 3197955 | GLDC      | glycine dehydrogenase (decarboxylating)                                               | 9p22          | NM_000170 | 2731   | 2.5  | 6.3E-17 | 238300; 605899; Glycine encephalopathy                                              |
| 2745547 | GAB1      | GRB2-associated binding protein 1                                                     | 4q31.21       | NM_002039 | 2549   | 2.9  | 2.0E-07 |                                                                                     |
| 3887452 | SLC2A10   | solute carrier family 2 (facilitated glucose transporter) member 10                   | 20q13.1       | NM_030777 | 81031  | 2.1  | 1.3E-07 |                                                                                     |
| 3867796 | TEAD2     | TEA domain family member 2                                                            | 19q13.33      | NM_003598 | 8463   | 2.3  | 1.9E-06 |                                                                                     |
| 3257031 | STAMBPL1  | STAM binding protein-like 1                                                           | 10q24.1       | NM_020799 | 355    | 2.0  | 4.5E-07 |                                                                                     |
| 3417146 | CDK2      | cyclin-dependent kinase 2                                                             | 12q13         | NM_052827 | 1017   | 2.6  | 5.9E-08 |                                                                                     |
| 3927480 | ADAMTS5   | ADAM metalloproteinase with thrombospondin type 1 motif 5 (aggrecanase-2)             | 21q21.3       | NM_007038 | 11096  | 2.1  | 5.5E-14 |                                                                                     |
| 2441940 | LMX1A     | LIM homeobox transcription factor 1 alpha                                             | 1q22-q23      | NM_177398 | 4009   | 2.6  | 5.2E-12 | 608380; 608381; Retinitis pigmentosa-26                                             |
| 2590452 | CERKL     | ceramide kinase-like                                                                  | 2q31.3        | NM_201548 | 375298 | 6.8  | 1.6E-43 |                                                                                     |
| 2339872 | ROR1      | receptor tyrosine kinase-like orphan receptor 1                                       | 1p32-p31      | NM_005012 | 4919   | 2.7  | 7.1E-27 |                                                                                     |
| 2841964 | MSX2      | msh homeobox 2                                                                        | 9q34-q35      | NM_002449 | 4488   | 5.2  | 1.1E-35 |                                                                                     |
| 2925237 | LAMA2     | laminin alpha 2 (merosin congenital muscular dystrophy)                               | 8p21.2        | NM_000426 | 440258 | 2.1  | 1.3E-16 |                                                                                     |
| 3390195 | EXPH5     | exophilin 5                                                                           | 11q22.3       | NM_015065 | 23086  | 2.9  | 5.8E-22 |                                                                                     |
| 3199511 | FREM1     | FRAS1 related extracellular matrix 1                                                  | 9p22.3        | NM_144966 | 158326 | 2.4  | 2.6E-26 |                                                                                     |
| 2391465 | MXRA8     | matrix-remodelling associated 8                                                       | 1p36.33       | NM_032348 | 388763 | 2.4  | 2.7E-08 |                                                                                     |
| 3457101 | ITGA7     | integrin alpha 7                                                                      | 12q13         | NM_002206 | 3679   | 2.0  | 6.9E-24 | 600536; Myopathy, congenital                                                        |
| 3367788 | DCDC5     | doublecortin domain containing 5                                                      | 11p14.1       | NM_198462 | 196296 | 4.0  | 1.3E-39 |                                                                                     |
| 3571059 | DPP3      | D4 zinc and double PHD fingers family 3                                               | 14q24.3-q31.1 | NM_012074 | 8110   | 3.8  | 1.2E-18 |                                                                                     |
| 3768627 | ABCA8     | ATP-binding cassette sub-family A (ABC1) member 8                                     | 17q24         | NM_007168 | 10351  | 3.6  | 2.8E-32 |                                                                                     |
| 2358092 | CA14      | carbonic anhydrase XIV                                                                | 1q21          | NM_012113 | 23632  | 2.7  | 1.3E-18 |                                                                                     |
| 259189  | CYP26B1   | cytochrome P450 family 26 subfamily B polypeptide 1                                   | 2p13.3        | NM_019885 | 56603  | 9.6  | 2.4E-19 |                                                                                     |
| 3474372 | PXN       | paxillin                                                                              | 12q24.31      | NM_002859 | 5829   | 2.0  | 1.0E-12 |                                                                                     |
| 2427469 | SLC16A4   | solute carrier family 16 member 4 (monocarboxylic acid transporter 5)                 | 1p13.3        | NM_004696 | 9122   | 2.8  | 2.5E-24 |                                                                                     |
| 3792656 | CCDC102B  | coiled-coil domain containing 102B                                                    | 18q22.1       | NM_024781 | 79839  | 2.0  | 3.7E-20 |                                                                                     |
| 3023149 | FLNC      | filamin C gamma (actin binding protein 280)                                           | 7q32-q35      | NM_001458 | 2318   | 4.1  | 5.8E-31 |                                                                                     |
| 3225855 | ANGPTL2   | angiopoietin-like 2                                                                   | 9q34          | NM_012098 | 23452  | 2.8  | 6.1E-13 |                                                                                     |
| 3529908 | NFATC4    | nuclear factor of activated T-cells cytoplasmic calcineurin-dependent 4               | 14q11.2       | NM_004554 | 4776   | 2.6  | 1.2E-10 |                                                                                     |
| 3188514 | CRB2      | crumbs homolog 2 (Drosophila)                                                         | 9q33.2        | NM_173689 | 286204 | 2.1  | 3.4E-12 |                                                                                     |
| 3132016 | FGFR1     | fibroblast growth factor receptor 1 (fms-related tyrosine kinase 2 Pfeiffer syndrome) | 8p11.21       | NM_023111 | 2260   | 3.1  | 3.1E-11 |                                                                                     |
| 3292169 | CTNNA3    | catenin (cadherin-associated protein) alpha 3                                         | 10q22.2       | NM_013266 | 29119  | 4.5  | 4.1E-30 | Alzheimer's disease (Bertram, L. et al. 2007)                                       |
| 2924492 | HEY2      | hair/enhancer-of-split related with YRPW motif 2                                      | 6q22.2-q22.33 | NM_012259 | 23493  | 7.4  | 1.3E-31 |                                                                                     |
| 2704267 | GOLPH4    | golgi phosphoprotein 4                                                                | 3q26.2        | NM_014498 | 27333  | 2.0  | 5.6E-06 |                                                                                     |
| 4022447 | GPC3      | glypican 3                                                                            | Xq26.1        | NM_004484 | 2719   | 3.3  | 5.6E-24 | 300037; 312870; Simpson-Golabi-Behmelt syndrome, type 1; Wilms tumor, somatic       |
| 3542275 | SMOC1     | SPARC related modular calcium binding 1                                               | 14q24.2       | NM_022137 | 64093  | 4.8  | 2.5E-18 |                                                                                     |
| 3918104 | C21orf63  | chromosome 21 open reading frame 63                                                   | 21q22.11      | NM_058187 | 59271  | 2.1  | 5.3E-15 |                                                                                     |
| 2939469 | C6orf145  | chromosome 6 open reading frame 145                                                   | 6p25.2        | AJ420534  | 221749 | 2.4  | 6.5E-13 |                                                                                     |
| 3427352 | NEDD1     | neural precursor cell expressed developmentally down-regulated 1                      | 12q22         | NM_152905 | 121441 | 2.2  | 9.3E-06 |                                                                                     |
| 3837731 | EMP3      | epithelial membrane protein 3                                                         | 19q13.3       | NM_001425 | 2014   | 2.8  | 1.5E-18 |                                                                                     |
| 2337407 | PCSK9     | proprotein convertase subtilisin/kexin type 9                                         | 1p32.3        | NM_174936 | 255738 | 3.2  | 1.0E-14 |                                                                                     |
| 3406880 | PIK3C2G   | phosphoinositide-3-kinase class 2 gamma polypeptide                                   | 12p12         | NM_004570 | 5288   | 2.5  | 1.1E-20 |                                                                                     |
| 3417988 | NXPH4     | neurexophilin 4                                                                       | 12q13.3       | NM_007224 | 11247  | 4.6  | 5.0E-11 |                                                                                     |
| 2324919 | EPHB2     | EPH receptor B2                                                                       | 1p36.1-p35    | NM_004442 | 2048   | 2.1  | 1.4E-08 |                                                                                     |
| 3260700 | PAX2      | paired box gene 2                                                                     | 10q24         | NM_003988 | 5076   | 5.9  | 1.9E-25 | 120330; 167409; Optic nerve coloboma with renal disease; Renal hypoplasia, isolated |
| 2884727 | ATP10B    | ATPase Class V type 10B                                                               | 5q34          | AK025130  | 23120  | 2.5  | 2.4E-21 |                                                                                     |
| 3128411 | EBF2      | early B-cell factor 2                                                                 | 8p21.2        | NM_022659 | 64641  | 2.8  | 8.3E-18 |                                                                                     |
| 3487095 | DGKH      | diacylglycerol kinase eta                                                             | 13q14.11      | NM_178009 | 160851 | 4.5  | 2.2E-20 | bipolar disorder (Baum, A. E. et al. 2007)                                          |
| 3853036 | SLC1A6    | solute carrier family 1 (high affinity aspartate/glutamate transporter) member 6      | 19p13.12      | NM_005071 | 6511   | 2.9  | 9.3E-16 |                                                                                     |
| 3622282 | SHF       | Src homology 2 domain containing F                                                    | 15q21.1       | NM_138356 | 90525  | 2.3  | 1.3E-09 |                                                                                     |

|         |           |                                                                                         |               |              |        |      |         |                                                                                       |
|---------|-----------|-----------------------------------------------------------------------------------------|---------------|--------------|--------|------|---------|---------------------------------------------------------------------------------------|
| 2733360 | FGF5      | fibroblast growth factor 5                                                              | 4q21          | NM_004464    | 2250   | 5.5  | 1.9E-26 |                                                                                       |
| 2647015 | AGTR1     | angiotensin II receptor type 1                                                          | 3q21-q25      | NM_031850    | 185    | 2.6  | 1.0E-30 |                                                                                       |
| 2784177 | TRPC3     | transient receptor potential cation channel subfamily C member 3                        | 4q27          | NM_003305    | 7222   | 5.2  | 2.3E-25 |                                                                                       |
| 2890660 | GFPT2     | glutamine-fructose-6-phosphate transaminase 2                                           | 5q34-q35      | NM_005110    | 9945   | 2.2  | 4.6E-13 |                                                                                       |
| 2589017 | PDE11A    | phosphodiesterase 11A                                                                   | 2q31.2        | NM_001077358 | 50940  | 3.0  | 1.1E-39 |                                                                                       |
| 3447022 | ST8SIA1   | ST8 alpha-N-acetylneuraminide alpha-2 8-sialyltransferase 1                             | 12p12.1-p11.2 | NM_003034    | 6489   | 2.2  | 3.2E-06 |                                                                                       |
| 2600881 | PAX3      | paired box gene 3 (Waardenburg syndrome 1)                                              | 2q35-q37      | NM_181458    | 5077   | 6.5  | 3.2E-33 | 122880; 148820; 193500; 268220; 606597; Waardenburg syndrome                          |
| 2941476 | TFAP2A    | transcription factor AP-2 alpha (activating enhancer binding protein 2 alpha)           | 6p24          | NM_003220    | 7020   | 5.2  | 6.4E-47 |                                                                                       |
| 3810446 | CPLX4     | complexin 4                                                                             | 18q21.32      | NM_181654    | 339302 | 5.1  | 4.7E-51 |                                                                                       |
| 2838399 | GABRA6    | gamma-aminobutyric acid (GABA) A receptor alpha 6                                       | 5q34          | NM_000811    | 2559   | 3.0  | 5.5E-43 | anxiety disorder; blood pressure, arterial; memory impairment (Uhart, M. et al. 2004) |
| 3210737 | GNA14     | guanine nucleotide binding protein (G protein) alpha 14                                 | 9q21          | NM_004297    | 9630   | 2.3  | 8.8E-34 |                                                                                       |
| 3323491 | SLC6A5    | solute carrier family 6 (neurotransmitter transporter glycine) member 5                 | 11p15.2-p15.1 | NM_004211    | 9152   | 3.7  | 6.2E-36 |                                                                                       |
| 3611625 | ALDH1A3   | aldehyde dehydrogenase 1 family member A3                                               | 15q26.3       | NM_000693    | 220    | 4.3  | 5.1E-47 |                                                                                       |
| 3986087 | NRK       | Nik related kinase                                                                      | Xq22.3        | NM_198465    | 203447 | 4.9  | 2.1E-44 |                                                                                       |
| 3332465 | MS4A8B    | membrane-spanning 4-domains subfamily A member 8B                                       | 11q12.2       | NM_031457    | 83661  | 2.9  | 3.2E-27 |                                                                                       |
| 3338293 | TMEM16A   | transmembrane protein 16A                                                               | 11q13.3       | NM_018043    | 55107  | 2.1  | 1.6E-23 |                                                                                       |
| 2612508 | GALNTL2   | UDP-N-acetyl-alpha-D-galactosamine:polypeptide N-acetylgalactosaminyltransferase-like 2 | 3p24.3        | NM_054110    | 117248 | 3.5  | 2.8E-28 |                                                                                       |
| 3057955 | FGL2      | fibrinogen-like 2                                                                       | 7q11.23       | NM_006682    | 10875  | 4.3  | 7.2E-41 |                                                                                       |
| 3405748 | EMP1      | epithelial membrane protein 1                                                           | 12p12.3       | NM_001423    | 2012   | 3.2  | 1.7E-30 |                                                                                       |
| 2750753 | TLL1      | tolloid-like 1                                                                          | 4q32-q33      | NM_012464    | 7092   | 6.5  | 5.0E-24 |                                                                                       |
| 3137120 | CA8       | carbonic anhydrase VIII                                                                 | 8q11-q12      | NM_004056    | 767    | 13.8 | 2.8E-37 |                                                                                       |
| 3764399 | RNF43     | ring finger protein 43                                                                  | 17q22         | NM_017763    | 54894  | 2.5  | 2.2E-31 |                                                                                       |
| 3445741 | MGP       | matrix Gla protein                                                                      | 12p13.1-p12.3 | NM_000900    | 4256   | 3.7  | 8.6E-43 | 154870; 245150; Keutel syndrome                                                       |
| 3666989 | MGC34761  | hypothetical protein MGC34761                                                           | 16q22.3       | NM_173619    | 441773 | 3.0  | 7.9E-34 |                                                                                       |
| 3696035 | LCAT      | lecithin-cholesterol acyltransferase                                                    | 16q22.1       | NM_000229    | 3931   | 9.6  | 3.1E-40 | 136120; 245900; 606967; Fish-eye disease; Norum disease                               |
| 2646327 | C3orf58   | chromosome 3 open reading frame 58                                                      | 3q24          | NM_173552    | 205428 | 2.5  | 1.8E-06 |                                                                                       |
| 3368054 | PAX6      | paired box gene 6 (aniridia keratitis)                                                  | 11p13         | NM_001604    | 5080   | 7.7  | 5.9E-12 |                                                                                       |
| 3758510 | ETV4      | ets variant gene 4 (E1A enhancer binding protein E1AF)                                  | 17q21         | NM_001986    | 2118   | 2.5  | 1.1E-17 |                                                                                       |
| 2742224 | SPRY1     | sprouty homolog 1 antagonist of FGF signaling (Drosophila)                              | 4q28.1        | NM_005841    | 10252  | 2.1  | 2.4E-07 |                                                                                       |
| 3725685 | NGFR      | nerve growth factor receptor (TNFR superfamily member 16)                               | 17q21-q22     | NM_002507    | 4804   | 5.0  | 1.2E-10 | depressive disorder, major; suicide (Kunugi, H. et al. 2004)                          |
| 3532511 | INSM2     | insulinoma-associated 2                                                                 | 14q13.2       | NM_032594    | 84684  | 2.3  | 1.5E-13 |                                                                                       |
| 2809399 | FST       | folliculin                                                                              | 5q11.2        | NM_013409    | 10468  | 3.3  | 4.1E-15 |                                                                                       |
| 3883941 | TGIF2     | TGFB-induced factor homeobox 2                                                          | 20q11.2-q12   | NM_021809    | 60436  | 2.7  | 1.0E-08 |                                                                                       |
| 3368940 | ABTB2     | ankyrin repeat and BTB (POZ) domain containing 2                                        | 11p13         | NM_145804    | 25841  | 2.0  | 2.3E-12 |                                                                                       |
| 3418120 | GLI1      | glioma-associated oncogene homolog 1 (zinc finger protein)                              | 12q13.2-q13.3 | NM_005269    | 2735   | 2.1  | 1.7E-09 |                                                                                       |
| 2899152 | HIST1H2AC | histone cluster 1 H2ac                                                                  | 6p21.3        | NM_003512    | 8334   | 2.3  | 1.9E-06 |                                                                                       |
| 3145149 | TP53INP1  | tumor protein p53 inducible nuclear protein 1                                           | 8q22          | NM_033285    | 94241  | 2.4  | 3.8E-06 |                                                                                       |
| 3393311 | DSCAML1   | Down syndrome cell adhesion molecule like 1                                             |               | NM_020693    | 57453  | 2.4  | 7.2E-19 |                                                                                       |
| 3729528 | PPM1D     | protein phosphatase 1D magnesium-dependent delta isoform                                | 17q23.2       | NM_003620    | 8493   | 2.2  | 8.4E-08 |                                                                                       |
| 3135046 | ST18      | suppression of tumorigenicity 18 (breast carcinoma) (zinc finger protein)               | 8q11.23       | NM_014682    | 9705   | 6.7  | 4.2E-11 |                                                                                       |
| 2597552 | ERBB4     | v-erb-a erythroblastic leukemia viral oncogene homolog 4 (avian)                        | 1q21          | NM_005235    | 6232   | 3.8  | 6.0E-06 | schizophrenia (Benzel, I. et al. 2007)                                                |
| 3428268 | GAS2L3    | growth arrest-specific 2 like 3                                                         | Xp22.1        | NM_174942    | 5277   | 6.7  | 7.5E-13 |                                                                                       |
| 2842255 | CPLX2     | complexin 2                                                                             | 5q35.2        | NM_001008220 | 10814  | 4.8  | 7.8E-11 |                                                                                       |
| 3936167 | CECR2     | cat eye syndrome chromosome region candidate 2                                          | 22q11.2       | AF336133     | 27443  | 2.9  | 1.2E-10 |                                                                                       |
| 3157596 | EEF1D     | eukaryotic translation elongation factor 1 delta (guanine nucleotide exchange protein)  | 8q24.3        | NM_032378    | 1936   | 2.9  | 7.4E-07 |                                                                                       |
| 3595096 | TCF12     | transcription factor 12 (HTF4 helix-loop-helix transcription factors 4)                 | 15q21         | NM_207038    | 6938   | 2.7  | 6.4E-10 |                                                                                       |
| 3959388 | APOL4     | apolipoprotein L 4                                                                      | 22q11.2-q13.2 | NM_030643    | 80832  | 3.9  | 9.6E-09 | 607254; Schizophrenia                                                                 |
| 3044597 | PDE1C     | phosphodiesterase 1C calmodulin-dependent 70kDa                                         | 7p15.1-p14.3  | NM_005020    | 5137   | 4.4  | 9.5E-13 |                                                                                       |
| 3828278 | ZNF536    | zinc finger protein 536                                                                 | 19q12         | NM_014717    | 388528 | 3.4  | 1.2E-15 |                                                                                       |
| 3925639 | NRIP1     | nuclear receptor interacting protein 1                                                  | 21q11.2       | NM_003489    | 8204   | 2.0  | 7.9E-06 |                                                                                       |
| 2973856 | SAMD3     | sterile alpha motif domain containing 3                                                 | 6q23.1        | NM_001017373 | 154075 | 2.3  | 5.3E-08 |                                                                                       |
| 3717870 | TMEM98    | transmembrane protein 98                                                                | 17q11.2       | NM_001033504 | 26022  | 2.8  | 8.3E-07 |                                                                                       |
| 2842194 | CPLX2     | complexin 2                                                                             | 5q35.2        | NM_006650    | 10814  | 4.0  | 7.1E-10 |                                                                                       |
| 3830925 | KIRREL2   | kin of IRRE like 2 (Drosophila)                                                         | 19q13.12      | NM_199179    | 84063  | 2.1  | 7.4E-08 |                                                                                       |
| 3418007 | SHMT2     | serine hydroxymethyltransferase 2 (mitochondrial)                                       | 12q12-q14     | NM_005412    | 6472   | 2.3  | 3.4E-07 |                                                                                       |
| 3928668 | TIAM1     | T-cell lymphoma invasion and metastasis 1                                               | 21q22.1       | NM_003253    | 7074   | 3.0  | 4.3E-12 |                                                                                       |
| 3944147 | MCM5      | minichromosome maintenance complex component 5                                          | 22q13.1       | NM_006739    | 4174   | 2.9  | 6.4E-07 |                                                                                       |

**Table S7. Gene lists for intra-NCTX clusters illustrated in Figure 3a**

| Exon Array<br>Transcript<br>Cluster ID | Official Gene<br>Symbol | Gene Name                                                                              | Confirmation              | Cytoband        | RefSeq<br>Accession | Entrez<br>GeneID | Maximum<br>Fold Change | corrected p-<br>value (False<br>Discovery Rate) | OMIM and Genetic Association Database annotations<br><small>Numbered annotations refer to OMIM; references are retrieved from the NCBI GAD at<br/>geneticassociationdb.nih.gov</small> |
|----------------------------------------|-------------------------|----------------------------------------------------------------------------------------|---------------------------|-----------------|---------------------|------------------|------------------------|-------------------------------------------------|----------------------------------------------------------------------------------------------------------------------------------------------------------------------------------------|
| <b>Cluster 1: PFC (MS)</b>             |                         |                                                                                        |                           |                 |                     |                  |                        |                                                 |                                                                                                                                                                                        |
| 3450655                                | CPNE8                   | copine VIII                                                                            | qRT-PCR                   | 12q12           | NM_153634           | 144402           | 3.4                    | 1.1E-16                                         |                                                                                                                                                                                        |
| 3571059                                | DPPF3                   | D4 zinc and double PHD fingers family 3                                                |                           | 14q24.3-q31.1   | NM_012074           | 8110             | 1.6                    | 1.6E-08                                         |                                                                                                                                                                                        |
| 3141589                                | IL7                     | interleukin 7                                                                          |                           | 8q12-q13        | NM_000880           | 3574             | 1.8                    | 1.8E-06                                         |                                                                                                                                                                                        |
| 2591643                                | COL5A2                  | collagen type V alpha 2                                                                |                           | 2q14-q32        | NM_000393           | 1290             | 1.5                    | 4.0E-10                                         |                                                                                                                                                                                        |
| 3528759                                | ABHD4                   | abhydrolase domain containing 4                                                        |                           | 14q11.2         | NM_022060           | 63874            | 1.4                    | 3.4E-06                                         |                                                                                                                                                                                        |
| 3051753                                | FKBP9                   | FK506 binding protein 9 63 kDa                                                         |                           | 7p11.1          | NM_007270           | 360132           | 1.5                    | 1.3E-06                                         |                                                                                                                                                                                        |
| 3218528                                | ABCA1                   | ATP-binding cassette sub-family A (ABC1) member 1                                      | qRT-PCR                   | 9q31.1          | NM_005502           | 19               | 1.7                    | 2.0E-12                                         | Alzheimer's disease (Wang, F. et al. 2007)                                                                                                                                             |
| 3813604                                | ZADH2                   | zinc binding alcohol dehydrogenase domain containing 2                                 |                           | 18q22.3         | NM_175907           | 284273           | 1.4                    | 5.2E-05                                         |                                                                                                                                                                                        |
| 3498837                                | PCCA                    | propionyl Coenzyme A carboxylase alpha polypeptide                                     |                           | 13q32           | NM_000282           | 5095             | 1.5                    | 2.1E-03                                         |                                                                                                                                                                                        |
| 3884324                                | CTNBL1                  | catenin beta like 1                                                                    |                           | 20q11.23-q12    | NM_030877           | 56259            | 1.5                    | 2.7E-09                                         |                                                                                                                                                                                        |
| 2442008                                | RXRG                    | retinoid X receptor gamma                                                              |                           | 1q22-q23        | NM_006917           | 6258             | 2.5                    | 3.2E-07                                         |                                                                                                                                                                                        |
| 2671728                                | CDCP1                   | CUB domain containing protein 1                                                        |                           | 3p21.31         | NM_022842           | 64866            | 1.3                    | 5.1E-05                                         |                                                                                                                                                                                        |
| 2597867                                | IKZF2                   | IKAROS family zinc finger 2 (Helios)                                                   |                           | 2qter           | NM_001079526        | 22807            | 1.2                    | 1.1E-03                                         |                                                                                                                                                                                        |
| 2967276                                | POPODC3                 | popeye domain containing 3                                                             | qRT-PCR                   | 6q21            | NM_022361           | 64208            | 2.2                    | 2.7E-14                                         |                                                                                                                                                                                        |
| 2330723                                | DNALI1                  | dynein axonemal light intermediate chain 1                                             |                           | 1p35.1          | NM_003462           | 7802             | 1.2                    | 6.8E-03                                         |                                                                                                                                                                                        |
| 2955691                                | DSCR1L1                 | Down syndrome critical region gene 1-like 1                                            |                           | 6p12.3          | NM_005822           | 10231            | 3.4                    | 1.4E-09                                         |                                                                                                                                                                                        |
| 2975867                                | MAP3K5                  | mitogen-activated protein kinase kinase kinase 5                                       | qRT-PCR failed to confirm | 6q22.33         | NM_005923           | 4217             | 1.6                    | 2.2E-07                                         |                                                                                                                                                                                        |
| 3467949                                | SLC5A8                  | solute carrier family 5 (iodide transporter) member 8                                  | qRT-PCR                   | 12q23.2         | NM_145913           | 160728           | 1.6                    | 4.0E-11                                         |                                                                                                                                                                                        |
| 2899413                                | BTN2A3                  | butyrophilin subfamily 2 member A3                                                     |                           | 6p21.3          | NM_024018           | 10384            | 1.6                    | 1.6E-04                                         |                                                                                                                                                                                        |
| 2382467                                | AKR1B1                  | aldo-keto reductase family 1 member B1 (aldose reductase)                              |                           | 1q42.12         | NM_001628           | 440723           | 3.2                    | 7.3E-14                                         |                                                                                                                                                                                        |
| 2469825                                | GREB1                   | GREB1 protein                                                                          |                           | 2p25.1          | NM_014668           | 9687             | 1.5                    | 1.1E-11                                         |                                                                                                                                                                                        |
| 3884405                                | C20orf102               | chromosome 20 open reading frame 102                                                   | qRT-PCR                   | 20q11.23        | NM_080607           | 128434           | 4.8                    | 1.3E-19                                         |                                                                                                                                                                                        |
| 2371474                                | C1orf19                 | chromosome 1 open reading frame 19                                                     |                           | 1q25            | NM_052965           | 116461           | 1.3                    | 5.6E-03                                         |                                                                                                                                                                                        |
| 3007024                                | WBSCR17                 | Williams-Beuren syndrome chromosome region 17                                          |                           | 7q11.23         | NM_022479           | 64409            | 2.3                    | 8.8E-10                                         |                                                                                                                                                                                        |
| 3992747                                | ZIC3                    | Zic family member 3 heterotaxy 1 (odd-paired homolog Drosophila)                       |                           | Xq26.2          | NM_003413           | 7547             | 1.5                    | 2.7E-06                                         |                                                                                                                                                                                        |
| 2873897                                | MARCH3                  | membrane-associated ring finger (C3HC4) 3                                              | qRT-PCR                   | 5q23.2          | NM_178450           | 115123           | 2.1                    | 2.9E-08                                         |                                                                                                                                                                                        |
| 2697863                                | RBP1                    | retinol binding protein 1 cellular                                                     |                           | 3q23            | NM_002899           | 5947             | 1.9                    | 6.2E-04                                         |                                                                                                                                                                                        |
| 3466556                                | NTN4                    | netrin 4                                                                               | qRT-PCR                   | 12q22-q23       | NM_021229           | 59277            | 2.2                    | 7.4E-06                                         |                                                                                                                                                                                        |
| 3727510                                | STXBP4                  | syntaxin binding protein 4                                                             |                           | 17q22           | NM_178509           | 252983           | 1.4                    | 9.8E-03                                         |                                                                                                                                                                                        |
| <b>Cluster 2: PFC (TAS)</b>            |                         |                                                                                        |                           |                 |                     |                  |                        |                                                 |                                                                                                                                                                                        |
| 3748432                                | FAM106A                 | family with sequence similarity 106 member A                                           |                           | 17p11.2         | XR_017880           | 440411           | 2.2                    | 1.2E-05                                         |                                                                                                                                                                                        |
| 2348569                                | PALMD                   | palmdelphin                                                                            | qRT-PCR                   | 1p22-p21        | NM_017734           | 54873            | 1.8                    | 6.1E-05                                         |                                                                                                                                                                                        |
| 2617188                                | ITGA9                   | integrin alpha 9                                                                       | qRT-PCR                   | 3p21.3          | NM_002207           | 3680             | 1.9                    | 1.7E-14                                         |                                                                                                                                                                                        |
| 2643217                                | TF                      | transferrin                                                                            |                           | 3q22.1          | NM_001063           | 7018             | 1.4                    | 9.7E-06                                         | Alzheimer's Disease (Zambenedetti, P. et al. 2003)                                                                                                                                     |
| 3102372                                | SULF1                   | sulfatase 1                                                                            | qRT-PCR                   | 8q13.2-q13.3    | NM_015170           | 23213            | 3.9                    | 6.7E-14                                         |                                                                                                                                                                                        |
| 3748400                                | LOC162632               | TL132 pseudogene                                                                       |                           | 17p11.2         | NR_003190           | 220594           | 2.0                    | 4.3E-07                                         |                                                                                                                                                                                        |
| 3712197                                | USP6                    | ubiquitin specific peptidase 6 (Tre-2 oncogene)                                        |                           | 17p11.2         | NM_004505           | 220594           | 2.0                    | 9.7E-08                                         |                                                                                                                                                                                        |
| 3707498                                | USP6                    | ubiquitin specific peptidase 6 (Tre-2 oncogene)                                        |                           | 17p11.2         | BC029495            | 220594           | 2.2                    | 5.8E-05                                         |                                                                                                                                                                                        |
| 3973891                                | SYTL5                   | synaptotagmin-like 5                                                                   |                           | Xp21.1          | NM_138780           | 94122            | 1.3                    | 4.9E-03                                         |                                                                                                                                                                                        |
| 3814033                                | MBP                     | myelin basic protein                                                                   |                           | 18q23           | NM_002385           | 4155             | 1.6                    | 5.6E-03                                         |                                                                                                                                                                                        |
| 3146455                                | RG52                    | regulator of G-protein signalling 22                                                   |                           | 8q22.2          | NM_015668           | 26166            | 1.5                    | 2.7E-07                                         |                                                                                                                                                                                        |
| 3246888                                | PRKG1                   | protein kinase cGMP-dependent type I                                                   | qRT-PCR failed to confirm | 10q11.2         | NM_006258           | 5592             | 1.7                    | 3.3E-06                                         |                                                                                                                                                                                        |
| 3652867                                | SCNN1G                  | sodium channel nonvoltage-gated 1 gamma                                                |                           | 16p12           | NM_001039           | 6340             | 1.5                    | 1.8E-05                                         |                                                                                                                                                                                        |
| 3558418                                | STXBP6                  | syntaxin binding protein 6 (amisyn)                                                    | qRT-PCR                   | 14q12           | NM_014178           | 29091            | 2.0                    | 2.3E-08                                         |                                                                                                                                                                                        |
| 2749484                                | RXFP1                   | retaxin/insulin-like family peptide receptor 1                                         | qRT-PCR                   | 4q32.1          | NM_021634           | 59350            | 2.0                    | 4.5E-06                                         |                                                                                                                                                                                        |
| 3428190                                | SLC17A8                 | solute carrier family 17 (sodium-dependent inorganic phosphate cotransporter) member 8 | qRT-PCR                   | 12q23.1         | NM_139319           | 246213           | 2.1                    | 5.2E-05                                         |                                                                                                                                                                                        |
| 3699581                                | CFDP1                   | craniofacial development protein 1                                                     |                           | 16q23.1         | NM_006324           | 124491           | 1.4                    | 3.7E-04                                         |                                                                                                                                                                                        |
| 3319137                                | PTPRF                   | PTPRF interacting protein binding protein 2 (liprin beta 2)                            | qRT-PCR failed to confirm | 11p15.4         | NM_003621           | 8495             | 1.5                    | 2.7E-09                                         |                                                                                                                                                                                        |
| 2689516                                | ZBTB20                  | zinc finger and BTB domain containing 20                                               |                           | 3q13.2          | NM_015642           | 26137            | 1.5                    | 1.2E-03                                         |                                                                                                                                                                                        |
| 3795942                                | YES1                    | v-yes-1 Yamaguchi sarcoma viral oncogene homolog 1                                     |                           | 18p11.31-p11.21 | NM_005433           | 7525             | 2.0                    | 9.7E-07                                         |                                                                                                                                                                                        |
| 3762519                                | SPAG9                   | sperm associated antigen 9                                                             |                           | 17q21.33        | NM_003971           | 9043             | 1.4                    | 2.1E-03                                         |                                                                                                                                                                                        |
| 3040897                                | CDC47L                  | cell division cycle associated 7-like                                                  |                           | 7p15.3          | NM_018719           | 55536            | 1.5                    | 5.8E-03                                         |                                                                                                                                                                                        |
| 2944491                                | MBOAT1                  | membrane bound O-acyltransferase domain containing 1                                   |                           | 6p22.3          | NM_001080480        | 154141           | 1.3                    | 6.0E-06                                         |                                                                                                                                                                                        |
| 3385951                                | NOX4                    | NADPH oxidase 4                                                                        |                           | 11p11.12        | NM_016931           | 283247           | 2.0                    | 1.7E-06                                         |                                                                                                                                                                                        |
| 2426734                                | C1orf62                 | chromosome 1 open reading frame 62                                                     | qRT-PCR                   | 1p13.3          | NM_152763           | 254268           | 1.6                    | 3.1E-04                                         |                                                                                                                                                                                        |
| 3618333                                | MEIS2                   | Meis homeobox 2                                                                        |                           | 15q14           | NM_172316           | 4212             | 2.7                    | 5.3E-15                                         |                                                                                                                                                                                        |
| 2820622                                | ANKRD32                 | ankyrin repeat domain 32                                                               | qRT-PCR                   | 5q15            | NM_032290           | 84250            | 2.4                    | 2.2E-03                                         |                                                                                                                                                                                        |
| 2649367                                | PTX3                    | pentraxin-related gene rapidly induced by IL-1 beta                                    |                           | 3q25            | NM_002852           | 5806             | 1.4                    | 1.1E-03                                         |                                                                                                                                                                                        |
| <b>Cluster 3: TAU+TAS+OCC</b>          |                         |                                                                                        |                           |                 |                     |                  |                        |                                                 |                                                                                                                                                                                        |
| 2993124                                | NPY                     | neuropeptide Y                                                                         | qRT-PCR, ISH              | 7p15.1          | NM_000905           | 4852             | 3.6                    | 9.8E-13                                         |                                                                                                                                                                                        |
| 3928668                                | TIAM1                   | T-cell lymphoma invasion and metastasis 1                                              |                           | 21q22.11        | NM_003253           | 7074             | 1.6                    | 3.1E-05                                         |                                                                                                                                                                                        |
| 3192353                                | NTNG2                   | netrin G2                                                                              |                           | 9q34            | NM_032536           | 84628            | 4.7                    | 1.0E-12                                         |                                                                                                                                                                                        |
| 2479433                                | PLEKHH2                 | pleckstrin homology domain containing, family H (with MyTH4 domain) member 2           |                           | 2p21            | NM_172069           | 130271           | 1.6                    | 3.2E-09                                         |                                                                                                                                                                                        |
| 3188656                                | LHX2                    | LIM homeobox 2                                                                         |                           | 9q33-q34.1      | NM_004789           | 9355             | 1.9                    | 3.5E-08                                         |                                                                                                                                                                                        |
| 2586603                                | TLK1                    | tousted-like kinase 1                                                                  |                           | 2q31.1          | NM_012290           | 9874             | 1.8                    | 2.6E-06                                         |                                                                                                                                                                                        |
| 3198346                                | PTPRD                   | protein tyrosine phosphatase, receptor type, D                                         |                           | 9p23-p24.3      | NM_001040712        | 5789             | 1.3                    | 5.6E-03                                         |                                                                                                                                                                                        |
| 2820394                                | NR2F1                   | nuclear receptor subfamily 2, group F, member 1                                        |                           | 5q14            | NM_005654           | 7025             | 3.8                    | 4.1E-13                                         |                                                                                                                                                                                        |
| 2405284                                | TMEM54                  | transmembrane protein 54                                                               |                           | 1p35-p34        | NM_033504           | 113452           | 1.6                    | 9.6E-06                                         |                                                                                                                                                                                        |
| 3723627                                | CRHR1                   | corticotropin releasing hormone receptor 1                                             |                           | 17q12-q22       | NM_004382           | 1394             | 1.4                    | 4.3E-06                                         | depression (Licinio et al., 2004; Liu et al., 2006); alcohol abuse (Treutlein et al., 2006)                                                                                            |
| 3868963                                | NRK7                    | natural killer cell group 7 sequence                                                   |                           | 19q13.33        | NM_005601           | 4818             | 1.8                    | 4.8E-09                                         |                                                                                                                                                                                        |
| 3456006                                | CSAD                    | cysteine sulfonic acid decarboxylase                                                   |                           | 12q13.11-q14.3  | NM_015989           | 51380            | 2.1                    | 5.3E-09                                         |                                                                                                                                                                                        |
| 2766122                                | FLJ13197                | hypothetical FLJ13197                                                                  |                           | 4p14            | NM_024614           | 79667            | 1.7                    | 8.3E-05                                         |                                                                                                                                                                                        |
| 3188697                                | NEK6                    | NIMA (never in mitosis gene a)-related kinase 6                                        |                           | 9q33.3-q34.11   | NM_014397           | 10783            | 1.9                    | 2.9E-08                                         |                                                                                                                                                                                        |
| 3540552                                | FUT8                    | fucosyltransferase 8 (alpha (1,6) fucosyltransferase)                                  |                           | 14q24.3         | NM_004480           | 2530             | 1.5                    | 3.0E-04                                         |                                                                                                                                                                                        |



| 3637367                   | KLHL25   | kelch-like 25                                                             |                   | 15q25.3       | NM_022480    | 64410  | 1.2 | 7.0E-03 |                                               |
|---------------------------|----------|---------------------------------------------------------------------------|-------------------|---------------|--------------|--------|-----|---------|-----------------------------------------------|
| <b>Cluster 4: TAU+TAS</b> |          |                                                                           |                   |               |              |        |     |         |                                               |
| 3815336                   | NCAM2    | neural cell adhesion molecule 2                                           |                   | 21q21.1       | NM_004540    | 4685   | 2.5 | 2.5E-07 |                                               |
| 3301814                   | PIK3AP1  | phosphoinositide-3-kinase adaptor protein 1                               |                   | 10q24.1       | NM_152309    | 118788 | 1.4 | 2.5E-06 |                                               |
| 3397003                   | KIRREL3  | kin of IRRE like 3 (Drosophila)                                           |                   | 11q24         | NM_032531    | 84623  | 1.8 | 2.1E-05 |                                               |
| 3995392                   | ZNF185   | zinc finger protein 185 (LIM domain)                                      |                   | Xq28          | BX537525     | 7739   | 1.5 | 4.5E-09 |                                               |
| 3512948                   | C13orf18 | chromosome 13 open reading frame 18                                       |                   | 13q14.12      | BC043488     | 80183  | 1.4 | 1.6E-04 |                                               |
| 3597914                   | SNX22    | sorting nexin 22                                                          |                   | 3p21.3        | NM_024798    | 1238   | 1.8 | 2.1E-10 |                                               |
| 3167511                   | GALT     | galactose-1-phosphate uridylyltransferase                                 |                   | 9p13          | NM_000155    | 2592   | 1.4 | 7.4E-09 |                                               |
| 2569215                   | STGAL2   | ST6 beta-galactosaminidase alpha-2 6-sialyltransferase 2                  |                   | 2q11.2-q12.1  | NM_032528    | 84620  | 1.9 | 6.9E-07 |                                               |
| 2376548                   | MFRSD4   | major facilitator superfamily domain containing 4                         |                   | 14q32.1       | NM_181644    | 148808 | 1.5 | 1.4E-03 |                                               |
| 3530164                   | SPINT1   | serine peptidase inhibitor Kunitz type 1                                  |                   | 15q15.1       | NM_001032367 | 6692   | 1.9 | 3.4E-12 |                                               |
| 3175274                   | PCSK5    | proprotein convertase subtilisin/kexin type 5                             |                   | 9q21.3        | NM_006200    | 5125   | 1.6 | 2.2E-04 |                                               |
| 3510450                   | LHFP     | lipoma HMGIC fusion partner                                               |                   | 13q12         | NM_005780    | 10186  | 2.8 | 2.5E-14 |                                               |
| 3913018                   | LAMA5    | laminin alpha 5                                                           |                   | 20q13.2-q13.3 | NM_005560    | 3911   | 1.3 | 3.4E-05 |                                               |
| 3815399                   | CNN2     | calponin 2                                                                |                   | 19p13.3       | NM_004368    | 1265   | 1.9 | 6.0E-06 |                                               |
| 3020343                   | MET      | met proto-oncogene (hepatocyte growth factor receptor)                    |                   | 7q31          | NM_000245    | 4233   | 4.6 | 5.2E-11 | autism (Campbell, D. B. et al. 2006)          |
| 2696309                   | AMOTL2   | angiotensin like 2                                                        |                   | 3q21-q22      | NM_016201    | 51421  | 1.4 | 5.6E-03 |                                               |
| 3752709                   | MYO1D    | myosin ID                                                                 |                   | 17q11-q12     | NM_015194    | 4642   | 1.6 | 4.5E-03 |                                               |
| 2694817                   | PLXND1   | plexin D1                                                                 |                   | 3q21.3        | NM_015103    | 23129  | 2.1 | 2.6E-13 |                                               |
| 4026224                   | PNCK     | pregnancy upregulated non-ubiquitously expressed CaM kinase               |                   | Xq28          | NM_001039582 | 139728 | 1.7 | 5.4E-08 |                                               |
| 2608725                   | BHLHB2   | basic helix-loop-helix domain containing class B 2                        |                   | 3p28          | NM_003670    | 8553   | 3.6 | 1.5E-17 |                                               |
| 3721010                   | IGFBP4   | insulin-like growth factor binding protein 4                              |                   | 17q12-q21.1   | NM_001552    | 3487   | 1.9 | 7.4E-07 |                                               |
| 2349863                   | NTNG1    | netrin G1                                                                 |                   | 1p13.3        | NM_014917    | 22854  | 2.5 | 1.4E-07 | schizophrenia (Fukasawa, M. et al. 2004)      |
| 2851511                   | CDH9     | cadherin 9 type 2 (T1-cadherin)                                           |                   | 5p14          | NM_016279    | 1007   | 2.2 | 4.1E-05 |                                               |
| 3743701                   | PLSCR3   | phospholipid scramblase 3                                                 |                   | 17p13.1       | NM_020360    | 57048  | 1.3 | 9.3E-03 |                                               |
| 3608466                   | MAN2A2   | mannosidase alpha class 2A member 2                                       |                   | 15q26.1       | NM_006122    | 4122   | 1.2 | 9.5E-03 |                                               |
| <b>Cluster 5: PFC+TAS</b> |          |                                                                           |                   |               |              |        |     |         |                                               |
| 2598828                   | IGFBP5   | insulin-like growth factor binding protein 5                              | qRT-PCR           | 2q33-q36      | NM_000599    | 3488   | 4.5 | 2.0E-13 |                                               |
| 3153716                   | ADCY8    | adenylate cyclase 8 (brain)                                               | qRT-PCR           | 8q24          | NM_001115    | 114    | 2.2 | 6.2E-10 |                                               |
| 2450865                   | CSRP1    | cysteine and glycine-rich protein 1                                       |                   | 1q32          | NM_004078    | 1465   | 1.5 | 4.7E-05 |                                               |
| 3029900                   | CNTNAP2  | contactin associated protein-like 2                                       | qRT-PCR, ISH, IHC | 7q35-q36      | NM_014141    | 26047  | 3.0 | 3.0E-08 | 612100: AUTISM, SUSCEPTIBILITY TO, 15; AUTS15 |
| 2624639                   | CACNA2D3 | calcium channel voltage-dependent alpha 2/delta 3 subunit                 |                   | 3p21.1        | NM_018398    | 55799  | 1.6 | 1.4E-05 |                                               |
| 3898355                   | FLRT3    | fibronectin leucine rich transmembrane protein 3                          |                   | 20p11         | NM_198391    | 23767  | 2.3 | 5.8E-03 |                                               |
| 2898934                   | SCGN     | secretagogin EF-hand calcium binding protein                              |                   | 6p22.3-p22.1  | NM_006998    | 10590  | 1.5 | 2.6E-04 |                                               |
| 3278305                   | C10orf30 | chromosome 10 open reading frame 30                                       |                   | 10p13         | BC031618     | 222389 | 1.4 | 1.9E-03 |                                               |
| 2683763                   | ROBO1    | roundabout axon guidance receptor homolog 1 (Drosophila)                  | qRT-PCR           | 3p12          | NM_002941    | 6091   | 2.4 | 1.4E-12 | 606896: DYSLEXIA, SUSCEPTIBILITY TO, 5; DYX5  |
| 2418078                   | NEGR1    | neuronal growth regulator 1                                               |                   | 1p31.1        | NM_173808    | 257194 | 1.8 | 7.4E-03 |                                               |
| 3125915                   | MTUS1    | mitochondrial tumor suppressor 1                                          |                   | 8p22          | NM_001001931 | 57509  | 1.6 | 2.5E-07 |                                               |
| 3669171                   | CNTNAP4  | contactin associated protein-like 4                                       |                   | 16q23.1       | NM_033401    | 85445  | 1.8 | 3.2E-07 |                                               |
| 3144033                   | CALB1    | calbindin 1 28kDa                                                         | qRT-PCR, IHC      | 8q21.3-q22.1  | NM_004929    | 793    | 2.8 | 1.2E-05 |                                               |
| 2703836                   | SLITRK3  | SLIT and NTRK-like family member 3                                        |                   | 3q26.1        | NM_014926    | 22865  | 1.9 | 1.3E-03 |                                               |
| 3344142                   | NAALAD2  | N-acetylated alpha-linked acidic dipeptidase 2                            |                   | 11q14.3-q21   | NM_005467    | 10003  | 1.5 | 3.5E-03 |                                               |
| <b>Cluster 6: OCC</b>     |          |                                                                           |                   |               |              |        |     |         |                                               |
| 2736462                   | BMPR1B   | bone morphogenetic protein receptor type 1B                               |                   | 4q22-q24      | NM_001203    | 658    | 2.6 | 1.1E-11 |                                               |
| 3572517                   | TGFB3    | transforming growth factor beta 3                                         |                   | 14q24         | NM_003239    | 7043   | 2.3 | 1.1E-06 |                                               |
| 3219030                   | FLJ13385 | hypothetical protein FLJ13385                                             |                   | 9q32          | NM_024853    | 79911  | 1.9 | 8.6E-06 |                                               |
| 3106559                   | CP       | ceruloplasmin (ferroxidase)                                               |                   | 8q23          | NM_000096    | 115111 | 2.3 | 9.3E-08 |                                               |
| 3999395                   | MID1     | midline 1 (Opitz/BBB syndrome)                                            | qRT-PCR, ISH      | Xp22          | NM_033291    | 4281   | 2.2 | 4.0E-06 |                                               |
| 2899241                   | NY-REN-7 | NY-REN-7 antigen                                                          |                   | 5q35.2        | AB018295     | 389347 | 1.5 | 6.6E-06 |                                               |
| 3144346                   | RUNX1T1  | runt-related transcription factor 1; translocated to 1 (cyclin D-related) |                   | 8q22          | NM_175635    | 862    | 1.9 | 4.1E-05 |                                               |
| 2600689                   | EPHA4    | EPH receptor A4                                                           |                   | 2q36.1        | NM_004438    | 2043   | 2.6 | 4.5E-08 |                                               |
| 3671727                   | ATP2C2   | ATPase Ca++ transporting type 2C member 2                                 |                   | 16q24.1       | NM_014861    | 9914   | 1.3 | 9.9E-04 |                                               |
| 3564620                   | NID2     | nidogen 2 (osteonidogen)                                                  |                   | 14q21-q22     | NM_007361    | 22795  | 1.6 | 6.9E-10 |                                               |
| 3862188                   | FCGBP    | Fc fragment of IgG binding protein                                        |                   | 19q13.1       | NM_003890    | 8857   | 1.6 | 1.7E-03 |                                               |

**Table S8. Gene lists for PFC clusters illustrated in Figure 3b**

| Exon Array Transcript Cluster ID   | Official Gene Symbol | Gene Name                                                                                   | Confirmation              | Cytoband      | RefSeq Accession | Entrez GeneID | Maximum Fold Change | corrected p-value (False Discovery Rate) | OMIM and Genetic Association Database annotations                                                                                                                |                                               |
|------------------------------------|----------------------|---------------------------------------------------------------------------------------------|---------------------------|---------------|------------------|---------------|---------------------|------------------------------------------|------------------------------------------------------------------------------------------------------------------------------------------------------------------|-----------------------------------------------|
| <b>Cluster 1: PFC &gt; MS</b>      |                      |                                                                                             |                           |               |                  |               |                     |                                          |                                                                                                                                                                  |                                               |
| 3618333                            | MEIS2                | Meis homeobox 2                                                                             |                           | 15q14         | NM_172316        | 4212          | 3.6                 | 5.0E-05                                  | Numbered annotations refer to OMIM; references are retrieved from the NCBI GAD at <a href="http://geneticassociationdb.nih.gov">geneticassociationdb.nih.gov</a> |                                               |
| 3882012                            | DNMT3B               | DNA (cytosine-5-)methyltransferase 3 beta                                                   |                           | 20q11.2       | NM_175848        | 1789          | 1.3                 | 5.1E-05                                  |                                                                                                                                                                  |                                               |
| 2598828                            | IGFBP5               | insulin-like growth factor binding protein 5                                                | qRT-PCR                   | 2q33-q36      | NM_000599        | 3488          | 2.7                 | 4.0E-05                                  |                                                                                                                                                                  |                                               |
| 3884324                            | CTNBL1               | catenin beta like 1                                                                         |                           | 20q11.23-q12  | NM_030877        | 56259         | 1.8                 | 1.9E-04                                  |                                                                                                                                                                  |                                               |
| 3218528                            | ABCA1                | ATP-binding cassette sub-family A (ABC1) member 1                                           | qRT-PCR                   | 9q31.1        | NM_005502        | 19            | 1.6                 | 4.6E-05                                  |                                                                                                                                                                  | Alzheimer's disease (Wang, F. et al. 2007)    |
| 3102372                            | SULF1                | sulfatase 1                                                                                 | qRT-PCR                   | 8q13.2-q13.3  | NM_015170        | 23213         | 2.7                 | 4.0E-05                                  |                                                                                                                                                                  |                                               |
| 3797295                            | L3MBTL4              | l(3)mbt-like 4 (Drosophila)                                                                 |                           | 18p11.31      | NM_173464        | 91133         | 2.1                 | 7.7E-07                                  |                                                                                                                                                                  |                                               |
| 2617188                            | ITGA9                | integrin alpha 9                                                                            | qRT-PCR                   | 3p21.3        | NM_002207        | 3680          | 1.7                 | 4.7E-04                                  |                                                                                                                                                                  |                                               |
| 2967276                            | POPD3                | popeye domain containing 3                                                                  | qRT-PCR                   | 6q21          | NM_022361        | 64208         | 2.3                 | 1.3E-04                                  |                                                                                                                                                                  |                                               |
| 3319137                            | PPFIBP2              | PTPRF interacting protein binding protein 2 (liprin beta 2)                                 | qRT-PCR failed to confirm | 11p15.4       | NM_003621        | 8495          | 1.8                 | 1.9E-04                                  |                                                                                                                                                                  |                                               |
| <b>Cluster 2: OPFC</b>             |                      |                                                                                             |                           |               |                  |               |                     |                                          |                                                                                                                                                                  |                                               |
| 3023483                            | FAM40B               | family with sequence similarity 40 member B                                                 |                           | 7q32.1        | BC019064         | 57464         | 3.3                 | 1.2E-14                                  |                                                                                                                                                                  |                                               |
| 2883878                            | EBF1                 | early B-cell factor 1                                                                       |                           | 5q34          | NM_024007        | 1879          | 2.2                 | 4.9E-05                                  |                                                                                                                                                                  |                                               |
| 2442008                            | RXRG                 | retinoid X receptor gamma                                                                   |                           | 1q22-q23      | NM_006917        | 6258          | 4.2                 | 1.1E-05                                  |                                                                                                                                                                  |                                               |
| 3798778                            | FAM38B               | family with sequence similarity 38 member B                                                 |                           | 18p11.22      | NM_022068        | 63895         | 2.1                 | 7.7E-07                                  |                                                                                                                                                                  |                                               |
| 2614369                            | RARB                 | retinoic acid receptor beta                                                                 |                           | 3p24          | NM_000965        | 5915          | 2.9                 | 2.4E-03                                  |                                                                                                                                                                  |                                               |
| <b>Cluster 3: OPFC+DLPFC+VLPFC</b> |                      |                                                                                             |                           |               |                  |               |                     |                                          |                                                                                                                                                                  |                                               |
| 2343418                            | PTGFR                | prostaglandin F receptor (FP)                                                               |                           | 1p31.1        | NM_001039585     | 5737          | 1.5                 | 5.7E-04                                  | 612100: AUTISM, SUSCEPTIBILITY TO, 15; AUTS15                                                                                                                    |                                               |
| 3812864                            | CBLN2                | cerebellin 2 precursor                                                                      | qRT-PCR                   | 18q22.2       | NM_182511        | 147381        | 4.1                 | 5.8E-03                                  |                                                                                                                                                                  |                                               |
| 3153716                            | ADCY8                | adenylate cyclase 8 (brain)                                                                 | qRT-PCR                   | 8q24          | NM_001115        | 114           | 2.0                 | 8.1E-05                                  |                                                                                                                                                                  |                                               |
| 3197014                            | GLIS3                | GLIS family zinc finger 3                                                                   |                           | 9p24.2        | NM_152629        | 169792        | 2.7                 | 4.0E-05                                  |                                                                                                                                                                  |                                               |
| 2426734                            | C1orf62              | chromosome 1 open reading frame 62                                                          | qRT-PCR                   | 1p13.3        | NM_152763        | 254268        | 2.2                 | 4.9E-05                                  |                                                                                                                                                                  |                                               |
| 3558418                            | STXBP6               | syntaxin binding protein 6 (amisyn)                                                         | qRT-PCR                   | 14q12         | NM_014178        | 29091         | 2.8                 | 4.7E-05                                  |                                                                                                                                                                  |                                               |
| 3898355                            | FLRT3                | fibronectin leucine rich transmembrane protein 3                                            |                           | 20p11         | NM_198391        | 23767         | 4.3                 | 8.1E-03                                  |                                                                                                                                                                  |                                               |
| 2690715                            | IGSF11               | immunoglobulin superfamily member 11                                                        |                           | 3q13.32       | NM_152538        | 152404        | 1.8                 | 1.9E-04                                  |                                                                                                                                                                  |                                               |
| 2447192                            | RGS8                 | regulator of G-protein signalling 8                                                         | qRT-PCR failed to confirm | 1q25          | NM_033345        | 85397         | 2.5                 | 2.0E-05                                  |                                                                                                                                                                  |                                               |
| 3029900                            | CNTNAP2              | contactin associated protein-like 2                                                         | qRT-PCR, ISH, IHC         | 7q35-q36      | NM_014141        | 26047         | 5.1                 | 6.4E-04                                  |                                                                                                                                                                  |                                               |
| 3999568                            | ARHGAP6              | Rho GTPase activating protein 6                                                             |                           | Xp22.3        | NM_013422        | 395           | 2.2                 | 4.9E-05                                  |                                                                                                                                                                  |                                               |
| <b>Cluster 4: MPFC</b>             |                      |                                                                                             |                           |               |                  |               |                     |                                          |                                                                                                                                                                  |                                               |
| 2992814                            | GPNMB                | glycoprotein (transmembrane) nmb                                                            |                           | 7p15          | NM_001005340     | 10457         | 1.4                 | 6.9E-04                                  |                                                                                                                                                                  | 612100: AUTISM, SUSCEPTIBILITY TO, 15; AUTS15 |
| 2944491                            | MBOAT1               | membrane bound O-acyltransferase domain containing 1                                        |                           | 6p22.3        | NM_001080480     | 154141        | 1.6                 | 4.6E-05                                  |                                                                                                                                                                  |                                               |
| 3278305                            | C10orf30             | chromosome 10 open reading frame 30                                                         |                           | 10p13         | BC031618         | 222389        | 1.5                 | 5.7E-04                                  |                                                                                                                                                                  |                                               |
| 3571059                            | DPF3                 | D4 zinc and double PHD fingers family 3                                                     |                           | 14q24.3-q31.1 | NM_012074        | 8110          | 1.7                 | 4.7E-04                                  |                                                                                                                                                                  |                                               |
| 3995254                            | GABRQ                | gamma-aminobutyric acid (GABA) receptor theta                                               |                           | Xq28          | NM_018558        | 55879         | 1.6                 | 4.6E-05                                  |                                                                                                                                                                  |                                               |
| 3067302                            | LAMB1                | laminin beta 1                                                                              |                           | 7q22          | NM_002291        | 3912          | 1.5                 | 5.7E-04                                  |                                                                                                                                                                  |                                               |
| 3511031                            | ELF1                 | E74-like factor 1 (ets domain transcription factor)                                         |                           | 13q13         | NM_172373        | 1997          | 1.5                 | 5.7E-04                                  |                                                                                                                                                                  |                                               |
| 3642200                            | PCSK6                | proprotein convertase subtilisin/kexin type 6                                               |                           | 15q26.3       | NM_138319        | 5046          | 1.6                 | 4.6E-05                                  |                                                                                                                                                                  |                                               |
| 3132940                            | ANK1                 | ankyrin 1 erythrocytic                                                                      |                           | 8p11.1        | NM_000037        | 286           | 1.5                 | 5.7E-04                                  |                                                                                                                                                                  |                                               |
| 3326635                            | CD44                 | CD44 molecule (Indian blood group)                                                          |                           | 11p13         | NM_001001389     | 960           | 1.8                 | 1.9E-04                                  |                                                                                                                                                                  |                                               |
| 3430228                            | RFX4                 | regulatory factor X 4 (influences HLA class II expression)                                  |                           | 12q24         | NM_213594        | 5982          | 1.6                 | 4.6E-05                                  |                                                                                                                                                                  |                                               |
| 3491486                            | PCDH17               | protocadherin 17                                                                            |                           | 13q21.1       | NM_001040429     | 27253         | 2.9                 | 2.4E-03                                  |                                                                                                                                                                  |                                               |
| 2899413                            | BTN2A3               | butyrophilin subfamily 2 member A3                                                          |                           | 6p21.3        | NM_024018        | 10384         | 1.3                 | 5.1E-05                                  |                                                                                                                                                                  |                                               |
| <b>Cluster 5: MPFC+MS</b>          |                      |                                                                                             |                           |               |                  |               |                     |                                          |                                                                                                                                                                  |                                               |
| 2709631                            | MASP1                | mannan-binding lectin serine peptidase 1 (C4/C2 activating component of Ra-reactive factor) | qRT-PCR                   | 3q27-q28      | NM_001879        | 5648          | 6.3                 | 6.5E-06                                  | 612100: AUTISM, SUSCEPTIBILITY TO, 15; AUTS15                                                                                                                    |                                               |
| 3169331                            | ALDH1B1              | aldehyde dehydrogenase 1 family member B1                                                   |                           | 9p11.1        | NM_000692        | 219           | 2.0                 | 8.1E-05                                  |                                                                                                                                                                  |                                               |
| 3958658                            | LARGE                | like-glycosyltransferase                                                                    |                           | 22q12.3       | NM_004737        | 9215          | 1.6                 | 4.6E-05                                  |                                                                                                                                                                  |                                               |
| 3400586                            | WNT5B                | wingless-type MMTV integration site family member 5B                                        |                           | 12p13.3       | NM_030775        | 81029         | 1.5                 | 5.7E-04                                  |                                                                                                                                                                  |                                               |
| 3750767                            | SPAG5                | sperm associated antigen 5                                                                  |                           | 17cen-q12     | NM_006461        | 230           | 2.1                 | 7.7E-07                                  |                                                                                                                                                                  |                                               |
| 3733911                            | SSTR2                | somatostatin receptor 2                                                                     |                           | 17q24         | NM_001050        | 6752          | 2.3                 | 1.3E-04                                  |                                                                                                                                                                  |                                               |
| 3352618                            | GRIK4                | glutamate receptor ionotropic kainate 4                                                     |                           | 11q22.3       | NM_014619        | 2900          | 1.7                 | 4.7E-04                                  |                                                                                                                                                                  |                                               |
| 3197955                            | GLDC                 | glycine dehydrogenase (decarboxylating)                                                     |                           | 9p22          | NM_000170        | 2731          | 1.6                 | 4.6E-05                                  |                                                                                                                                                                  |                                               |
| 2783207                            | PRSS12               | protease serine 12 (neurotrypsin motopsin)                                                  |                           | 4q28.1        | NM_003619        | 8492          | 2.6                 | 1.0E-03                                  |                                                                                                                                                                  |                                               |
| 3181976                            | NR4A3                | nuclear receptor subfamily 4 group A member 3                                               |                           | 9q22          | NM_173200        | 8013          | 1.7                 | 4.7E-04                                  |                                                                                                                                                                  |                                               |
| 2559189                            | CYP26B1              | cytochrome P450 family 26 subfamily B polypeptide 1                                         | qRT-PCR                   | 2p13.3        | NM_019885        | 56603         | 2.0                 | 8.1E-05                                  |                                                                                                                                                                  |                                               |
| 3333595                            | GN3G                 | guanine nucleotide binding protein (G protein) gamma 3                                      |                           | 11p11         | NM_012202        | 2785          | 1.5                 | 5.7E-04                                  |                                                                                                                                                                  |                                               |
| 2709132                            | ETV5                 | ets variant gene 5 (ets-related molecule)                                                   |                           | 3q28          | NM_004454        | 2119          | 2.3                 | 1.3E-04                                  |                                                                                                                                                                  |                                               |
| <b>Cluster 6: VLPFC+MS</b>         |                      |                                                                                             |                           |               |                  |               |                     |                                          |                                                                                                                                                                  |                                               |
| 3135340                            | OPRK1                | opioid receptor kappa 1                                                                     |                           | 8q11.2        | NM_000912        | 4986          | 3.2                 | 1.1E-03                                  |                                                                                                                                                                  | 60208: speech-language disorder 1             |
| 2378662                            | TRAF5                | TNF receptor-associated factor 5                                                            |                           | 1q32          | NM_001033910     | 7188          | 1.5                 | 5.7E-04                                  |                                                                                                                                                                  |                                               |
| 2778440                            | UNC5C                | unc-5 homolog C (C. elegans)                                                                |                           | 4q21-q23      | NM_003728        | 8633          | 2.0                 | 8.1E-05                                  |                                                                                                                                                                  |                                               |
| 2731636                            | DKFZP564O0823        | DKFZP564O0823 protein                                                                       |                           | 4q13.3-q21.3  | NM_015393        | 25849         | 1.8                 | 1.9E-04                                  |                                                                                                                                                                  |                                               |
| 2805232                            | PDZD2                | PDZ domain containing 2                                                                     |                           | 5p13.3        | NM_178140        | 23037         | 2.1                 | 7.7E-07                                  |                                                                                                                                                                  |                                               |
| 2503929                            | CNTNAP5              | contactin associated protein-like 5                                                         |                           | 2q14.3        | NM_130773        | 129684        | 1.7                 | 4.7E-04                                  |                                                                                                                                                                  |                                               |
| 3019793                            | FOXP2                | forkhead box P2                                                                             | qRT-PCR, IHC              | 7q31          | NM_148899        | 93986         | 1.9                 | 6.9E-06                                  |                                                                                                                                                                  |                                               |
| 2603987                            | NGEF                 | neuronal guanine nucleotide exchange factor                                                 |                           | 2q37          | NM_019850        | 25791         | 1.5                 | 5.7E-04                                  |                                                                                                                                                                  |                                               |
| 2908154                            | C6orf206             | chromosome 6 open reading frame 206                                                         |                           | 6p21.1        | NM_152732        | 221421        | 2.2                 | 4.9E-05                                  |                                                                                                                                                                  |                                               |
| 3148545                            | RSPO2                | R-spondin 2 homolog (Xenopus laevis)                                                        |                           | 8q23.1        | NM_178565        | 340419        | 2.1                 | 7.7E-07                                  |                                                                                                                                                                  |                                               |
| 2709778                            | BCL6                 | B-cell CLL/lymphoma 6 (zinc finger protein 51)                                              | qRT-PCR                   | 3q27          | NM_138931        | 604           | 3.5                 | 2.0E-05                                  |                                                                                                                                                                  |                                               |

**Table S9a. Additional regional DEX genes validated**

| Exon Array Transcript Cluster ID | Official Gene Symbol | Entrez GeneID | RefSeq Accession | Exon Array:qRT-PCR Correlation | Exon Array p-value | qRT-PCR ANOVA p-value | Additional Confirmation | Peak Expression |
|----------------------------------|----------------------|---------------|------------------|--------------------------------|--------------------|-----------------------|-------------------------|-----------------|
| 2386943                          | ACTN2                | 88            | NM_0011103       | 0.95                           | 1.5E-19            | 0.054                 |                         | NCTX            |
| 3391149                          | CRYAB                | 1410          | NM_001885        | 0.87                           | 7.3E-22            | 0.0010                |                         | HIP             |
| 2745899                          | HHIP                 | 64399         | NM_022475        | 0.93                           | 2.1E-23            | 0.086                 |                         | HIP             |
| 3545634                          | NRXN3                | 9369          | NM_138970        | 0.68                           | 3.4E-17            | 0.015                 | ISH                     | STR             |
| 3889419                          | TSHZ2 (C20orf17)     | 128553        | NM_173485        | 0.80                           | 9.5E-24            | 0.0020                | ISH                     | STR             |
| 3942838                          | LIMK2                | 3985          | NM_016733        | 0.99                           | 3.1E-25            | 0.085                 |                         | THM             |
| 3129026                          | CHRNA2               | 1135          | NM_000742        | 0.98                           | 1.4E-21            | n.s.                  |                         | THM             |
| 2732844                          | ANXA3                | 306           | NM_005139        | 0.99                           | 1.2E-42            | 0.00017               |                         | THM             |
| 2922972                          | DCBLD1               | 285761        | NM_173674        | 0.61                           | 8.6E-21            | 0.017                 |                         | THM             |
| 3177111                          | NTRK2                | 4915          | NM_001018066     | n.s.                           | 3.3E-03            | 0.067                 |                         | CBL             |
| 2871241                          | MCC                  | 4163          | NM_001085377     | 0.96                           | 7.5E-24            | 0.024                 | ISH                     | CBL             |
| 3790982                          | CDH20                | 28316         | NM_031891        | 0.81                           | 3.7E-17            | 0.016                 | ISH                     | CBL             |

n.s.= not significant (p>0.05)

**Table S9b. Additional intra-NCTX DEX genes validated**

| Exon Array Transcript Cluster ID | Official Gene Symbol | Entrez GeneID | RefSeq Accession | Exon Array:qRT-PCR Correlation | Exon Array p-value | qRT-PCR ANOVA p-value | Additional Confirmation | Peak Expression |
|----------------------------------|----------------------|---------------|------------------|--------------------------------|--------------------|-----------------------|-------------------------|-----------------|
| 3579114                          | BCL11B               | 64919         | NM_138576        | ND                             | 1.4E-02            | ND                    | IHC                     | OPFC            |
| 3762753                          | CA10                 | 56934         | NM_020178        | 0.98                           | 2.0E-06            | 0.0106                |                         | OPFC            |
| 2523540                          | CYP20A1              | 57404         | NM_177538        | 0.96                           | 1.4E-08            | 0.0006                |                         | OPFC            |
| 2515471                          | DLX1                 | 1745          | NM_178120        | ND                             | 3.1E-02            | ND                    | IHC                     | OPFC            |
| 2586989                          | DLX2                 | 1746          | NM_004405        | ND                             | 6.2E-03            | ND                    | IHC                     | OPFC            |
| 2448710                          | FAM5C                | 339479        | NM_199051        | 0.80                           | 4.9E-07            | 0.0007                |                         | OPFC            |
| 2474977                          | FOSL2                | 2355          | NM_005253        | 0.97                           | 1.2E-03            | 0.0492                |                         | OPFC            |
| 2794454                          | GLRA3                | 8001          | NM_006529        | 0.85                           | 7.6E-04            | n.s.                  |                         | OPFC            |
| 3987876                          | HTR2C                | 3358          | NM_000868        | 0.87                           | 2.9E-04            | 2.9E-05               |                         | OPFC            |
| 2782267                          | NEUROG2              | 63973         | NM_024019        | 0.94                           | 3.9E-06            | 2.8E-06               |                         | OPFC            |
| 2738378                          | NPNT                 | 255743        | NM_198278        | 0.93                           | 1.0E-05            | 0.0156                |                         | OPFC            |
| 3236786                          | PTER                 | 9317          | NM_001001484     | 0.81                           | 1.7E-04            | n.s.                  |                         | OPFC            |
| 3519624                          | SLITRK1              | 114798        | NM_052910        | ND                             | 3.7E-02            | ND                    | IHC                     | OPFC            |
| 2512752                          | TBR1                 | 10716         | NM_006593        | ND                             | 3.6E-03            | ND                    | IHC                     | OPFC            |
| 2646818                          | ZIC1                 | 7545          | NM_003412        | 0.90                           | 1.6E-06            | n.s.                  |                         | OPFC            |
| 3137120                          | CA8                  | 767           | NM_004056        | 0.96                           | 6.3E-10            | 7.8E-05               |                         | DLPFC           |
| 2710599                          | CLDN1                | 9076          | NM_021101        | 0.90                           | 1.6E-08            | 0.0043                |                         | DLPFC           |
| 2941784                          | NEDD9                | 4739          | NM_006403        | 0.91                           | 6.9E-07            | 2.6E-05               |                         | DLPFC           |
| 2811145                          | PART1                | 25859         | NM_016590        | 0.94                           | 7.2E-15            | 1.9E-09               |                         | DLPFC           |
| 3318443                          | TRIM22               | 10346         | NM_006074        | 0.38                           | 7.3E-04            | 0.0064                |                         | DLPFC           |
| 3222534                          | ASTN2                | 23245         | NM_198186        | 0.88                           | 1.1E-11            | 1.3E-06               |                         | MPFC            |
| 2980516                          | CNKSR3               | 154043        | NM_173515        | 0.98                           | 2.2E-09            | 6.3E-05               |                         | MPFC            |
| 3258384                          | CYP26A1              | 1592          | NM_000783        | 0.93                           | 1.7E-08            | 0.0007                |                         | MPFC            |
| 2667597                          | GADL1                | 339896        | NM_207359        | 0.94                           | 2.2E-13            | 0.0004                |                         | MPFC            |
| 3587553                          | GREM1                | 26585         | NM_013372        | 0.87                           | 2.6E-08            | 0.0390                |                         | MPFC            |
| 2787459                          | INPP4B               | 8821          | NM_003866        | 0.67                           | 4.0E-05            | n.s.                  |                         | MPFC            |
| 3086809                          | KIAA1456             | 57604         | NM_020844        | 0.81                           | 6.7E-09            | 0.0004                |                         | MPFC            |
| 2962820                          | ME1                  | 4199          | NM_002395        | 0.37                           | 5.6E-07            | 0.0025                |                         | MPFC            |
| 4006280                          | NDP                  | 4693          | NM_000266        | 0.93                           | 1.2E-14            | 1.1E-05               |                         | MPFC            |
| 3473524                          | NOS1                 | 4842          | NM_000620        | ND                             | 1.8E-07            | ND                    | IHC                     | MPFC            |
| 3300749                          | RBP4                 | 5950          | NM_006744        | 0.94                           | 3.4E-06            | 0.0453                |                         | MPFC            |
| 3319073                          | SYT9                 | 143425        | NM_175733        | 0.94                           | 3.7E-13            | 0.0008                |                         | MPFC            |
| 3487600                          | C13orf31             | 144811        | NM_153218        | 0.61                           | 1.8E-04            | n.s.                  |                         | VLPFC           |
| 3102204                          | C8orf34              | 116328        | NM_052958        | 0.83                           | 1.2E-07            | 0.0324                |                         | VLPFC           |
| 3690747                          | CBLN1                | 869           | NM_004352        | 0.96                           | 2.3E-13            | 1.4E-07               | ISH                     | VLPFC           |
| 2805078                          | CDH6                 | 1004          | NM_004932        | 0.96                           | 1.9E-11            | 0.0074                |                         | VLPFC           |
| 3464417                          | MGAT4C               | 25834         | NM_013244        | 0.68                           | 4.1E-04            | n.s.                  |                         | VLPFC           |
| 2966496                          | MCHR2                | 84539         | NM_032503        | 0.97                           | 2.0E-06            | 0.0168                |                         | VLPFC           |
| 2918982                          | GRIK2                | 2898          | NM_175768        | 0.78                           | 1.0E-05            | n.s.                  |                         | VLPFC           |
| 2911003                          | HCRTR2               | 3062          | NM_001526        | 0.87                           | 2.0E-05            | 0.0001                |                         | VLPFC           |
| 3448152                          | ITPR2                | 3709          | NM_002223        | 0.86                           | 3.2E-04            | 0.0163                |                         | VLPFC           |
| 3931495                          | KCNJ6                | 3763          | NM_002240        | 0.85                           | 2.2E-09            | 0.0002                |                         | VLPFC           |
| 2750198                          | NPY5R                | 4889          | NM_006174        | 0.74                           | 8.5E-03            | n.s.                  |                         | VLPFC           |
| 3389954                          | SLN                  | 6588          | NM_003063        | 0.93                           | 7.0E-11            | 1.4E-05               |                         | VLPFC           |
| 2607757                          | CNTN6                | 27255         | NM_014461        | 0.96                           | 5.7E-09            | 0.0028                |                         | MS              |
| 3016380                          | CUTL1                | 1523          | NM_001913        | ND                             | 7.4E-05            | ND                    | IHC                     | MS              |
| 2497812                          | POU3F2               | 5455          | NM_006236        | ND                             | 6.2E-05            | ND                    | IHC                     | MS              |
| 2435383                          | S100A10              | 6281          | NM_002966        | 0.93                           | 7.9E-06            | 0.0058                |                         | MS              |
| 2590715                          | FRZB                 | 2487          | NM_001463        | 0.94                           | 2.1E-06            | 0.0193                |                         | PAS             |
| 2977122                          | NMBR                 | 4829          | NM_002511        | 0.91                           | 2.1E-03            | 0.0022                |                         | PAS             |
| 3181240                          | TMOD1                | 7111          | NM_003275        | ND                             | 1.2E-10            | ND                    | ISH                     | PAS             |
| 3429008                          | ASCL1                | 429           | NM_004316        | ND                             | 6.1E-08            | ND                    | IHC                     | TAS             |
| 3667508                          | CALB2                | 794           | NM_007088        | ND                             | 7.0E-05            | ND                    | IHC                     | TAS             |
| 2490351                          | CTNNA2               | 1496          | NM_004389        | 0.69                           | 5.9E-03            | 0.0045                |                         | TAS             |
| 3324162                          | LUZP2                | 338645        | NM_001009909     | 0.57                           | 1.0E-06            | n.s.                  |                         | TAS             |
| 3589458                          | THBS1                | 7057          | NM_003246        | 0.92                           | 1.4E-07            | 1.1E-05               | ISH                     | TAU             |
| 3219621                          | CTNNA1               | 8727          | NM_003798        | 0.67                           | 9.2E-03            | 0.0001                |                         | OCC             |
| 2632225                          | EPHA3                | 2042          | NM_005233        | 0.94                           | 2.5E-04            | 4.6E-05               |                         | OCC             |
| 2965206                          | EPHA7                | 2045          | NM_004440        | 0.88                           | 2.3E-02            | 0.0001                |                         | OCC             |
| 3799615                          | PTPN2                | 5771          | NM_080423        | 0.90                           | 4.4E-08            | 0.0195                |                         | OCC             |

ND= No data; n.s.= not significant (p>0.05)

**Table S10. Perisylvian NCTX-enriched genes (FDR < 2.0E-4)**

| Exon Array<br>Transcript<br>Cluster ID | Official Gene<br>Symbol | RefSeq<br>Accession | p-value (FDR) | fold-change | has proximal<br>haCNS?<br>(Table S13) |
|----------------------------------------|-------------------------|---------------------|---------------|-------------|---------------------------------------|
| 2343823                                | LPHN2                   | NM_012302           | 2.41E-10      | 1.10        | yes                                   |
| 2778440                                | UNC5C                   | NM_003728           | 4.10E-08      | 1.20        |                                       |
| 3452478                                | AMIGO2                  | NM_181847           | 1.10E-07      | 1.23        |                                       |
| 3896257                                | PROKR2                  | NM_144773           | 1.11E-07      | 1.27        |                                       |
| 3135340                                | OPRK1                   | NM_000912           | 1.54E-07      | 1.25        |                                       |
| 2603987                                | NGEF                    | NM_019850           | 3.38E-07      | 1.07        |                                       |
| 3516639                                | PCDH9                   | NM_203487           | 5.06E-07      | 1.11        | yes                                   |
| 2876793                                | TRPC7                   | NM_020389           | 5.06E-07      | 1.40        |                                       |
| 3262715                                | SORCS3                  | NM_014978           | 5.38E-07      | 1.14        | yes                                   |
| 3154398                                | ST3GAL1                 | NM_003033           | 8.42E-07      | 1.09        |                                       |
| 3002873                                | LANCL2                  | NM_018697           | 9.36E-07      | 1.07        |                                       |
| 3125342                                | SGCZ                    | NM_139167           | 9.36E-07      | 1.19        |                                       |
| 3371114                                | SYT13                   | NM_020826           | 1.59E-06      | 1.07        |                                       |
| 3796620                                | DLGAP1                  | NM_004746           | 1.61E-06      | 1.04        |                                       |
| 3125116                                | DLC1                    | NM_182643           | 1.82E-06      | 1.09        | yes                                   |
| 3238962                                | KIAA1217                | NM_019590           | 1.86E-06      | 1.10        |                                       |
| 3304073                                | KCNIP2                  | NM_014591           | 1.86E-06      | 1.06        |                                       |
| 2593013                                | DNAH7                   | NM_018897           | 1.97E-06      | 1.19        |                                       |
| 3913892                                | EEF1A2                  | NM_001958           | 1.97E-06      | 1.04        |                                       |
| 3326826                                | FJX1                    | NM_014344           | 2.10E-06      | 1.06        | yes                                   |
| 3653266                                | CACNG3                  | NM_006539           | 2.46E-06      | 1.09        | yes                                   |
| 3324162                                | LUZP2                   | NM_001009909        | 3.73E-06      | 1.25        |                                       |
| 2854445                                | DAB2                    | NM_001343           | 4.49E-06      | 1.21        | yes                                   |
| 2362702                                | DUSP23                  | NM_017823           | 4.49E-06      | 1.06        |                                       |
| 2501835                                | DPP10                   | NM_020868           | 4.49E-06      | 1.11        | yes                                   |
| 3148545                                | RSPO2                   | NM_178565           | 4.49E-06      | 1.27        |                                       |
| 2896888                                | CAP2                    | NM_006366           | 4.49E-06      | 1.05        |                                       |
| 2582124                                | NR4A2                   | NM_006186           | 4.49E-06      | 1.19        |                                       |
| 3510126                                | TRPC4                   | NM_016179           | 4.72E-06      | 1.30        |                                       |
| 3908934                                | PTGIS                   | NM_000961           | 4.72E-06      | 1.07        |                                       |
| 2862696                                | ENC1                    | NM_003633           | 4.72E-06      | 1.05        |                                       |
| 3618736                                | RASGRP1                 | NM_005739           | 4.72E-06      | 1.16        |                                       |
| 3184408                                | PALM2-AKAP2             | NM_007203           | 4.88E-06      | 1.07        |                                       |
| 3248661                                | ZNF365                  | NM_014951           | 5.13E-06      | 1.11        | yes                                   |
| 2558612                                | TGFA                    | NM_003236           | 7.00E-06      | 1.13        |                                       |
| 2380590                                | TGFB2                   | NM_003238           | 8.26E-06      | 1.18        |                                       |
| 4001654                                | GPR64                   | NM_001079858        | 8.90E-06      | 1.26        |                                       |
| 2733287                                | PRDM8                   | NM_020226           | 1.16E-05      | 1.06        |                                       |
| 3567050                                | RTN1                    | NM_021136           | 1.16E-05      | 1.03        |                                       |
| 2400177                                | CAMK2N1                 | NM_018584           | 1.16E-05      | 1.03        |                                       |
| 2485636                                | SLC1A4                  | NM_003038           | 1.38E-05      | 1.05        |                                       |
| 2400655                                | RAP1GAP                 | NM_002885           | 1.44E-05      | 1.08        |                                       |
| 3058209                                | MAGI2                   | NM_012301           | 1.68E-05      | 1.04        |                                       |
| 3877892                                | PCSK2                   | NM_002594           | 1.68E-05      | 1.14        |                                       |
| 2805232                                | PDZD2                   | NM_178140           | 1.85E-05      | 1.08        |                                       |
| 3898796                                | KIF16B                  | NM_024704           | 1.97E-05      | 1.10        |                                       |
| 2997376                                | ANLN                    | NM_018685           | 2.00E-05      | 1.23        |                                       |
| 3299945                                | HTR7                    | NM_019859           | 2.00E-05      | 1.22        |                                       |
| 3051655                                | ECOP                    | NM_030796           | 2.10E-05      | 1.06        |                                       |
| 3585272                                | GABRG3                  | NM_033223           | 2.14E-05      | 1.10        |                                       |

|         |              |              |          |      |     |
|---------|--------------|--------------|----------|------|-----|
| 2908154 | C6orf206     | BC029519     | 2.39E-05 | 1.07 |     |
| 3458451 | R3HDM2       | NM_014925    | 2.64E-05 | 1.03 |     |
| 3671202 | CDH13        | NM_001257    | 2.64E-05 | 1.14 | yes |
| 3634256 | LINGO1       | NM_032808    | 2.64E-05 | 1.05 | yes |
| 3811339 | BCL2         | NM_000633    | 2.64E-05 | 1.10 |     |
| 2616804 | STAC         | NM_003149    | 2.68E-05 | 1.11 |     |
| 3682445 | XYLT1        | NM_022166    | 2.68E-05 | 1.04 | yes |
| 3780334 | MC5R         | NM_005913    | 2.72E-05 | 1.16 |     |
| 3090436 | NEFM         | NM_005382    | 2.73E-05 | 1.15 |     |
| 2602368 | DKFZp547H025 | NM_020161    | 2.75E-05 | 1.29 |     |
| 3139722 | NCOA2        | NM_006540    | 3.30E-05 | 1.05 |     |
| 3464747 | KITLG        | NM_000899    | 3.40E-05 | 1.10 |     |
| 2405576 | CSMD2        | NM_052896    | 3.41E-05 | 1.08 |     |
| 2692319 | ADCY5        | NM_183357    | 3.53E-05 | 1.05 |     |
| 2578790 | LRP1B        | NM_018557    | 4.16E-05 | 1.14 |     |
| 3570373 | SLC8A3       | NM_033262    | 4.20E-05 | 1.07 |     |
| 2842255 | CPLX2        | NM_006650    | 4.41E-05 | 1.06 |     |
| 2387606 | CHRM3        | NM_000740    | 4.47E-05 | 1.18 |     |
| 2379009 | PPP2R5A      | NM_006243    | 4.47E-05 | 1.12 |     |
| 3512050 | CCDC122      | NM_144974    | 4.54E-05 | 1.09 |     |
| 2513925 | B3GALT1      | NM_020981    | 4.77E-05 | 1.08 |     |
| 3655687 | PRRT2        | NM_145239    | 4.94E-05 | 1.06 |     |
| 2474019 | DPYSL5       | NM_020134    | 5.05E-05 | 1.04 |     |
| 3019793 | FOXP2        | NM_148898    | 5.40E-05 | 1.11 | yes |
| 3011675 | ZNF804B      | NM_181646    | 5.40E-05 | 1.26 |     |
| 3217242 | GABBR2       | NM_005458    | 5.40E-05 | 1.06 |     |
| 2343025 | AK5          | NM_174858    | 5.90E-05 | 1.16 |     |
| 3111561 | PKHD1L1      | NM_177531    | 6.28E-05 | 1.12 |     |
| 2324097 | PINK1        | NM_032409    | 6.58E-05 | 1.04 |     |
| 3506398 | SHISA2       | NM_001007538 | 6.76E-05 | 1.11 |     |
| 2628482 | FAM19A1      | NM_213609    | 7.09E-05 | 1.16 | yes |
| 2975014 | SGK1         | NM_005627    | 7.22E-05 | 1.09 |     |
| 3447348 | SOX5         | NM_152989    | 7.30E-05 | 1.04 | yes |
| 3148871 | GOLSYN       | NM_001099744 | 7.54E-05 | 1.07 |     |
| 3915936 | NCAM2        | NM_004540    | 7.54E-05 | 1.10 | yes |
| 3371003 | TP53I11      | NM_001076787 | 7.67E-05 | 1.05 |     |
| 3924041 | ADARB1       | NM_001033049 | 7.67E-05 | 1.04 |     |
| 3587495 | SCG5         | NM_003020    | 7.82E-05 | 1.04 |     |
| 3019158 | LRRN3        | NM_001099660 | 7.82E-05 | 1.09 |     |
| 3257850 | TNKS2        | NM_025235    | 7.88E-05 | 1.05 |     |
| 3751237 | SEZ6         | NM_178860    | 7.95E-05 | 1.04 |     |
| 3484497 | FRY          | NM_023037    | 8.19E-05 | 1.07 |     |
| 3553531 | TNFAIP2      | NM_006291    | 8.19E-05 | 1.09 |     |
| 3687363 | DOC2A        | NM_003586    | 8.19E-05 | 1.06 |     |
| 3128911 | STMN4        | NM_030795    | 8.42E-05 | 1.03 |     |
| 4054204 | APOD         | NM_001647    | 8.43E-05 | 1.09 |     |
| 3128271 | NEFL         | NM_006158    | 8.43E-05 | 1.15 |     |
| 2973376 | PTPRK        | NM_002844    | 8.43E-05 | 1.11 | yes |
| 3646613 | A2BP1        | NM_145893    | 8.43E-05 | 1.03 | yes |
| 2825907 | PRR16        | NM_016644    | 8.45E-05 | 1.20 | yes |
| 3741547 | P2RX5        | NM_002561    | 8.83E-05 | 1.12 |     |
| 3193725 | OLFM1        | NM_014279    | 9.58E-05 | 1.04 |     |
| 3921599 | PCP4         | NM_006198    | 9.58E-05 | 1.09 |     |
| 3074912 | DGKI         | NM_004717    | 9.58E-05 | 1.08 |     |
| 2316245 | PRKCZ        | NM_001033582 | 9.69E-05 | 1.03 |     |
| 3562910 | MDGA2        | NM_001113498 | 9.89E-05 | 1.10 | yes |
| 3726618 | CACNA1G      | NM_018896    | 1.01E-04 | 1.13 |     |
| 4026624 | PNCK         | NM_001039582 | 1.01E-04 | 1.07 |     |

|         |           |              |          |      |     |
|---------|-----------|--------------|----------|------|-----|
| 2451958 | PLEKHA6   | NM_014935    | 1.02E-04 | 1.07 |     |
| 2951567 | FKBP5     | NM_004117    | 1.09E-04 | 1.06 | yes |
| 3859668 | LGI4      | NM_139284    | 1.13E-04 | 1.13 |     |
| 2445357 | ASTN1     | NM_004319    | 1.15E-04 | 1.04 | yes |
| 3947863 | PARVB     | NM_001003828 | 1.15E-04 | 1.07 |     |
| 2452667 | RAB7L1    | NM_003929    | 1.15E-04 | 1.10 |     |
| 3958475 | SYN3      | NM_003490    | 1.21E-04 | 1.06 |     |
| 3217167 | CORO2A    | NM_003389    | 1.26E-04 | 1.05 |     |
| 3278401 | FRMD4A    | NM_018027    | 1.30E-04 | 1.03 | yes |
| 3016380 | CUX1      | NM_181552    | 1.31E-04 | 1.07 |     |
| 3897280 | PAK7      | NM_020341    | 1.34E-04 | 1.05 |     |
| 3305801 | SORCS1    | NM_052918    | 1.35E-04 | 1.18 | yes |
| 3438482 | MMP17     | NM_016155    | 1.43E-04 | 1.09 |     |
| 3421985 | KCNMB4    | NM_014505    | 1.43E-04 | 1.02 |     |
| 3589458 | THBS1     | NM_003246    | 1.58E-04 | 1.16 |     |
| 2394478 | CHD5      | NM_015557    | 1.66E-04 | 1.09 |     |
| 2371346 | RGL1      | NM_015149    | 1.67E-04 | 1.04 |     |
| 3190420 | CERCAM    | NM_016174    | 1.67E-04 | 1.06 |     |
| 2626802 | PTPRG     | NM_002841    | 1.67E-04 | 1.06 | yes |
| 3871459 | LOC284296 | BC093900     | 1.67E-04 | 1.11 |     |
| 3495968 | SLITRK5   | NM_015567    | 1.73E-04 | 1.07 | yes |
| 2869880 | EFNA5     | NM_001962    | 1.77E-04 | 1.10 | yes |
| 2881300 | CAMK2A    | NM_015981    | 1.79E-04 | 1.13 |     |
| 3791341 | ZCCHC2    | NM_017742    | 1.79E-04 | 1.04 |     |
| 2931036 | ULBP1     | NM_025218    | 1.87E-04 | 1.17 |     |
| 3422458 | TRHDE     | NM_013381    | 1.91E-04 | 1.26 | yes |
| 3074039 | SLC35B4   | NM_032826    | 1.91E-04 | 1.04 |     |
| 3267036 | GRK5      | NM_005308    | 1.91E-04 | 1.05 |     |
| 3816883 | BRUNOL5   | NM_021938    | 1.97E-04 | 1.04 |     |

**Table S11. Comparison with published adult human brain microarray data**

| Adult human brain enrichment (Roth et al. 2006) | Consistent with late mid-fetal? | ProbelD      | HuEx_BestMatch | Gene    | EntrezGeneID | Accession        | Description                                                               |
|-------------------------------------------------|---------------------------------|--------------|----------------|---------|--------------|------------------|---------------------------------------------------------------------------|
| Cortex                                          | No                              | 1557475_at   |                | 3437267 | ---          | BC037880         | CDNA clone IMAGE:5274197, partial cds                                     |
| Cortex                                          | Yes                             | 224408_at    |                | 2966496 |              | 84539 AF347063   | G protein-coupled receptor 145                                            |
| Cortex                                          | Yes                             | 220025_at    |                | 2512752 |              | 10716 NM_006593  | T-box, brain, 1                                                           |
| Cortex                                          | No                              | 1552715_a_at |                | 2749484 |              | 59350 NM_021634  | leucine-rich repeat-containing G protein-coupled receptor 7               |
| Cortex                                          | Yes                             | 204589_at    |                | 3469597 |              | 9891 NM_014840   | AMP-activated protein kinase family member 5                              |
| Cortex                                          | Yes                             | 215972_at    |                | 2811145 | ---          | AF070547         | CDNA FLJ38449 fis, clone FEBRA2019389                                     |
| Cortex                                          | No                              | 241365_at    |                | 2665196 |              | 6304 AA002140    | CDNA FLJ42259 fis, clone TKIDN2011289                                     |
| Cortex                                          | Yes                             | 203408_s_at  |                | 2665199 |              | 6304 NM_002971   | Special AT-rich sequence binding protein 1                                |
| Cortex                                          | No                              | 222590_s_at  |                | 3715368 |              | 51701 AF180819   | nemo like kinase                                                          |
| Cortex                                          | No                              | 207366_at    |                | 3886758 |              | 3787 NM_002251   | potassium voltage-gated channel, delayed-rectifier, subfamily S, member 1 |
| Cortex                                          | No                              | 235147_at    |                | 2521865 |              | 440928 R56118    | Hypothetical gene supported by AK096649                                   |
| Cortex                                          | No                              | 1558972_s_at |                | 2973340 |              | 387357 BC043608  | chromosome 6 open reading frame 190                                       |
| Cortex                                          | No                              | 212458_at    |                | 2556752 |              | 200734 H97931    | sprouty-related, EVH1 domain containing 2                                 |
| Cortex                                          | ND*                             | 242500_at    | ---            |         | ---          | T87730           | Transcribed locus                                                         |
| Cortex                                          | Yes                             | 215591_at    |                | 2594089 |              | 23314 AK025127   |                                                                           |
| Cortex                                          | Yes                             | 225313_at    |                | 3891643 |              | 63939 AI627538   | chromosome 20 open reading frame 177                                      |
| Cortex                                          | No                              | 240503_at    |                | 2507380 |              | 23518 AW274946   | R3H domain (binds single-stranded nucleic acids) containing               |
| Cortex                                          | No                              | 230137_at    |                | 2784074 |              | 132332 BF673779  | Hypothetical protein FLJ30834                                             |
| Cortex                                          | No                              | 244130_at    |                | 3513211 | ---          | AI379882         | Transcribed locus                                                         |
| Cortex                                          | No                              | 1558293_at   |                | 2346689 |              | 23285 BC037317   | KIAA1107 protein                                                          |
| Amygdala&Hippocampus                            | Yes                             | 215634_at    |                | 2836242 |              | 2890 AF007137    | glutamate receptor, ionotropic, AMPA 1                                    |
| Amygdala&Hippocampus                            | No                              | 210408_s_at  |                | 3529467 |              | 9362 AB009288    | copine VI (CPNeural)                                                      |
| Amygdala&Hippocampus                            | No                              | 229797_at    |                | 2420681 |              | 55283 AI636080   | muclolipin 3                                                              |
| Amygdala&Hippocampus                            | No                              | 233793_at    |                | 2342904 |              | 81849 AU145390   | sialyltransferase 7 E                                                     |
| Amygdala&Hippocampus                            | No                              | 237556_at    |                | 3655213 |              | 440352 AI914160  | Similar to BTG3 associated nuclear protein isoform b                      |
| Amygdala&Hippocampus                            | No                              | 207342_at    |                | 3693401 |              | 1258 NM_001297   | cyclic nucleotide gated channel beta 1                                    |
| Amygdala&Hippocampus                            | No                              | 236782_at    |                | 2973856 |              | 154075 AI129628  | sterile alpha motif domain containing 3                                   |
| Amygdala&Hippocampus                            | No                              | 64899_at     |                | 3821159 |              | 64748 AA209463   | Lipid phosphate phosphatase-related protein type 2                        |
| Amygdala&Hippocampus                            | No                              | 225355_at    |                | 2841120 |              | 54492 AK026748   | Hypothetical protein DKFZP761M1511                                        |
| Amygdala&Hippocampus                            | No                              | 235183_at    |                | 2961345 | ---          | AI479277         | Homo sapiens, clone IMAGE:5312689, mRNA                                   |
| Amygdala&Hippocampus                            | No                              | 234279_at    |                | 3623948 |              | 388121 AL117453  | FLJ41287 protein                                                          |
| Amygdala&Hippocampus                            | No                              | 236195_x_at  |                | 3841102 |              | 5582 AW027690    | protein kinase C, gamma                                                   |
| Amygdala&Hippocampus                            | No                              | 234994_at    |                | 2925590 |              | 114801 AA088177  | KIAA1913                                                                  |
| Amygdala&Hippocampus                            | Yes                             | 244323_at    |                | 3101153 |              | 27319 AI968349   | basic helix-loop-helix domain containing, class B, 5                      |
| Amygdala&Hippocampus                            | No                              | 229552_at    |                | 3473373 |              | 283454 AI698128  | Hypothetical protein LOC283454                                            |
| Amygdala&Hippocampus                            | No                              | 231392_at    |                | 3399672 |              | 89944 T66136     | Hypothetical protein BC008326 [BLAST]                                     |
| Amygdala&Hippocampus                            | No                              | 215126_at    |                | 3635240 | ---          | AL109716         | CDNA FLJ42949 fis, clone BRSTN2006583                                     |
| Amygdala&Hippocampus                            | No                              | 1554474_a_at |                | 2974413 |              | 26002 BC018756   | monooxygenase, DBH-like 1                                                 |
| Amygdala&Hippocampus                            | No                              | 1570515_a_at |                | 2961347 |              | 27145 BC029425   | filamin A interacting protein 1                                           |
| Amygdala&Hippocampus                            | No                              | 206864_s_at  |                | 3473378 |              | 8739 NM_003806   | harakiri, BCL2 interacting protein (contains only BH3 domain)             |
| Accumbens&Putamen                               | No                              | 1554242_a_at |                | 3531163 |              | 1690 BC007230    | coagulation factor C homolog, cochlin (Limulus polyphemus)                |
| Accumbens&Putamen                               | Yes                             | 205013_s_at  |                | 3940099 |              | 135 NM_000675    | adenosine A2a receptor                                                    |
| Accumbens&Putamen                               | No                              | 242054_s_at  |                | 2479943 |              | 6496 AW473656    | sine oculis homeobox homolog 3 (Drosophila)                               |
| Accumbens&Putamen                               | Yes                             | 215343_at    |                | 3576441 |              | 440193 AF070587  | Similar to O61001D24Rik protein                                           |
| Accumbens&Putamen                               | No                              | 214655_at    |                | 2921022 |              | 2830 U18549      | G protein-coupled receptor 6                                              |
| Accumbens&Putamen                               | Yes                             | 1569648_at   |                | 2985497 |              | 168002 AF318336  | dapper homolog 2, antagonist of beta-catenin (xenopus)                    |
| Accumbens&Putamen                               | No                              | 1552575_a_at |                | 2909772 |              | 135398 NM_153344 | chromosome 6 open reading frame 141                                       |
| Accumbens&Putamen                               | No                              | 230271_at    |                | 3789771 | ---          | BG150301         | Homo sapiens, clone IMAGE:4512785, mRNA                                   |
| Accumbens&Putamen                               | No                              | 239911_at    |                | 3789727 |              | 9480 H49805      | Full-length cDNA clone CS0DJ013YP06 of T cells (Jurkat cell line)         |
| Accumbens&Putamen                               | Yes                             | 243582_at    |                | 2833924 |              | 153769 AW082633  | SH3 domain containing ring finger 2                                       |
| Accumbens&Putamen                               | No                              | 233388_at    |                | 3628498 |              | 771 AK022350     | carbonic anhydrase XII                                                    |
| Accumbens&Putamen                               | No                              | 1557465_at   |                | 3514685 |              | 283521 AK094626  | Hypothetical protein FLJ37307                                             |
| Accumbens&Putamen                               | Yes                             | 227228_s_at  |                | 3576441 |              | 440193 AB040942  | KIAA1509                                                                  |
| Accumbens&Putamen                               | Yes                             | 229637_at    |                | 3430331 |              | 55188 AA166891   | Brain synembryn                                                           |
| Accumbens&Putamen                               | Yes                             | 206518_s_at  |                | 3731543 |              | 8787 NM_003835   | regulator of G-protein signalling 9                                       |

|                   |     |              |                   |     |                  |                                                                     |
|-------------------|-----|--------------|-------------------|-----|------------------|---------------------------------------------------------------------|
| Accumbens&Putamen | No  | 233446_at    | 3789766           | --- | AU145336         | CDNA FLJ11655 fis, clone HEMBA1004554                               |
| Accumbens&Putamen | No  | 214608_s_at  | 3140037 EYA1      |     | 2138 AJ000098    | eyes absent homolog 1 (Drosophila)                                  |
| Accumbens&Putamen | No  | 218081_at    | 3895679 C20orf27  |     | 54976 NM_017874  | chromosome 20 open reading frame 27                                 |
| Accumbens&Putamen | Yes | 1555292_at   | 3023483 FAM40B    |     | 57464 BC019064   | family with sequence similarity 40, member B                        |
| Accumbens&Putamen | Yes | 225165_at    | 3720322 PPP1R1B   |     | 84152 AK024593   | protein phosphatase 1, regulatory (inhibitor) subunit 1B (DARPP-32) |
| Putamen           | Yes | 237492_at    | 2984275 PDE10A    |     | 10846 R37728     | ---                                                                 |
| Thalamus          | No  | 243154_at    | 3035988           | --- | AA215381         | Transcribed locus                                                   |
| Thalamus          | Yes | 208443_x_at  | 2702610 SHOX2     |     | 6474 NM_006884   | short stature homeobox 2                                            |
| Thalamus          | Yes | 209325_s_at  | 2447148 RGS16     |     | 6004 U94829      | regulator of G-protein signalling 16                                |
| Thalamus          | No  | 225450_at    | 3345222 AMOTL1    |     | 154810 AI433831  | angiomin like 1                                                     |
| Thalamus          | Yes | 242348_at    | 2681044 FAM19A4   |     | 151647 AA757457  | TAFA4 protein                                                       |
| Thalamus          | No  | 237302_at    | 2980516           | --- | BF445031         | Transcribed locus                                                   |
| Thalamus          | Yes | 203997_at    | 3219885 PTPN3     |     | 5774 NM_002829   | protein tyrosine phosphatase, non-receptor type 3                   |
| Thalamus          | Yes | 236088_at    | 2349863 NTNG1     |     | 22854 AV723308   | netrin G1                                                           |
| Thalamus          | Yes | 210609_s_at  | 2544201 TP53I3    |     | 9540 BC000474    | tumor protein p53 inducible protein 3                               |
| Thalamus          | No  | 226103_at    | 2343231 NEXN      |     | 91624 AF114264   | nexilin (F actin binding protein)                                   |
| Thalamus          | No  | 219772_s_at  | 4002394 SMPX      |     | 23676 NM_014332  | small muscle protein, X-linked                                      |
| Thalamus          | Yes | 229103_at    | 3760490           |     | 7473 AA463626    | Transcribed locus                                                   |
| Thalamus          | Yes | 212759_s_at  | 3264621 TCF7L2    |     | 6934 AI703074    | Transcription factor 7-like 2 (T-cell specific, HMG-box)            |
| Thalamus          | No  | 230466_s_at  | 3460125           | --- | AI092770         | Mesenchymal stem cell protein DSC96                                 |
| Thalamus          | Yes | 219295_s_at  | 2698996 PCOLCE2   |     | 26577 NM_013363  | procollagen C-endopeptidase enhancer 2                              |
| Thalamus          | No  | 229779_at    | 2602110           |     | 1286 BF476080    | CDNA clone IMAGE:30367357, partial cds                              |
| Thalamus          | No  | 1568868_at   | 2574720 FLJ16008  |     | 339761 BC039307  | FLJ16008 protein                                                    |
| Thalamus          | No  | 222073_at    | 2530425 COL4A3    |     | 1285 AI694562    | collagen, type IV, alpha 3 (Goodpasture antigen)                    |
| Thalamus          | No  | 210221_at    | 3634656 CHRNA3    |     | 1136 BC000513    | cholinergic receptor, nicotinic, alpha polypeptide 3                |
| Thalamus          | No  | 237974_at    | 3535307 C14orf29  |     | 145447 BE502594  | chromosome 14 open reading frame 29                                 |
| Cerebellum        | No  | 206914_at    | 3353417 CRTAM     |     | 56253 NM_019604  | Class-I MHC-restricted T cell associated molecule                   |
| Cerebellum        | Yes | 207182_at    | 2838399 GABRA6    |     | 2559 NM_000811   | gamma-aminobutyric acid (GABA) A receptor, alpha 6                  |
| Cerebellum        | No  | 236793_at    | 2665720           | --- | R43675           | Transcribed locus                                                   |
| Cerebellum        | No  | 203616_at    | 3096171 POLB      |     | 5423 NM_002690   | polymerase (DNA directed), beta                                     |
| Cerebellum        | No  | 213929_at    | 3390193           | --- | AL050204         | Homo sapiens, Similar to likely ortholog of yeast ARV1              |
| Cerebellum        | No  | 1559283_a_at | 3081072 LOC285888 |     | 285888 AI147733  | Hypothetical protein LOC285888                                      |
| Cerebellum        | No  | 235221_at    | 3558270           | --- | R52665           | Clone DNA71180 cerebellin (UNQ755) mRNA, complete cds               |
| Cerebellum        | No  | 211343_s_at  | 3250486 COL13A1   |     | 1305 M33653      | collagen, type XIII, alpha 1                                        |
| Cerebellum        | No  | 214705_at    | 2339139 INADL     |     | 10207 AJ001306   | InaD-like protein                                                   |
| Cerebellum        | No  | 1553911_at   | 3907889 ZNF663    |     | 284747 NM_173643 | Hypothetical protein DKFZp547G0215                                  |
| Cerebellum        | No  | 233435_at    | 3401375           |     | 10867 AK024470   | Similar to ribosomal protein L13a; 23 kD highly basic protein       |
| Cerebellum        | Yes | 214734_at    | 3390195 SLAC2-B   |     | 23086 AB014524   | SLAC2-B                                                             |
| Cerebellum        | No  | 240448_at    | 3777991 KIAA0802  |     | 23255 R41450     | KIAA0802                                                            |
| Cerebellum        | Yes | 243509_at    | 3465409 ---       |     | 694 AI475680     | Hypothetical protein LOC256021                                      |
| Cerebellum        | Yes | 226652_at    | 3597603 USP3      |     | 9960 AA523542    | ubiquitin specific protease 3                                       |
| Cerebellum        | Yes | 227971_at    | 3986087 NRK       |     | 203447 AI653107  | Nik related kinase                                                  |
| Cerebellum        | No  | 205380_at    | 2356425 PDZK1     |     | 5174 NM_002614   | PDZ domain containing 1                                             |
| Cerebellum        | Yes | 231776_at    | 2667024 EOMES     |     | 8320 NM_005442   | eomesodermin homolog (Xenopus laevis)                               |
| Cerebellum        | ND  | 239344_at    | ---               | --- | H23542           | ---                                                                 |
| Cerebellum        | No  | 231051_at    | 3290851           | --- | W69743           | MRNA of muscle specific gene M1.                                    |
| Cerebellum        | Yes | 1552439_s_at | 3629948 MEGF11    |     | 84465 NM_032445  | MEGF11 protein                                                      |
| Cerebellum        | No  | 1552848_a_at | 3971666 FLJ30296  |     | 139411 NM_173495 | patched domain containing 1                                         |
| Cerebellum        | No  | 1552922_at   | 2913123 RIMS1     |     | 22999 NM_014989  | regulating synaptic membrane exocytosis 1                           |
| Cerebellum        | No  | 1553826_a_at | 3642993 LOC146325 |     | 146325 NM_145270 | similar to hypothetical protein FLJ13841                            |
| Cerebellum        | No  | 1554250_s_at | 3055763 MGC45477  |     | 375593 BC033812  | Tripartite motif-containing 50B                                     |
| Cerebellum        | Yes | 1554481_a_at | 2327677 EPB41     |     | 2035 BC039079    | erythrocyte membrane protein band 4.1                               |
| Cerebellum        | Yes | 1554593_s_at | 3853036 SLC1A6    |     | 6511 BC028721    | solute carrier family 1, member 6                                   |
| Cerebellum        | No  | 1554643_at   | 3675020 RGS11     |     | 8786 BC040504    | regulator of G-protein signalling 11                                |
| Cerebellum        | No  | 1556202_at   | 2431768 FNBP2     |     | 23380 AI263819   | SLIT-ROBO Rho GTPase activating protein 2                           |
| Cerebellum        | No  | 1556383_at   | 2360027           |     | 6232 N20130      | Ribosomal protein S27 (metallopanstimulin 1)                        |
| Cerebellum        | No  | 1556425_a_at | 3778108 LOC284219 |     | 284219 BF509747  | hypothetical protein LOC284219                                      |
| Cerebellum        | No  | 1556493_a_at | 3161566           |     | 23081 AF085959   | Jumonji domain containing 2C                                        |
| Cerebellum        | No  | 1556580_a_at | 3085594           |     | 346702 BE044068  | Similar to tryptophan/serine protease                               |
| Cerebellum        | No  | 1556762_a_at | 3085403           |     | 4482 AI057305    | Methionine sulfoxide reductase A                                    |



|            |     |              |                   |                 |                                                                            |
|------------|-----|--------------|-------------------|-----------------|----------------------------------------------------------------------------|
| Cerebellum | No  | 1557193_at   | 3799669           | 5771 AI085450   | Protein tyrosine phosphatase, non-receptor type 2                          |
| Cerebellum | No  | 1557512_at   | 2527358           | 6249 BM664532   |                                                                            |
| Cerebellum | No  | 1557889_at   | 3326950           | 143458 BC006326 | Hypothetical protein LOC143458                                             |
| Cerebellum | No  | 1558041_a_at | 3695450 LOC283849 | 283849 AL834156 | hypothetical protein LOC283849                                             |
| Cerebellum | No  | 1558118_at   | 3952406           | 25787 BU584635  |                                                                            |
| Cerebellum | ND  | 1560026_at   | ---               | 149401 BC037944 | Hypothetical protein LOC149401                                             |
| Cerebellum | No  | 1560476_at   | 3904663           | 140710 AF290476 | KIAA0889 protein                                                           |
| Cerebellum | ND  | 1560512_at   | ---               | ---             | BQ027635 CDNA FLJ30409 fis, clone BRACE2008615                             |
| Cerebellum | Yes | 1560728_at   | 3163818           | 6456 AL833050   | SH3-domain GRB2-like 2                                                     |
| Cerebellum | No  | 1561130_at   | 3472000 FLJ34154  | 283450 AF086006 | Hypothetical protein FLJ34154                                              |
| Cerebellum | No  | 1562684_at   | 2914640           | ---             | AL049377 MRNA; cDNA DKFZp586H0718 (from clone DKFZp586H0718)               |
| Cerebellum | No  | 1563104_at   | 3642875 C22orf1   | 9727 BC009036   | RAB11 family interacting protein 3 (class II)                              |
| Cerebellum | ND  | 1563243_at   | ---               | ---             | AL137408 MRNA; cDNA DKFZp434M242 (from clone DKFZp434M242)                 |
| Cerebellum | Yes | 1566465_at   | 2385873 KCNK1     | 3775 AL833343   | Potassium channel, subfamily K, member 1                                   |
| Cerebellum | No  | 1569041_at   | 3291682           | 221037 BC035102 | Similar to jumonji domain containing 1A; testis-specific protein A         |
| Cerebellum | No  | 1569369_at   | 2757796 ZFYVE28   | 57732 BC035793  | zinc finger, FYVE domain containing 28                                     |
| Cerebellum | No  | 1569445_at   | 3954053           | 26220 BC033112  | DiGeorge syndrome critical region gene 5 (non-coding)                      |
| Cerebellum | No  | 1569446_x_at | 3954053           | 26220 BC033112  | DiGeorge syndrome critical region gene 5 (non-coding)                      |
| Cerebellum | No  | 1570151_at   | 3016534           | 1523 BC013779   |                                                                            |
| Cerebellum | Yes | 202761_s_at  | 3539724 SYNE2     | 23224 NM_015180 | spectrin repeat containing, nuclear envelope 2                             |
| Cerebellum | No  | 203047_at    | 2887048 STK10     | 6793 NM_005990  | Serine/threonine kinase 10                                                 |
| Cerebellum | Yes | 203705_s_at  | 2523045 FZD7      | 8324 AI333651   | frizzled homolog 7 (Drosophila)                                            |
| Cerebellum | Yes | 203910_at    | 2423829 PARG1     | 9411 NM_004815  | PTPL1-associated RhoGAP 1                                                  |
| Cerebellum | No  | 204270_at    | 2316379 SKI       | 6497 AI568728   | v-ski sarcoma viral oncogene homolog (avian)                               |
| Cerebellum | No  | 204431_at    | 3846076 TLE2      | 7089 NM_003260  | transducin-like enhancer of split 2 (E(sp1) homolog, Drosophila)           |
| Cerebellum | No  | 205466_s_at  | 2760869 HS3ST1    | 9957 NM_005114  | heparan sulfate (glucosamine) 3-O-sulfotransferase 1                       |
| Cerebellum | No  | 205528_s_at  | 3144346 CBF42T1   | 862 X79990      | runt-related transcription factor 1; translocated to, 1 (cyclin D-related) |
| Cerebellum | No  | 205728_at    | 4020655 SH2D1A    | 10178 AL022718  | CDNA clone IMAGE:4811759, partial cds                                      |
| Cerebellum | Yes | 205747_at    | 3690747 CBLN1     | 869 NM_004352   | cerebellin 1 precursor                                                     |
| Cerebellum | No  | 206088_at    | 3767230 KIAA0563  | 9884 NM_014834  | hypothetical LOC440457                                                     |
| Cerebellum | Yes | 206163_at    | 3509411 MAB21L1   | 4081 NM_005584  | mab-21-like 1 (C. elegans)                                                 |
| Cerebellum | Yes | 206243_at    | 2663130 TIMP4     | 7079 NM_003256  | tissue inhibitor of metalloproteinase 4                                    |
| Cerebellum | No  | 206282_at    | 2590491 NEUROD1   | 4760 NM_002500  | neurogenic differentiation 1                                               |
| Cerebellum | No  | 206501_x_at  | 3039177 ETV1      | 2115 NM_004956  | ets variant gene 1                                                         |
| Cerebellum | Yes | 206502_s_at  | 3879112 INSM1     | 3642 NM_002196  | insulinoma-associated 1                                                    |
| Cerebellum | No  | 207060_at    | 3033307 EN2       | 2020 NM_001427  | engrailed homolog 2                                                        |
| Cerebellum | No  | 207110_at    | 3714779 KCNJ12    | 3768 NM_021012  | potassium inwardly-rectifying channel, subfamily J, member 12              |
| Cerebellum | No  | 207164_s_at  | 2388794 ZNF238    | 10472 NM_006352 | zinc finger protein 238                                                    |
| Cerebellum | Yes | 207182_at    | 2838399 GABRA6    | 2559 NM_000811  | gamma-aminobutyric acid (GABA) A receptor, alpha 6                         |
| Cerebellum | Yes | 207197_at    | 3992747 ZIC3      | 7547 NM_003413  | Zic family member 3 heterotaxy 1 (odd-paired homolog, Drosophila)          |
| Cerebellum | No  | 207637_at    | 3430620 KIAA0789  | 9671 NM_014653  |                                                                            |
| Cerebellum | Yes | 207822_at    | 3132016 FGFFR1    | 2260 NM_023107  | fibroblast growth factor receptor 1                                        |
| Cerebellum | No  | 207933_at    | 3684007 ZP2       | 7783 NM_003460  | zona pellucida glycoprotein 2 (sperm receptor)                             |
| Cerebellum | Yes | 208153_s_at  | 2882026 FAT2      | 2196 NM_001447  | FAT tumor suppressor homolog 2 (Drosophila)                                |
| Cerebellum | No  | 209344_at    | 3823511 TPM4      | 7171 BC002827   | tropomyosin 4                                                              |
| Cerebellum | No  | 210191_s_at  | 2428699 PHTF1     | 10745 BC002447  | putative homeodomain transcription factor 1                                |
| Cerebellum | Yes | 210341_at    | 3893973 MYT1      | 4661 AB020642   | myelin transcription factor 1                                              |
| Cerebellum | No  | 211419_s_at  | 2994835 CHN2      | 1124 L29126     | chimerin (chimaerin) 2                                                     |
| Cerebellum | No  | 212311_at    | 2764192 KIAA0746  | 23231 AA522514  | KIAA0746 protein                                                           |
| Cerebellum | No  | 212472_at    | 3320717 MICAL2    | 9645 BE965029   | flavoprotein oxidoreductase MICAL2                                         |
| Cerebellum | Yes | 212825_at    | 3080843 PAXIP1L   | 22976 AI357401  | PAX transcription activation domain interacting protein 1 like             |
| Cerebellum | Yes | 213552_at    | 3599709 GLCE      | 26035 W87398    | glucuronyl C5-epimerase                                                    |
| Cerebellum | No  | 213929_at    | 3390193           | ---             | AL050204 Homo sapiens, Similar to likely ortholog of yeast ARV1            |
| Cerebellum | Yes | 214734_at    | 3390195 SLAC2-B   | 23086 AB014524  | SLAC2-B                                                                    |
| Cerebellum | No  | 214936_at    | 3488602 CHDC1     | 23143 AW298219  | Leucine-rich repeats and calponin homology (CH) domain containing 1        |
| Cerebellum | No  | 215290_at    | 2866137           | ---             | AI480014 Clone 24571 mRNA sequence                                         |
| Cerebellum | No  | 215550_at    | 2662087 SRGAP2    | 9901 AL137457   | SLIT-ROBO Rho GTPase activating protein 3                                  |
| Cerebellum | No  | 218014_at    | 3734708 PCNT1     | 79902 NM_024844 | pericentrin 1                                                              |
| Cerebellum | No  | 219179_at    | 3538087 DACT1     | 51339 NM_016651 | dapper homolog 1, antagonist of beta-catenin (xenopus)                     |
| Cerebellum | Yes | 219648_at    | 2598496 FLJ10116  | 55686 NM_018000 | likely ortholog of mouse dilute suppressor                                 |

|            |     |             |                      |                 |                                                                         |
|------------|-----|-------------|----------------------|-----------------|-------------------------------------------------------------------------|
| Cerebellum | No  | 219751_at   | 3663363 FLJ21148     | 79918 NM_024860 | hypothetical protein FLJ21148                                           |
| Cerebellum | Yes | 219935_at   | 3927480 ADAMTS5      | 11096 NM_007038 | a disintegrin-like and metalloprotease with thrombospondin type 1 motif |
| Cerebellum | No  | 220711_at   | 2844453              | ---             | NM_024978                                                               |
| Cerebellum | No  | 221910_at   | 3039177 LOC221810    | 2115 BF131965   | hypothetical protein LOC221810                                          |
| Cerebellum | Yes | 222164_at   | 3132016              | 2260 AU145411   | Fibroblast growth factor receptor 1                                     |
| Cerebellum | No  | 222372_at   | 2680298              | 9223 AW971248   | Hypothetical protein LOC151878                                          |
| Cerebellum | No  | 222457_s_at | 3454331 EPLIN        | 51474 BC001247  | epithelial protein lost in neoplasm beta                                |
| Cerebellum | No  | 223551_at   | 2923868 PKIB         | 5570 AF225513   | protein kinase (cAMP-dependent, catalytic) inhibitor beta               |
| Cerebellum | No  | 225481_at   | 3535515 C14orf31     | 122786 AL040051 |                                                                         |
| Cerebellum | Yes | 226652_at   | 3597603 USP3         | 9960 AA523542   | Ubiquitin specific protease 3                                           |
| Cerebellum | No  | 226677_at   | 3801943 ZNF521       | 25925 AF141339  | zinc finger protein 521                                                 |
| Cerebellum | No  | 227134_at   | 2772968 SYTL1        | 285521 AI341537 | synaptotagmin-like 1                                                    |
| Cerebellum | No  | 227329_at   | 3914114 BTBD4        | 140685 AU156821 | BTB (POZ) domain containing 4                                           |
| Cerebellum | Yes | 227354_at   | 3142217 PAG          | 55824 BF589359  | FLJ37858 protein                                                        |
| Cerebellum | No  | 227526_at   | 3396770              | 50937 AU151222  | Full length insert cDNA clone ZD42A08                                   |
| Cerebellum | No  | 228081_at   | 2732391 CCNG2        | 901 BF061444    | Cyclin G2                                                               |
| Cerebellum | No  | 228751_at   | 2889698 CLK4         | 57396 AW975057  | CDC-like kinase 4                                                       |
| Cerebellum | No  | 228776_at   | 3759335              | 10052 AA430014  | Gap junction protein, alpha 7, 45kDa (connexin 45)                      |
| Cerebellum | Yes | 228922_at   | 3622282 LOC90525     | 90525 AI760446  | hypothetical protein BC007586                                           |
| Cerebellum | No  | 229141_at   | 2575054 WDR33        | 55339 AW275379  | WD repeat domain 33                                                     |
| Cerebellum | No  | 229193_at   | 3726772 LUC7A        | 51747 AA005430  | Cisplatin resistance-associated overexpressed protein                   |
| Cerebellum | No  | 230270_at   | 2350287 FLJ10330     | 55119 N32872    | sarcoma antigen NY-SAR-27                                               |
| Cerebellum | No  | 230424_at   | 2870889 C5orf13      | 9315 AU144860   | chromosome 5 open reading frame 13                                      |
| Cerebellum | No  | 230928_at   | 2614620              | ---             | H15173                                                                  |
| Cerebellum | No  | 231399_at   | 3421762              | ---             | BE671491                                                                |
| Cerebellum | Yes | 231776_at   | 2667024 EOMES        | 8320 NM_005442  | eomesodermin homolog (Xenopus laevis)                                   |
| Cerebellum | No  | 231858_x_at | 3377861 DKFZp761E198 | 91056 BC004895  | hypothetical protein DKFZp761E198                                       |
| Cerebellum | No  | 232286_at   | 2566848              | 3899 AA572675   | Lymphoid nuclear protein related to AF4                                 |
| Cerebellum | No  | 232565_at   | 3400413              | 23085 AK025052  | RAB6 interacting protein 2                                              |
| Cerebellum | No  | 232726_at   | 2786937              | 55534 AK024956  | Homo sapiens, clone IMAGE:5194204, mRNA                                 |
| Cerebellum | No  | 232935_at   | 3510450              | 10186 AA569225  | Lipoma HMGIC fusion partner                                             |
| Cerebellum | No  | 233167_at   | 3950668 SELO         | 83642 BC001099  | selenoprotein O                                                         |
| Cerebellum | No  | 233249_at   | 2486360              | ---             | AU155297                                                                |
| Cerebellum | No  | 233393_at   | 3085403              | 4482 AU146871   | CDNA FLJ13313 fis, clone OVARC1001489                                   |
| Cerebellum | No  | 233435_at   | 3401375              | 10867 AK024470  | Methionine sulfoxide reductase A                                        |
| Cerebellum | No  | 234012_at   | 2323172              | 84966 AB007966  | Ribosomal protein S27 (metalloproteinase 1)                             |
| Cerebellum | Yes | 234563_at   | 3407453              | 5139 AK000795   | Hypothetical protein MGC15730                                           |
| Cerebellum | No  | 235221_at   | 3558270              | ---             | Phosphodiesterase 3A, cGMP-inhibited                                    |
| Cerebellum | Yes | 235795_at   | 3368054 PAX6         | ---             | R52665                                                                  |
| Cerebellum | ND  | 236229_at   | ---                  | 5080 AW088232   | KIAA0323                                                                |
| Cerebellum | Yes | 236379_at   | 2327677              | 400721 AW014345 | Paired box gene 6 (aniridia, keratitis)                                 |
| Cerebellum | No  | 236660_at   | 2964226              | 2035 AW771958   | Erythrocyte membrane protein band 4.1 (elliptocytosis 1, RH-linked)     |
| Cerebellum | No  | 236750_at   | 3545634              | ---             | N25555                                                                  |
| Cerebellum | No  | 236793_at   | 2665720              | 9369 AL134451   | Transcribed locus                                                       |
| Cerebellum | Yes | 236896_at   | 2646818              | ---             | Neurexin 3                                                              |
| Cerebellum | No  | 236966_at   | 2644461 HSPC056      | ---             | R43675                                                                  |
| Cerebellum | No  | 237341_at   | 3085403              | 7545 R37848     | Transcribed locus                                                       |
| Cerebellum | No  | 237347_at   | 2913446 C6orf148     | 25852 BF942281  | Transcribed locus                                                       |
| Cerebellum | ND  | 237665_at   | ---                  | 4482 H98180     | armadillo repeat containing 8                                           |
| Cerebellum | Yes | 238532_at   | 3571059 DPF3         | 80759 AL039379  | Methionine sulfoxide reductase A                                        |
| Cerebellum | No  | 238593_at   | 3336486 C11orf80     | ---             | Chromosome 6 open reading frame 148                                     |
| Cerebellum | ND  | 238999_at   | ---                  | ---             | AA020752                                                                |
| Cerebellum | No  | 239173_at   | 2339139 INADL        | 8110 AI125562   | D4, zinc and double PHD fingers, family 3                               |
| Cerebellum | No  | 239285_at   | 3161566              | 79703 AW962511  | hypothetical protein FLJ22531                                           |
| Cerebellum | No  | 239577_at   | 4012757              | ---             | Transcribed locus                                                       |
| Cerebellum | Yes | 239597_at   | 3483159              | ---             | AI610347                                                                |
| Cerebellum | ND  | 239731_at   | ---                  | 10207 AI697184  | Transcribed locus                                                       |
| Cerebellum | No  | 239832_at   | 3173797              | 23081 AI341227  | InaD-like (Drosophila)                                                  |
| Cerebellum | Yes | 241383_at   | 3757538              | ---             | Jumonji domain containing 2C                                            |
| Cerebellum | No  | 241391_at   | 3291682              | ---             | AV699781                                                                |
|            |     |             |                      | 255967 AA993566 | PABP1-dependent poly A-specific ribonuclease subunit PAN3               |
|            |     |             |                      | ---             | Transcribed locus                                                       |
|            |     |             |                      | ---             | AI674685                                                                |
|            |     |             |                      | 116224 AI264135 | Transcribed locus                                                       |
|            |     |             |                      | 201181 H05959   | Chromosome 9 open reading frame 42                                      |
|            |     |             |                      | ---             | Similar to hypothetical protein A930006D11                              |
|            |     |             |                      | ---             | AA654772                                                                |
|            |     |             |                      | ---             | Transcribed locus                                                       |

|            |     |              |                   |        |           |                                                                 |
|------------|-----|--------------|-------------------|--------|-----------|-----------------------------------------------------------------|
| Cerebellum | No  | 242699_at    | 3110789           | 23414  | AW384895  | Zinc finger protein, multitype 2                                |
| Cerebellum | ND  | 242931_at    | ---               | ---    | AI218358  | Transcribed locus                                               |
| Cerebellum | ND  | 243077_at    | ---               | ---    | AW664702  | CDNA FLJ16734 fis, clone BRACE2002589                           |
| Cerebellum | No  | 243398_at    | 3376914           | 9379   | AL134012  |                                                                 |
| Cerebellum | Yes | 243509_at    | 3465409 BTG1      | 694    | AI475680  | Hypothetical protein LOC256021                                  |
| Cerebellum | No  | 244420_at    | 3144346           | 862    | AI128130  | Core-binding factor, runt domain, alpha subunit 2               |
| Cerebellum | No  | 244467_at    | 3962112           | 440829 | AW136354  | LOC440829                                                       |
| Cerebellum | No  | 244751_at    | 3848480 PCP2      | 126006 | BF222920  | Purkinje cell protein 2                                         |
| Cerebellum | Yes | 36545_s_at   | 3942998 KIAA0542  | 9814   | AB011114  | Sfi1 homolog, spindle assembly associated (yeast)               |
| Cerebellum | No  | 1553479_at   | 3834744 FLJ90805  | 284339 | NM_173633 | hypothetical protein FLJ90805                                   |
| Cerebellum | Yes | 1553990_at   | 3676610 C16orf79  | 283870 | BC039154  | hypothetical protein MGC21830                                   |
| Cerebellum | No  | 1556096_s_at | 3594608 UNC13C    | 440279 | AL834407  | unc-13 homolog C (C. elegans)                                   |
| Cerebellum | No  | 1556629_a_at | 3876245 SNAP25    | 6616   | AI806346  | Synaptosomal-associated protein, 25kDa                          |
| Cerebellum | No  | 1556761_at   | 3085403           | 4482   | AI057305  | Methionine sulfoxide reductase A                                |
| Cerebellum | No  | 1557089_at   | 2509900 KIF5C     | 3800   | CA449408  | kinesin family member 5C                                        |
| Cerebellum | No  | 1560411_at   | 3646613           | 54715  | BC041965  | ---                                                             |
| Cerebellum | ND  | 1560924_at   | ---               | ---    | Z39232    | CDNA FLJ33351 fis, clone BRACE2005063                           |
| Cerebellum | No  | 1561155_at   | 3621417           | 117155 | W76548    | Creatine kinase, mitochondrial 1 (ubiquitous)                   |
| Cerebellum | No  | 1566040_at   | 2889305           | ---    | BM263698  | Similar to ankyrin repeat domain 20A                            |
| Cerebellum | No  | 1568955_at   | 2431721           | 440608 | BE877775  | ---                                                             |
| Cerebellum | Yes | 200920_s_at  | 3465409 BTG1      | 694    | AL535380  | B-cell translocation gene 1, anti-proliferative                 |
| Cerebellum | Yes | 202181_at    | 3542145 KIAA0247  | 9766   | NM_014734 | KIAA0247                                                        |
| Cerebellum | No  | 202392_s_at  | 3957938 PISD      | 23761  | NM_014338 | phosphatidylserine decarboxylase                                |
| Cerebellum | No  | 202743_at    | 2410470 PIK3R3    | 8503   | BE622627  | phosphoinositide-3-kinase, regulatory subunit 3 (p55, gamma)    |
| Cerebellum | No  | 203140_at    | 2709778 BCL6      | 604    | NM_001706 | B-cell CLL/lymphoma 6 (zinc finger protein 51)                  |
| Cerebellum | Yes | 203298_s_at  | 2896177 JARID2    | 3720   | NM_004973 | Jumonji, AT rich interactive domain 2                           |
| Cerebellum | No  | 203616_at    | 3096171 POLB      | 5423   | NM_002690 | polymerase (DNA directed), beta                                 |
| Cerebellum | Yes | 204428_s_at  | 3696035 LCAT      | 3931   | NM_000229 | lecithin-cholesterol acyltransferase                            |
| Cerebellum | No  | 204538_x_at  | 3684100 NPIP      | 440341 | NM_006985 | nuclear pore complex interacting protein                        |
| Cerebellum | Yes | 204647_at    | 3855358 HOMER3    | 9454   | NM_004838 | homer homolog 3 (Drosophila)                                    |
| Cerebellum | Yes | 204679_at    | 2385873 KCNK1     | 3775   | NM_002245 | potassium channel, subfamily K, member 1                        |
| Cerebellum | No  | 205022_s_at  | 3575567 CHES1     | 1112   | NM_005197 | checkpoint suppressor 1                                         |
| Cerebellum | No  | 205795_at    | 3545634 NRXN3     | 9369   | NM_004796 | neurexin 3                                                      |
| Cerebellum | Yes | 205923_at    | 3065740 RELN      | 5649   | NM_005045 | reelin                                                          |
| Cerebellum | Yes | 206373_at    | 2646818 ZIC1      | 7545   | NM_003412 | Zic family member 1 (odd-paired homolog, Drosophila)            |
| Cerebellum | Yes | 206409_at    | 3928668 TIAM1     | 7074   | NM_003253 | T-cell lymphoma invasion and metastasis 1                       |
| Cerebellum | No  | 207299_s_at  | 2929571 GRM1      | 2911   | NM_000838 | glutamate receptor, metabotropic 1                              |
| Cerebellum | Yes | 207711_at    | 3904594 KIAA0889  | 25781  | NM_015377 | KIAA0889 protein                                                |
| Cerebellum | Yes | 208353_x_at  | 3132940 ANK1      | 286    | NM_020480 | ankyrin 1, erythrocytic                                         |
| Cerebellum | No  | 208457_at    | 4054481 GABRD     | 2563   | NM_000815 | gamma-aminobutyric acid (GABA) A receptor, delta                |
| Cerebellum | No  | 208798_x_at  | 3617458 GOLGIN-67 | 23015  | AF204231  | golgin-67                                                       |
| Cerebellum | Yes | 209457_at    | 3263743 DUSP5     | 1847   | U16996    | dual specificity phosphatase 5                                  |
| Cerebellum | No  | 209682_at    | 2687255 CBLB      | 868    | U26710    | Cas-Br-M (murine) ecotropic retroviral transforming sequence b  |
| Cerebellum | No  | 210150_s_at  | 3913018 LAMA5     | 3911   | BC003355  | laminin, alpha 5                                                |
| Cerebellum | No  | 210234_at    | 2950970 GRM4      | 2914   | U92457    | glutamate receptor, metabotropic 4                              |
| Cerebellum | No  | 210346_s_at  | 2889698 CLK1      | 57396  | AF212224  | CDC-like kinase 4                                               |
| Cerebellum | Yes | 210400_at    | 3770422 GRIN2C    | 2905   | L76224    | glutamate receptor, ionotropic, N-methyl D-aspartate 2C         |
| Cerebellum | No  | 210461_s_at  | 3307939 ABLIM1    | 3983   | BC002448  | actin binding LIM protein 1                                     |
| Cerebellum | No  | 211038_s_at  | 2398369 MGC12760  | 84809  | BC006312  | hypothetical protein MGC12760 /// hypothetical protein MGC12760 |
| Cerebellum | No  | 211248_s_at  | 2655790 CHR1      | 8646   | AF283325  | chordin                                                         |
| Cerebellum | No  | 211841_s_at  | 2394699 TNFRSF25  | 8718   | U94510    | tumor necrosis factor receptor superfamily, member 25           |
| Cerebellum | No  | 212179_at    | 2966253 C6orf111  | 25957  | AW157501  | chromosome 6 open reading frame 111                             |
| Cerebellum | No  | 212252_at    | 3474885 CAMKK2    | 10645  | AA181179  | calcium/calmodulin-dependent protein kinase kinase 2, beta      |
| Cerebellum | No  | 212482_at    | 2492173 FLJ13910  | 64795  | BF671894  | hypothetical protein FLJ13910                                   |
| Cerebellum | No  | 212552_at    | 7385611 HPCAL1    | 3241   | BE617588  | hippocalcin-like 1                                              |
| Cerebellum | No  | 212935_at    | 3502259 MCF2L     | 23263  | AB002360  | MCF.2 cell line derived transforming sequence-like              |
| Cerebellum | No  | 212956_at    | 2787096 KIAA0882  | 23158  | AI348094  | KIAA0882 protein                                                |
| Cerebellum | No  | 213358_at    | 3777991 KIAA0802  | 23255  | AB018345  | KIAA0802                                                        |
| Cerebellum | No  | 214295_at    | 2339067 KIAA0485  | 57235  | AW129056  | KIAA0485 protein                                                |
| Cerebellum | No  | 214682_at    | 3676421 PKD1      | 5310   | AK023376  | Hypothetical protein LOC339047                                  |

|            |     |             |                       |                 |                                                                    |
|------------|-----|-------------|-----------------------|-----------------|--------------------------------------------------------------------|
| Cerebellum | No  | 214839_at   | 3123819 LOC157627     | 157627 AF052108 | hypothetical protein LOC157627                                     |
| Cerebellum | No  | 214933_at   | 3852133 CACNA1A       | 773 AA769818    | calcium channel, voltage-dependent, P/Q type, alpha 1A subunit     |
| Cerebellum | No  | 214951_at   | 3418394 SLC26A10      | 65012 AL050358  | solute carrier family 26, member 10                                |
| Cerebellum | No  | 214978_s_at | 2375523 PPFIA4        | 8497 AK023365   | protein tyrosine phosphatase, receptor type, f polypeptide (PTPRF) |
| Cerebellum | No  | 215137_at   | 2316379 KIAA0508      | 57244 H92070    | KIAA0508 protein                                                   |
| Cerebellum | No  | 215255_at   | 3399456 KIAA1030      | 22997 AB028953  | KIAA1030 protein                                                   |
| Cerebellum | No  | 217588_at   | 3621417 CATSPER2      | 117155 AW971983 | cation channel, sperm associated 2                                 |
| Cerebellum | Yes | 218205_s_at | 3845647 MKNK2         | 2872 NM_017572  | MAP kinase interacting serine/threonine kinase 2                   |
| Cerebellum | No  | 218258_at   | 3482977 POLR1D        | 51082 NM_015972 | polymerase (RNA) I polypeptide D, 16kDa                            |
| Cerebellum | Yes | 219095_at   | 3590709 PLA2G4B       | 8681 NM_005090  | phospholipase A2, group IVB (cytosolic)                            |
| Cerebellum | No  | 219327_s_at | 3734355 GPRC5C        | 55890 NM_022036 | G protein-coupled receptor, family C, group 5, member C            |
| Cerebellum | No  | 219442_at   | 3657286 MGC3020       | 79014 NM_024048 | hypothetical protein MGC3020                                       |
| Cerebellum | Yes | 219572_at   | 3070309 CADPS2        | 93664 NM_017954 | Ca2+-dependent activator protein for secretion 2                   |
| Cerebellum | No  | 219778_at   | 3110789 ZFPM2         | 23414 NM_012082 | zinc finger protein, multitype 2                                   |
| Cerebellum | No  | 220954_s_at | 3015442 PILRB         | 22990 NM_013440 | paired immunoglobulin-like type 2 receptor beta                    |
| Cerebellum | No  | 220968_s_at | 3401381 PP1057        | 10867 NM_031285 | Ribosomal protein S27 (metalloproteinase 1)                        |
| Cerebellum | No  | 221221_s_at | 2877028 KLHL3         | 26249 NM_017415 | kelch-like 3 (Drosophila)                                          |
| Cerebellum | No  | 221656_s_at | 2322957 FLJ10521      | 55160 BC003073  | hypothetical protein FLJ10521                                      |
| Cerebellum | No  | 222494_at   | 2351369 C14orf116     | 1112 AW051527   | checkpoint suppressor 1                                            |
| Cerebellum | No  | 223350_x_at | 3367183 LIN7C         | 55327 N63709    | lin-7 homolog C (C. elegans)                                       |
| Cerebellum | No  | 223529_at   | 3805614 SYT4          | 6860 AB037763   | synaptotagmin IV                                                   |
| Cerebellum | No  | 223550_s_at | 3762753 CA10          | 56934 AF288385  | carbonic anhydrase X                                               |
| Cerebellum | Yes | 223642_at   | 3498780 ZIC2          | 7546 AF193855   | Zic family member 2 (odd-paired homolog, Drosophila)               |
| Cerebellum | No  | 224834_at   | 2887128 DC-UbP        | 92181 BF243404  | Dendritic cell-derived ubiquitin-like protein                      |
| Cerebellum | Yes | 225293_at   | 3185976 COL27A1       | 85301 AK021957  | collagen, type XXVII, alpha 1                                      |
| Cerebellum | Yes | 225473_at   | 3904594 LOC149670     | 140710 BE044516 | FLJ44670 protein                                                   |
| Cerebellum | No  | 225546_at   | 3652424 EEF2K         | 29904 W68180    | eukaryotic elongation factor-2 kinase                              |
| Cerebellum | No  | 226123_at   | 3100250 KIAA1416      | 55636 AI870918  | chromodomain helicase DNA binding protein 7                        |
| Cerebellum | No  | 226272_at   | 2325479               | --- N25986      | Full length insert cDNA clone ZD79H10                              |
| Cerebellum | No  | 226291_at   | 2595042 ALS2          | 57679 AB046783  | amyotrophic lateral sclerosis 2 (juvenile)                         |
| Cerebellum | No  | 226572_at   | 3719748 SOCS7         | 30837 AL045666  | Suppressor of cytokine signaling 7                                 |
| Cerebellum | No  | 227290_at   | 3701287               | --- AU157881    | CDNA FLJ13598 fis, clone PLACE1009921                              |
| Cerebellum | No  | 227929_at   | 3463725               | --- AU151342    | Homo sapiens, clone IMAGE:5277945, mRNA                            |
| Cerebellum | No  | 228157_at   | 2595649 ZNF207        | 7756 AI125646   | Zinc finger protein 207                                            |
| Cerebellum | ND  | 228628_at   | ---                   | 440608 AI478268 | Similar to Formin binding protein 2 (srGAP2)                       |
| Cerebellum | No  | 228793_at   | 3291682 JMJD1C        | 221037 BF002296 | jumonji domain containing 1C                                       |
| Cerebellum | No  | 229067_at   | 2355117               | 440608 BF977829 | ---                                                                |
| Cerebellum | No  | 229111_at   | 2320048 MASP2         | 10747 AA033699  | ---                                                                |
| Cerebellum | No  | 229302_at   | 2478269 MGC33926      | 130733 AA058832 | hypothetical protein MGC33926                                      |
| Cerebellum | ND  | 229406_at   | ---                   | --- AI674243    | similar to ataxin 2-binding protein 1 isoform 4                    |
| Cerebellum | No  | 229734_at   | 3399398               | 283174 BF507379 | Hypothetical protein LOC283174                                     |
| Cerebellum | No  | 230547_at   | 3322521               | --- R52825      | CDNA FLJ42249 fis, clone TKIDN2007667                              |
| Cerebellum | No  | 230902_at   | 2866137               | --- AW006096    | ---                                                                |
| Cerebellum | No  | 232010_at   | 2791894 FSTL5         | 56884 AA129444  | folliculin-like 5                                                  |
| Cerebellum | No  | 232095_at   | 2376708               | 23380 BG109134  | SLIT-ROBO Rho GTPase activating protein 2                          |
| Cerebellum | No  | 232289_at   | 3714803 FLJ14167      | 92080 BF237871  | hypothetical protein FLJ14167                                      |
| Cerebellum | No  | 232670_at   | 2431814 LOC149401     | 149401 AL137339 | Hypothetical protein LOC149401                                     |
| Cerebellum | Yes | 232796_at   | 3217361               | --- AK021556    | CDNA FLJ11494 fis, clone HEMBA1001942                              |
| Cerebellum | No  | 233139_at   | 3647106               | 54715 AF131795  | PRbBP-39                                                           |
| Cerebellum | No  | 234314_at   | 3900091 KIAA1272      | 57186 AB033098  | KIAA1272 protein                                                   |
| Cerebellum | No  | 235085_at   | 3123409 DKFZp761P0423 | 157285 BF739767 | hypothetical protein DKFZp761P0423                                 |
| Cerebellum | No  | 235094_at   | 2614798               | 7171 AI972661   | Tropomyosin 4                                                      |
| Cerebellum | Yes | 235205_at   | 3110999 OXR1          | 55074 BF109660  | similar to solute carrier family 16, member 14                     |
| Cerebellum | No  | 235305_s_at | 2413032 FLJ10948      | 55268 AI903313  | Hypothetical protein FLJ10948                                      |
| Cerebellum | No  | 235468_at   | 3772831               | --- AA531287    | similar to ataxin 2-binding protein 1 isoform 4                    |
| Cerebellum | No  | 235803_at   | 3716767               | 51379 AA843122  | Cytokine receptor-like factor 3                                    |
| Cerebellum | ND  | 236856_x_at | ---                   | --- AI740460    | CDNA FLJ34374 fis, clone FEBRA2017502                              |
| Cerebellum | ND  | 236949_at   | ---                   | --- AI079543    | LOC440283                                                          |
| Cerebellum | No  | 237591_at   | 3433466 FLJ42957      | 400077 AI821565 | FLJ42957 protein                                                   |
| Cerebellum | ND  | 238853_at   | ---                   | --- AI436813    | Glioma amplified sequence 64                                       |

|            |    |           |     |         |     |                 |                                                                    |
|------------|----|-----------|-----|---------|-----|-----------------|--------------------------------------------------------------------|
| Cerebellum | No | 238883_at |     | 3473083 |     | 23389 AW975051  | Thyroid hormone receptor associated protein 2                      |
| Cerebellum | ND | 239297_at | --- |         | --- | BE932011        | Transcribed locus, weakly similar to hypothetical protein MGC45438 |
| Cerebellum | ND | 239907_at | --- |         | --- | BF508839        | ---                                                                |
| Cerebellum | No | 240690_at |     | 3123409 |     | 157285 AI494291 | Hypothetical protein DKFZp761P0423                                 |
| Cerebellum | No | 242052_at |     | 3410445 |     | 636 AW979272    | Bicaudal D homolog 1 (Drosophila)                                  |
| Cerebellum | No | 242191_at |     | 2357217 |     | 55672 AI701905  | hypothetical protein LOC200030 /// hypothetical LOC400781          |
| Cerebellum | No | 242471_at |     | 2431814 | --- | AI916641        | Transcribed locus                                                  |
| Cerebellum | No | 242558_at |     | 2618940 |     | 1499 AW362945   | Catenin (cadherin-associated protein), beta 1, 88kDa               |

**Table S12. Comparison with extant mouse cortex microarray data**

| 12.5 mouse cortex enrichment (Kudo et al., 2006) | GenBank Accession | Gene               | UniGene   | Mouse EntrezGeneID | MoExTCID | HuExTCID Best Match | Consistent with late mid-fetal human NCTX? |
|--------------------------------------------------|-------------------|--------------------|-----------|--------------------|----------|---------------------|--------------------------------------------|
| Anterior ctx                                     | AA073913          | Amn                | Mm.197639 | 93835              | 6798197  | 3553389             | No                                         |
| Anterior ctx                                     | W75669            | Anapc2             | Mm.291624 | 99152              | 6875703  | 3230894             | No                                         |
| Anterior ctx                                     | AA120679          | Arl4c              | Mm.27968  | 320982             | 6760518  | 2604390             | No                                         |
| Anterior ctx                                     | W96830            | Brp16              | Mm.133202 | 59053              | 6831654  | 3120140             | No                                         |
| Anterior ctx                                     | W36837            | Cacnb1             | Mm.41252  | 12295              | 6791233  | 3755580             | No                                         |
| Anterior ctx                                     | W65230            | Cldn13             | Mm.86652  | 57255              | 6942396  | ---                 | ND*                                        |
| Anterior ctx                                     | AA120697          | Clec1b             | Mm.30700  | 56760              | 6950147  | 3443936             | No                                         |
| Anterior ctx                                     | AA108438          | Cml4               | Mm.154782 | 68396              | 6955165  | ---                 | ND                                         |
| Anterior ctx                                     | W63987            | Cnp                | Mm.462581 | 12799              | 6784205  | 3721548             | No                                         |
| Anterior ctx                                     | Al594926          | Dcpp2              | Mm.436677 | 630537             | ---      | ---                 | ND                                         |
| Anterior ctx                                     | AA008734          | Ddx27              | Mm.295031 | 228889             | 6883273  | 3888217             | No                                         |
| Anterior ctx                                     | W45825            | Dyrk2              | Mm.458174 | 69181              | 6777421  | 3420854             | No, opposite gradient                      |
| Anterior ctx                                     | AA008687          | Ecgf1              | Mm.287977 | 72962              | ---      | ---                 | ND                                         |
| Anterior ctx                                     | AA060723          | EtfA               | Mm.290853 | 110842             | 6995817  | 3633794             | No                                         |
| Anterior ctx                                     | Al385754          | Fabp7              | Mm.3644   | 12140              | 6768075  | 2923928             | No                                         |
| Anterior ctx                                     | AA031219          | Fbxl17             | Mm.329156 | 50758              | 6856511  | 2870113             | No, opposite gradient                      |
| Anterior ctx                                     | AA023645          | Fhl2               | Mm.6799   | 14200              | 6758261  | 2568687             | No                                         |
| Anterior ctx                                     | AA002314          | Fit3l              | Mm.1658   | 14256              | 6966939  | ---                 | ND                                         |
| Anterior ctx                                     | AA060844          | Fxyd6              | Mm.208287 | 59095              | 6988722  | 3393479             | No                                         |
| Anterior ctx                                     | AA175441          | Ggta1              | Mm.281124 | 14594              | 6886045  | 3223967             | No                                         |
| Anterior ctx                                     | AA466087          | H2afz              | Mm.117541 | 51788              | 6901695  | 2779486             | No                                         |
| Anterior ctx                                     | W10072            | Igf1               | Mm.268521 | 16000              | 6769596  | 3468345             | No                                         |
| Anterior ctx                                     | AA175538          | Il7r               | Mm.389    | 16197              | 6833937  | 2806468             | No                                         |
| Anterior ctx                                     | AA403846          | Kitl               | Mm.45124  | 17311              | 6770201  | ---                 | ND                                         |
| Anterior ctx                                     | W97446            | Klf1               | Mm.4847   | 16596              | 6977772  | 3851840             | No                                         |
| Anterior ctx                                     | W66749            | Letmd1             | Mm.275272 | 68614              | 6833243  | 3414776             | No                                         |
| Anterior ctx                                     | AA231293          | Meox2              | Mm.341398 | 17286              | 6794550  | 3039485             | No                                         |
| Anterior ctx                                     | AA098361          | Mfhas1             | Mm.103246 | 52065              | 6975392  | 3123541             | No                                         |
| Anterior ctx                                     | AA033466          | Mpo                | Mm.4668   | 17523              | 6783338  | 3764245             | No                                         |
| Anterior ctx                                     | AA109944          | Myo7b              | Mm.440013 | 17922              | 6864370  | 2504645             | No                                         |
| Anterior ctx                                     | AA473269          | Ndrp1              | Mm.30837  | 17988              | 6836358  | 3154317             | No                                         |
| Anterior ctx                                     | W85646            | Nek9               | Mm.29071  | 217718             | 6802386  | 3572278             | No                                         |
| Anterior ctx                                     | Al425728          | Nupl1              | Mm.258051 | 71844              | 6825137  | 2350145             | No                                         |
| Anterior ctx                                     | AA119236          | Nvl                | Mm.263464 | 67459              | 6764657  | 2458017             | No                                         |
| Anterior ctx                                     | W14332            | Pcbd1              | Mm.39473  | 13180              | 6768198  | 3293537             | Yes                                        |
| Anterior ctx                                     | W98241            | Pcsk5              | Mm.3401   | 18552              | 6871879  | 3175274             | No                                         |
| Anterior ctx                                     | AA062140          | Pitx3              | Mm.6255   | 18742              | 6873396  | 3304265             | No                                         |
| Anterior ctx                                     | AA031057          | Ppp2r2b            | Mm.26134  | 72930              | 6865041  | 2880051             | No                                         |
| Anterior ctx                                     | Al429829          | Rab13              | Mm.29355  | 68328              | 6899326  | 2436401             | No                                         |
| Anterior ctx                                     | AA275118          | Rap2c              | Mm.43152  | 72065              | 7016797  | 4022032             | No                                         |
| Anterior ctx                                     | CA748280          | Rbp1               | Mm.279741 | 19659              | 6991714  | 2697863             | Yes                                        |
| Anterior ctx                                     | W80210            | Rbpms              | Mm.323997 | 19663              | 6981604  | 3092415             | No                                         |
| Anterior ctx                                     | AA184614          | Rhof               | Mm.253876 | 23912              | 6941780  | 3475324             | No                                         |
| Anterior ctx                                     | AA000347          | Sec24c             | Mm.173119 | 218811             | 6817365  | ---                 | ND                                         |
| Anterior ctx                                     | AA268953          | Sfrp1              | Mm.281691 | 20377              | 6974663  | 3132782             | Yes                                        |
| Anterior ctx                                     | AA175259          | Sh3kbp1            | Mm.286495 | 58194              | ---      | ---                 | ND                                         |
| Anterior ctx                                     | AA413194          | Slc25a13           | Mm.24513  | 50799              | 6951440  | 3062193             | Yes                                        |
| Anterior ctx                                     | Al467559          | Sliit3             | Mm.202457 | 20564              | 6779995  | 2886174             | Yes                                        |
| Anterior ctx                                     | AA000223          | Smoc1              | Mm.273295 | 64075              | 6796430  | 3542275             | Yes                                        |
| Anterior ctx                                     | AA200737          | Snapap             | Mm.331182 | 20615              | 6823263  | ---                 | ND                                         |
| Anterior ctx                                     | W34018            | Spnb1              | Mm.32881  | 20741              | 6801902  | ---                 | ND                                         |
| Anterior ctx                                     | AA038788          | Stc1               | Mm.20911  | 20855              | 6820013  | 3128046             | No, opposite gradient                      |
| Anterior ctx                                     | AA270232          | Tal1               | Mm.439685 | 21349              | 6916487  | 2411198             | No                                         |
| Anterior ctx                                     | AA547208          | Tcl1               | Mm.18154  | 21432              | 6803335  | ---                 | ND                                         |
| Anterior ctx                                     | W59265            | Trio               | Mm.211229 | 223435             | 6834566  | 2802398             | No                                         |
| Anterior ctx                                     | AA522127          | Uqcrc2             | Mm.334206 | 67003              | 6963946  | 3652218             | No                                         |
| Anterior ctx                                     | W49208            | Usp29              | Mm.40752  | 57775              | 6973353  | 3843027             | No                                         |
| Anterior ctx                                     | AA061458          | Usp52              | Mm.244183 | 103135             | 6771643  | ---                 | ND                                         |
| Anterior ctx                                     | AA002636          | Zfp560             | Mm.379669 | 434377             | 6993691  | ---                 | ND                                         |
| Anterior ctx                                     | AA003367          | Wdr33              | Mm.277705 | 74320              | 6859781  | 2575054             | No                                         |
| Anterior ctx                                     | AA163996          | 3110048L19Rik      | Mm.311219 | 73233              | 6854152  | ---                 | ND                                         |
| Anterior ctx                                     | AA145137          | 170009I09Rik       | Mm.426384 | 76624              | 6809668  | ---                 | ND                                         |
| Anterior ctx                                     | AA144046          | Ckap5              | Mm.168478 | 75786              | 6879059  | 3371719             | No                                         |
| Anterior ctx                                     | Al413838          | OTTMUSG00000015915 | Mm.330682 | 433492             | ---      | ---                 | ND                                         |
| Anterior ctx                                     | AA170335          | C030010B13Rik      | Mm.260590 | 77310              | 6893573  | ---                 | ND                                         |
| Anterior ctx                                     | AA204360          | Plekha1            | Mm.323554 | 101476             | 6964522  | 3268274             | No                                         |
| Anterior ctx                                     | BX527908          | Unc84b             | Mm.202715 | 223697             | 6837127  | 3960827             | No                                         |
| Anterior ctx                                     | AA002786          | Gemin8             | Mm.209490 | 237221             | 6816023  | 4000267             | No                                         |
| Anterior ctx                                     | W59215            | Myl6b              | Mm.291688 | 216459             | 6771664  | 3417435             | No                                         |
| Anterior ctx                                     | AK053778          | Isg20l2            | Mm.45744  | 229504             | 6899033  | 2438482             | No                                         |
| Anterior ctx                                     | AA217113          | EG668139           | Mm.300542 | 668139             | 6970173  | ---                 | ND                                         |
| Anterior ctx                                     | AA050124          | Apc2               | Mm.57247  | 23805              | 6769209  | 3815888             | No                                         |
| Anterior ctx                                     | W70958            | Jhdm1d             | Mm.391919 | 338523             | 6952930  | 3075984             | No                                         |
| Posterior ctx                                    | AA245324          | Aip                | Mm.10433  | 11632              | 6870975  | 3337137             | No                                         |
| Posterior ctx                                    | AA064247          | Coro7              | Mm.325512 | 78885              | 6843653  | 3678083             | Yes                                        |
| Posterior ctx                                    | AA008001          | Ctsb               | Mm.236553 | 13030              | 6819694  | 3124537             | No                                         |
| Posterior ctx                                    | AA073904          | Dkk3               | Mm.55143  | 50781              | 6970496  | 3363266             | No                                         |
| Posterior ctx                                    | AA153223          | Dusp11             | Mm.24007  | 72102              | 6955175  | 2559649             | No                                         |
| Posterior ctx                                    | AA544895          | Farp1              | Mm.223980 | 223254             | 6822201  | 3497881             | No                                         |

|               |          |               |           |        |         |         |    |
|---------------|----------|---------------|-----------|--------|---------|---------|----|
| Posterior ctx | AA047966 | Fhl1          | Mm.3126   | 14199  | 7011394 | 3992406 | No |
| Posterior ctx | AA030294 | Fzd1          | Mm.246003 | 14362  | 6935966 | 3012213 | No |
| Posterior ctx | AA255078 | Galk1         | Mm.2820   | 14635  | 6792485 | 3770923 | No |
| Posterior ctx | AA048560 | Gart          | Mm.4505   | 14450  | 6843192 | 3929721 | No |
| Posterior ctx | AA289992 | Ifitm2        | Mm.379266 | 80876  | 6972165 | ---     | ND |
| Posterior ctx | AA261160 | Mcam          | Mm.275003 | 84004  | 6988609 | 3394264 | No |
| Posterior ctx | W55827   | Nfix          | Mm.9394   | 18032  | 6983873 | 3822122 | No |
| Posterior ctx | W98998   | Notch1        | Mm.290610 | 18128  | 6885488 | 3230141 | No |
| Posterior ctx | BX513775 | Pfas          | Mm.340288 | 237823 | 6789242 | 3709540 | No |
| Posterior ctx | AA253750 | Rbm9          | Mm.202774 | 93686  | 6836888 | 3959203 | No |
| Posterior ctx | AA518455 | Tcf4          | Mm.4269   | 21413  | ---     | 3264621 | No |
| Posterior ctx | W17647   | Ttr           | Mm.2108   | 22139  | 6859290 | 3783565 | No |
| Posterior ctx | W37018   | Zmym3         | Mm.23458  | 56364  | 7018546 | 4011889 | No |
| Posterior ctx | AA041916 | E130016E03Rik | Mm.249437 | 623474 | 6911719 | ---     | ND |
| Posterior ctx | AA051406 | Mepce         | Mm.61193  | 231803 | 6942575 | 3015553 | No |
| Posterior ctx | BX522937 | 2900001G08Rik | Mm.102196 | 76950  | 6849764 | ---     | ND |
| Posterior ctx | AA273386 | Zdhhc20       | Mm.29044  | 75965  | 6824978 | 3492958 | No |
| Posterior ctx | AA270527 | Nfix          | Mm.426936 | 18029  | 6775465 | 3816919 | No |
| Posterior ctx | AA231557 | Asah3l        | Mm.458684 | 230379 | 6915138 | 2596315 | No |

| P0 mouse cortex enrichment (Leamey Gene Symbol et al., 2007) |                |                                            |                                                                 | Confirmation | HuExTCID Best Match | Consistent with late mid-fetal human NCTX? |
|--------------------------------------------------------------|----------------|--------------------------------------------|-----------------------------------------------------------------|--------------|---------------------|--------------------------------------------|
| visual ctx                                                   | Ten_m3         | Teneurin 3 (Odz3)                          | PCR, Li et al. (2006)                                           | 2753440      | No                  |                                            |
| visual ctx                                                   | Ten_m2         | Teneurin 2 (Odz2)                          | PCR, Li et al. (2006)                                           | 2839227      | Yes                 |                                            |
| visual ctx                                                   | Nrp1           | Neuropilin 1                               | PCR                                                             | 3284302      | No                  |                                            |
| visual ctx                                                   | Crym           | Mu-crystallin                              | PCR                                                             | 3684039      | No                  |                                            |
| visual ctx                                                   | Tshz3          | T-shirt 3                                  | PCR                                                             | 3858285      | Yes                 |                                            |
| visual ctx                                                   | Nr2f1          | COUP-Tf1                                   | Zhou et al. (2001)                                              | 2820394      | Yes                 |                                            |
| visual ctx                                                   | NeuroD1        | Neurogenic differentiation 1               |                                                                 | 2590491      | No                  |                                            |
| visual ctx                                                   | Ten_m4         | Teneurin 4 (Odz4)                          | Li et al. (2006)                                                | 3383394      | Yes                 |                                            |
| visual ctx                                                   | Dkk3           | Dickkopf 3                                 | PCR                                                             | 3363266      | No                  |                                            |
| somatosensory ctx                                            | Efna5          | EphrinA5                                   | Fukuchi-Shimogori and Grove (2001); Miller et al. (2006)        | 2869880      | Yes                 |                                            |
| somatosensory ctx                                            | Tbr1           | T brain 1                                  | Bulfone et al. (1995); Miyashita-Lin et al. (1999)              | 2512752      | Yes                 |                                            |
| somatosensory ctx                                            | RORb/Nr1f2     | RAR orphan receptor beta                   | Miyashita-Lin et al. (1999); Fukuchi-Shimogori and Grove (2001) | 3174967      | No                  |                                            |
| visual ctx                                                   | Lmo4           | Lim only domain 4                          | PCR, Bulchand et al. (2003)                                     | 2345286      | Yes                 |                                            |
| visual ctx                                                   | Flrt3          | Fibronectin leucine rich 3                 | PCR                                                             | 3898355      | No                  |                                            |
| visual ctx                                                   | Igsf4a (Cadm1) | Immunoglobulin superfamily 4/syncam        | PCR                                                             | 3392332      | No                  |                                            |
| visual ctx                                                   | Al838057 (Met) | met proto-oncogene                         | PCR                                                             | 3020343      | Yes                 |                                            |
| somatosensory ctx                                            | Bcl6           | B-cell leukemia 6                          | PCR                                                             | 2709778      | Yes                 |                                            |
| somatosensory ctx                                            | Dusp6          | Dual specificity phosphatase 6             | PCR                                                             | 3464860      | Yes                 |                                            |
| somatosensory ctx                                            | TGFbR1         | Transforming growth factor beta receptor 1 | PCR                                                             | 3181728      | No                  |                                            |
| somatosensory ctx                                            | PTPrO          | Protein tyrosine phosphatase receptor O    | PCR                                                             | 3406329      | Yes                 |                                            |
| somatosensory ctx                                            | NPY            | Neuropeptide Y                             | PCR                                                             | 2993124      | No                  |                                            |
| somatosensory ctx                                            | Klhl29         | Kelch repeat and BTB domain 9              | PCR                                                             | 2472651      | Yes                 |                                            |
| somatosensory ctx                                            | Luzp2          | Leucine zipper protein 2                   | PCR                                                             | 3324162      | Yes                 |                                            |
| somatosensory ctx                                            | Lmo3           | Lim only domain 3                          | PCR, Bulchand et al. (2003)                                     | 3446137      | Yes                 |                                            |
| somatosensory ctx                                            | Usp6           | Ubiquitin specific phosphatase 6           | PCR                                                             | 3707498      | Yes                 |                                            |

\*ND: Equivalent probesets not present or not analyzed, due to contraindications such as discontinued gene records or lack of homology.

**Table S13a. Intra-NCTX DEX genes with associated haCNSs**

| Exon Array Transcript Cluster ID | Official Gene Symbol | Entrez GeneID | RefSeq Accession | NCTX DEX p-value | haCNS    | chr   | start     | stop      | caCNS? |
|----------------------------------|----------------------|---------------|------------------|------------------|----------|-------|-----------|-----------|--------|
| 3497340                          | HS6ST3               | 266722        | NM_153456        | 8.1E-20          | haCNS164 | chr13 | 96072144  | 96072321  | Yes    |
| 2709778                          | BCL6                 | 604           | NM_001706        | 5.0E-17          | haCNS526 | chr3  | 189110780 | 189111074 | No     |
| 3305801                          | SORCS1               | 114815        | NM_001013031     | 2.7E-15          | haCNS5   | chr10 | 108799372 | 108799584 | No     |
| 3618333                          | MEIS2                | 4212          | NM_002399        | 7.5E-15          | haCNS486 | chr15 | 34964313  | 34964458  | No     |
| 3251068                          | CDH23                | 64072         | NM_052836        | 1.6E-13          | haCNS224 | chr10 | 73079027  | 73079150  | No     |
| 3136888                          | TOX                  | 9760          | NM_014729        | 2.2E-13          | haCNS272 | chr8  | 60588695  | 60588989  | Yes    |
| 2722823                          | PCDH7                | 5099          | NM_032457        | 3.6E-13          | haCNS256 | chr4  | 30251108  | 30251384  | Yes    |
| 3319073                          | SYT9                 | 143425        | NM_175733        | 3.7E-13          | haCNS540 | chr11 | 7392512   | 7392848   | No     |
| 2645079                          | CLSTN2               | 64084         | NM_022131        | 3.8E-13          | haCNS489 | chr3  | 141585826 | 141585979 | Yes    |
| 2632778                          | EPHA6                | 285220        | NM_001080448     | 6.9E-13          | haCNS838 | chr3  | 98795778  | 98796002  | No     |
| 2820394                          | NR2F1                | 7025          | NM_005654        | 6.9E-13          | haCNS151 | chr5  | 92242065  | 92242207  | Yes    |
| 2970607                          | HS3ST5               | 222537        | NM_153612        | 1.4E-12          | haCNS832 | chr6  | 115043272 | 115043392 | No     |
| 2683763                          | ROBO1                | 6091          | NM_002941        | 4.0E-12          | haCNS112 | chr3  | 80297644  | 80297883  | Yes    |
| 3222534                          | ASTN2                | 23245         | NM_198188        | 1.1E-11          | haCNS242 | chr9  | 118236797 | 118237001 | Yes    |
| 2805078                          | CDH6                 | 1004          | NM_004932        | 1.9E-11          | haCNS753 | chr5  | 30891924  | 30892049  | Yes    |
| 3029900                          | CNTNAP2              | 26047         | NM_014141        | 3.0E-11          | haCNS97  | chr7  | 145618470 | 145618578 | Yes    |
| 3262715                          | SORCS3               | 22986         | NM_014978        | 3.1E-11          | haCNS59  | chr10 | 107090354 | 107090655 | Yes    |
| 2825907                          | PRR16                | 51334         | NM_016644        | 8.3E-11          | haCNS302 | chr5  | 119523634 | 119523860 | No     |
| 3610110                          | NR2F2                | 7026          | NM_021005        | 8.8E-11          | haCNS32  | chr15 | 94753758  | 94754013  | Yes    |
| 3197014                          | GLIS3                | 169792        | NM_001042413     | 1.6E-10          | haCNS150 | chr9  | 3877140   | 3877653   | Yes    |
| 3163982                          | ADAMTSL1             | 92949         | NM_052866        | 2.3E-10          | haCNS128 | chr9  | 18438142  | 18438380  | No     |
| 2560881                          | LRRTM4               | 80059         | NM_024993        | 4.8E-10          | haCNS800 | chr2  | 77682834  | 77683132  | Yes    |
| 2424524                          | DPYD                 | 1806          | NM_000110        | 6.3E-10          | haCNS537 | chr1  | 98395817  | 98395988  | No     |
| 3446137                          | LMO3                 | 55885         | NM_018640        | 1.4E-09          | haCNS121 | chr12 | 16596252  | 16596435  | Yes    |
| 3884324                          | CTNBL1               | 56259         | NM_030877        | 1.6E-09          | haCNS17  | chr20 | 35912909  | 35913087  | No     |
| 3326826                          | FJX1                 | 24147         | NM_014344        | 1.8E-09          | haCNS503 | chr11 | 35601290  | 35601570  | No     |
| 3463056                          | CSRP2                | 1466          | NM_001321        | 2.1E-09          | haCNS111 | chr12 | 75867499  | 75867642  | No     |
| 2998192                          | POU6F2               | 11281         | NM_007252        | 2.4E-09          | haCNS226 | chr7  | 38984675  | 38985187  | No     |
| 4018080                          | CHRD1                | 91851         | NM_145234        | 3.0E-09          | haCNS275 | chrX  | 109707257 | 109707663 | No     |
| 2607757                          | CNTN6                | 27255         | NM_014461        | 5.7E-09          | haCNS394 | chr3  | 1686232   | 1686505   | Yes    |
| 3623270                          | SHC4                 | 399694        | NM_203349        | 8.2E-09          | haCNS696 | chr15 | 46936209  | 46936204  | No     |
| 3558418                          | STXBP6               | 29091         | NM_014178        | 1.2E-08          | haCNS225 | chr14 | 25168881  | 25169062  | No     |
| 3560403                          | EGLN3                | 112399        | NM_022073        | 1.7E-08          | haCNS780 | chr14 | 33722506  | 33722733  | No     |
| 2944491                          | MBOAT1               | 154141        | NM_001080480     | 1.9E-08          | haCNS549 | chr6  | 20084408  | 20085329  | No     |
| 3524570                          | EFNB2                | 1948          | NM_004093        | 1.9E-08          | haCNS763 | chr13 | 105744999 | 105745127 | Yes    |
| 3788560                          | DCC                  | 1630          | NM_005215        | 3.9E-08          | haCNS218 | chr18 | 47660078  | 47660381  | Yes    |
| 2524301                          | NRP2                 | 8828          | NM_003872        | 4.9E-08          | haCNS265 | chr2  | 206245096 | 206245372 | No     |
| 3928211                          | GRIK1                | 2897          | NM_175611        | 5.5E-08          | haCNS814 | chr21 | 29852591  | 29852811  | Yes    |
| 3515965                          | DIAPH3               | 81624         | NM_001042517     | 6.2E-08          | haCNS494 | chr13 | 58982919  | 58983395  | Yes    |
| 3653266                          | CACNG3               | 10368         | NM_006539        | 9.7E-08          | haCNS911 | chr16 | 24352475  | 24352653  | No     |
| 3464860                          | DUSP6                | 1848          | NM_022652        | 1.3E-07          | haCNS240 | chr12 | 88267696  | 88268072  | Yes    |
| 3516639                          | PCDH9                | 5101          | NM_203487        | 1.5E-07          | haCNS406 | chr13 | 64945406  | 64945619  | Yes    |
| 3159946                          | SMARCA2              | 6595          | NM_139045        | 1.5E-07          | haCNS521 | chr9  | 2040744   | 2041141   | Yes    |
| 3515109                          | PCDH8                | 5100          | NM_002590        | 2.8E-07          | haCNS239 | chr13 | 52397999  | 52398335  | No     |
| 3671202                          | CDH13                | 1012          | NM_001257        | 3.1E-07          | haCNS900 | chr16 | 81400604  | 81401062  | Yes    |
| 2343823                          | LPHN2                | 23266         | NM_012302        | 3.4E-07          | haCNS483 | chr1  | 81056287  | 81056490  | Yes    |
| 3682445                          | XYLT1                | 64131         | NM_022166        | 3.6E-07          | haCNS345 | chr16 | 17760829  | 17761047  | No     |
| 2854445                          | DAB2                 | 1601          | NM_001343        | 3.7E-07          | haCNS247 | chr5  | 39563011  | 39563189  | No     |
| 3392332                          | CADM1                | 23705         | NM_014333        | 4.0E-07          | haCNS249 | chr11 | 114591944 | 114592143 | Yes    |
| 2736060                          | GRID2                | 2895          | NM_001510        | 4.1E-07          | haCNS447 | chr4  | 94325526  | 94325665  | Yes    |
| 3915936                          | NCAM2                | 4685          | NM_004540        | 4.7E-07          | haCNS440 | chr21 | 20868551  | 20868769  | Yes    |
| 2448710                          | FAM5C                | 339479        | NM_199051        | 4.9E-07          | haCNS608 | chr1  | 186868826 | 186869039 | Yes    |
| 2684187                          | GBE1                 | 2632          | NM_000158        | 5.8E-07          | haCNS270 | chr3  | 82925442  | 82925787  | Yes    |
| 2607923                          | CNTN4                | 152330        | NM_175607        | 6.6E-07          | haCNS451 | chr3  | 2112725   | 2113157   | Yes    |
| 3907711                          | CDH27                | 64405         | NM_021248        | 6.8E-07          | haCNS962 | chr20 | 44287216  | 44287525  | No     |
| 2743800                          | PCDH10               | 57575         | NM_032961        | 7.2E-07          | haCNS565 | chr4  | 134658662 | 134659043 | Yes    |
| 3352618                          | GRIK4                | 2900          | NM_014619        | 7.5E-07          | haCNS74  | chr11 | 120145971 | 120146354 | No     |
| 3401325                          | TSPAN9               | 10867         | NM_006675        | 7.6E-07          | haCNS105 | chr12 | 3117135   | 3117301   | Yes    |
| 2873897                          | MARCH3               | 115123        | NM_178450        | 7.9E-07          | haCNS341 | chr5  | 126266047 | 126266370 | Yes    |
| 2554975                          | BCL11A               | 53335         | NM_138559        | 7.9E-07          | haCNS101 | chr2  | 59740616  | 59740976  | Yes    |
| 3093526                          | UNC5D                | 137970        | NM_080872        | 8.8E-07          | haCNS793 | chr8  | 35643432  | 35643696  | Yes    |
| 2600689                          | EPHA4                | 2043          | NM_004438        | 1.0E-06          | haCNS201 | chr2  | 221757000 | 221757162 | Yes    |
| 4051849                          | PTCH1                | 5727          | NM_001083602     | 1.6E-06          | haCNS232 | chr9  | 97461843  | 97462028  | No     |
| 2338719                          | NFIA                 | 4774          | NM_005595        | 1.7E-06          | haCNS748 | chr1  | 61483496  | 61483696  | Yes    |
| 3762753                          | CA10                 | 56934         | NM_001082534     | 2.0E-06          | haCNS299 | chr17 | 47184433  | 47184693  | Yes    |
| 2378019                          | CAMK1G               | 57172         | NM_020439        | 2.3E-06          | haCNS946 | chr1  | 207801418 | 207801746 | Yes    |



|         |          |        |              |         |          |       |           |           |     |
|---------|----------|--------|--------------|---------|----------|-------|-----------|-----------|-----|
| 3019793 | FOXP2    | 93986  | NM_148899    | 2.4E-06 | haCNS169 | chr7  | 114199879 | 114200201 | Yes |
| 3889833 | DOK5     | 55816  | NM_018431    | 2.8E-06 | haCNS695 | chr20 | 52926808  | 52927102  | Yes |
| 3495968 | SLITRK5  | 26050  | NM_015567    | 2.8E-06 | haCNS616 | chr13 | 86603709  | 86603919  | Yes |
| 3399004 | OPCML    | 4978   | NM_001012393 | 3.1E-06 | haCNS63  | chr11 | 132314871 | 132315188 | Yes |
| 2503929 | CNTNAP5  | 129684 | NM_130773    | 3.7E-06 | haCNS815 | chr2  | 126009228 | 126009329 | No  |
| 3125116 | DLC1     | 10395  | NM_006094    | 4.4E-06 | haCNS701 | chr8  | 13070339  | 13070464  | No  |
| 3397003 | KIRREL3  | 84623  | NM_032531    | 5.6E-06 | haCNS15  | chr11 | 126518672 | 126518865 | No  |
| 2869880 | EFNA5    | 1946   | NM_001962    | 6.1E-06 | haCNS704 | chr5  | 106842100 | 106842248 | Yes |
| 2387126 | RYR2     | 6262   | NM_001035    | 6.6E-06 | haCNS383 | chr1  | 235274374 | 235274542 | No  |
| 2576988 | LYPD1    | 116372 | NM_001077427 | 7.0E-06 | haCNS95  | chr2  | 133063363 | 133063559 | No  |
| 3155489 | LOC51059 | 51059  | NM_015912    | 8.1E-06 | haCNS322 | chr8  | 138620593 | 138620688 | No  |
| 2628482 | FAM19A1  | 407738 | NM_213609    | 8.3E-06 | haCNS404 | chr3  | 68030843  | 68031386  | Yes |
| 2624639 | CACNA2D3 | 55799  | NM_018398    | 8.7E-06 | haCNS516 | chr3  | 54809508  | 54809792  | No  |
| 2973376 | PTPRK    | 5796   | NM_002844    | 9.4E-06 | haCNS600 | chr6  | 128550930 | 128551035 | No  |
| 2918982 | GRIK2    | 2898   | NM_021956    | 1.0E-05 | haCNS584 | chr6  | 101850869 | 101851143 | No  |
| 2657831 | IL1RAP   | 3556   | NM_002182    | 1.1E-05 | haCNS539 | chr3  | 191745709 | 191746021 | No  |
| 3797295 | L3MBTL4  | 91133  | NM_173464    | 1.3E-05 | haCNS786 | chr18 | 5954449   | 5954661   | No  |
| 3907072 | RIMS4    | 140730 | NM_182970    | 1.6E-05 | haCNS333 | chr20 | 42893409  | 42893628  | No  |
| 2626802 | PTPRG    | 5793   | NM_002841    | 1.9E-05 | haCNS876 | chr3  | 61420464  | 61420687  | Yes |
| 2601995 | IRS1     | 3667   | NM_005544    | 2.2E-05 | haCNS856 | chr2  | 227070286 | 227070455 | No  |
| 2690715 | IGSF11   | 152404 | NM_152538    | 2.5E-05 | haCNS722 | chr3  | 118959977 | 118960358 | Yes |
| 2851511 | CDH9     | 1007   | NM_016279    | 2.7E-05 | haCNS513 | chr5  | 28348357  | 28348627  | Yes |
| 3356539 | HNT      | 50863  | NM_016522    | 2.7E-05 | haCNS58  | chr11 | 131357793 | 131357915 | Yes |
| 3733590 | SOX9     | 6662   | NM_000346    | 2.8E-05 | haCNS346 | chr17 | 67071580  | 67071793  | Yes |
| 2608469 | ITPR1    | 3708   | NM_001099952 | 2.9E-05 | haCNS611 | chr3  | 4765328   | 4765561   | No  |
| 3397589 | ETS1     | 2113   | NM_005238    | 3.3E-05 | haCNS335 | chr11 | 127851834 | 127852167 | No  |
| 3444958 | DUSP16   | 80824  | NM_030640    | 3.4E-05 | haCNS20  | chr12 | 12627193  | 12627506  | No  |
| 3308241 | GFRA1    | 2674   | NM_145793    | 3.8E-05 | haCNS558 | chr10 | 117765211 | 117765317 | No  |
| 3248661 | ZNF365   | 22891  | NM_199451    | 4.1E-05 | haCNS154 | chr10 | 63812581  | 63812727  | Yes |
| 2470165 | TRIB2    | 28951  | NM_021643    | 4.4E-05 | haCNS468 | chr2  | 12455705  | 12455889  | No  |
| 3694215 | CDH8     | 1006   | NM_001796    | 5.0E-05 | haCNS72  | chr16 | 61919767  | 61919944  | Yes |
| 3518086 | TBC1D4   | 9882   | NM_014832    | 6.0E-05 | haCNS437 | chr13 | 74309835  | 74309973  | No  |
| 2763550 | PPARGC1A | 10891  | NM_013261    | 6.2E-05 | haCNS68  | chr4  | 23484769  | 23485247  | Yes |
| 2918388 | POU3F2   | 5454   | NM_005604    | 6.2E-05 | haCNS145 | chr6  | 99052913  | 99053392  | Yes |
| 3629948 | MEGF11   | 84465  | NM_032445    | 6.8E-05 | haCNS847 | chr15 | 64109344  | 64109537  | No  |
| 3519309 | SPRY2    | 10253  | NM_005842    | 6.9E-05 | haCNS313 | chr13 | 81444472  | 81444787  | Yes |
| 3174816 | ANXA1    | 301    | NM_000700    | 6.9E-05 | haCNS357 | chr9  | 75045823  | 75046044  | No  |
| 3394488 | PVRL1    | 5818   | NM_203286    | 8.0E-05 | haCNS467 | chr11 | 119052625 | 119052773 | No  |
| 2920085 | FLJ10159 | 55084  | NM_018013    | 8.3E-05 | haCNS140 | chr6  | 108071093 | 108071302 | No  |
| 2865390 | EDIL3    | 10085  | NM_005711    | 9.0E-05 | haCNS138 | chr5  | 84281024  | 84281226  | Yes |
| 3542275 | SMOC1    | 64093  | NM_022137    | 9.3E-05 | haCNS461 | chr14 | 69389036  | 69389264  | No  |
| 3447348 | SOX5     | 6660   | NM_006940    | 9.5E-05 | haCNS610 | chr12 | 24060581  | 24060839  | No  |
| 2689516 | ZBTB20   | 26137  | NM_015642    | 9.7E-05 | haCNS765 | chr3  | 115755628 | 115755992 | Yes |
| 4047493 | PCDH18   | 54510  | NM_019035    | 0.0001  | haCNS691 | chr4  | 138301944 | 138302103 | Yes |
| 2579572 | ZEB2     | 9839   | NM_014795    | 0.0001  | haCNS631 | chr2  | 144951143 | 144951614 | Yes |
| 2820622 | ANKRD32  | 84250  | NM_032290    | 0.0001  | haCNS789 | chr5  | 94052870  | 94053009  | No  |
| 3540552 | FUT8     | 2530   | NM_178156    | 0.0001  | haCNS207 | chr14 | 65456342  | 65456934  | Yes |
| 3071063 | GRM8     | 2918   | NM_001127326 | 0.0002  | haCNS825 | chr7  | 126501581 | 126501777 | Yes |
| 3236786 | PTER     | 9317   | NM_030664    | 0.0002  | haCNS987 | chr10 | 16540296  | 16540559  | No  |
| 3487600 | C13orf31 | 144811 | NM_001128303 | 0.0002  | haCNS595 | chr13 | 43517366  | 43517586  | No  |
| 2765590 | CENTD1   | 116984 | NM_015230    | 0.0002  | haCNS338 | chr4  | 35484158  | 35484289  | Yes |
| 3201784 | ELAVL2   | 1993   | NM_004432    | 0.0002  | haCNS387 | chr9  | 23129978  | 23130373  | Yes |
| 3906390 | PTPRT    | 11122  | NM_133170    | 0.0002  | haCNS98  | chr20 | 40244572  | 40244761  | Yes |
| 2909912 | TFAP2D   | 83741  | NM_172238    | 0.0002  | haCNS898 | chr6  | 50512523  | 50512759  | No  |
| 3144346 | RUNX1T1  | 862    | NM_175636    | 0.0002  | haCNS126 | chr8  | 92894316  | 92894877  | Yes |
| 3115008 | TRIB1    | 10221  | NM_025195    | 0.0003  | haCNS210 | chr8  | 126957973 | 126958145 | No  |
| 2750753 | TLL1     | 7092   | NM_012464    | 0.0004  | haCNS988 | chr4  | 167184201 | 167184273 | No  |
| 3278401 | FRMD4A   | 55691  | NM_018027    | 0.0004  | haCNS25  | chr10 | 14184818  | 14184985  | No  |
| 3464417 | MGAT4C   | 25834  | NM_013244    | 0.0004  | haCNS921 | chr12 | 85250930  | 85251171  | Yes |
| 3691326 | SALL1    | 6299   | NM_002968    | 0.0004  | haCNS754 | chr16 | 49610673  | 49610912  | No  |
| 3876645 | BTBD3    | 22903  | NM_181443    | 0.0004  | haCNS939 | chr20 | 12123528  | 12123668  | No  |
| 3198974 | MPDZ     | 8777   | NM_003829    | 0.0005  | haCNS792 | chr9  | 13496848  | 13497044  | Yes |
| 3545634 | NRXN3    | 9369   | NM_001105250 | 0.0005  | haCNS253 | chr14 | 79112047  | 79112303  | No  |
| 3807261 | SMAD7    | 4092   | NM_005904    | 0.0005  | haCNS916 | chr18 | 44720556  | 44720639  | No  |
| 3804452 | BRUNOL4  | 56853  | NM_001025089 | 0.0005  | haCNS39  | chr18 | 33780432  | 33780735  | Yes |
| 2681753 | FOXP1    | 27086  | NM_032682    | 0.0005  | haCNS279 | chr3  | 70727339  | 70727713  | Yes |
| 3511817 | ENOX1    | 55068  | NM_017993    | 0.0006  | haCNS336 | chr13 | 42787753  | 42787979  | Yes |
| 3121751 | CSMD1    | 64478  | NM_033225    | 0.0006  | haCNS940 | chr8  | 4926377   | 4926593   | Yes |
| 2691112 | GPR156   | 165829 | NM_153002    | 0.0007  | haCNS75  | chr3  | 121466908 | 121467055 | No  |
| 3422458 | TRHDE    | 29953  | NM_013381    | 0.0007  | haCNS536 | chr12 | 71252457  | 71252708  | Yes |
| 3646613 | A2BP1    | 54715  | NM_145892    | 0.0007  | haCNS177 | chr16 | 7224772   | 7225056   | Yes |
| 4020655 | ODZ1     | 10178  | NM_014253    | 0.0007  | haCNS231 | chrX  | 123425712 | 123426023 | Yes |
| 3149528 | TRPS1    | 7227   | NM_014112    | 0.0009  | haCNS427 | chr8  | 116786532 | 116786744 | Yes |

|         |           |        |              |        |          |       |           |           |     |
|---------|-----------|--------|--------------|--------|----------|-------|-----------|-----------|-----|
| 3189311 | PBX3      | 5090   | NM_006195    | 0.0010 | haCNS229 | chr9  | 127724955 | 127725133 | No  |
| 2867443 | MCTP1     | 79772  | NM_024717    | 0.0010 | haCNS725 | chr5  | 94082953  | 94083151  | No  |
| 2581726 | RPRM      | 56475  | NM_019845    | 0.0010 | haCNS915 | chr2  | 153690063 | 153690267 | No  |
| 3558745 | NOVA1     | 4857   | NM_006489    | 0.0011 | haCNS801 | chr14 | 25712770  | 25713442  | No  |
| 2515240 | CYBRD1    | 79901  | NM_024843    | 0.0012 | haCNS454 | chr2  | 172138565 | 172138903 | No  |
| 2501835 | DPP10     | 57628  | NM_001004360 | 0.0012 | haCNS77  | chr2  | 116190851 | 116190981 | Yes |
| 3126739 | LZTS1     | 11178  | NM_021020    | 0.0013 | haCNS464 | chr8  | 20721098  | 20721314  | Yes |
| 2663551 | NUP210    | 23225  | NM_024923    | 0.0014 | haCNS482 | chr3  | 13251264  | 13251381  | No  |
| 3298557 | GRID1     | 2894   | NM_017551    | 0.0015 | haCNS843 | chr10 | 87759049  | 87759258  | No  |
| 2709235 | DGKG      | 1608   | NM_001080745 | 0.0016 | haCNS622 | chr3  | 187439790 | 187440040 | No  |
| 3279575 | RSU1      | 6251   | NM_152724    | 0.0016 | haCNS261 | chr10 | 16745313  | 16745530  | No  |
| 3698256 | ATBF1     | 463    | NM_006885    | 0.0021 | haCNS405 | chr16 | 71225181  | 71225521  | No  |
| 3175274 | PCSK5     | 5125   | NM_006200    | 0.0021 | haCNS142 | chr9  | 77940531  | 77940723  | No  |
| 3562910 | MDGA2     | 161357 | NM_001113498 | 0.0022 | haCNS783 | chr14 | 47912909  | 47913315  | Yes |
| 2486178 | MEIS1     | 4211   | NM_002398    | 0.0022 | haCNS630 | chr2  | 66767320  | 66767720  | Yes |
| 3501999 | SOX1      | 6656   | NM_005986    | 0.0025 | haCNS396 | chr13 | 111687313 | 111687480 | Yes |
| 2800026 | ADAMTS16  | 170690 | NM_139056    | 0.0026 | haCNS679 | chr5  | 4543158   | 4543379   | No  |
| 3790982 | CDH20     | 28316  | NM_031891    | 0.0027 | haCNS42  | chr18 | 57447643  | 57447889  | Yes |
| 3575906 | C14orf143 | 90141  | NM_145231    | 0.0032 | haCNS67  | chr14 | 89285946  | 89286415  | Yes |
| 2512752 | TBR1      | 10716  | NM_006593    | 0.0036 | haCNS106 | chr2  | 162006961 | 162007146 | No  |
| 2788926 | NR3C2     | 4306   | NM_000901    | 0.0038 | haCNS929 | chr4  | 149889169 | 149889415 | No  |
| 3105271 | RALYL     | 138046 | NM_001100392 | 0.0039 | haCNS422 | chr8  | 85460840  | 85461038  | Yes |
| 2582562 | ACVR1     | 90     | NM_001111067 | 0.0039 | haCNS238 | chr2  | 158350161 | 158350328 | No  |
| 3209060 | TRPM3     | 80036  | NM_001007471 | 0.0042 | haCNS36  | chr9  | 73051347  | 73051585  | No  |
| 2597867 | IKZF2     | 22807  | NM_016260    | 0.0042 | haCNS586 | chr2  | 213642353 | 213642742 | Yes |
| 3989448 | GRIA3     | 2892   | NM_007325    | 0.0043 | haCNS676 | chrX  | 121624025 | 121624240 | Yes |
| 2790109 | ANXA2     | 302    | NM_001002858 | 0.0044 | haCNS52  | chr15 | 58454869  | 58455141  | Yes |
| 3198346 | PTPRD     | 5789   | NM_130393    | 0.0044 | haCNS3   | chr9  | 8150478   | 8150724   | Yes |
| 2690012 | LSAMP     | 4045   | NM_002338    | 0.0051 | haCNS165 | chr3  | 117387987 | 117388234 | Yes |
| 3329537 | MGC4707   | 79096  | NM_001003678 | 0.0053 | haCNS245 | chr11 | 46999772  | 46999996  | No  |
| 2635641 | PVRL3     | 25945  | NM_015480    | 0.0055 | haCNS189 | chr3  | 112142557 | 112142694 | No  |
| 2411642 | AGBL4     | 84871  | NM_032785    | 0.0055 | haCNS236 | chr1  | 49254538  | 49254702  | Yes |
| 3406493 | DERA      | 51071  | NM_015954    | 0.0056 | haCNS79  | chr12 | 16128227  | 16128340  | Yes |
| 3472468 | RBM19     | 9904   | NM_016196    | 0.0056 | haCNS673 | chr12 | 112952379 | 112952584 | Yes |
| 2490351 | CTNNA2    | 1496   | NM_004389    | 0.0059 | haCNS92  | chr2  | 80656208  | 80656388  | Yes |
| 3767465 | AXIN2     | 8313   | NM_004655    | 0.0061 | haCNS772 | chr17 | 60865562  | 60865946  | No  |
| 2445357 | ASTN1     | 460    | NM_207108    | 0.0061 | haCNS243 | chr1  | 175275857 | 175276091 | Yes |
| 3498837 | PCCA      | 5095   | NM_000282    | 0.0062 | haCNS254 | chr13 | 99924009  | 99924525  | No  |
| 2778856 | TSPAN5    | 10098  | NM_005723    | 0.0068 | haCNS665 | chr4  | 99861408  | 99861712  | No  |
| 2444899 | TNR       | 7143   | NM_003285    | 0.0080 | haCNS87  | chr1  | 173971307 | 173971531 | Yes |
| 3367673 | MPPED2    | 744    | NM_001584    | 0.0082 | haCNS144 | chr11 | 30675089  | 30675240  | Yes |
| 2743370 | C4orf33   | 132321 | NM_001099783 | 0.0087 | haCNS62  | chr4  | 130422202 | 130422395 | Yes |

**Table S13b. Regional DEX genes with associated haCNSs**

| Exon Array Transcript Cluster ID | Official Gene Symbol | Entrez GeneID | RefSeq Accession | Regional DEX p-value | haCNS    | chr   | start     | stop      | caCNS? |
|----------------------------------|----------------------|---------------|------------------|----------------------|----------|-------|-----------|-----------|--------|
| 3698256                          | ATBF1                | 463           | NM_006885        | 2.3E-58              | haCNS405 | chr16 | 71225181  | 71225521  | No     |
| 2512752                          | TBR1                 | 10716         | NM_006593        | 5.9E-57              | haCNS106 | chr2  | 162006961 | 162007146 | No     |
| 3530655                          | FOXG1                | 2290          | NM_005249        | 4.1E-52              | haCNS167 | chr14 | 27669435  | 27670228  | Yes    |
| 3132616                          | ZMAT4                | 79698         | NM_024645        | 5.9E-46              | haCNS709 | chr8  | 40877703  | 40877901  | Yes    |
| 3517251                          | DACH1                | 1602          | NM_004392        | 3.3E-44              | haCNS60  | chr13 | 70621753  | 70622354  | Yes    |
| 2546409                          | ALK                  | 238           | NM_004304        | 1.2E-43              | haCNS250 | chr2  | 29941244  | 29941439  | Yes    |
| 2702610                          | SHOX2                | 6474          | NM_003030        | 1.5E-41              | haCNS655 | chr3  | 159094527 | 159094780 | Yes    |
| 3019793                          | FOXP2                | 93986         | NM_148900        | 2.0E-41              | haCNS169 | chr7  | 114199879 | 114200201 | Yes    |
| 3808854                          | TCF4                 | 6925          | NM_003199        | 6.5E-41              | haCNS13  | chr18 | 51877439  | 51877698  | Yes    |
| 2782822                          | NDST4                | 64579         | NM_022569        | 7.2E-40              | haCNS251 | chr4  | 116748095 | 116748200 | Yes    |
| 3189311                          | PBX3                 | 5090          | NM_006195        | 2.4E-39              | haCNS229 | chr9  | 127724955 | 127725133 | No     |
| 3889833                          | DOK5                 | 55816         | NM_177959        | 1.9E-38              | haCNS695 | chr20 | 52926808  | 52927102  | Yes    |
| 2808931                          | ISL1                 | 3670          | NM_002202        | 4.3E-38              | haCNS365 | chr5  | 51097380  | 51097670  | No     |
| 3252690                          | C10orf11             | 83938         | NM_032024        | 6.1E-38              | haCNS617 | chr10 | 77108172  | 77108614  | Yes    |
| 3272205                          | INPP5A               | 3632          | NM_005539        | 7.6E-37              | haCNS475 | chr10 | 134321340 | 134322047 | No     |
| 3876645                          | BTBD3                | 22903         | NM_181443        | 1.0E-35              | haCNS939 | chr20 | 12123528  | 12123668  | No     |
| 2945129                          | PRL                  | 5617          | NM_000948        | 2.0E-35              | haCNS659 | chr6  | 22225960  | 22226220  | No     |
| 2486178                          | MEIS1                | 4211          | NM_002398        | 5.4E-35              | haCNS630 | chr2  | 66767320  | 66767720  | Yes    |
| 2579572                          | ZEB2                 | 9839          | NM_014795        | 3.6E-34              | haCNS631 | chr2  | 144951143 | 144951614 | Yes    |
| 3401325                          | TSPAN9               | 10867         | NM_006675        | 6.0E-34              | haCNS105 | chr12 | 3117135   | 3117301   | Yes    |
| 3517051                          | KLHL1                | 57626         | NM_020866        | 1.0E-33              | haCNS104 | chr13 | 68201696  | 68201994  | No     |
| 3627422                          | RORA                 | 6095          | NM_134260        | 1.9E-33              | haCNS799 | chr15 | 59604053  | 59604352  | No     |
| 2600881                          | PAX3                 | 5077          | NM_181457        | 3.2E-33              | haCNS697 | chr2  | 222499342 | 222499556 | Yes    |

|         |           |        |              |         |          |       |           |           |     |
|---------|-----------|--------|--------------|---------|----------|-------|-----------|-----------|-----|
| 2875685 | FSTL4     | 23105  | NM_015082    | 4.9E-33 | haCNS110 | chr5  | 132704326 | 132704467 | Yes |
| 2479746 | C2orf34   | 79823  | NM_024766    | 5.9E-33 | haCNS171 | chr2  | 44560609  | 44560780  | No  |
| 3792273 | CDH7      | 1005   | NM_004361    | 1.2E-32 | haCNS161 | chr18 | 61323894  | 61323995  | No  |
| 3284596 | PARD3     | 56288  | NM_019619    | 1.2E-32 | haCNS148 | chr10 | 34257615  | 34257789  | No  |
| 3345940 | CNTN5     | 53942  | NM_014361    | 8.0E-32 | haCNS775 | chr11 | 99952585  | 99952870  | Yes |
| 3447348 | SOX5      | 6660   | NM_178010    | 2.1E-31 | haCNS610 | chr12 | 24060581  | 24060839  | No  |
| 2566848 | AFF3      | 3899   | NM_001025108 | 5.7E-31 | haCNS433 | chr2  | 100024443 | 100024634 | No  |
| 3524570 | EFNB2     | 1948   | NM_004093    | 1.3E-30 | haCNS763 | chr13 | 105744999 | 105745127 | Yes |
| 3071063 | GRM8      | 2918   | NM_000845    | 1.8E-30 | haCNS825 | chr7  | 126501581 | 126501777 | Yes |
| 3042610 | SKAP2     | 8935   | NM_003930    | 2.4E-30 | haCNS347 | chr7  | 26731146  | 26731314  | Yes |
| 3928211 | GRIK1     | 2897   | NM_175611    | 2.6E-30 | haCNS814 | chr21 | 29852591  | 29852811  | Yes |
| 3292169 | CTNNA3    | 29119  | NM_013266    | 4.1E-30 | haCNS942 | chr10 | 68886082  | 68886308  | Yes |
| 2624639 | CACNA2D3  | 55799  | NM_018398    | 1.7E-29 | haCNS516 | chr3  | 54809508  | 54809792  | Yes |
| 2689516 | ZBTB20    | 26137  | NM_015642    | 2.4E-29 | haCNS765 | chr3  | 115755628 | 115755992 | Yes |
| 3361672 | LMO1      | 4004   | NM_002315    | 2.6E-29 | haCNS364 | chr11 | 8294097   | 8294376   | No  |
| 3496409 | GPC5      | 2262   | NM_004466    | 2.7E-29 | haCNS472 | chr13 | 92257717  | 92257914  | Yes |
| 3546924 | FLRT2     | 23768  | NM_013231    | 2.8E-29 | haCNS462 | chr14 | 84194020  | 84194222  | Yes |
| 2833286 | ARHGAP26  | 23092  | NM_015071    | 6.4E-29 | haCNS343 | chr5  | 142528037 | 142528287 | No  |
| 3446137 | LMO3      | 55885  | NM_018640    | 1.4E-28 | haCNS121 | chr12 | 16596252  | 16596435  | Yes |
| 3494137 | LMO7      | 4008   | NM_005358    | 2.8E-28 | haCNS645 | chr13 | 75637527  | 75637738  | Yes |
| 3300597 | FER1L3    | 26509  | NM_133337    | 4.5E-28 | haCNS953 | chr10 | 95092729  | 95092949  | No  |
| 2379665 | PROX1     | 5629   | NM_002763    | 4.6E-27 | haCNS878 | chr1  | 212169333 | 212169505 | No  |
| 4022183 | HS6ST2    | 90161  | NM_147174    | 6.2E-27 | haCNS524 | chrX  | 131840365 | 131840756 | Yes |
| 2339872 | ROR1      | 4919   | NM_005012    | 7.1E-27 | haCNS354 | chr1  | 64363286  | 64363784  | No  |
| 3646613 | A2BP1     | 54715  | NM_145891    | 2.8E-26 | haCNS177 | chr16 | 7224772   | 7225056   | Yes |
| 2872047 | SEMA6A    | 57556  | NM_020796    | 1.3E-25 | haCNS316 | chr5  | 115812653 | 115813025 | Yes |
| 3150844 | SNTB1     | 6641   | NM_021021    | 1.4E-25 | haCNS667 | chr8  | 121710864 | 121711040 | Yes |
| 2918388 | POU3F2    | 5454   | NM_005604    | 4.9E-25 | haCNS145 | chr6  | 99052913  | 99053392  | Yes |
| 2992243 | DNAH11    | 8701   | NM_003777    | 5.0E-25 | haCNS812 | chr7  | 21833084  | 21833547  | No  |
| 2681044 | FAM19A4   | 151647 | NM_001005527 | 6.5E-25 | haCNS191 | chr3  | 69054419  | 69054602  | No  |
| 3176209 | TLE4      | 7091   | NM_007005    | 1.4E-24 | haCNS551 | chr9  | 81881072  | 81881552  | Yes |
| 2750753 | TLL1      | 7092   | NM_012464    | 5.0E-24 | haCNS988 | chr4  | 167184201 | 167184273 | No  |
| 4022447 | GPC3      | 2719   | NM_004484    | 5.6E-24 | haCNS288 | chrX  | 132922619 | 132923153 | No  |
| 3149528 | TRPS1     | 7227   | NM_014112    | 7.2E-24 | haCNS427 | chr8  | 116786532 | 116786744 | Yes |
| 2788926 | NR3C2     | 4306   | NM_000901    | 1.2E-23 | haCNS929 | chr4  | 149889169 | 149889415 | No  |
| 3323052 | NAV2      | 89797  | NM_145117    | 1.3E-23 | haCNS684 | chr11 | 19763499  | 19763781  | No  |
| 3126739 | LZTS1     | 11178  | NM_021020    | 3.3E-23 | haCNS464 | chr8  | 20721098  | 20721314  | Yes |
| 3516228 | PCDH20    | 64881  | NM_022843    | 5.6E-23 | haCNS430 | chr13 | 63119243  | 63119376  | Yes |
| 3361811 | STK33     | 65975  | NM_030906    | 1.4E-22 | haCNS147 | chr11 | 8340293   | 8340769   | No  |
| 2581726 | RPRM      | 56475  | NM_019845    | 3.3E-22 | haCNS915 | chr2  | 153690063 | 153690267 | No  |
| 3199207 | NFIB      | 4781   | NM_005596    | 6.0E-22 | haCNS349 | chr9  | 14315359  | 14315644  | No  |
| 2345286 | LMO4      | 8543   | NM_006769    | 2.0E-21 | haCNS51  | chr1  | 87848467  | 87848709  | Yes |
| 2884727 | ATP10B    | 23120  | AB018258     | 2.4E-21 | haCNS416 | chr5  | 159910690 | 159910937 | No  |
| 4051849 | PTCH1     | 5727   | NM_000264    | 2.6E-21 | haCNS232 | chr9  | 97461843  | 97462028  | No  |
| 2778856 | TSPAN5    | 10098  | NM_005723    | 2.7E-21 | haCNS665 | chr4  | 99861408  | 99861712  | No  |
| 2524016 | PARD3B    | 117583 | NM_152526    | 3.3E-21 | haCNS460 | chr2  | 205999868 | 206000078 | Yes |
| 2800026 | ADAMTS16  | 170690 | NM_139056    | 4.3E-21 | haCNS679 | chr5  | 4543158   | 4543379   | No  |
| 2851511 | CDH9      | 1007   | NM_016279    | 6.1E-21 | haCNS513 | chr5  | 28348357  | 28348627  | Yes |
| 2340078 | VWCD1     | 57685  | NM_020925    | 7.6E-21 | haCNS737 | chr1  | 64788442  | 64788738  | No  |
| 3631214 | TLE3      | 7090   | NM_005078    | 9.5E-21 | haCNS155 | chr15 | 67927785  | 67927896  | No  |
| 2920085 | FLJ10159  | 55084  | NM_018013    | 2.6E-20 | haCNS140 | chr6  | 108071093 | 108071302 | No  |
| 2515240 | CYBRD1    | 79901  | NM_024843    | 2.7E-20 | haCNS454 | chr2  | 172138565 | 172138903 | No  |
| 3175274 | PCSK5     | 5125   | NM_006200    | 3.3E-20 | haCNS142 | chr9  | 77940531  | 77940723  | No  |
| 3989448 | GRIA3     | 2892   | NM_181894    | 4.2E-20 | haCNS676 | chrX  | 121624025 | 121624240 | Yes |
| 3234277 | GATA3     | 2625   | NM_001002295 | 9.5E-20 | haCNS199 | chr10 | 9281853   | 9282602   | No  |
| 2470838 | MYCN      | 4613   | NM_005378    | 1.3E-19 | haCNS133 | chr2  | 16142328  | 16142508  | No  |
| 3463056 | CSRP2     | 1466   | NM_001321    | 1.7E-19 | haCNS111 | chr12 | 75867499  | 75867642  | No  |
| 2341387 | LRRC7     | 57554  | NM_020794    | 4.4E-19 | haCNS143 | chr1  | 69852865  | 69852998  | No  |
| 3393311 | DSCAML1   | 57453  | NM_020693    | 7.2E-19 | haCNS459 | chr11 | 116838424 | 116838793 | Yes |
| 3218151 | GRIN3A    | 116443 | NM_133445    | 8.5E-19 | haCNS424 | chr9  | 103669473 | 103669856 | Yes |
| 2576988 | LYPD1     | 116372 | NM_144586    | 1.0E-18 | haCNS95  | chr2  | 133063363 | 133063559 | No  |
| 2762088 | LDB2      | 9079   | NM_001290    | 1.2E-18 | haCNS432 | chr4  | 16679857  | 16680021  | No  |
| 2503929 | CNTNAP5   | 129684 | NM_138996    | 1.2E-18 | haCNS815 | chr2  | 126009228 | 126009329 | No  |
| 2827057 | GRAMD3    | 65983  | NM_023927    | 1.3E-18 | haCNS223 | chr5  | 125262531 | 125263211 | Yes |
| 2380440 | LOC128153 | 128153 | NM_138796    | 1.6E-18 | haCNS194 | chr1  | 216010735 | 216011313 | No  |
| 3144346 | RUNX1T1   | 862    | NM_175634    | 1.6E-18 | haCNS126 | chr8  | 92894316  | 92894877  | Yes |
| 2973376 | PTPRK     | 5796   | NM_002844    | 1.9E-18 | haCNS600 | chr6  | 128550930 | 128551035 | No  |
| 3542275 | SMOC1     | 64093  | NM_022137    | 2.5E-18 | haCNS461 | chr14 | 69389036  | 69389264  | No  |
| 2703902 | BCHE      | 590    | NM_000055    | 3.0E-18 | haCNS755 | chr3  | 167665520 | 167665813 | Yes |
| 3308241 | GFRA1     | 2674   | NM_145793    | 3.1E-18 | haCNS558 | chr10 | 117765211 | 117765317 | No  |
| 2515627 | ITGA6     | 3655   | NM_000210    | 5.4E-18 | haCNS747 | chr2  | 172959698 | 172959941 | No  |
| 3627248 | ANXA2     | 302    | NM_001002857 | 6.6E-18 | haCNS52  | chr15 | 58454869  | 58455141  | Yes |
| 3174816 | ANXA1     | 301    | NM_000700    | 7.3E-18 | haCNS357 | chr9  | 75045823  | 75046044  | No  |

|         |           |        |           |         |          |       |           |           |     |
|---------|-----------|--------|-----------|---------|----------|-------|-----------|-----------|-----|
| 3319073 | SYT9      | 143425 | NM_175733 | 1.2E-17 | haCNS540 | chr11 | 7392512   | 7392848   | No  |
| 2736060 | GRID2     | 2895   | NM_001510 | 1.2E-17 | haCNS447 | chr4  | 94325526  | 94325665  | Yes |
| 3897505 | JAG1      | 182    | NM_000214 | 1.7E-17 | haCNS808 | chr20 | 11057526  | 11057672  | Yes |
| 3694215 | CDH8      | 1006   | NM_001796 | 3.3E-17 | haCNS72  | chr16 | 61919767  | 61919944  | Yes |
| 3545634 | NRXN3     | 9369   | NM_138970 | 3.4E-17 | haCNS253 | chr14 | 79112047  | 79112303  | No  |
| 3790982 | CDH20     | 28316  | NM_031891 | 3.7E-17 | haCNS42  | chr18 | 57447643  | 57447889  | Yes |
| 2837029 | SGCD      | 6444   | NM_172244 | 3.7E-17 | haCNS358 | chr5  | 155610296 | 155610585 | Yes |
| 3367673 | MPPED2    | 744    | NM_001584 | 4.6E-17 | haCNS144 | chr11 | 30675089  | 30675240  | Yes |
| 2608469 | ITPR1     | 3708   | NM_002222 | 6.5E-17 | haCNS611 | chr3  | 4765328   | 4765561   | No  |
| 2607757 | CNTN6     | 27255  | NM_014461 | 7.6E-17 | haCNS394 | chr3  | 1686232   | 1686505   | Yes |
| 3148463 | ANGPT1    | 284    | NM_001146 | 1.6E-16 | haCNS54  | chr8  | 108285726 | 108286111 | No  |
| 3575906 | C14orf143 | 90141  | NM_145231 | 1.8E-16 | haCNS67  | chr14 | 89285946  | 89286415  | Yes |
| 3519624 | SLITRK1   | 114798 | NM_052910 | 1.9E-16 | haCNS55  | chr13 | 83764795  | 83765037  | No  |
| 2613293 | KCNH8     | 131096 | NM_144633 | 2.0E-16 | haCNS706 | chr3  | 18982904  | 18983063  | No  |
| 3356539 | HNT       | 50863  | NM_016522 | 2.9E-16 | haCNS58  | chr11 | 131357793 | 131357915 | Yes |
| 2680819 | SUCLG2    | 8801   | NM_003848 | 3.8E-16 | haCNS392 | chr3  | 67832929  | 67833044  | Yes |
| 3757840 | STAT3     | 6774   | NM_003150 | 7.6E-16 | haCNS918 | chr17 | 37784188  | 37784336  | No  |
| 2771342 | EPHA5     | 2044   | NM_004439 | 8.0E-16 | haCNS967 | chr4  | 66160039  | 66160138  | Yes |
| 3618333 | MEIS2     | 4212   | NM_170674 | 1.3E-15 | haCNS486 | chr15 | 34964313  | 34964458  | No  |
| 3496637 | GPC6      | 10082  | NM_005708 | 2.2E-15 | haCNS329 | chr13 | 93159803  | 93159950  | No  |
| 3972657 | IL1RAPL1  | 11141  | NM_014271 | 2.4E-15 | haCNS894 | chrX  | 29345332  | 29345661  | Yes |
| 3727449 | TOM1L1    | 10040  | NM_005486 | 2.9E-15 | haCNS834 | chr17 | 49860330  | 49860522  | Yes |
| 7385641 | CLSTN2    | 64084  | NM_022131 | 3.8E-15 | haCNS489 | chr3  | 141585826 | 141585979 | Yes |
| 3653266 | CACNG3    | 10368  | NM_006539 | 4.0E-15 | haCNS911 | chr16 | 24352475  | 24352653  | No  |
| 2809399 | FST       | 10468  | NM_006350 | 4.1E-15 | haCNS518 | chr5  | 52691897  | 52692234  | Yes |
| 3029900 | CNTNAP2   | 26047  | NM_014141 | 5.1E-15 | haCNS97  | chr7  | 145618470 | 145618578 | Yes |
| 2470165 | TRIB2     | 28951  | NM_021643 | 8.5E-15 | haCNS468 | chr2  | 12455705  | 12455889  | No  |
| 3464860 | DUSP6     | 1848   | NM_001946 | 8.6E-15 | haCNS240 | chr12 | 88267696  | 88268072  | Yes |
| 3788560 | DCC       | 1630   | NM_005215 | 1.1E-14 | haCNS218 | chr18 | 47660078  | 47660381  | Yes |
| 3518086 | TBC1D4    | 9882   | NM_014832 | 1.1E-14 | haCNS437 | chr13 | 74309835  | 74309973  | No  |
| 3384704 | DLG2      | 1740   | NM_001364 | 2.2E-14 | haCNS746 | chr11 | 83100042  | 83100234  | Yes |
| 3117384 | KHDRBS3   | 10656  | NM_006558 | 2.3E-14 | haCNS816 | chr8  | 136697839 | 136698088 | Yes |
| 3093526 | UNC5D     | 137970 | NM_080872 | 2.8E-14 | haCNS793 | chr8  | 35643432  | 35643696  | Yes |
| 3653786 | HS3ST4    | 9951   | NM_006040 | 3.0E-14 | haCNS211 | chr16 | 25438002  | 25438158  | Yes |
| 2424524 | DPYD      | 1806   | NM_000110 | 4.3E-14 | haCNS537 | chr1  | 98395817  | 98395988  | No  |
| 3159946 | SMARCA2   | 6595   | NM_003070 | 4.4E-14 | haCNS521 | chr9  | 2040744   | 2041141   | Yes |
| 2370433 | CACNA1E   | 777    | NM_000721 | 5.5E-14 | haCNS568 | chr1  | 180044534 | 180044778 | No  |
| 2763550 | PPARGC1A  | 10891  | NM_013261 | 1.0E-13 | haCNS68  | chr4  | 23484769  | 23485247  | Yes |
| 2387126 | RYR2      | 6262   | NM_001035 | 1.5E-13 | haCNS383 | chr1  | 235274374 | 235274542 | No  |
| 3495968 | SLITRK5   | 26050  | NM_015567 | 1.8E-13 | haCNS616 | chr13 | 86603709  | 86603919  | Yes |
| 2681753 | FOXP1     | 27086  | NM_032682 | 2.1E-13 | haCNS279 | chr3  | 70727339  | 70727713  | Yes |
| 3970642 | CDKL5     | 6792   | NM_003159 | 2.4E-13 | haCNS809 | chrX  | 18355388  | 18355665  | No  |
| 2970607 | HS3ST5    | 222537 | NM_153612 | 2.8E-13 | haCNS832 | chr6  | 115043272 | 115043392 | No  |
| 2867443 | MCTP1     | 79772  | NM_024717 | 3.5E-13 | haCNS725 | chr5  | 94082953  | 94083151  | No  |
| 2686023 | DCBLD2    | 131566 | NM_080927 | 5.5E-13 | haCNS30  | chr3  | 100258326 | 100258437 | No  |
| 2628482 | FAM19A1   | 407738 | NM_213609 | 6.6E-13 | haCNS404 | chr3  | 68030843  | 68031386  | Yes |
| 2996753 | GPR154    | 387129 | NM_207172 | 9.8E-13 | haCNS767 | chr7  | 34857682  | 34857853  | No  |
| 2909948 | TFAP2B    | 7021   | NM_003221 | 1.0E-12 | haCNS620 | chr6  | 51031996  | 51032335  | No  |
| 2805078 | CDH6      | 1004   | NM_004932 | 1.1E-12 | haCNS753 | chr5  | 30891924  | 30892049  | Yes |
| 3266408 | EMX2      | 2018   | NM_004098 | 2.0E-12 | haCNS278 | chr10 | 119497592 | 119497757 | No  |
| 2453370 | PLXNA2    | 5362   | NM_025179 | 2.5E-12 | haCNS887 | chr1  | 206674809 | 206675260 | Yes |
| 3420854 | DYRK2     | 8445   | NM_006482 | 2.7E-12 | haCNS129 | chr12 | 66573162  | 66573339  | No  |
| 3347939 | LOC399947 | 399947 | NM_207645 | 2.7E-12 | haCNS759 | chr11 | 108909085 | 108909365 | No  |
| 3091699 | PNOC      | 5368   | NM_006228 | 3.4E-12 | haCNS599 | chr8  | 28221733  | 28221885  | No  |
| 2514969 | GAD1      | 2571   | NM_013445 | 5.8E-12 | haCNS57  | chr2  | 171387763 | 171387967 | No  |
| 3762753 | CA10      | 56934  | NM_020178 | 5.8E-12 | haCNS299 | chr17 | 47184433  | 47184693  | Yes |
| 3368814 | LMO2      | 4005   | NM_005574 | 7.5E-12 | haCNS860 | chr11 | 33884825  | 33885317  | No  |
| 3735679 | MGAT5B    | 146664 | NM_144677 | 1.1E-11 | haCNS828 | chr17 | 72550489  | 72550735  | No  |
| 2425652 | OLFM3     | 118427 | NM_058170 | 1.5E-11 | haCNS663 | chr1  | 101905911 | 101906137 | Yes |
| 3610110 | NR2F2     | 7026   | NM_021005 | 2.0E-11 | haCNS32  | chr15 | 94753758  | 94754013  | Yes |
| 2935475 | QKI       | 9444   | NM_206855 | 2.7E-11 | haCNS952 | chr6  | 164340502 | 164340877 | No  |
| 2600689 | EPHA4     | 2043   | NM_004438 | 3.1E-11 | haCNS201 | chr2  | 221757000 | 221757162 | Yes |
| 2522094 | DNAPT6    | 26010  | NM_015535 | 3.2E-11 | haCNS686 | chr2  | 200746296 | 200746745 | No  |
| 2743800 | PCDH10    | 57575  | NM_032961 | 3.7E-11 | haCNS565 | chr4  | 134658662 | 134659043 | Yes |
| 3707812 | KIAA0523  | 23302  | NM_015253 | 4.9E-11 | haCNS613 | chr17 | 5898788   | 5898921   | No  |
| 2976768 | CITED2    | 10370  | NM_006079 | 8.1E-11 | haCNS182 | chr6  | 140440650 | 140441005 | No  |
| 2554975 | BCL11A    | 53335  | NM_018014 | 8.6E-11 | haCNS101 | chr2  | 59740616  | 59740976  | Yes |
| 2971801 | MAN1A1    | 4121   | NM_005907 | 9.6E-11 | haCNS623 | chr6  | 120083887 | 120084154 | Yes |
| 3725685 | NGFR      | 4804   | NM_002507 | 1.2E-10 | haCNS693 | chr17 | 44909962  | 44910419  | No  |
| 3562910 | MDGA2     | 161357 | NM_182830 | 1.4E-10 | haCNS783 | chr14 | 47912909  | 47913315  | Yes |
| 3804452 | BRUNOL4   | 56853  | NM_020180 | 1.6E-10 | haCNS39  | chr18 | 33780432  | 33780735  | Yes |
| 2444899 | TNR       | 7143   | NM_003285 | 1.8E-10 | haCNS87  | chr1  | 173971307 | 173971531 | Yes |
| 2601995 | IRS1      | 3667   | NM_005544 | 1.9E-10 | haCNS856 | chr2  | 227070286 | 227070455 | No  |

|         |          |        |              |         |          |       |           |           |     |
|---------|----------|--------|--------------|---------|----------|-------|-----------|-----------|-----|
| 3519309 | SPRY2    | 10253  | NM_005842    | 3.9E-10 | haCNS313 | chr13 | 81444472  | 81444787  | Yes |
| 3531736 | NPAS3    | 64067  | NM_173159    | 5.4E-10 | haCNS96  | chr14 | 32888896  | 32889211  | Yes |
| 2607923 | CNTN4    | 152330 | NM_175607    | 7.2E-10 | haCNS451 | chr3  | 2112725   | 2113157   | Yes |
| 2869880 | EFNA5    | 1946   | NM_001962    | 1.2E-09 | haCNS704 | chr5  | 106842100 | 106842248 | Yes |
| 4020655 | ODZ1     | 10178  | NM_014253    | 1.4E-09 | haCNS231 | chrX  | 123425712 | 123426023 | Yes |
| 2338719 | NFIA     | 4774   | NM_005595    | 1.4E-09 | haCNS748 | chr1  | 61483496  | 61483696  | Yes |
| 3411810 | PDZRN4   | 29951  | NM_013377    | 1.7E-09 | haCNS629 | chr12 | 40506042  | 40506255  | Yes |
| 2490351 | CTNNA2   | 1496   | NM_004389    | 2.2E-09 | haCNS92  | chr2  | 80656208  | 80656388  | Yes |
| 2524301 | NRP2     | 8828   | NM_018534    | 3.3E-09 | haCNS265 | chr2  | 206245096 | 206245372 | No  |
| 3209060 | TRPM3    | 80036  | NM_206947    | 3.5E-09 | haCNS36  | chr9  | 73051347  | 73051585  | No  |
| 3971666 | PTCHD1   | 139411 | NM_173495    | 4.1E-09 | haCNS822 | chrX  | 23228766  | 23229166  | No  |
| 2378019 | CAMK1G   | 57172  | NM_020439    | 6.4E-09 | haCNS946 | chr1  | 207801418 | 207801746 | Yes |
| 3511817 | ENOX1    | 55068  | NM_017993    | 7.0E-09 | haCNS336 | chr13 | 42787753  | 42787979  | Yes |
| 3326826 | FJX1     | 24147  | NM_014344    | 1.1E-08 | haCNS503 | chr11 | 35601290  | 35601570  | No  |
| 3136888 | TOX      | 9760   | NM_014729    | 1.2E-08 | haCNS272 | chr8  | 60588695  | 60588989  | Yes |
| 3497340 | HS6ST3   | 266722 | NM_153456    | 5.7E-08 | haCNS164 | chr13 | 96072144  | 96072321  | Yes |
| 3732230 | PITPNC1  | 26207  | NM_181671    | 8.9E-08 | haCNS206 | chr17 | 62854197  | 62854398  | No  |
| 2652801 | NLGN1    | 22871  | NM_014932    | 2.8E-07 | haCNS64  | chr3  | 175163210 | 175163607 | Yes |
| 3521083 | SOX21    | 11166  | NM_007084    | 3.1E-07 | haCNS510 | chr13 | 94278587  | 94278803  | No  |
| 3394488 | PVRL1    | 5818   | NM_002855    | 5.2E-07 | haCNS467 | chr11 | 119052625 | 119052773 | No  |
| 2667024 | EOMES    | 8320   | NM_005442    | 8.6E-07 | haCNS598 | chr3  | 27926924  | 27927073  | No  |
| 3305801 | SORCS1   | 114815 | NM_001013031 | 8.9E-07 | haCNS5   | chr10 | 108799372 | 108799584 | No  |
| 4018080 | CHRDL1   | 91851  | NM_145234    | 9.6E-07 | haCNS275 | chrX  | 109707257 | 109707663 | No  |
| 3501999 | SOX1     | 6656   | NM_005986    | 1.4E-06 | haCNS396 | chr13 | 111687313 | 111687480 | Yes |
| 3797295 | L3MBTL4  | 91133  | NM_173464    | 2.1E-06 | haCNS786 | chr18 | 5954449   | 5954661   | No  |
| 3163982 | ADAMTSL1 | 92949  | NM_052866    | 2.4E-06 | haCNS128 | chr9  | 18438142  | 18438380  | No  |
| 2854092 | LIFR     | 3977   | NM_002310    | 2.7E-06 | haCNS511 | chr5  | 38676918  | 38677173  | No  |
| 3262715 | SORCS3   | 22986  | NM_014978    | 3.3E-06 | haCNS59  | chr10 | 107090354 | 107090655 | Yes |
| 3125116 | DLC1     | 10395  | NM_024767    | 4.7E-06 | haCNS701 | chr8  | 13070339  | 13070464  | No  |
| 2873897 | MARCH3   | 115123 | NM_178450    | 7.4E-06 | haCNS341 | chr5  | 126266047 | 126266370 | Yes |
| 2709778 | BCL6     | 604    | NM_138931    | 7.6E-06 | haCNS526 | chr3  | 189110780 | 189111074 | No  |
| 3733590 | SOX9     | 6662   | NM_000346    | 8.0E-06 | haCNS346 | chr17 | 67071580  | 67071793  | Yes |
| 3427352 | NEDD1    | 121441 | NM_152905    | 9.3E-06 | haCNS973 | chr12 | 95887688  | 95887884  | Yes |
| 2455699 | USH2A    | 7399   | NM_206933    | 5.1E-03 | haCNS425 | chr1  | 213913026 | 213913214 | No  |

Table S14. Gene ontology functional annotation clustering

| Enriched biological functions (source of representative annotations) | Geometric mean EASE score | Number of genes annotated | Percentage of gene list annotated | Genes annotated (representative sample for lists > 30)                                                                                                                                                             |
|----------------------------------------------------------------------|---------------------------|---------------------------|-----------------------------------|--------------------------------------------------------------------------------------------------------------------------------------------------------------------------------------------------------------------|
| <b><i>NCTX+HIP (109 genes)</i></b>                                   |                           |                           |                                   |                                                                                                                                                                                                                    |
| transcription factor activity (GO BP)                                | 0.029                     | 14                        | 12.8%                             | RORB, TBR1, HIVEP2, SATB1, SATB2, SOX5, NEUROD2, TSHZ3, NR4A2, POU3F2, MEF2C, ZNF238, NFIX, BACH2                                                                                                                  |
| axon guidance (KEGG)                                                 | 0.048                     | 7                         | 6.4%                              | SEMA3C, SEMA3E, SEMA3E, PTNRC3, EPHB6, ADAMTSL3, SEMA3A, LUND1                                                                                                                                                     |
| nervous system development & cell differentiation (GO BP)            | 0.049                     | 21                        | 19.3%                             | TBR1, SEMA3C, SEMA3E, DACT1, FZD4, NRP3, OSTN, SEMA3A, UNC5D, AFF3, SCUBE1, CAP2, NEUROD2, NEUROG2, TSHZ3, COL12A1, HDAC9, MEF2C, CSR2, THBS1                                                                      |
| sequence-specific DNA binding (homeobox) (GO MF)                     | 0.094                     | 8                         | 7.3%                              | RORB, NR4A2, TSHZ3, POU3F2, SATB1, SATB2, MEF2C, BACH2                                                                                                                                                             |
| transcription (GO BP)/GO MF/SwissProt)                               | 0.100                     | 86                        | 78.9%                             | AKAP7, BACH2, BCL2, CAP2, CPVL, DACT1, DNAH10, EXOC4, FZD4, FAT4, HDAC9, HIVEP2, KLHL1, MEF2C, NELL2, NEUROD2, OSTN, POU3F2, RNF182, RPRM, SATB1, SATB2, SEMA3A, SLA, SOX5, TBR1, THBS1, TMOD1, TSHZ3, ZNF238      |
| laminin G, thrombospondin-type; EGF (InterPro)                       | 0.113                     | 11                        | 10.1%                             | RSPO3, MCTP1, RKHD3, SCUBE1, CAP2, PPEF1, FAT4, COL12A1, NELL2, THBS1, SSS2IP                                                                                                                                      |
| <b><i>HIP (109 genes)</i></b>                                        |                           |                           |                                   |                                                                                                                                                                                                                    |
| axone; cell projection (GO CC)                                       | <b>2.07E-03</b>           | 9                         | 8.3%                              | DNAH9, MAK, DNAH11, ADC, RIBC1, DNAL1, CLIC5, CRHBP, SPAG6                                                                                                                                                         |
| leucine-rich repeat (InterPro)                                       | <b>2.27E-03</b>           | 7                         | 6.4%                              | LRRRC50, LRRICQ1, LRRRC48, FLJ46156, LRRRC46, SLIT3, TSHR                                                                                                                                                          |
| phospholipid binding; calcium binding (SwissProt)                    | 0.019                     | 8                         | 7.3%                              | HPCA, PRKCA, HAPLN1, NR3C2, ITGA4, ANXA11, ANXA1, RASAL1                                                                                                                                                           |
| axonal dynein complex; cell localization (GO CC/BP)                  | 0.019                     | 25                        | 22.9%                             | NRP2, LOC440258, LATS2, DNAL1, ITGA4, STON2, ANXA1, TEK1, DNAH11, SLC35A1, DAAM2, AKT, CLIC5, SLC7A14, CTGF, SPAG6, PCGF5, ILSRA, FLJ31196, CYBR22, DNAH9, MAOB, GABRG2, KCNAB1, RIBIC1                            |
| axone; microtubule cytoskeleton (GO CC)                              | 0.025                     | 9                         | 8.3%                              | DNAH9, TEK1, DNAH11, DAAM2, EPB41L3, LATS2, DNAL1, AK7, SPAG6                                                                                                                                                      |
| cytoskeleton; armadillo domain (SwissProt/InterPro)                  | 0.025                     | 8                         | 7.3%                              | DAAM2, EPB41L3, ARMC3, PKP2, WDR16, ITGA4, SPAG6, PDLIM1                                                                                                                                                           |
| cytoskeleton (GO CC)                                                 | 0.045                     | 28                        | 25.7%                             | IQGAP2, FLJ32921, LATS2, DNAL1, ITGA4, PDLIM1, ARMC3, STON2, PKP2, NR3C2, ANXA1, ZBTB20, DNAH11, TEK1, SLC35A1, CTSH, EPB41L3, CHST6, WDR16, CLIC5, SPAG6, PCGF5, CAMK1G, DNAH9, TEB1, MAOB, KCNAB1, ANXA11        |
| <b><i>STR (105 genes)</i></b>                                        |                           |                           |                                   |                                                                                                                                                                                                                    |
| signal transduction (GO BP)                                          | <b>6.79E-07</b>           | 51                        | 48.6%                             | CDH8, CNTNAP5, CPNE5, CRABP1, CX3CL1, DIRAS2, DRD1, DTNBP1, DUSP6, EGR3, FOXP1, GNG7, GPR88, GRM3, GUCY1A3, ISL1, KCNA5, LGR8, LHX8, LRRRC56, NMBR, PDE7B, PDYN, POU3F4, RAB31, RAR, RGS4, RGS9, TITF1, WNT7A      |
| synaptic transmission of nerve impulse (GO BP)                       | <b>4.75E-04</b>           | 17                        | 16.2%                             | DTNBP1, GRM3, ADRA1B, POU3F4, ALDH5A1, WNT7A, DRD2, SLC5A7, MME, PDE7B, PROK2, PDYN, DRD3, RGS9, DRD1, ADORA2A, TAC1                                                                                               |
| neurotransmitter (DA) receptor activity (GO MF)                      | <b>1.21E-03</b>           | 7                         | 6.7%                              | BRS3, ADRA1B, DRD3, DRD1, DRD2, NMBR, TACR1                                                                                                                                                                        |
| G-protein coupled receptor protein signaling pathway (GO BP/KEGG)    | <b>6.08E-03</b>           | 44                        | 41.9%                             | ALDH5A1, CX3CL1, DIRAS2, DRD1, GPR88, GUCY1A3, KCNA5, LGR8, PDE7B, PDYN, RAR, RGS9, SLC40A1, TAC1, TSPAN9, WNT7A                                                                                                   |
| neuropeptide signaling pathway (GO BP/SwissProt)                     | 0.011                     | 4                         | 3.8%                              | PDYN, PROK2, TAC1, TAC3                                                                                                                                                                                            |
| regulation of MAPK activity/protein kinase cascade (GO BP)           | 0.022                     | 12                        | 11.4%                             | RGS4, DIRAS3, STAT4, GRM3, ADRA1B, PROK2, TPDS2L1, SECTM1, RGS2, LOH11CR2A, ADORA2A, DUSP6                                                                                                                         |
| regulation of signal transduction/GPCR signaling (GO BP)             | 0.023                     | 12                        | 11.4%                             | RGS4, GRM3, WFD2C, PROK2, TPDS2L1, GNG7, SECTM1, RGS2, RGS14, LOH11CR2A, RGS9, DUSP6                                                                                                                               |
| cyclic nucleotide biosynthesis (GO BP)                               | 0.024                     | 15                        | 14.3%                             | BRS3, PPARGC1A, DRD2, PDE10A, BKDH4, GUCY1B3, LOC129607, SLC5A7, PDE7B, HSD17B6, DRD1, ADORA2A, ADCY5, GCNT3, GUCY1A3                                                                                              |
| plasma membrane (GO CC)                                              | 0.028                     | 48                        | 45.7%                             | ADRA1B, CACNG5, CDH8, DIRAS2, DRD3, GCNT3, GNG7, GRM3, KCNJ2, LAMC2, MCAM, PTGES, SCAP2, SLC40A1, SMOC2, TMEPAI                                                                                                    |
| regulation of enzyme activity (GO BP)                                | 0.046                     | 11                        | 10.5%                             | RGS4, DIRAS3, GRM3, PROK2, TPDS2L1, RGS2, RGS14, LOH11CR2A, RGS9, ADORA2A, DUSP6                                                                                                                                   |
| <b><i>THM (137 genes)</i></b>                                        |                           |                           |                                   |                                                                                                                                                                                                                    |
| nervous system development (GO BP)                                   | 0.016                     | 22                        | 16.1%                             | KCNN3, LOC440258, OLFM1, PROX1, TAL1, VAT1, PPL, MEF2A, APBB2, ST6GAL2, AKAP2, ODD2, DMBX1, CREG1, STS, CYP46A1, NTNG1, SHOX2, WNT10B, PITPNM1, VANGL1, GATA3                                                      |
| membrane (GO CC)                                                     | 0.017                     | 58                        | 42.3%                             | AKAP2, CADP5, CENTA1, CHRPFAM7A, CHST1, EPHX1, GPR153, IMPG2, KCNK10, LRFN5, MYADM, NPY6R, NTNG1, PRICKLE1, RAB15, SCN7A, SEZB2, SLC37A1, TLN2, SYT3, SYNGR3, VAT1, VANGL1                                         |
| ion channel/transporter activity/localization (SwissProt/GO MF)      | 0.018                     | 45                        | 32.8%                             | APBB2, CENTA1, CNTNAP1, CYP46A1, KCNJ5, LINA7A, NTNG1, RAB15, RIT2, SLC17A6, SLC37A1, STS, SYT3, TSPAN2, TXNDC13, TLN2, APBB2, EPHA10, GLRA3, SORCS2                                                               |
| synapse (GO CC)                                                      | 0.060                     | 12                        | 8.8%                              | TLN2, SYT3, CADP5, NPY6R, GRIN3A, OLFM1, GLRA3, EPHA10, APBB2, CHRPFAM7A, GPR153, SORCS2                                                                                                                           |
| EGF-like (InterPro)                                                  | 0.076                     | 7                         | 5.1%                              | CNTNAP1, ADAM19, NTNG1, EPHA10, ODD2, IMPG2, NRXN2                                                                                                                                                                 |
| Wnt signaling pathway (KEGG)                                         | 0.110                     | 5                         | 3.6%                              | EPHA10, NRXN2, VANGL1                                                                                                                                                                                              |
| neurotransmitter binding/receptor activity (GO MF)                   | 0.123                     | 8                         | 5.8%                              | NPY6R, OLFM1, GRIN3A, GLRA3, EPHA10, CHRPFAM7A, GPR153, SORCS2                                                                                                                                                     |
| <b><i>CBL (140 genes)</i></b>                                        |                           |                           |                                   |                                                                                                                                                                                                                    |
| extracellular matrix (GO CC)                                         | 0.016                     | 16                        | 11.4%                             | FGL2, FST, MGP, NXPH4, MFAP2, FGF5, GPC3, LCAT, RELN, ADAMT55, ADAMTS6, APOL4, ANGPTL2, SMOC1, SEPP1, FREM1                                                                                                        |
| cellular morphogenesis (GO BP)                                       | 0.059                     | 17                        | 12.1%                             | EMP1, HIST1H2AC, FGFFR1, CECR2, ABT2B, LOC440258, GPC3, DSCAML1, EXPH5, EMP3, PAX3, KIF12, HEY2, PAX2, ITGA7, PAX6, ARHGAP10                                                                                       |
| pattern specification; embryonic development (GO BP)                 | 0.107                     | 4                         | 2.9%                              | PAX3, HEY2, PAX6, DSCAML1                                                                                                                                                                                          |
| transcription factor activity; homeobox (GO MF/InterPro)             | 0.110                     | 15                        | 10.7%                             | ST18, LMX1A, TEAD2, TFAP2B, TGIF2, PAX3, GLI1, TCF12, MSX2, TCEA3, ETV4, NFATC4, HEY2, PAX6, TFAP2A                                                                                                                |
| cellular (neuronal) morphogenesis (GO BP)                            | 0.128                     | 12                        | 8.6%                              | EMP1, FGFFR1, EMP3, MGP, ABT2B, NGFR, LOC440258, NOTCH1, PAX2, ITGA7, PAX6, DSCAML1                                                                                                                                |
| EGF-like (InterPro)                                                  | 0.130                     | 6                         | 4.3%                              | RELN, MEGF10, CRB2, NOTCH1, TLL1, EPHB2                                                                                                                                                                            |
| paired box; sensory perception of light stimulus (SwissProt/GO BP)   | 0.145                     | 19                        | 13.6%                             | AGTR1, MGP, TRPC3, SLC6A5, PPM1D, PAX3, FAS, TCF12, TCEA3, TYMS, CRB2, ETV4, NFATC4, NOTCH1, SEPP1, PAX2, CERKL, PAX6, SLC1A6                                                                                      |
| <b><i>Fig. 3 NCTX clusters, combined (169 genes)</i></b>             |                           |                           |                                   |                                                                                                                                                                                                                    |
| cell adhesion (GO BP)                                                | <b>1.07E-04</b>           | 21                        | 12.4%                             | PCDH17, LAMB1, LAMA5, NCAM2, ITGA9, FCGBP, KITLG, ROBO1, CDH9, CNTNAP2, CNTNAP5, FLRT3, PDZD2, NEGR1, GPNMB, CNTNAP4, BCL6, BMPR1B, L3MBTL4, CD44, NID2                                                            |
| membrane (GO CC)                                                     | <b>2.00E-03</b>           | 95                        | 56.2%                             | CCBP2, PCDH17, GOLSVN, SULF1, BTNA3, ANK1, TGFA, PTGFR, ROBO1, SSTR2, NAALAD2, CBLN2, PDLIM1, POPDC3, PDZD2, NTNG1, NEGR1, IGFBP5, PRSS12, PTX3, CNTNAP2, SLITRK3, MBP, SLC26A7, SGCC2, NID2, CDH9, LAMB1, MASP1   |
| system development/morphogenesis (GO BP)                             | <b>2.02E-03</b>           | 57                        | 33.7%                             | BHLHB2, CCBP2, SULF1, AMK1, TGFA, ANK1, ROBO1, NAALAD2, SSTR2, IGFBP5, MBP, TRAF5, LAMB1, MASP1, NCAM2, SLITRK3, SCNNH3, STEGAL2, CNTNAP2, CTNBL1, IL7, NR4A3, COL5A2, FOXO2, L3MBTL4, NTNG1, IGFBP4, NTN4         |
| ECM: Laminin domain (InterPro)                                       | 0.013                     | 29                        | 17.2%                             | SULF1, TGFA, NTN4, PCSK5, FLRT3, PDZD2, PCSK6, TGFB3, IGFBP5, PRSS12, SPINT1, KIRREL3, PTX3, RSPO2, SGCC2, NID2, LAMB1, LAMA5, MASP1, FCGBP, KITLG, CNTNAP2, CNTNAP4, IL7, WNT5B, COL5A2, NTNG1, IGFBP4, TF        |
| Concanavalin A-like lectin/glucanase, subgroup; Laminin G (InterPro) | 0.025                     | 13                        | 7.7%                              | LAMA5, MASP1, TGFA, KITLG, CNTNAP2, CNTNAP5, TGFB3, GPNMB, CNTNAP4, IL7, PTX3, NTNG1, NID2                                                                                                                         |
| ECM-receptor interaction (KEGG)                                      | 0.055                     | 9                         | 5.3%                              | LAMB1, LAMA5, ITGA9, COL5A2, NTN4, MET, CD44, SGCC2, NID2                                                                                                                                                          |
| axon guidance (KEGG)                                                 | 0.065                     | 32                        | 18.9%                             | SULF1, CYP26B1, NTN4, ANK1, UNC5C, ROBO1, EBF1, TGFB3, IGFBP5, MAP3K5, BCL6, MBP, NGEF, MET, TRAF5, LAMB1, PRKG1, LAMA5, NCAM2, SLITRK3, RCAN2, EPHA4, CTNBL1, IL7, WNT5B, BMPR1B, FOXO2, PALMD, NTNG1, IGFBP4, TF |
| plasma membrane; signal transduction (GO CC/BP)                      | 0.067                     | 69                        | 40.8%                             | CCBP2, C13ORF18, ANK1, PTGFR, TGFA, ROBO1, RGS22, SSTR2, CNTNAP5, PDZD2, NEGR1, IGFBP5, PRSS12, STXBPA, MBP, RGS8, CNTNAP4, SHANK2, EPHA4, WNT5B, CDH9, RXRG, SGCC2, RAR, BCL6, TRAF5, CDCP1, LAMB1, YES1, NCAM2   |
| <b><i>Intra-NCTX DEX genes near haCNSs (181 genes)</i></b>           |                           |                           |                                   |                                                                                                                                                                                                                    |
| cell adhesion; cadherins (GO BP/InterPro)                            | <b>8.03E-12</b>           | 50                        | 27.6%                             | BCL6, CADM1, CDH13, CDH20, CDH22, CDH23, CDH6, CDH8, CDH9, CNTN4, CNTN6, CNTNAP2, CNTNAP5, CTNNA2, NCAM2, NRP2, NRXN3, OPCML, PCDH10, PCDH18, PCDH7, PCDH8, PCDH9, PVR1, PVR13, ROBO1, SOX9, TNR, ZEB2             |
| membrane (GO CC)                                                     | <b>1.99E-07</b>           | 106                       | 58.6%                             | ACVFR1, ADAMTSL1, CDH13, CDH22, CNTN4, CLSTN2, CNTNAP2, DCC, EPHA4, GRID1, GRIK1, KIRREL3, LPHN2, LRRTM4, MDGA2, NUP210, PCDH10, PCDH9, PTPRG, PTPRK, PTPRS, SLITRK5, SMOC1, SORCS1, UNC5D                         |
| immunoglobulin domain (InterPro)                                     | <b>6.52E-07</b>           | 20                        | 11.0%                             | HNT, PTPRS, NCAM2, PVR1, LSAMP, IGSF11, CADM1, MDGA2, CNTN6, ROBO1, GBE1, PVR13, UNC5D, CNTN4, KIRREL3, IL1RAP, PTPRK, OPCML, DCC, PTPRT                                                                           |
| nervous system development (GO BP)                                   | <b>5.54E-05</b>           | 67                        | 37.0%                             | TBR1, NRP2, CA10, MDGA2, CNTN6, ROBO1, EFNB2, ODD2, CNTN4, GRIK1, POU6F2, CHRDI, DCC, EFNA5, NCAM2, LSAMP, NRXN3, TNR, ZEB2, PBX3, FOXO2, POU3F2, NR2F1, SLITRK5, NR2F2, GFRA1, PCDH18, MPPED2                     |
| lipid binding (GO MF)                                                | <b>7.92E-05</b>           | 20                        | 11.0%                             | HNT, MCTP1, LSAMP, MDGA2, CNTN6, CNTN6, GRIK3, LYPD1, CNTN4, CAMK1G, CDH13, NR2F2, GFRA1, NR3C2, DGKG, OPCML, LZTS1, ANXA1, EFNA5                                                                                  |
| cell development; axon guidance (GO BP)                              | 0.022                     | 45                        | 24.9%                             | NRP2, MDGA2, CADM1, ACVFR1, ROBO1, UNC5D, CNTN4, CDH13, BRUNOL4, ASTN1, BCL6, POU6F2, CSR2, ANXA1, DCC, EFNA5, NRXN3, SOX9, TNR, CTNBL1, ZEB2, POU3F2, NR2F1, SLITRK5, NR2F2, EGN3, GRP2                           |
| plasma membrane; signal transduction (GO CC/BP)                      | 0.004                     | 78                        | 43.1%                             | PVR1, CNTN6, EFNB2, CNTNAP5, CDH13, PTPRK, DGKG, MCTP1, SORCS1, LPHN2, UNC5D, BCL6, CENTD1, CNTNAP2, HNT, IL1RAP, DLG1, NR3C2, AXIN2, DUSP6, GRIK1, NRP2, DCC, TBC1D4, ACVFR1, FCSK5, PTPRG, NOVA1                 |
| synaptic transmission (GO CC/MF)                                     | 0.007                     | 41                        | 22.7%                             | TRPM3, GRID1, TSPAN5, RYR2, GRIK4, CACNG3, GRIK3, GPR156, CACNA2D3, ITPR1, GRIK1, MPD2, CLSTN2, GRID2, SYTN, GRM8, LZTS1, RIMS4, GRIK2                                                                             |
| <b><i>Regional DEX genes near haCNSs (203 genes)</i></b>             |                           |                           |                                   |                                                                                                                                                                                                                    |
| system development/neurogenesis (GO BP)                              | <b>9.71E-09</b>           | 94                        | 46.3%                             | TLE3, MDGA2, CNTN6, ODD2, EMX2, TRPS1, ALK, SOX5, FOXO2, BCL11A, LMO2, MPPED2, NRP2, TBR1, CA10, NLGN1, USH2A, ANGPT1, EFNB2, SGCC2, CNTN4, BCL6, SEMA6A, EFNA5, DCC, TLL1, ZEB2, SLITRK1, POU3F2                  |
| cell adhesion; cadherins (GO BP/InterPro)                            | <b>3.05E-08</b>           | 35                        | 17.2%                             | NRP2, PTPRK, CNTN6, CNTNAP5, CDH20, CNTN4, PCDH9, BCL6, FLRT2, CDH7, CNTNAP2, ZEB2, CTNNA3, PCDH10, DLG1, L3MBTL4, CLSTN2, LMO4, CDH8, CNTN4, ITGA8, CDH6, NRXN3, CDH9, DSCAML1, SOX9                              |
| cell development; axon guidance (GO BP)                              | <b>6.74E-06</b>           | 58                        | 28.6%                             | DYRK2, NRP2, ISL1, NLGN1, UNC5D, ORL, BRUNOL4, BCL6, NGFR, EMX2, CSR2, SEMA6A, DCC, ANXA1, ZEB2, SOX9, PAX3, SLITRK5, POU3F2, NR2F2, JAG1, PAR3, TNR, MDGA2, CNTN4, EFNA5, GRIN3A, NRXN3, SLITRK1, DSCAML1         |
| lipid binding (GO MF)                                                | <b>1.02E-04</b>           | 22                        | 10.8%                             | HNT, MCTP1, GPC5, GPC6, MDGA2, CNTN6, ANXA2, GPC3, PITPN1, CNTN4, GRIK1, POU6F2, CHRDI, DCC, EFNA5, NCAM2, LSAMP, NRXN3, TNR, ZEB2, PBX3, FOXO2, POU3F2, NR2F1, SLITRK5, NR2F2, GFRA1, EFNAS                       |
| membrane (GO CC)                                                     | <b>2.31E-04</b>           | 112                       | 55.2%                             | PVR1, DCLB2, MDGA2, CNTN6, SKAP2, PAR3B, SYTN, ENOX1, TSPAN9, ALK, GPC5, GPC6, GRIN3A, NRXN3, PCDH10, L3MBTL4, CTNNA2, SNTB1, FER1L3, HNT, NPSR1, NLGN1, CLSTN2, ANXA2, PTPRK, CDH8, TNR, CTNNA3, ROR1, CDH8       |
| fibronectin type III domain (InterPro)                               | 0.001                     | 13                        | 6.4%                              | CNTN4, PTPRK, EPHA5, CNTN6, USH2A, EPHA4, DRD2, LIFR, TNR, DSCAML1, DCC                                                                                                                                            |
| immunoglobulin domain (InterPro)                                     | 0.001                     | 21                        | 10.3%                             | HNT, PVR1, FSTL4, MDGA2, IL1RAPL1, CNTN6, CNTN5, DSCAML1, DCC, CNTN4, PTPRK, ROR1, DCC                                                                                                                             |
| homeobox domain (InterPro)                                           | 0.002                     | 134                       | 66.0%                             | ISL1, TRPS1, FOXO1, MEIS1, FOXG1, ZEB2, TFAP2B, PBX3, PAX3, BCL6, MEIS2, FOXO2, POU3F2                                                                                                                             |
| transcription factor activity; gene expression (GO MF/BP)            | 0.006                     | 42                        | 20.7%                             | TLE3, NR3C2, RUNX1T1, KCNH8, POU3F2, MYCN, KHDRBS3, EMX2, NPAS3, TLE4, SOX1, ZFXH3, TFAP2B, TRPS1, SOX21, SOX5, NFIB, TBR1, Chd2, SHOX2, BRUNOL4, BCL6, ZBTB20, EOMES, LMO4, ZEB2, PAX3, MEIS2, BCL11A, TOX        |

Table S15. M32 (deepskyblue1): NCTX module

| 5-region ANOVA |                 |              |          |                      |                    |           |           |         |          |          |
|----------------|-----------------|--------------|----------|----------------------|--------------------|-----------|-----------|---------|----------|----------|
| Transcript ID  | Symbol          | Accession    | kTotal   | kWithin-Connectivity | eigencorr          | eigenpval | meanExpr  | DEX     | FoldChng | DAS      |
| 3498780        | <b>ZIC2</b>     | NM_007129    | 38.06034 | 1.00000025           | <b>-0.78733893</b> | 3.51E-20  | 7.4883608 | 4.0E-49 | 15.7     | 4.3E-50  |
| 2699844        | <b>ZIC4</b>     | NM_032153    | 35.4719  | 0.94039377           | <b>-0.76279657</b> | 2.40E-18  | 5.6991177 | 3.9E-55 | 8.8      | 7.4E-241 |
| 2341387        | LRRC7           | NM_020794    | 59.11094 | 0.877992849          | 0.9045616          | 0         | 9.714238  | 1.6E-21 | 4.3      | 1.3E-21  |
| 3780981        | <b>KIAA1772</b> | NM_024935    | 31.56723 | 0.871723995          | <b>-0.84668587</b> | 7.69E-26  | 4.7493727 | 1.4E-56 | 10.6     | 5.1E-297 |
| 2977265        | HIVEP2          | NM_006734    | 41.61134 | 0.847567476          | 0.93693355         | 0         | 9.6524963 | 7.4E-14 | 3.0      | 6.0E-03  |
| 3522398        | LOC441401       | XM_499136    | 63.99661 | 0.820578758          | 0.90348742         | 0         | 9.232575  | 1.4E-22 | 2.6      | 4.9E-61  |
| 2929870        | STXBP5          | NM_139244    | 51.25816 | 0.820004384          | 0.91449206         | 0         | 8.8312409 | 1.1E-07 | 1.8      | 3.4E-13  |
| 2839543        | KIBRA           | NM_015238    | 30.11246 | 0.810272013          | 0.83620385         | 0         | 7.5878762 | 1.0E-16 | 2.9      | 3.8E-79  |
| 3810542        | CCBE1           | NM_133459    | 26.68761 | 0.715070525          | 0.81892171         | 0         | 8.1695771 | 1.7E-19 | 7.3      | 2.1E-08  |
| 3876645        | <b>BTBD3</b>    | NM_181443    | 40.08798 | 0.703078635          | <b>-0.75292745</b> | 1.14E-17  | 7.6459617 | 1.1E-35 | 10.6     | 6.3E-90  |
| 3509411        | <b>MAB21L1</b>  | NM_005584    | 17.69564 | 0.701851182          | <b>-0.69481544</b> | 3.05E-14  | 5.4554768 | 2.5E-63 | 22.3     | 7.8E-03  |
| 3992747        | <b>ZIC3</b>     | NM_003413    | 35.15088 | 0.701315376          | <b>-0.82973121</b> | 5.28E-24  | 5.7572514 | 1.0E-40 | 8.6      | 2.0E-96  |
| 3517251        | <b>DACH1</b>    | NM_004392    | 28.92245 | 0.696723606          | <b>-0.85363064</b> | 1.17E-26  | 6.3349398 | 5.9E-47 | 9.4      | 5.6E-197 |
| 2927604        | KIAA1244        | NM_020340    | 25.21469 | 0.696132671          | 0.77239182         | 0         | 8.3535973 | 6.3E-11 | 2.5      | 1.1E-08  |
| 3058991        | CACNA2D1        | NM_000722    | 31.41785 | 0.695812596          | 0.80331298         | 0         | 9.3542428 | 4.9E-13 | 2.9      | 1.5E-05  |
| 2379974        | KCNK2           | NM_014217    | 64.73971 | 0.690769832          | 0.84167759         | 0         | 8.0872076 | 9.3E-27 | 3.8      | 2.3E-31  |
| 3530655        | FOXG1B          | NM_005249    | 33.3378  | 0.664904642          | 0.69863189         | 1.91E-14  | 9.764077  | 5.8E-53 | 33.8     | 1.3E-39  |
| 2646818        | <b>ZIC1</b>     | NM_003412    | 62.62878 | 0.629360451          | <b>-0.77150782</b> | 5.69E-19  | 6.737008  | 8.7E-46 | 41.3     | 1.4E-41  |
| 3968122        | <b>TBL1X</b>    | NM_005647    | 23.88123 | 0.62145967           | <b>-0.82488666</b> | 1.62E-23  | 6.1669808 | 1.5E-21 | 2.1      | 1.8E-72  |
| 2628482        | FAM19A1         | NM_213609    | 27.57875 | 0.596172151          | 0.82971698         | 0         | 7.9151787 | 6.0E-13 | 3.5      | 4.5E-26  |
| 3154398        | ST3GAL1         | NM_173344    | 45.28521 | 0.59022786           | 0.85098691         | 0         | 7.6219492 | 3.4E-21 | 2.6      | 1.2E-15  |
| 3323052        | NAV2            | NM_145117    | 42.64399 | 0.589117286          | 0.85036983         | 0         | 8.7114286 | 2.1E-23 | 2.9      | 2.6E-248 |
| 3362191        | <b>SCUBE2</b>   | NM_020974    | 22.30924 | 0.584706367          | <b>-0.81961196</b> | 5.31E-23  | 6.323986  | 1.0E-36 | 3.1      | 1.8E-45  |
| 3154317        | NDRG1           | NM_006096    | 47.03058 | 0.581883656          | 0.80523176         | 0         | 9.7795375 | 5.6E-43 | 6.2      | 2.0E-13  |
| 2517588        | OSBPL6          | NM_032523    | 37.69737 | 0.58014619           | 0.86269511         | 0         | 7.435529  | 2.4E-08 | 1.8      | 7.5E-24  |
| 2397025        | <b>DHR53</b>    | NM_004753    | 34.72497 | 0.565184962          | <b>-0.90714761</b> | 7.75E-35  | 6.312553  | 1.3E-33 | 2.9      | 2.0E-08  |
| 3603932        | <b>FAH</b>      | NM_000137    | 40.17296 | 0.564587766          | <b>-0.86578438</b> | 3.39E-28  | 5.885812  | 2.2E-31 | 2.6      | 9.2E-20  |
| 3684039        | CRYM            | NM_001014444 | 32.41284 | 0.562405993          | 0.71025125         | 4.44E-15  | 8.3231344 | 9.1E-32 | 7.5      | 8.9E-21  |
| 3437780        | <b>FZD10</b>    | NM_007197    | 18.20184 | 0.556512058          | <b>-0.70319587</b> | 1.10E-14  | 6.3174866 | 9.3E-35 | 4.3      | 2.9E-39  |
| 3010439        | GNAI1           | NM_002069    | 27.58903 | 0.545042066          | 0.78237343         | 0         | 8.7325945 | 6.9E-10 | 2.5      | 1.4E-17  |
| 2913277        | KCNQ5           | NM_019842    | 64.57083 | 0.539872833          | 0.8489355          | 0         | 7.4759411 | 2.4E-23 | 3.9      | 1.8E-51  |
| 2429613        | <b>NHLH2</b>    | NM_005599    | 19.25814 | 0.527820802          | <b>-0.71080124</b> | 4.22E-15  | 5.5325792 | 9.5E-39 | 3.0      | 2.2E-05  |
| 3140920        | JPH1            | NM_020647    | 36.18301 | 0.518074834          | 0.72355701         | 8.88E-16  | 7.4218053 | 5.0E-25 | 2.5      | 1.7E-12  |
| 2849469        | ANKH            | NM_054027    | 26.02333 | 0.513497842          | 0.83743708         | 0         | 8.9396323 | 5.6E-15 | 2.3      | 4.3E-32  |
| 3692280        | <b>IRX3</b>     | NM_024336    | 19.71833 | 0.498814891          | <b>-0.78031795</b> | 1.24E-19  | 6.327098  | 6.9E-28 | 2.0      | 4.6E-76  |
| 2386867        | LGALS8          | NM_201543    | 29.99432 | 0.468806539          | 0.80535037         | 0         | 8.2198927 | 3.1E-07 | 1.8      | 1.7E-01  |
| 2945598        | KIAA0319        | NM_014809    | 18.68543 | 0.46667035           | 0.83337821         | 0         | 8.3784417 | 1.1E-13 | 3.7      | 5.0E-17  |
| 2371547        | C1orf21         | NM_030806    | 17.78389 | 0.46571325           | 0.75513967         | 0         | 8.9336644 | 1.9E-11 | 1.8      | 9.7E-16  |
| 2595388        | ALS2CR15        | NM_138468    | 29.82671 | 0.45484148           | 0.82715801         | 0         | 7.9066095 | 4.8E-06 | 1.6      | 1.7E-03  |
| 3162529        | <b>C9orf150</b> | NM_203403    | 17.10034 | 0.45351095           | <b>-0.73746965</b> | 1.14E-16  | 5.52629   | 2.1E-30 | 3.7      | 1.6E-39  |
| 3485292        | NBEA            | NM_015678    | 25.14257 | 0.453290244          | 0.79245337         | 0         | 10.053034 | 1.4E-14 | 2.1      | 1.9E-44  |
| 2911903        | PTF4A1          | NM_003463    | 33.82432 | 0.437019601          | 0.82988387         | 0         | 9.834393  | 9.2E-06 | 1.8      | 1.3E-02  |
| 3106479        | EFCBP1          | NM_022351    | 22.65738 | 0.434930415          | 0.87727252         | 0         | 8.499467  | 4.1E-17 | 7.1      | 6.5E-02  |
| 2449391        | KCNT2           | NM_198503    | 23.3299  | 0.43108495           | 0.79823945         | 0         | 7.4540954 | 7.6E-06 | 1.9      | 1.8E-13  |
| 2371694        | RNF2            | NM_007212    | 28.86644 | 0.428941716          | 0.75042111         | 0         | 8.3196943 | 1.3E-04 | 1.8      | 1.5E-11  |
| 2639734        | KALRN           | NM_001024660 | 18.34529 | 0.428630072          | 0.81869945         | 0         | 8.4542296 | 4.1E-12 | 2.0      | 1.4E-23  |
| 3176209        | TLE4            | NM_007005    | 19.40939 | 0.422301152          | 0.6189485          | 7.92E-11  | 9.3450983 | 1.8E-24 | 3.6      | 6.9E-06  |
| 3605348        | SH3GL3          | NM_003027    | 55.22215 | 0.422212008          | 0.8568142          | 0         | 7.6298868 | 1.3E-17 | 2.6      | 1.9E-34  |
| 3719329        | <b>LHX1</b>     | NM_005568    | 12.68945 | 0.414818929          | <b>-0.73862426</b> | 9.66E-17  | 6.2568155 | 6.9E-37 | 4.9      | 3.8E-55  |
| 3181193        | TDRD7           | NM_014290    | 21.79404 | 0.409839455          | 0.81018715         | 0         | 7.6986386 | 2.9E-08 | 1.8      | 3.0E-16  |
| 2615808        | GPD1L           | NM_015141    | 22.86397 | 0.399582004          | 0.84849693         | 0         | 8.3333709 | 1.1E-11 | 2.4      | 4.4E-04  |
| 3594986        | <b>TEX9</b>     | NM_198524    | 31.09744 | 0.39798996           | <b>-0.72375322</b> | 7.70E-16  | 5.6643581 | 2.2E-16 | 2.8      | 5.9E-22  |
| 2480168        | PRKCE           | NM_005400    | 22.80852 | 0.388260377          | 0.85001188         | 0         | 9.0891762 | 1.5E-08 | 2.1      | 6.9E-18  |
| 2428119        | <b>KCND3</b>    | NM_004980    | 42.31862 | 0.385840507          | <b>-0.70232099</b> | 1.22E-14  | 7.1267469 | 1.3E-19 | 2.2      | 5.2E-14  |
| 2912777        | KIAA1411        | NM_020819    | 23.08773 | 0.38324795           | 0.79126084         | 0         | 8.3789246 | 1.1E-04 | 1.5      | 6.7E-03  |
| 3991109        | <b>MASK</b>     | NM_016542    | 12.75815 | 0.379381671          | <b>-0.70935012</b> | 5.08E-15  | 4.7407018 | 2.7E-07 | 1.3      | 1.0E-13  |
| 2846522        | <b>IRX2</b>     | NM_033267    | 22.0572  | 0.378030113          | <b>-0.72516659</b> | 6.36E-16  | 6.790704  | 5.9E-37 | 2.1      | 3.6E-41  |
| 3308489        | KIAA1598        | NM_018330    | 24.4298  | 0.376198819          | 0.87542883         | 0         | 9.3561661 | 7.6E-14 | 2.3      | 2.5E-50  |
| 3291151        | RHOBTB1         | NM_198225    | 14.57737 | 0.375473784          | 0.67699462         | 2.38E-13  | 7.2056955 | 1.3E-08 | 1.7      | 1.7E-07  |
| 2875685        | <b>FSTL4</b>    | NM_015082    | 11.3149  | 0.374987343          | <b>-0.67280343</b> | 3.79E-13  | 5.9852455 | 1.6E-34 | 3.7      | 1.6E-67  |
| 2639552        | KALRN           | NM_001024660 | 20.8022  | 0.374499487          | 0.78246691         | 0         | 8.3742567 | 3.0E-13 | 1.8      | 6.5E-10  |
| 2345286        | LMO4            | NM_006769    | 26.88963 | 0.369215977          | 0.69045149         | 5.11E-14  | 9.4464252 | 3.3E-21 | 4.3      | 2.0E-20  |
| 3032446        | ACTR3B          | NM_020445    | 23.44579 | 0.368345411          | 0.80148557         | 0         | 9.5555615 | 2.2E-16 | 1.8      | 3.3E-12  |
| 2739714        | FLJ39370        | NM_152400    | 22.62583 | 0.36735648           | 0.7937429          | 0         | 6.8336572 | --      | --       | --       |
| 2867873        | ELL2            | NM_012081    | 46.9506  | 0.365424624          | 0.81270252         | 0         | 6.6688661 | 1.1E-17 | 2.6      | 2.6E-03  |
| 3522914        | <b>ZIC5</b>     | NM_033132    | 17.65858 | 0.358510246          | <b>-0.7130907</b>  | 3.15E-15  | 6.7259232 | 6.0E-36 | 17.9     | 2.1E-79  |
| 2616596        | ARPP-21         | NM_001025068 | 20.16968 | 0.357098023          | 0.68007807         | 1.69E-13  | 8.8387735 | 2.4E-21 | 9.2      | 0.0E-00  |
| 3481543        | <b>SPATA13</b>  | NM_153023    | 33.07618 | 0.356788611          | <b>-0.76355976</b> | 2.12E-18  | 6.3256887 | 2.4E-23 | 2.2      | 1.5E-08  |
| 3148871        | FLJ20366        | NM_017786    | 35.19513 | 0.35632455           | 0.77938444         | 0         | 9.0423641 | 9.6E-10 | 2.7      | 1.0E+00  |
| 2895159        | HIVEP1          | NM_002114    | 11.86517 | 0.348605369          | 0.67071468         | 4.75E-13  | 7.9398905 | 3.6E-11 | 1.9      | 6.6E-11  |
| 2621583        | ZNF589          | NM_016089    | 33.80252 | 0.344058212          | 0.8216822          | 0         | 7.0874415 | 1.3E-07 | 1.5      | 6.2E-12  |
| 3087501        | ZDHHC2          | NM_016353    | 17.01718 | 0.342408901          | 0.74494848         | 0         | 8.530342  | 1.2E-08 | 2.4      | 4.8E-02  |
| 3970642        | CDKL5           | NM_003159    | 16.53096 | 0.336427508          | 0.84174557         | 0         | 8.3846549 | 1.1E-13 | 3.0      | 3.0E-23  |
| 3189617        | RALGPS1         | NM_014636    | 20.25309 | 0.333909911          | 0.74164223         | 0         | 8.5151919 | 4.0E-07 | 1.5      | 2.2E-05  |

|         |                  |              |          |             |                    |          |           |         |     |          |
|---------|------------------|--------------|----------|-------------|--------------------|----------|-----------|---------|-----|----------|
| 2920085 | FLJ10159         | NM_018013    | 34.30177 | 0.332267149 | 0.79920862         | 0        | 9.1257922 | 5.0E-19 | 2.8 | 1.0E+00  |
| 3102204 | C8orf34          | NM_052958    | 17.00157 | 0.328519645 | 0.7132462          | 3.11E-15 | 7.1442662 | 5.6E-13 | 3.4 | 2.7E-41  |
| 2933331 | SNX9             | NM_016224    | 15.53029 | 0.328161585 | 0.74320445         | 0        | 6.6935258 | --      | --  | --       |
| 3874438 | <b>CDC25B</b>    | NM_004358    | 16.50665 | 0.323367084 | <b>-0.7824942</b>  | 8.43E-20 | 6.7863268 | 1.5E-14 | 1.7 | 2.6E-21  |
| 2326561 | <b>RPS6KA1</b>   | NM_001006665 | 14.42126 | 0.321373706 | <b>-0.73789909</b> | 1.07E-16 | 6.0751099 | 1.9E-25 | 1.4 | 3.4E-13  |
| 3844470 | <b>PPAP2C</b>    | NM_177526    | 20.81958 | 0.317923863 | <b>-0.75812776</b> | 5.07E-18 | 7.1266747 | 5.5E-29 | 1.5 | 3.7E-54  |
| 3928211 | <b>GRIK1</b>     | NM_175611    | 28.68129 | 0.317465568 | <b>-0.59850017</b> | 4.66E-10 | 5.9394535 | 2.1E-30 | 8.1 | 1.1E-165 |
| 3048363 | <b>PGAM2</b>     | NM_000290    | 18.3938  | 0.316865402 | <b>-0.66557007</b> | 8.27E-13 | 6.1792847 | 3.9E-32 | 1.9 | 1.1E-04  |
| 3661559 | <b>IRX5</b>      | NM_005853    | 16.63676 | 0.315319729 | <b>-0.64307738</b> | 8.24E-12 | 6.1905705 | 1.0E-20 | 2.2 | 1.2E-46  |
| 2350489 | KIAA1324         | NM_020775    | 27.98841 | 0.313076526 | 0.70400302         | 9.99E-15 | 7.3609142 | 1.5E-18 | 2.5 | 5.3E-75  |
| 2710895 | FGF12            | NM_004113    | 23.36692 | 0.308701521 | 0.77715559         | 0        | 8.3172518 | 3.8E-09 | 2.4 | 4.4E-07  |
| 3159483 | <b>ANKRD15</b>   | NM_153186    | 27.24684 | 0.307895957 | <b>-0.82615805</b> | 1.21E-23 | 5.9830698 | 3.4E-26 | 1.8 | 3.4E-46  |
| 2807195 | <b>FLJ39155</b>  | NM_152403    | 13.89932 | 0.305349558 | <b>-0.66446462</b> | 9.30E-13 | 4.898441  | 3.9E-26 | 1.9 | 7.3E-39  |
| 3751002 | <b>RAB34</b>     | NM_031934    | 19.44246 | 0.302205816 | <b>-0.77872419</b> | 1.64E-19 | 6.1114777 | 4.5E-22 | 2.0 | 7.4E-04  |
| 3757538 | <b>LOC201181</b> | NM_001013624 | 7.852589 | 0.302001679 | <b>-0.59617368</b> | 5.66E-10 | 5.4589689 | 6.2E-31 | 2.2 | 1.0E+00  |
| 3952360 | <b>LOC440792</b> | XM_496493    | 27.11049 | 0.297955884 | <b>-0.72072689</b> | 1.16E-15 | 6.0057308 | 1.3E-29 | 3.3 | 7.7E-60  |
| 2674845 | CAMKV            | NM_024046    | 11.33481 | 0.293742814 | 0.75887428         | 0        | 9.9252973 | 2.7E-20 | 4.9 | 3.9E-08  |
| 3278401 | FRMD4A           | NM_018027    | 20.88278 | 0.293441821 | 0.71351336         | 3.11E-15 | 8.6908774 | 4.1E-15 | 1.5 | 9.3E-127 |
| 3884266 | <b>NNAT</b>      | NM_005386    | 11.28807 | 0.283782442 | <b>-0.74313799</b> | 5.00E-17 | 11.861079 | 2.3E-12 | 1.6 | 4.3E-19  |
| 3406589 | <b>MGST1</b>     | NM_145791    | 28.54396 | 0.282291597 | <b>-0.69078508</b> | 4.91E-14 | 3.9888958 | 8.5E-29 | 2.1 | 2.6E-35  |
| 2945129 | <b>PRL</b>       | NM_000948    | 7.213509 | 0.276493336 | <b>-0.68010512</b> | 1.68E-13 | 4.5180969 | 4.0E-40 | 4.5 | 6.2E-14  |
| 2328936 | ZBTB8            | NM_144621    | 17.31765 | 0.276145421 | 0.73423479         | 2.22E-16 | 7.9764137 | 5.0E-05 | 1.4 | 5.5E-37  |
| 2364677 | PBX1             | NM_002585    | 12.03308 | 0.274354068 | 0.6202186          | 7.07E-11 | 10.438594 | 2.1E-14 | 2.3 | 6.6E-06  |
| 3634656 | <b>CHRNA3</b>    | NM_000743    | 12.61082 | 0.268590464 | <b>-0.84688808</b> | 7.29E-26 | 6.148791  | 3.2E-26 | 2.8 | 1.9E-15  |
| 2378180 | C1orf107         | NM_014388    | 35.63969 | 0.267898783 | 0.69894318         | 1.87E-14 | 7.880923  | 2.3E-08 | 1.4 | 1.2E-06  |
| 3302177 | <b>ARHGAP19</b>  | NM_032900    | 18.13869 | 0.267744294 | <b>-0.75315174</b> | 1.10E-17 | 5.5492813 | --      | --  | --       |
| 3059667 | <b>SEMA3D</b>    | NM_152754    | 11.57066 | 0.259753555 | <b>-0.67592293</b> | 2.68E-13 | 4.8516783 | --      | --  | --       |
| 2906872 | <b>MDFI</b>      | NM_005586    | 12.0294  | 0.256074404 | <b>-0.7860325</b>  | 4.45E-20 | 6.8905671 | 8.7E-22 | 2.8 | 1.8E-21  |
| 2882026 | <b>FAT2</b>      | NM_001447    | 8.313979 | 0.255457508 | <b>-0.78278446</b> | 8.01E-20 | 5.2330654 | 4.6E-54 | 3.2 | 1.1E-289 |
| 2520138 | FLJ20160         | NM_017694    | 8.969199 | 0.253433518 | 0.77135369         | 0        | 8.4540231 | 6.1E-09 | 1.9 | 2.4E-03  |
| 2959039 | KHDRBS2          | NM_152688    | 15.29528 | 0.253324866 | 0.77397866         | 0        | 8.5519469 | 1.0E-13 | 3.1 | 7.0E-21  |
| 2648378 | RAP2B            | NM_002886    | 18.28664 | 0.248738701 | 0.79420318         | 0        | 8.2979316 | 2.9E-06 | 1.4 | 7.0E-09  |
| 2595042 | ALS2CR4          | NM_152388    | 16.4109  | 0.247940363 | 0.70952534         | 4.88E-15 | 7.3900722 | 2.6E-02 | 1.3 | 9.0E-04  |
| 2634058 | FAM55C           | AY358207     | 13.14533 | 0.237770388 | 0.79743007         | 0        | 7.8484527 | 1.3E-05 | 1.4 | 9.7E-04  |
| 3940631 | ADRBK2           | NM_005160    | 11.45932 | 0.234165067 | 0.78216992         | 0        | 8.5363842 | 1.0E-10 | 2.4 | 9.0E-15  |
| 2877597 | LRRTM2           | NM_015564    | 14.78886 | 0.229511133 | 0.80662764         | 0        | 8.9868469 | --      | --  | --       |
| 2378369 | <b>HHAT</b>      | NM_018194    | 9.417575 | 0.225137534 | <b>-0.73199442</b> | 2.48E-16 | 5.646579  | 1.0E-27 | 1.6 | 1.1E-11  |
| 3944084 | <b>TOM1</b>      | NM_005488    | 37.21629 | 0.223196431 | <b>-0.66419736</b> | 9.57E-13 | 7.1335807 | 9.8E-21 | 1.7 | 1.0E-11  |
| 2812359 | NLN              | NM_020726    | 6.98295  | 0.220198217 | 0.60448275         | 2.81E-10 | 7.6789338 | 6.2E-11 | 2.2 | 2.4E-08  |
| 2424524 | DPYD             | NM_000110    | 18.42096 | 0.21644726  | 0.76788206         | 0        | 7.5169142 | --      | --  | --       |
| 3519624 | SLITRK1          | NM_052910    | 13.68865 | 0.214540189 | 0.69015676         | 5.28E-14 | 9.3395527 | 2.4E-16 | 2.9 | 3.2E-03  |
| 2672190 | LRRC2            | NM_024512    | 16.92978 | 0.212252914 | 0.73832601         | 0        | 4.8602801 | 2.9E-08 | 1.4 | 1.0E+00  |
| 2677723 | ARHGFE3          | NM_019555    | 8.620474 | 0.210396705 | 0.71893922         | 1.33E-15 | 7.3064691 | 5.0E-11 | 2.4 | 3.9E-30  |
| 3556888 | <b>RBM23</b>     | NM_018107    | 13.68423 | 0.207749365 | <b>-0.76765911</b> | 1.08E-18 | 8.5222094 | 5.5E-11 | 1.6 | 1.6E-04  |
| 3450861 | ABCD2            | NM_005164    | 9.451056 | 0.207021519 | 0.68122486         | 1.48E-13 | 7.0699975 | 3.7E-05 | 1.8 | 1.5E-08  |
| 2802696 | FLJ11127         | NM_019018    | 9.812265 | 0.200852888 | 0.68070604         | 1.57E-13 | 7.2932319 | 2.6E-07 | 2.0 | 3.8E-03  |
| 2705266 | TNIK             | NM_015028    | 8.293796 | 0.198874602 | 0.71065335         | 4.44E-15 | 9.1599724 | 1.1E-06 | 1.7 | 5.3E-09  |
| 2451261 | <b>DNM1DN3-4</b> | XM_372559    | 10.97476 | 0.196963585 | <b>-0.786405</b>   | 4.16E-20 | 6.2916623 | 1.8E-26 | 3.0 | 2.0E-11  |
| 2767710 | <b>KCTD8</b>     | NM_198353    | 10.76733 | 0.191980425 | <b>-0.80557764</b> | 1.04E-21 | 6.7804552 | 1.9E-24 | 2.9 | 5.6E-02  |
| 2983030 | AGPAT4           | NM_020133    | 13.54857 | 0.189604942 | 0.78156394         | 0        | 8.4724516 | 1.4E-04 | 1.5 | 5.1E-02  |
| 2484841 | B3GNT1           | NM_033252    | 8.393819 | 0.187324556 | 0.68122024         | 1.48E-13 | 7.6736976 | 5.6E-09 | 3.3 | 2.9E-06  |
| 3918779 | ITSN1            | NM_001001132 | 9.909122 | 0.184658247 | 0.74229887         | 0        | 8.860341  | 1.8E-08 | 1.5 | 2.3E-16  |
| 3473436 | <b>TSC</b>       | NM_017899    | 12.14572 | 0.184510153 | <b>-0.70101938</b> | 1.44E-14 | 5.6833862 | 4.1E-19 | 1.8 | 1.7E-04  |
| 2871617 | TRIM36           | NM_001017397 | 16.91661 | 0.183811049 | 0.62153221         | 6.28E-11 | 8.800348  | 1.5E-04 | 1.6 | 1.7E-08  |
| 3887479 | <b>EYA2</b>      | NM_172113    | 8.548467 | 0.1804495   | <b>-0.7830219</b>  | 7.67E-20 | 5.1808493 | 1.1E-29 | 1.4 | 1.6E-43  |
| 2942578 | LOC441130        | XM_499027    | 10.79031 | 0.177830665 | 0.71027874         | 4.44E-15 | 7.9966055 | 7.3E-07 | 2.0 | 7.4E-27  |
| 2859565 | <b>ADAMTS6</b>   | NM_197941    | 6.191553 | 0.177661199 | <b>-0.66187066</b> | 1.22E-12 | 5.3879115 | 1.2E-26 | 1.4 | 3.9E-55  |
| 2385873 | <b>KCNK1</b>     | NM_002245    | 5.299571 | 0.176454867 | <b>-0.58794632</b> | 1.11E-09 | 6.2324624 | 3.9E-32 | 3.7 | 9.1E-20  |
| 2783886 | <b>FLJ23191</b>  | NM_024574    | 6.721827 | 0.175642922 | <b>-0.58290514</b> | 1.66E-09 | 5.6006203 | 6.3E-26 | 6.5 | 9.2E-12  |
| 2849056 | DNAH5            | NM_001369    | 7.832369 | 0.175186956 | 0.7483084          | 0        | 4.8544574 | 1.8E-10 | 1.6 | 2.6E-06  |
| 3601051 | NEO1             | NM_002499    | 15.37812 | 0.172281112 | 0.62614912         | 4.12E-11 | 9.7839234 | 2.5E-15 | 2.4 | 3.2E-39  |
| 3850457 | <b>AP1M2</b>     | NM_005498    | 8.125885 | 0.17059922  | <b>-0.75557238</b> | 7.58E-18 | 5.2578742 | 4.9E-14 | 1.6 | 4.3E-19  |
| 3356115 | <b>APLP2</b>     | NM_001642    | 19.40664 | 0.167362592 | <b>-0.64408562</b> | 7.46E-12 | 9.9677139 | 4.5E-10 | 2.1 | 2.6E-14  |
| 3182310 | LOC392374        | XM_498337    | 6.391648 | 0.165231109 | 0.6691288          | 5.64E-13 | 8.996396  | 1.7E-12 | 2.7 | 3.3E-06  |
| 3994231 | AFF2             | NM_002025    | 7.341759 | 0.164031738 | 0.51167153         | 2.55E-07 | 8.7016192 | 1.3E-15 | 2.5 | 1.6E-16  |
| 2850272 | FLJ34047         | NM_173669    | 9.970742 | 0.163526811 | 0.77691832         | 0        | 7.7012695 | 4.4E-09 | 1.6 | 8.2E-02  |
| 3130757 | <b>FUT10</b>     | NM_032664    | 12.58926 | 0.163451914 | <b>-0.74791004</b> | 2.46E-17 | 5.9635808 | 3.3E-17 | 1.9 | 3.8E-26  |
| 2799758 | <b>IRX1</b>      | NM_024337    | 17.13284 | 0.16115229  | <b>-0.64225862</b> | 8.92E-12 | 6.3458058 | 6.5E-27 | 4.0 | 2.4E-09  |
| 2888385 | KIAA1893         | NM_052899    | 18.52759 | 0.159018769 | 0.63107779         | 2.60E-11 | 8.6645383 | 1.9E-11 | 1.9 | 1.9E-10  |
| 2452667 | RAB7L1           | NM_003929    | 7.041188 | 0.155985991 | 0.7307952          | 4.44E-16 | 6.5505778 | 6.1E-09 | 1.8 | 1.3E-06  |
| 3371003 | TP53I11          | NM_006034    | 35.19213 | 0.155167332 | 0.73093441         | 4.44E-16 | 8.3724163 | 4.9E-14 | 2.1 | 3.5E-17  |
| 2623308 | GRM2             | NM_000839    | 11.333   | 0.153625353 | 0.70567419         | 7.99E-15 | 7.6977349 | 1.9E-10 | 1.8 | 5.8E-01  |
| 3790982 | <b>CDH20</b>     | NM_031891    | 6.310092 | 0.149745589 | <b>-0.64246596</b> | 8.75E-12 | 6.8099833 | 5.0E-17 | 3.9 | 6.8E-21  |
| 3775808 | <b>CLUL1</b>     | NM_014410    | 9.192165 | 0.149544154 | <b>-0.59486586</b> | 6.31E-10 | 4.9848386 | 1.0E-21 | 2.6 | 1.5E-37  |
| 2931090 | FLJ39616         | NM_016534    | 5.042212 | 0.14909125  | 0.58425459         | 1.49E-09 | 7.8556414 | 1.6E-08 | 2.9 | 1.4E-07  |
| 3512948 | <b>C13orf18</b>  | NM_025113    | 5.584081 | 0.149058559 | <b>-0.51723573</b> | 1.79E-07 | 5.1106616 | 3.8E-21 | 2.2 | 1.8E-24  |
| 2958172 | <b>BMP5</b>      | NM_021073    | 11.46032 | 0.144391073 | <b>-0.67189201</b> | 4.18E-13 | 4.1529952 | 2.9E-21 | 2.1 | 7.8E-05  |
| 3279698 | <b>CUBN</b>      | NM_001081    | 8.813481 | 0.143104325 | <b>-0.70007221</b> | 1.61E-14 | 4.9435054 | 4.2E-24 | 2.3 | 0.0E+00  |
| 2602653 | FLJ20701         | NM_017933    | 8.751161 | 0.142907389 | 0.67712672         | 2.35E-13 | 6.8627995 | 4.0E-07 | 1.7 | 4.2E-04  |



|         |               |              |          |             |             |          |           |         |      |         |
|---------|---------------|--------------|----------|-------------|-------------|----------|-----------|---------|------|---------|
| 2375144 | LGR6          | NM_021636    | 10.62413 | 0.142641837 | -0.61315188 | 1.33E-10 | 5.2348495 | 8.3E-19 | 1.6  | 3.4E-02 |
| 3274361 | KLF6          | NM_001300    | 5.947878 | 0.141156124 | 0.61153668  | 1.53E-10 | 8.2042432 | 7.1E-16 | 3.4  | 5.8E-26 |
| 3173508 | LOC389753     | XM_372112    | 6.028921 | 0.140993198 | -0.6385763  | 1.28E-11 | 4.4683193 | 8.1E-29 | 2.4  | 5.6E-22 |
| 2378662 | TRAF5         | NM_004619    | 5.378718 | 0.13732319  | 0.60430116  | 2.86E-10 | 5.7607089 | 1.1E-04 | 1.5  | 3.1E-02 |
| 3239584 | MYO3A         | NM_017433    | 19.44872 | 0.136282085 | -0.60409877 | 2.91E-10 | 4.1552164 | 3.8E-10 | 1.6  | 1.5E-20 |
| 2712906 | RNF168        | NM_152617    | 21.64438 | 0.135829582 | 0.69841421  | 1.98E-14 | 7.8998145 | --      | --   | --      |
| 2694001 | MGLL          | NM_001003794 | 7.90813  | 0.134001734 | 0.72703647  | 4.44E-16 | 8.0456676 | 2.8E-08 | 2.1  | 1.5E-13 |
| 4021633 | COVA1         | NM_006375    | 4.973571 | 0.129793061 | -0.62559688 | 4.33E-11 | 5.8287006 | 1.6E-18 | 1.7  | 1.8E-15 |
| 2486178 | MEIS1         | NM_002398    | 4.537565 | 0.125389002 | -0.66787419 | 6.46E-13 | 6.9693271 | 4.2E-36 | 10.9 | 1.1E-93 |
| 2787005 | CLGN          | NM_004362    | 12.05248 | 0.124901032 | -0.61156868 | 1.52E-10 | 4.4172695 | 3.3E-10 | 1.5  | 6.8E-10 |
| 2731636 | DKFZP564O0823 | NM_015393    | 4.024801 | 0.123073069 | -0.57946874 | 2.18E-09 | 6.6310987 | 1.9E-24 | 5.0  | 3.1E-12 |
| 3941848 | EMID1         | NM_133455    | 12.9141  | 0.11925071  | 0.68473291  | 9.93E-14 | 7.6724027 | 8.4E-15 | 1.6  | 4.4E-10 |
| 2340961 | IL12RB2       | NM_001559    | 4.032672 | 0.117260831 | 0.64185113  | 9.29E-12 | 5.6238126 | 3.4E-09 | 3.4  | 6.1E-04 |
| 3293998 | CBARA1        | NM_006077    | 6.556557 | 0.11406699  | 0.66357172  | 1.02E-12 | 8.3372    | 5.9E-09 | 1.6  | 5.1E-06 |
| 2775965 | COQ2          | NM_015697    | 5.228801 | 0.113679622 | -0.5014283  | 4.80E-07 | 7.7403022 | 2.4E-11 | 1.9  | 1.6E-02 |
| 2995076 | LOC400949     | XM_376048    | 7.991087 | 0.11330266  | 0.65075064  | 3.84E-12 | 7.969161  | 1.1E-04 | 1.8  | 8.9E-03 |
| 2775735 | SCD5          | NM_024906    | 7.846788 | 0.111905362 | 0.69905681  | 1.82E-14 | 9.0710962 | 5.8E-07 | 1.4  | 7.1E-05 |
| 3005684 | KCTD7         | NM_153033    | 6.449313 | 0.107630722 | 0.68604855  | 8.53E-14 | 8.5321141 | --      | --   | --      |
| 3644191 | FAHD1         | NM_001018104 | 3.874379 | 0.106275017 | 0.58857828  | 1.05E-09 | 7.3429728 | 4.8E-05 | 1.7  | 2.1E-02 |
| 3863547 | ERF           | NM_006494    | 7.339447 | 0.103432885 | -0.60984127 | 1.77E-10 | 6.6236953 | 1.5E-18 | 2.5  | 2.3E-11 |
| 2365958 | MPZL1         | NM_024569    | 6.666266 | 0.102855571 | 0.67851168  | 2.01E-13 | 8.025481  | 1.0E-01 | 1.3  | 7.1E-10 |
| 3740770 | RTN4RL1       | NM_178568    | 6.004279 | 0.101996657 | 0.60460161  | 2.78E-10 | 7.1551473 | --      | --   | --      |
| 3304853 | SH3MD1        | NM_014631    | 4.137953 | 0.101190754 | 0.62050934  | 6.88E-11 | 7.253049  | 2.3E-08 | 1.6  | 4.4E-07 |
| 3610110 | NR2F2         | NM_021005    | 6.958229 | 0.100620595 | -0.49563184 | 6.80E-07 | 8.3622525 | 1.4E-12 | 4.3  | 2.5E-03 |
| 3410056 | ---           | ---          | 6.243037 | 0.097091392 | -0.64537101 | 6.57E-12 | 7.904347  | --      | --   | --      |
| 2709414 | FLJ10560      | NM_018138    | 9.766375 | 0.095714266 | 0.67260058  | 3.87E-13 | 7.5340436 | 4.0E-05 | 1.5  | 1.1E-02 |
| 3104489 | STMN2         | NM_007029    | 4.255397 | 0.092904919 | 0.63654005  | 1.55E-11 | 13.160423 | --      | --   | --      |
| 3782088 | CABYR         | NM_153769    | 5.462203 | 0.091075362 | 0.62754603  | 3.62E-11 | 6.6764658 | 1.2E-10 | 1.8  | 3.9E-09 |
| 3935243 | LSS           | NM_001001438 | 2.762378 | 0.09104055  | 0.53508162  | 5.53E-08 | 8.6664747 | 6.8E-12 | 1.6  | 1.1E-15 |
| 3181600 | GALNT12       | NM_024642    | 2.650028 | 0.08681959  | -0.59031516 | 9.16E-10 | 5.0617152 | 7.7E-19 | 1.5  | 5.4E-02 |
| 3858659 | ANKRD27       | NM_032139    | 4.481146 | 0.086046147 | 0.66825163  | 6.21E-13 | 7.7385935 | 1.9E-04 | 1.4  | 1.0E+00 |
| 3482572 | LOC402677     | XM_380021    | 6.498202 | 0.084038014 | -0.59816426 | 4.80E-10 | 7.6872148 | 2.9E-12 | 2.0  | 1.0E-11 |
| 2542795 | SDC1          | NM_002997    | 3.779288 | 0.081864894 | -0.47410308 | 2.36E-06 | 6.8062337 | 7.3E-21 | 2.1  | 3.3E-06 |
| 2602770 | DNER          | NM_139072    | 8.692056 | 0.078407529 | -0.48583132 | 1.21E-06 | 10.177621 | 1.1E-07 | 2.0  | 6.4E-04 |
| 3286792 | C10orf25      | XM_499566    | 2.857478 | 0.075357029 | -0.49956262 | 5.37E-07 | 5.9404514 | 1.7E-15 | 1.8  | 2.4E-02 |
| 2405250 | FNDC5         | NM_153756    | 5.832797 | 0.068384333 | -0.45123053 | 8.06E-06 | 6.2953137 | 7.2E-17 | 1.7  | 4.9E-19 |
| 2413907 | DHCR24        | NM_014762    | 3.322157 | 0.061389211 | 0.61964256  | 7.44E-11 | 9.1957985 | 4.2E-07 | 1.5  | 1.1E-03 |
| 2828146 | LOC389300     | XM_374124    | 3.175368 | 0.059768065 | 0.59506761  | 6.20E-10 | 9.8273196 | --      | --   | --      |
| 2823551 | MAN2A1        | NM_002372    | 2.461897 | 0.05285523  | 0.42489326  | 2.99E-05 | 7.4481787 | 1.7E-04 | 2.2  | 2.1E-10 |
| 2598496 | DSU           | NM_018000    | 1.528113 | 0.048498637 | -0.58421285 | 1.50E-09 | 5.8097732 | 1.2E-22 | 2.0  | 7.0E-17 |
| 2783207 | PRSS12        | NM_003619    | 1.077517 | 0.047796056 | 0.52688934  | 9.57E-08 | 8.3670005 | 4.1E-19 | 6.9  | 1.8E-84 |
| 3401994 | KCNA1         | NM_000217    | 1.421325 | 0.047176877 | -0.52414226 | 1.15E-07 | 6.6249779 | --      | --   | --      |
| 3777770 | FLJ11996      | AK022058     | 2.082896 | 0.045665449 | -0.66941307 | 5.48E-13 | 3.5668406 | --      | --   | --      |
| 2908154 | C6orf206      | NM_152732    | 1.627278 | 0.043680063 | 0.5593522   | 1.00E-08 | 6.9847928 | 3.3E-11 | 2.5  | 3.1E-01 |
| 3216276 | SLC35D2       | NM_007001    | 8.424273 | 0.041673182 | -0.52442198 | 1.13E-07 | 4.4615185 | 1.5E-08 | 1.4  | 1.0E+00 |
| 3959862 | PVALB         | NM_002854    | 1.066777 | 0.034595229 | -0.51008204 | 2.82E-07 | 3.4921684 | 6.7E-17 | 2.1  | 1.0E+00 |

Table S16. M31 (blue): THM module

| Transcript ID | Symbol        | Accession    | kTotal   | kWithin-Connectivity | eigencorr    | eigenpval | 5-region ANOVA |         |          |          | Wnt pathway annotation (GO BP & KEGG) |
|---------------|---------------|--------------|----------|----------------------|--------------|-----------|----------------|---------|----------|----------|---------------------------------------|
|               |               |              |          |                      |              |           | meanExpr       | DEX     | FoldChng | DAS      |                                       |
| 2412624       | RAB3B         | NM_002867    | 64.85134 | 1                    | 0.949528159  | 0         | 7.2130083      | 1.8E-28 | 6.6      | 3.5E-03  |                                       |
| 3551432       | CYP46A1       | NM_006668    | 55.33464 | 0.978693187          | 0.950406279  | 0         | 6.8601692      | 8.2E-27 | 3.1      | 6.4E-34  |                                       |
| 3887241       | SLC12A5       | NM_020708    | 53.36313 | 0.925832658          | 0.931945701  | 0         | 7.0608292      | 1.8E-22 | 2.6      | 5.6E-18  |                                       |
| 2609824       | LOC151835     | NM_153635    | 37.56104 | 0.855165212          | 0.851306144  | 0         | 5.3777843      | 4.2E-50 | 4.7      | 2.8E-182 |                                       |
| 3758291       | VAT1          | NM_006373    | 40.85845 | 0.829435495          | 0.891667688  | 0         | 9.5365392      | 2.6E-28 | 3.1      | 5.8E-01  |                                       |
| 3264621       | TCF7L2        | NM_030756    | 42.69779 | 0.780099218          | 0.873298808  | 0         | 6.4276869      | 1.5E-57 | 45.6     | 3.7E-198 | Y (both)                              |
| 3441542       | LOC401089     | XM_376269    | 58.78571 | 0.761200783          | 0.929514364  | 0         | 5.6353099      | 2.6E-40 | 3.7      | 2.5E-138 |                                       |
| 2783596       | PDE5A         | NM_001083    | 41.22991 | 0.745912693          | 0.898980324  | 0         | 5.568582       | 2.4E-42 | 6.3      | 9.4E-231 |                                       |
| 2717253       | SORCS2        | NM_020777    | 36.44985 | 0.731938344          | 0.876604308  | 0         | 7.1646148      | 1.2E-32 | 3.1      | 2.2E-91  |                                       |
| 3193725       | OLFM1         | NM_006334    | 30.01394 | 0.72844336           | 0.871278685  | 0         | 8.3574831      | 3.6E-29 | 6.7      | 2.5E-71  |                                       |
| 3661718       | LJL20481      | NM_017839    | 78.11342 | 0.717103483          | 0.903174295  | 0         | 5.0436745      | 5.6E-36 | 5.2      | 1.8E-77  |                                       |
| 3815045       | LOC388097     | XM_370845    | 40.19309 | 0.710389819          | 0.923557819  | 0         | 6.8869503      | 1.1E-23 | 3.3      | 2.9E-09  |                                       |
| 3219788       | EPB41L4B      | NM_019114    | 43.98602 | 0.708494766          | 0.897870152  | 0         | 5.9582434      | 3.5E-42 | 6.2      | 6.3E-222 |                                       |
| 2732844       | ANXA3         | NM_005139    | 47.51286 | 0.697130699          | 0.867954974  | 0         | 4.0686528      | 1.2E-42 | 6.3      | 3.0E-62  |                                       |
| 3363266       | DKK3          | NM_015881    | 40.5792  | 0.694751077          | 0.899142181  | 0         | 9.7361851      | 1.1E-26 | 2.3      | 1.5E-24  | Y (GO BP)                             |
| 2615060       | RBMS3         | NM_001003792 | 47.16364 | 0.686394665          | 0.87525001   | 0         | 5.7255645      | 2.5E-36 | 5.0      | 2.5E-78  |                                       |
| 3064361       | ACHE          | NM_000665    | 34.21606 | 0.655944992          | 0.893683791  | 0         | 6.9921884      | 1.5E-24 | 2.6      | 6.0E-61  |                                       |
| 2404209       | SDC3          | NM_014654    | 36.09036 | 0.653412398          | 0.878944778  | 0         | 9.2429866      | 9.0E-15 | 2.8      | 1.8E-05  |                                       |
| 3302572       | CRTAC1        | NM_018058    | 25.97271 | 0.651137737          | 0.80451594   | 0         | 6.9369106      | 2.5E-40 | 8.1      | 1.4E-187 |                                       |
| 2703462       | ADMP          | NM_145035    | 28.00957 | 0.630372085          | 0.884256022  | 0         | 6.0636153      | 2.0E-28 | 2.5      | 9.1E-38  |                                       |
| 3766153       | CYB561        | NM_001915    | 34.1599  | 0.625194027          | 0.896712263  | 0         | 7.2875198      | 1.0E-18 | 2.5      | 4.0E-02  |                                       |
| 3961068       | PDGFB         | NM_002608    | 38.87129 | 0.610521226          | 0.865195545  | 0         | 6.0351573      | 5.1E-32 | 2.2      | 2.6E-33  |                                       |
| 2787459       | INPP4B        | NM_003866    | 52.52216 | 0.604795762          | 0.888571369  | 0         | 5.1773794      | 3.8E-31 | 3.6      | 3.2E-110 |                                       |
| 2810805       | RAB3C         | NM_138453    | 35.40429 | 0.602788731          | 0.871622388  | 0         | 9.3209858      | 2.1E-22 | 4.6      | 1.3E-04  |                                       |
| 2655845       | EPHB3         | NM_004443    | 44.37533 | 0.59881207           | 0.865236011  | 0         | 6.2368003      | 1.2E-35 | 2.1      | 2.8E-41  |                                       |
| 3901191       | NAPB          | NM_022080    | 34.94867 | 0.586759417          | 0.851009289  | 0         | 9.1055549      | 1.9E-11 | 2.4      | 1.5E-03  |                                       |
| 2585476       | SCN7A         | NM_002976    | 26.51115 | 0.584774678          | 0.865189469  | 0         | 3.8129908      | 4.8E-34 | 2.8      | 1.3E-152 |                                       |
| 3468345       | IGF1          | NM_000618    | 32.04182 | 0.584044939          | 0.862991063  | 0         | 7.3169857      | 7.4E-17 | 2.6      | 5.1E-11  |                                       |
| 2567647       | CREG2         | NM_153836    | 26.97016 | 0.577648687          | 0.848592293  | 0         | 6.8911393      | 5.1E-22 | 4.4      | 1.3E-04  |                                       |
| 2475911       | EHD3          | NM_014600    | 37.72395 | 0.573522249          | 0.879130213  | 0         | 7.4658592      | 1.0E-18 | 1.9      | 2.1E-06  |                                       |
| 2584520       | FIGN          | NM_018086    | 33.73207 | 0.573103625          | 0.839443977  | 0         | 5.7210713      | --      | --       | --       |                                       |
| 3721989       | CNTNAP1       | NM_003632    | 28.6406  | 0.55956079           | 0.836965205  | 0         | 6.4478523      | 1.6E-19 | 3.1      | 2.3E-80  |                                       |
| 3023483       | FAM40B        | NM_020704    | 33.43771 | 0.555678879          | 0.567975763  | 5.27E-09  | 5.4923108      | 6.8E-52 | 22.3     | 5.7E-241 |                                       |
| 3302990       | GOT1          | NM_002079    | 56.58422 | 0.554680825          | 0.887202639  | 0         | 8.6037036      | 1.0E-24 | 2.7      | 4.3E-06  |                                       |
| 3601486       | KIAA1465      | NM_020851    | 29.39298 | 0.553324595          | -0.839467204 | 4.94E-25  | 9.6847888      | 2.3E-34 | 8.2      | 8.6E-74  |                                       |
| 3456353       | CALCOCO1      | NM_020898    | 33.71585 | 0.55197694           | -0.884845203 | 6.15E-31  | 8.0824198      | 5.5E-14 | 1.6      | 1.1E-02  | Y (GO BP)                             |
| 3396003       | CSE-C         | NM_170601    | 42.03589 | 0.55121315           | 0.868841311  | 0         | 6.1826866      | 6.2E-18 | 2.5      | 4.0E-44  |                                       |
| 3021009       | KCND2         | NM_012281    | 40.90059 | 0.541400131          | 0.852814517  | 0         | 8.4256291      | 1.5E-19 | 3.5      | 1.1E-02  |                                       |
| 3403015       | ENO2          | NM_001975    | 29.62428 | 0.540994332          | 0.837196723  | 0         | 10.48028       | 1.3E-14 | 1.9      | 3.0E-01  |                                       |
| 2349863       | NTNG1         | NM_014917    | 21.75976 | 0.539351149          | 0.840948081  | 0         | 7.1738229      | 3.9E-33 | 18.5     | 8.3E-77  |                                       |
| 3351975       | ABCG4         | NM_022169    | 28.83291 | 0.538370341          | 0.877215072  | 0         | 6.9320251      | 7.2E-22 | 2.3      | 1.1E-16  |                                       |
| 3132616       | ZMAT4         | NM_024645    | 34.16719 | 0.530083891          | 0.80568205   | 0         | 6.4702964      | 3.6E-47 | 8.4      | 2.9E-72  |                                       |
| 3933331       | C21orf25      | NM_199050    | 31.44043 | 0.529285747          | 0.87255202   | 0         | 6.5530801      | 1.3E-23 | 2.6      | 1.8E-34  |                                       |
| 3660075       | NKD1          | NM_033119    | 59.17877 | 0.528946749          | 0.83868613   | 0         | 6.4747469      | 7.6E-40 | 2.6      | 4.0E-46  | Y (both)                              |
| 3605739       | ZSCAN2        | NM_017894    | 42.66904 | 0.52668908           | -0.865237035 | 4.01E-28  | 6.6663485      | 1.9E-17 | 2.0      | 2.0E-16  |                                       |
| 3029030       | CASP2         | NM_032984    | 31.77742 | 0.524829538          | -0.890746261 | 6.93E-32  | 7.98036        | 5.4E-11 | 1.7      | 5.8E-08  |                                       |
| 3131881       | PPAPDC1B      | NM_032483    | 45.95118 | 0.52288556           | -0.870835857 | 7.03E-29  | 8.0287295      | 3.3E-22 | 2.4      | 1.5E-14  |                                       |
| 3934669       | SUMO3         | NM_006936    | 25.2626  | 0.522218037          | 0.849184868  | 0         | 9.2311127      | 1.8E-10 | 1.8      | 7.5E-04  |                                       |
| 3566176       | OTX2          | NM_021728    | 47.47685 | 0.517029748          | 0.830757475  | 0         | 5.5702483      | 5.1E-50 | 12.8     | 2.8E-68  |                                       |
| 3789976       | RAB27B        | NM_004163    | 26.30356 | 0.513754218          | 0.824777055  | 0         | 7.1334399      | 2.2E-15 | 4.1      | 1.4E-17  |                                       |
| 4002081       | FLJ14503      | NM_152780    | 30.62564 | 0.506126104          | 0.852786579  | 0         | 7.4050736      | 4.5E-16 | 1.9      | 5.4E-06  |                                       |
| 2644619       | FAM62C        | NM_031913    | 29.35545 | 0.505895404          | 0.867563443  | 0         | 5.3232759      | 5.3E-33 | 1.7      | 2.6E-25  |                                       |
| 3071063       | GRM8          | NM_000845    | 39.76122 | 0.502288302          | 0.856969546  | 0         | 5.9594864      | 2.3E-31 | 3.2      | 9.1E-42  |                                       |
| 2379665       | PROX1         | NM_002763    | 24.92466 | 0.500241433          | 0.845890182  | 0         | 6.4874188      | 3.9E-27 | 8.2      | 1.9E-16  |                                       |
| 3667508       | CALB2         | NM_007088    | 21.9332  | 0.498391619          | 0.859957448  | 0         | 8.3161759      | 1.7E-29 | 13.5     | 1.7E-01  |                                       |
| 3543481       | PSEN1         | NM_000021    | 29.43334 | 0.498111865          | -0.88133087  | 2.13E-30  | 8.8925355      | 7.5E-07 | 1.4      | 2.9E-05  | Y (KEGG)                              |
| 2333907       | C1orf164      | NM_018150    | 18.67823 | 0.491657359          | 0.758146752  | 0         | 8.0738352      | 7.9E-43 | 2.9      | 0.0E+00  |                                       |
| 3591459       | MAP1A         | NM_002373    | 30.03271 | 0.491429865          | 0.821508615  | 0         | 8.0664559      | 4.4E-10 | 2.8      | 7.2E-13  |                                       |
| 3375396       | SYT7          | NM_004200    | 20.7675  | 0.489411992          | 0.76438148   | 0         | 7.7665857      | 9.2E-29 | 3.4      | 2.2E-09  |                                       |
| 3375862       | MTA2          | NM_004739    | 21.01068 | 0.489095485          | -0.831584846 | 3.40E-24  | 8.7680631      | 5.3E-09 | 1.7      | 2.0E-06  |                                       |
| 3724197       | NSF           | NM_006178    | 33.39382 | 0.488607229          | 0.864332884  | 0         | 8.8740379      | 1.3E-15 | 2.5      | 4.3E-01  |                                       |
| 2373693       | LHX9          | NM_001014434 | 18.14622 | 0.48564921           | 0.764066157  | 0         | 5.9285038      | 3.5E-51 | 14.7     | 6.2E-53  |                                       |
| 3796428       | MYOM1         | NM_003803    | 29.41262 | 0.484141189          | 0.828694398  | 0         | 5.0496629      | 3.3E-25 | 3.0      | 1.2E-51  |                                       |
| 3063685       | MCM7          | NM_182776    | 25.15691 | 0.470319042          | -0.842034588 | 2.58E-25  | 8.2920259      | 2.5E-11 | 2.3      | 7.4E-24  |                                       |
| 2937144       | SMOC2         | NM_022138    | 17.99994 | 0.465144308          | 0.441776282  | 1.31E-05  | 5.0147822      | 1.1E-36 | 5.2      | 1.0E-59  |                                       |
| 2447148       | RG516         | NM_002928    | 29.68469 | 0.459185973          | 0.78578117   | 0         | 6.4837455      | 1.6E-34 | 4.1      | 5.5E-38  |                                       |
| 3063646       | ZNF3          | NM_032924    | 23.50771 | 0.456798291          | -0.861708077 | 1.16E-27  | 7.8092057      | 5.7E-06 | 1.4      | 4.7E-05  |                                       |
| 3663287       | NDRG4         | NM_020465    | 26.05487 | 0.456109521          | 0.844653095  | 0         | 8.89882        | 8.6E-13 | 2.3      | 1.5E-12  |                                       |
| 2781138       | LEF1          | NM_016269    | 24.48163 | 0.455635624          | 0.809624775  | 0         | 5.990788       | 1.5E-37 | 6.3      | 1.0E-79  | Y (both)                              |
| 2675628       | VprBP         | NM_014703    | 51.53707 | 0.453575183          | -0.855008914 | 7.96E-27  | 7.9937802      | 3.9E-08 | 1.4      | 4.2E-12  |                                       |
| 3098935       | NCOA6IP       | NM_024831    | 51.48942 | 0.450341085          | -0.832807139 | 2.54E-24  | 7.4193474      | 1.1E-05 | 1.5      | 1.3E-01  |                                       |
| 2931569       | AKAP12        | NM_005100    | 22.54262 | 0.450097792          | 0.800105891  | 0         | 7.4610019      | 3.5E-29 | 4.6      | 2.7E-106 |                                       |
| 2624291       | PRKCD         | NM_006254    | 30.48101 | 0.447836557          | 0.879701976  | 0         | 6.4969615      | 2.4E-24 | 2.4      | 1.6E-42  |                                       |
| 3862167       | FBL           | NM_001436    | 23.27072 | 0.446956312          | -0.771795502 | 5.42E-19  | 9.4685898      | 4.9E-10 | 2.3      | 7.1E-04  |                                       |
| 2401849       | LOC90529      | NM_178122    | 23.99885 | 0.444741178          | 0.828536931  | 0         | 5.8454725      | 8.3E-23 | 3.7      | 1.2E-57  |                                       |
| 3218151       | GRIN3A        | NM_133445    | 21.19771 | 0.443519696          | 0.82675195   | 0         | 6.6660504      | 9.0E-21 | 6.1      | 1.5E-06  |                                       |
| 3620276       | EHD4          | NM_139265    | 24.60561 | 0.442361104          | 0.784498743  | 0         | 6.0506299      | 2.3E-31 | 1.7      | 3.1E-16  |                                       |
| 3063035       | DKFZp761L1417 | NM_152913    | 29.15066 | 0.441183867          | 0.844358413  | 0         | 7.9698112      | 2.1E-12 | 2.0      | 1.0E-02  |                                       |
| 2327603       | GMEB1         | NM_006582    | 40.25292 | 0.43902622           | -0.856549993 | 5.15E-27  | 7.7220641      | 1.1E-09 | 1.6      | 6.4E-06  |                                       |
| 3847225       | PLAC2         | NM_153375    | 19.64483 | 0.438379022          | 0.779352085  | 0         | 6.159068       | --      | --       | --       |                                       |

|         |           |              |          |             |              |          |           |         |      |          |
|---------|-----------|--------------|----------|-------------|--------------|----------|-----------|---------|------|----------|
| 3740304 | PITPNA    | NM_006224    | 29.30431 | 0.435742886 | 0.820777547  | 0        | 9.3832237 | 1.4E-07 | 1.7  | 6.5E-01  |
| 2348962 | GPR88     | NM_022049    | 15.33203 | 0.433085292 | 0.421199862  | 3.56E-05 | 6.9725544 | 7.6E-43 | 14.8 | 7.2E-86  |
| 3304215 | LDB1      | NM_003893    | 18.11174 | 0.431954972 | -0.757182208 | 5.89E-18 | 9.9844313 | 1.7E-13 | 1.7  | 7.1E-06  |
| 2923868 | PKIB      | NM_181795    | 19.05392 | 0.430704859 | 0.826643424  | 0        | 4.5843876 | 4.3E-31 | 1.1  | 6.7E-74  |
| 2696764 | RNF184    | NM_018133    | 21.48977 | 0.428505386 | -0.823306601 | 2.32E-23 | 10.204642 | 5.1E-09 | 1.6  | 1.0E+00  |
| 3844238 | TRIM28    | NM_005762    | 19.91042 | 0.427055903 | -0.75198922  | 1.32E-17 | 9.7838092 | 2.0E-11 | 1.7  | 3.0E-05  |
| 3678462 | PPL       | NM_002705    | 21.16893 | 0.42252087  | 0.765926789  | 0        | 5.5842742 | 9.7E-29 | 1.5  | 2.2E-53  |
| 3347939 | LOC399947 | NM_207645    | 22.38953 | 0.422286717 | 0.840530283  | 0        | 8.7869311 | 1.5E-12 | 4.0  | 1.1E-02  |
| 2542816 | PUM2      | NM_015317    | 49.83554 | 0.42126476  | -0.813197188 | 2.13E-22 | 10.007214 | 7.2E-08 | 1.6  | 6.6E-04  |
| 3192653 | GTF3C5    | NM_012087    | 20.43723 | 0.419225587 | -0.808287628 | 5.95E-22 | 7.7439915 | 1.7E-05 | 1.2  | 4.8E-01  |
| 3315181 | DRD11P    | NM_015722    | 26.36492 | 0.41742752  | 0.850176451  | 0        | 7.8351176 | --      | --   | --       |
| 2382970 | EPHX1     | NM_000120    | 20.5061  | 0.41593191  | 0.806926756  | 0        | 6.6321084 | 2.5E-22 | 2.5  | 1.4E-22  |
| 4007899 | SYP       | NM_003179    | 23.54654 | 0.413058505 | 0.841062298  | 0        | 9.8130252 | --      | --   | --       |
| 2353337 | SLC22A15  | NM_018420    | 27.51051 | 0.412533025 | 0.799768444  | 0        | 6.393181  | 5.8E-15 | 2.0  | 6.0E-09  |
| 2983142 | LOC440144 | XM_498565    | 23.29342 | 0.412416893 | 0.872357147  | 0        | 6.6870545 | 7.7E-23 | 1.9  | 3.0E-10  |
| 3836841 | CALM3     | NM_005184    | 23.9385  | 0.410626678 | 0.803659695  | 0        | 11.686408 | 1.1E-06 | 1.6  | 2.4E-07  |
| 3887165 | C20orf67  | NM_022104    | 29.30632 | 0.409603306 | -0.784125935 | 6.29E-20 | 7.7422813 | 2.2E-08 | 1.3  | 3.1E-03  |
| 2835386 | SLC6A7    | NM_014228    | 31.55682 | 0.407234513 | 0.857515473  | 0        | 6.630912  | 1.7E-30 | 2.9  | 3.1E-42  |
| 3867400 | FUT1      | NM_000148    | 21.06346 | 0.405486625 | 0.791571341  | 0        | 5.9411941 | 1.1E-33 | 3.3  | 3.8E-09  |
| 2698996 | PCOLCE2   | NM_013363    | 20.01871 | 0.397582228 | 0.84528737   | 0        | 5.5044214 | 4.9E-25 | 3.8  | 2.6E-61  |
| 2334847 | DMBX1     | NM_172225    | 14.88031 | 0.393097055 | 0.721446798  | 8.88E-16 | 6.0694701 | 1.4E-34 | 3.4  | 1.3E-05  |
| 2930243 | SASH1     | NM_015278    | 18.55868 | 0.393085681 | 0.816301709  | 0        | 6.399197  | 1.9E-19 | 2.1  | 4.8E-15  |
| 2451309 | JARID1B   | NM_006618    | 28.90315 | 0.392519547 | -0.822833969 | 2.59E-23 | 9.4448409 | 2.2E-06 | 1.5  | 1.0E-14  |
| 3914050 | STMN3     | NM_015894    | 29.68406 | 0.392352444 | 0.833598133  | 0        | 8.9560284 | 4.0E-15 | 2.3  | 6.8E-04  |
| 3437500 | FLJ31978  | NM_144669    | 21.23327 | 0.390809876 | 0.83859321   | 0        | 7.7622523 | 5.4E-15 | 2.1  | 3.4E-03  |
| 3603295 | CRABP1    | NM_004378    | 34.35201 | 0.389461421 | 0.613787795  | 1.25E-10 | 6.4096487 | 1.7E-41 | 18.3 | 1.0E-81  |
| 3875179 | CHGB      | NM_001819    | 17.32515 | 0.387201645 | 0.768164239  | 0        | 8.0070183 | 2.2E-20 | 3.0  | 1.1E-05  |
| 3444216 | STYK1     | NM_018423    | 18.17198 | 0.386808161 | 0.822147283  | 0        | 5.206374  | 3.4E-23 | 2.9  | 1.8E-42  |
| 3450362 | SYT10     | NM_198992    | 18.91922 | 0.382882545 | 0.431450139  | 2.18E-05 | 5.1283792 | 1.3E-39 | 5.6  | 1.4E-64  |
| 3665501 | HSD11B2   | NM_000196    | 24.63872 | 0.381470035 | 0.725584021  | 4.44E-16 | 6.0942838 | 5.5E-46 | 2.7  | 1.0E+00  |
| 3141857 | TPD52     | NM_001025253 | 18.15661 | 0.380114132 | 0.837249941  | 0        | 6.4104289 | 3.3E-22 | 3.5  | 1.2E-36  |
| 3678000 | TFAP4     | NM_003223    | 31.23271 | 0.378399292 | -0.800123117 | 3.09E-21 | 7.0741353 | 6.2E-11 | 1.4  | 2.7E-12  |
| 3784208 | DTNA      | NM_032979    | 35.25791 | 0.37823119  | 0.780041694  | 0        | 7.2985892 | 1.4E-14 | 2.3  | 2.2E-115 |
| 2442008 | RXRG      | NM_006917    | 17.25476 | 0.378156153 | 0.448350254  | 9.35E-06 | 6.2153012 | 4.2E-38 | 36.4 | 7.6E-145 |
| 2324416 | ALPL      | NM_000478    | 21.50159 | 0.378150989 | 0.516848323  | 1.84E-07 | 6.1840212 | 1.5E-40 | 3.6  | 4.3E-36  |
| 4004819 | TCTE1L    | NM_006520    | 27.23673 | 0.377167757 | 0.754195885  | 0        | 7.687749  | 1.0E-12 | 2.7  | 4.3E-12  |
| 3758692 | MPP2      | NM_005374    | 17.8781  | 0.375830859 | 0.749575438  | 0        | 7.0944501 | 3.4E-20 | 2.1  | 2.5E-05  |
| 2808931 | ISL1      | NM_002202    | 16.14403 | 0.373945959 | 0.486620927  | 1.16E-06 | 4.8002867 | 3.5E-41 | 6.7  | 3.9E-65  |
| 2356115 | TXNIP     | NM_006472    | 18.6895  | 0.371764529 | -0.82343303  | 2.26E-23 | 10.086421 | 1.3E-16 | 2.8  | 5.3E-04  |
| 3464747 | KITLG     | NM_003994    | 22.5879  | 0.371653462 | 0.794385799  | 0        | 8.8649621 | 7.4E-30 | 7.6  | 1.4E-10  |
| 2681044 | FAM19A4   | NM_001005527 | 20.35683 | 0.369552764 | 0.830299419  | 0        | 4.6872713 | 7.3E-25 | 2.2  | 1.0E+00  |
| 2704733 | ARPM1     | NM_032487    | 19.80963 | 0.368275182 | 0.84465816   | 0        | 5.9948799 | 1.2E-18 | 2.0  | 1.5E-01  |
| 3136229 | RDHE2     | NM_138969    | 26.87874 | 0.365011845 | 0.747324427  | 0        | 4.2372108 | 1.0E-38 | 1.8  | 3.1E-25  |
| 3510858 | FOXO1A    | NM_002015    | 20.48042 | 0.362614153 | 0.566301492  | 5.98E-09 | 7.9110364 | --      | --   | --       |
| 3665603 | CTCF      | NM_006565    | 16.78136 | 0.361781389 | -0.794830462 | 8.62E-21 | 8.6063431 | 4.8E-10 | 1.5  | 1.3E-06  |
| 2696040 | RAB6B     | NM_016577    | 19.95432 | 0.356168211 | 0.765213371  | 0        | 9.3079665 | 2.4E-10 | 2.1  | 2.5E-01  |
| 3744217 | VAMP2     | NM_014232    | 21.87491 | 0.354578609 | 0.767037735  | 0        | 9.8443746 | 4.4E-09 | 2.0  | 1.5E-02  |
| 3960930 | CBX6      | NM_014292    | 21.73322 | 0.352449462 | 0.798406614  | 0        | 8.3627624 | 2.8E-11 | 2.1  | 6.5E-11  |
| 3845944 | GN7       | NM_052847    | 25.83204 | 0.350308946 | 0.587212833  | 1.18E-09 | 7.7486619 | 8.9E-33 | 6.0  | 1.6E-51  |
| 2915571 | C6orf117  | NM_138409    | 21.55303 | 0.349389879 | 0.798215879  | 0        | 6.691891  | 1.2E-27 | 3.4  | 3.5E-20  |
| 3876084 | C20orf103 | NM_012261    | 36.67256 | 0.347832225 | 0.546793177  | 2.47E-08 | 5.491761  | 1.7E-39 | 4.2  | 1.3E-63  |
| 3313690 | TCERG1L   | NM_174937    | 26.32131 | 0.345631943 | 0.789394142  | 0        | 6.9041583 | 6.0E-27 | 3.7  | 1.0E-22  |
| 3329983 | PTPRJ     | NM_002843    | 33.06624 | 0.343499197 | 0.802051715  | 0        | 7.6279779 | 9.6E-16 | 1.6  | 2.4E-10  |
| 3473586 | KSR2      | NM_173598    | 36.85921 | 0.342634492 | 0.826777882  | 0        | 6.2548896 | 1.4E-25 | 1.7  | 3.7E-36  |
| 3956226 | MN1       | NM_002430    | 35.79828 | 0.341566218 | -0.765750815 | 1.49E-18 | 8.8435442 | 1.7E-38 | 5.7  | 7.9E-88  |
| 3391653 | DRD2      | NM_016574    | 22.08399 | 0.340987785 | 0.587823565  | 1.12E-09 | 6.7637557 | 2.6E-38 | 6.1  | 1.2E-60  |
| 2815043 | TNPO1     | NM_002270    | 54.27955 | 0.340539881 | -0.800607716 | 2.81E-21 | 9.9760876 | 1.8E-10 | 1.7  | 8.8E-03  |
| 3587226 | CHRNA7    | NM_000746    | 18.73589 | 0.338634777 | 0.799092052  | 0        | 6.6336025 | 2.9E-24 | 2.8  | 2.9E-09  |
| 2610544 | SLC6A11   | NM_014229    | 29.40273 | 0.338115835 | 0.825602694  | 0        | 8.3492179 | 3.3E-17 | 2.4  | 2.3E-14  |
| 2926969 | PDE7B     | NM_018945    | 16.0682  | 0.336739245 | 0.497242797  | 6.18E-07 | 5.1813012 | 4.7E-32 | 5.9  | 2.0E-78  |
| 3415744 | IGFBP6    | NM_002178    | 16.4442  | 0.336444001 | 0.782678714  | 0        | 7.0774473 | 2.4E-18 | 1.6  | 6.7E-19  |
| 2663244 | RAF1      | NM_002880    | 30.53818 | 0.335139384 | -0.823870319 | 2.05E-23 | 9.4871281 | 3.3E-07 | 1.4  | 7.3E-06  |
| 2641901 | TRH       | NM_007117    | 27.20198 | 0.334588866 | 0.795579898  | 0        | 7.2406132 | 2.6E-28 | 4.2  | 6.6E-14  |
| 2913123 | RIMS1     | NM_014989    | 17.43501 | 0.333277002 | 0.731017651  | 4.44E-16 | 7.9931162 | 4.4E-12 | 1.4  | 3.6E-86  |
| 2648305 | P2RY1     | NM_002563    | 32.75168 | 0.332346308 | 0.470653543  | 2.85E-06 | 6.457257  | 3.9E-41 | 10.9 | 3.0E-27  |
| 2479943 | LOC440860 | XM_498899    | 12.83564 | 0.331611928 | 0.432462093  | 2.07E-05 | 6.1443917 | --      | --   | --       |
| 3549517 | OTUB2     | NM_023112    | 18.18311 | 0.329448917 | 0.802520468  | 0        | 6.7768728 | 2.6E-18 | 1.8  | 4.6E-04  |
| 2708922 | IMP-2     | NM_006548    | 23.83285 | 0.326949021 | -0.846861473 | 7.34E-26 | 7.2444693 | 3.1E-13 | 2.1  | 1.4E-29  |
| 3868828 | KLK10     | NM_002776    | 19.06777 | 0.322487387 | 0.719472336  | 1.33E-15 | 6.3906294 | 8.7E-29 | 2.4  | 2.4E-07  |
| 3833443 | PLD3      | NM_012268    | 23.18493 | 0.322304614 | 0.762793744  | 0        | 9.5193148 | 4.4E-13 | 1.9  | 3.3E-10  |
| 2793401 | MFAP3L    | NM_001009554 | 17.3055  | 0.321877478 | 0.768599313  | 0        | 5.781996  | 4.3E-13 | 1.6  | 1.2E-20  |
| 2969467 | LOC442243 | XM_498127    | 32.46097 | 0.320902255 | -0.754622991 | 8.79E-18 | 9.0631236 | 5.1E-14 | 2.0  | 3.5E-41  |
| 3792273 | CDH7      | NM_004361    | 24.03342 | 0.318994448 | 0.775550724  | 0        | 4.9227658 | 1.4E-34 | 5.8  | 2.3E-64  |
| 2686602 | IMP2      | NM_016247    | 12.00821 | 0.317498888 | 0.781611376  | 0        | 5.6618112 | 1.8E-30 | 2.2  | 1.8E-18  |
| 3743763 | ZBTB4     | NM_020899    | 18.62495 | 0.315485669 | 0.770563701  | 0        | 7.3596292 | 3.3E-09 | 1.5  | 1.8E-03  |
| 2997907 | EPDR1     | NM_017549    | 23.23323 | 0.313777174 | 0.831065632  | 0        | 6.6323332 | 1.2E-14 | 1.8  | 1.0E+00  |
| 3967689 | STS       | NM_000351    | 16.86275 | 0.311923626 | 0.744358309  | 0        | 7.0711274 | 4.0E-10 | 2.3  | 3.8E-14  |
| 3205659 | SHB       | NM_003028    | 17.12051 | 0.308949035 | -0.708386374 | 5.74E-15 | 7.9272085 | 1.1E-13 | 2.2  | 2.0E-24  |
| 2827772 | ADAMTS19  | NM_133638    | 12.0117  | 0.307106096 | 0.750479262  | 0        | 5.0400045 | 3.4E-35 | 1.8  | 4.7E-87  |
| 2702610 | SHOX2     | NM_003030    | 13.8533  | 0.30605007  | 0.690088099  | 5.33E-14 | 5.7269416 | 1.4E-52 | 2.6  | 3.5E-44  |
| 3446137 | LMO3      | NM_018640    | 22.11238 | 0.304735834 | -0.719062124 | 1.44E-15 | 10.987203 | 1.6E-28 | 6.0  | 3.2E-56  |
| 3361672 | LMO1      | NM_002315    | 28.13504 | 0.304206108 | 0.824876727  | 0        | 6.1763022 | 4.2E-30 | 5.0  | 1.7E-39  |
| 3627422 | RORA      | NM_134260    | 28.83605 | 0.303390959 | 0.7988503    | 0        | 6.2584933 | 4.8E-34 | 9.4  | 2.5E-233 |
| 3334325 | VEGFB     | NM_003377    | 20.58038 | 0.303165945 | 0.809645964  | 0        | 8.5274453 | 1.2E-17 | 1.8  | 4.5E-06  |
| 3393652 | SCN2B     | NM_004588    | 16.5617  | 0.302160146 | 0.823921244  | 0        | 7.0313755 | 3.6E-18 | 2.1  | 3.9E-08  |

|         |                  |              |          |             |                     |           |           |         |      |          |
|---------|------------------|--------------|----------|-------------|---------------------|-----------|-----------|---------|------|----------|
| 3894906 | PDYN             | NM_024411    | 12.88596 | 0.301974314 | 0.42922305          | 2.43E-05  | 5.7292081 | 5.3E-39 | 11.3 | 5.1E-90  |
| 3528944 | FLJ38964         | NM_173527    | 41.89629 | 0.300586635 | 0.69822105          | 2.02E-14  | 5.9493356 | 1.1E-31 | 1.8  | 1.8E-21  |
| 3218113 | C9orf125         | NM_032342    | 17.26982 | 0.300239262 | 0.773146159         | 0         | 8.4200869 | --      | --   | --       |
| 2827645 | SLC27A6          | NM_001017372 | 11.98623 | 0.298890162 | 0.783338569         | 0         | 4.3177735 | --      | --   | --       |
| 3414390 | <b>SMARCD1</b>   | NM_139071    | 16.73071 | 0.298871932 | <b>-0.680035917</b> | 1.69E-13  | 8.5834887 | 1.6E-07 | 1.5  | 2.7E-09  |
| 3523318 | VGCNL1           | NM_052867    | 17.0638  | 0.29602488  | 0.746599928         | 0         | 7.0677858 | 1.3E-09 | 2.3  | 7.8E-41  |
| 4007550 | PCSK1N           | NM_013271    | 22.4505  | 0.294862053 | 0.791545911         | 0         | 9.3176793 | --      | --   | --       |
| 3219885 | PTPN3            | NM_002829    | 10.72717 | 0.293453485 | 0.703286855         | 1.09E-14  | 5.6969112 | 1.4E-35 | 9.3  | 0.0E+00  |
| 2827388 | <b>LOC133619</b> | NM_130809    | 52.54351 | 0.293030385 | <b>-0.757932577</b> | 5.23E-18  | 8.8477846 | 2.6E-07 | 1.5  | 2.7E-03  |
| 2689378 | DRD3             | NM_033663    | 9.04609  | 0.292050912 | 0.207149288         | 0.0501098 | 4.7193888 | --      | --   | --       |
| 4007765 | PRAF2            | NM_007213    | 19.22687 | 0.291569346 | 0.763291656         | 0         | 8.1271014 | --      | --   | --       |
| 3129026 | CHRNA2           | NM_000742    | 9.953557 | 0.288949738 | 0.713437736         | 3.11E-15  | 6.2154265 | 3.0E-22 | 7.6  | 7.5E-66  |
| 3159061 | <b>ZNF250</b>    | NM_021061    | 24.52449 | 0.288686341 | <b>-0.800322064</b> | 2.97E-21  | 8.3479041 | 1.0E-12 | 1.5  | 7.5E-08  |
| 3874900 | CDS2             | NM_003818    | 17.00259 | 0.288408653 | 0.770994929         | 0         | 9.3464866 | 3.6E-07 | 1.5  | 3.4E-03  |
| 3252690 | C10orf11         | NM_032024    | 9.322616 | 0.287927372 | 0.245682818         | 0.0195922 | 4.7340142 | 1.0E-40 | 2.5  | 4.5E-13  |
| 3985866 | CXorf39          | NM_207318    | 15.70337 | 0.285424126 | 0.776972863         | 0         | 8.5608643 | 9.8E-05 | 1.6  | 1.3E-01  |
| 3686278 | MGC18079         | NM_144675    | 14.40264 | 0.284318896 | 0.743684715         | 0         | 7.1509773 | 7.7E-22 | 2.9  | 7.3E-56  |
| 3307851 | KIAA1914         | NM_001001936 | 17.54412 | 0.284202493 | 0.764002214         | 0         | 5.961755  | 1.1E-15 | 1.7  | 2.4E-12  |
| 2643901 | <b>PPP2R3A</b>   | NM_181897    | 31.22257 | 0.283917403 | <b>-0.770530779</b> | 6.71E-19  | 7.3816327 | 6.1E-05 | 1.5  | 3.1E-05  |
| 3557017 | <b>C14orf93</b>  | NM_021944    | 15.60513 | 0.281378542 | <b>-0.765863024</b> | 1.46E-18  | 6.1378713 | 3.4E-08 | 1.5  | 4.8E-05  |
| 3987029 | RP13-360B22.2    | NM_032227    | 14.61041 | 0.278981291 | 0.786425351         | 0         | 6.9807347 | 9.4E-19 | 1.9  | 2.1E-08  |
| 3496366 | <b>C13orf25</b>  | NM_213724    | 39.20566 | 0.278859316 | <b>-0.798105705</b> | 4.58E-21  | 5.3781759 | 2.2E-11 | 1.7  | 5.7E-05  |
| 3743852 | <b>FXR2</b>      | NM_004860    | 12.74068 | 0.2787078   | <b>-0.755896812</b> | 7.21E-18  | 8.6122044 | 1.0E-05 | 1.4  | 2.2E-03  |
| 2915828 | NT5E             | NM_002526    | 26.89036 | 0.278388223 | 0.786085794         | 0         | 4.7995285 | 2.9E-22 | 2.0  | 4.3E-27  |
| 3874751 | PRNP             | NM_183079    | 23.95187 | 0.277803926 | 0.748203624         | 0         | 10.424083 | 7.1E-10 | 1.6  | 1.5E-03  |
| 2434139 | SV2A             | NM_014849    | 19.69613 | 0.27733312  | 0.764306135         | 0         | 9.0273275 | 4.7E-10 | 2.1  | 2.0E-15  |
| 3644340 | SLC9A3R2         | ---          | 16.20806 | 0.276933629 | 0.735789029         | 0         | 7.8655087 | 1.5E-12 | 1.8  | 1.6E-05  |
| 3747199 | <b>PRR6</b>      | NM_181716    | 14.02168 | 0.276913502 | <b>-0.718875054</b> | 1.48E-15  | 8.6063323 | 7.3E-09 | 2.2  | 1.2E-05  |
| 3184408 | PALM2-AKAP2      | NM_147150    | 16.73624 | 0.276752858 | 0.710262137         | 4.44E-15  | 7.8333637 | 1.5E-14 | 2.4  | 3.5E-43  |
| 2442698 | CREG1            | NM_003851    | 21.21387 | 0.275615671 | 0.790878185         | 0         | 8.0048917 | 7.0E-14 | 2.2  | 5.3E-01  |
| 2921022 | GPR6             | NM_005284    | 9.469844 | 0.275425928 | 0.327687632         | 0.0016171 | 7.1816546 | 4.9E-24 | 3.8  | 2.6E-03  |
| 2924330 | TPD52L1          | NM_001003397 | 21.94511 | 0.274411735 | 0.555231989         | 1.35E-08  | 5.8506086 | 2.0E-32 | 11.5 | 2.9E-113 |
| 3644887 | ATP6VOC          | NM_001694    | 26.83215 | 0.274387326 | 0.741978719         | 0         | 9.011464  | 3.0E-12 | 2.2  | 1.2E-17  |
| 2912980 | OGFRL1           | NM_024576    | 34.48803 | 0.271985803 | 0.698180878         | 2.04E-14  | 7.1720303 | 1.9E-18 | 2.3  | 2.0E-21  |
| 2644333 | SOX14            | NM_004189    | 10.86608 | 0.27161184  | 0.720077212         | 1.33E-15  | 5.9320727 | --      | --   | --       |
| 2842707 | TSPAN17          | NM_001006616 | 10.59655 | 0.271221507 | 0.706103483         | 7.55E-15  | 8.1427574 | 3.1E-23 | 2.0  | 2.0E-03  |
| 2781387 | AGXT2L1          | NM_031279    | 17.32518 | 0.270991388 | 0.831528734         | 0         | 3.8214533 | 8.9E-24 | 2.1  | 5.5E-09  |
| 3921068 | ETS2             | NM_005239    | 15.44115 | 0.268639532 | 0.80228587          | 0         | 6.8341479 | 3.5E-13 | 1.9  | 6.0E-11  |
| 3179975 | <b>PHF2</b>      | NM_005392    | 24.60548 | 0.266382576 | <b>-0.705663049</b> | 8.19E-15  | 7.9392123 | 3.6E-09 | 1.4  | 7.3E-06  |
| 2378325 | SERTAD4          | NM_019605    | 12.47975 | 0.264424307 | 0.375825515         | 0.0002619 | 5.2349675 | 4.4E-38 | 10.9 | 1.4E-52  |
| 2376849 | RASSF5           | NM_031437    | 15.77213 | 0.263505591 | 0.777028625         | 0         | 5.6298989 | 5.2E-25 | 1.8  | 1.6E-13  |
| 3129465 | <b>RC74</b>      | NM_018250    | 11.07318 | 0.262981943 | <b>-0.767598218</b> | 1.10E-18  | 7.6887517 | 1.2E-04 | 1.4  | 1.4E-02  |
| 3451814 | <b>NELL2</b>     | NM_006159    | 54.42036 | 0.262655794 | <b>-0.648210967</b> | 4.96E-12  | 11.312332 | 3.4E-26 | 2.9  | 6.0E-25  |
| 2609870 | <b>BRPF1</b>     | NM_001003694 | 17.94652 | 0.262020714 | <b>-0.778938353</b> | 1.58E-19  | 7.0516238 | 8.8E-05 | 1.2  | 5.9E-03  |
| 3401381 | TSPAN9           | NM_006675    | 23.28119 | 0.261338382 | 0.476629146         | 2.05E-06  | 6.4686753 | 4.4E-37 | 2.6  | 8.3E-33  |
| 2947889 | GABBR1           | NM_021905    | 17.73906 | 0.260957977 | 0.749868384         | 0         | 9.4140607 | 1.8E-08 | 1.5  | 4.0E-10  |
| 3899954 | <b>CRNKL1</b>    | NM_016652    | 19.56936 | 0.260938676 | <b>-0.776392264</b> | 2.47E-19  | 7.50926   | 3.4E-06 | 1.5  | 5.6E-10  |
| 2935311 | PACRG            | NM_152410    | 47.64503 | 0.260393062 | 0.782217674         | 0         | 6.1680471 | 2.6E-36 | 2.5  | 1.9E-101 |
| 2984275 | PDE10A           | NM_006661    | 8.537364 | 0.259703866 | 0.29925917          | 0.004166  | 7.8394287 | 2.9E-39 | 7.5  | 1.1E-105 |
| 2845973 | FLJ12443         | NM_024830    | 21.75033 | 0.257338874 | 0.762097694         | 0         | 8.1326542 | 5.4E-16 | 2.0  | 2.5E-02  |
| 3340913 | <b>C11orf30</b>  | NM_020193    | 15.07718 | 0.255513255 | <b>-0.748773998</b> | 2.16E-17  | 8.4014969 | 6.3E-10 | 1.6  | 5.4E-09  |
| 3553017 | <b>WDR20</b>     | NM_181302    | 19.9266  | 0.255043221 | <b>-0.801383909</b> | 2.41E-21  | 7.121215  | 1.7E-07 | 1.5  | 3.9E-04  |
| 2881300 | CAMK2A           | NM_015981    | 18.37173 | 0.254415481 | 0.738756145         | 0         | 7.2482756 | 2.5E-24 | 4.3  | 5.8E-27  |
| 2371139 | LAMC2            | NM_005562    | 17.78766 | 0.253781724 | 0.516803458         | 1.84E-07  | 4.9359051 | 2.3E-34 | 2.1  | 3.7E-66  |
| 2932219 | OPRM1            | NM_001008504 | 13.36844 | 0.253679843 | 0.773329092         | 0         | 5.0599727 | 1.3E-36 | 2.1  | 5.1E-96  |
| 3996381 | ATP6AP1          | NM_001183    | 21.05957 | 0.251260797 | 0.708766752         | 5.33E-15  | 9.586064  | 4.1E-10 | 1.7  | 1.3E-12  |
| 3992512 | BR53             | NM_001727    | 8.069886 | 0.250441065 | 0.210148095         | 0.0468082 | 3.9646508 | 1.9E-35 | 4.1  | 1.4E-14  |
| 3762753 | CA10             | NM_020178    | 13.86303 | 0.249893589 | 0.778306144         | 0         | 6.8602369 | 8.1E-13 | 4.3  | 5.0E-57  |
| 2922972 | DCBLD1           | NM_173674    | 11.00052 | 0.249474079 | 0.770455184         | 0         | 6.1605191 | 2.6E-21 | 5.2  | 2.2E-20  |
| 3355860 | KCNJ5            | NM_000890    | 9.939386 | 0.249467309 | 0.744267191         | 0         | 5.4135198 | 4.2E-26 | 2.3  | 2.2E-37  |
| 3376235 | <b>WDR74</b>     | NM_018093    | 13.09849 | 0.249212752 | <b>-0.727676732</b> | 4.51E-16  | 8.126677  | 4.5E-07 | 1.5  | 9.3E-02  |
| 2435044 | <b>POGZ</b>      | NM_015100    | 17.47291 | 0.248832352 | <b>-0.751733447</b> | 1.37E-17  | 9.1866431 | 2.4E-08 | 1.3  | 1.4E-04  |
| 3623655 | HDC              | NM_002112    | 10.88807 | 0.247622392 | 0.708955203         | 5.33E-15  | 4.8438384 | 6.2E-20 | 2.1  | 1.0E-36  |
| 3876990 | SPTLC2L          | AK075271     | 15.96029 | 0.24715906  | 0.772009159         | 0         | 3.9984508 | --      | --   | --       |
| 4001556 | <b>PHKA2</b>     | NM_000292    | 16.61346 | 0.24673362  | <b>-0.763808511</b> | 2.04E-18  | 7.5700456 | 3.1E-09 | 1.4  | 5.0E-08  |
| 3662696 | CX3CL1           | NM_002996    | 21.10429 | 0.246377281 | 0.699507529         | 1.73E-14  | 6.9100086 | 2.6E-21 | 2.5  | 7.0E-18  |
| 2342475 | LHX8             | NM_001001933 | 7.758861 | 0.243486557 | 0.270110822         | 0.010032  | 4.4644475 | 1.8E-31 | 4.6  | 7.9E-17  |
| 3442176 | <b>ING4</b>      | NM_016162    | 14.15107 | 0.243307804 | <b>-0.777562821</b> | 2.01E-19  | 8.512162  | 4.5E-11 | 1.4  | 9.6E-04  |
| 2586038 | LRP2             | NM_004525    | 29.09823 | 0.242336707 | 0.716388328         | 2.00E-15  | 4.7901266 | 2.3E-39 | 3.7  | 0.0E+00  |
| 3975987 | <b>RBM10</b>     | NM_152856    | 16.50721 | 0.240565804 | <b>-0.604898079</b> | 2.71E-10  | 8.0223118 | 1.1E-04 | 1.3  | 1.5E-05  |
| 3820663 | <b>ILF3</b>      | NM_012218    | 17.03706 | 0.240276736 | <b>-0.759924529</b> | 3.81E-18  | 9.5494631 | 1.1E-11 | 1.5  | 3.0E-02  |
| 3701297 | CDYL2            | NM_152342    | 15.95518 | 0.239908172 | 0.775553285         | 0         | 6.916154  | 2.1E-12 | 1.3  | 7.9E-07  |
| 2351294 | KCNC4            | NM_153763    | 14.63498 | 0.237678612 | 0.755721717         | 0         | 7.4911489 | 9.1E-19 | 1.7  | 3.2E-11  |
| 2951221 | C6orf106         | NM_024294    | 10.99385 | 0.235954324 | 0.746480839         | 0         | 7.4730819 | 1.8E-15 | 2.0  | 6.5E-07  |
| 3843463 | <b>ZNF551</b>    | NM_138347    | 34.50996 | 0.234509978 | <b>-0.778577816</b> | 1.69E-19  | 7.3494885 | 7.7E-03 | 1.2  | 5.4E-16  |
| 3394412 | THY1             | NM_006288    | 14.96433 | 0.234378129 | 0.763254349         | 0         | 9.3071326 | 1.9E-12 | 2.1  | 1.5E-02  |
| 3643752 | BAIAP3           | NM_003933    | 32.71961 | 0.233755424 | 0.784319165         | 0         | 7.0299784 | 1.1E-25 | 2.8  | 4.3E-167 |
| 3799461 | <b>SPIRE1</b>    | NM_020148    | 38.17316 | 0.233602822 | <b>-0.656810427</b> | 2.07E-12  | 9.8379737 | 1.8E-28 | 3.1  | 1.9E-03  |
| 2428405 | PPM1J            | NM_005167    | 20.62625 | 0.23245328  | 0.77260048          | 0         | 7.9363208 | 4.0E-20 | 2.2  | 5.1E-15  |
| 3001479 | ZNFN1A1          | NM_006060    | 10.08592 | 0.230689903 | 0.345792108         | 0.0008432 | 5.331753  | 3.3E-22 | 2.2  | 2.0E-17  |
| 3715512 | TNFAIP1          | NM_021137    | 25.96881 | 0.228664382 | 0.75212821          | 0         | 8.43806   | 1.5E-11 | 1.4  | 4.0E-01  |
| 3894047 | <b>LOC441123</b> | XM_496791    | 12.37941 | 0.227904624 | <b>-0.749168011</b> | 2.03E-17  | 8.7822265 | 6.5E-07 | 1.7  | 2.9E-24  |
| 3401325 | TSPAN9           | NM_006675    | 23.47127 | 0.226751197 | 0.496659995         | 6.40E-07  | 6.7638996 | 1.7E-34 | 4.7  | 3.0E-95  |
| 2836856 | <b>CNOT8</b>     | NM_004779    | 28.36696 | 0.226529238 | <b>-0.749498061</b> | 1.93E-17  | 8.9974841 | 5.0E-05 | 1.3  | 2.0E-02  |
| 3980758 | <b>MED12</b>     | NM_005120    | 15.22968 | 0.225183259 | <b>-0.656221318</b> | 2.20E-12  | 7.7316355 | 1.7E-05 | 1.5  | 2.4E-15  |

Y (KEGG)

|         |            |              |          |             |              |           |           |         |     |          |
|---------|------------|--------------|----------|-------------|--------------|-----------|-----------|---------|-----|----------|
| 2771342 | EPHA5      | NM_004439    | 14.99365 | 0.224025248 | -0.721203695 | 1.08E-15  | 9.674527  | 1.0E-15 | 6.4 | 4.4E-09  |
| 3361072 | DCHS1      | NM_003737    | 22.40047 | 0.224012775 | -0.699184077 | 1.80E-14  | 8.406361  | 3.0E-10 | 1.6 | 3.5E-05  |
| 3066436 | FLJ20485   | NM_019042    | 39.5508  | 0.223942102 | -0.712719453 | 3.30E-15  | 6.415078  | 4.7E-08 | 1.5 | 3.6E-09  |
| 2377229 | LOC388297  | XM_370991    | 20.3563  | 0.220648921 | 0.765160489  | 0         | 5.6606362 | 1.2E-22 | 3.2 | 1.3E-41  |
| 2620114 | ZNF167     | NM_025169    | 22.27013 | 0.217795556 | -0.755432178 | 7.75E-18  | 6.4449773 | 1.7E-03 | 1.2 | 2.0E-01  |
| 3829687 | GPI        | NM_000175    | 13.2133  | 0.216849185 | 0.683300687  | 1.17E-13  | 9.9227968 | 5.0E-06 | 1.5 | 2.2E-06  |
| 2348569 | PALMD      | NM_017734    | 15.79446 | 0.216520054 | -0.724243988 | 7.21E-16  | 6.9616148 | 5.7E-15 | 3.2 | 2.6E-52  |
| 3358393 | BM88       | NM_016564    | 27.38937 | 0.214599651 | 0.716363843  | 2.22E-15  | 7.7031793 | 8.5E-13 | 1.6 | 6.4E-03  |
| 3848437 | XAB2       | NM_020196    | 21.75402 | 0.214488495 | -0.5936914   | 6.95E-10  | 7.9932567 | 4.5E-06 | 1.5 | 3.3E-07  |
| 3334847 | C11orf2    | NM_013265    | 18.62704 | 0.21368593  | -0.795043537 | 8.27E-21  | 9.4786816 | 2.8E-15 | 1.8 | 4.7E-08  |
| 4015763 | GLA        | NM_000169    | 10.26727 | 0.213620493 | -0.781951161 | 9.29E-20  | 6.6325598 | 1.7E-11 | 1.7 | 5.6E-01  |
| 3013894 | DLX6       | XM_379892    | 6.498663 | 0.213220867 | 0.184656521  | 0.0814498 | 6.84544   | --      | --  | --       |
| 2655168 | YEATS2     | NM_018023    | 35.73366 | 0.213094233 | -0.705892079 | 7.86E-15  | 8.5659374 | 3.5E-06 | 1.3 | 6.0E-03  |
| 2916825 | ANKRD6     | NM_014942    | 12.68156 | 0.212866091 | 0.699758684  | 1.69E-14  | 7.0773445 | 2.1E-12 | 1.9 | 1.1E-06  |
| 3830189 | FXD1       | NM_005031    | 23.37609 | 0.212418881 | 0.795338836  | 0         | 6.4920403 | 6.1E-21 | 2.1 | 6.2E-04  |
| 2614369 | RARB       | NM_000965    | 10.96286 | 0.211770271 | 0.537533214  | 4.69E-08  | 5.9673652 | 4.2E-30 | 8.6 | 2.4E-154 |
| 2523354 | ALS2CR13   | NM_173511    | 23.87525 | 0.211643716 | -0.739864211 | 8.07E-17  | 9.0188732 | 6.0E-10 | 1.6 | 3.5E-02  |
| 3985260 | GPRASP1    | NM_014710    | 12.81086 | 0.210382893 | 0.771223136  | 0         | 8.1146153 | 4.2E-10 | 1.9 | 1.0E-04  |
| 3695699 | ATP6V0D1   | NM_004691    | 22.10095 | 0.210209181 | 0.738833071  | 0         | 9.1215439 | 5.8E-14 | 1.5 | 4.6E-08  |
| 3768791 | ABCA6      | NM_172346    | 10.33841 | 0.209767077 | 0.759768191  | 0         | 3.9015797 | 5.1E-12 | 1.4 | 8.8E-35  |
| 2465551 | ZNF124     | NM_003431    | 22.93138 | 0.209487693 | -0.777084135 | 2.19E-19  | 7.5513061 | 3.2E-06 | 1.8 | 5.6E-03  |
| 2316746 | LOC440555  | XM_498732    | 16.57956 | 0.209398054 | 0.758793913  | 0         | 8.2914052 | 4.6E-13 | 1.5 | 6.5E-09  |
| 3924254 | LOC441968  | XM_497787    | 19.67741 | 0.208602211 | 0.702530163  | 1.20E-14  | 6.0826854 | 4.2E-38 | 3.0 | 4.3E-57  |
| 3088983 | XPO7       | NM_015024    | 33.23521 | 0.208518809 | -0.70575041  | 8.00E-15  | 8.7137436 | 6.4E-05 | 3.3 | 4.9E-03  |
| 3576441 | KIAA1509   | NM_029353    | 12.9185  | 0.207809033 | 0.298262348  | 0.0042995 | 7.4109271 | 8.0E-27 | 4.7 | 6.4E-23  |
| 3878619 | SLC24A3    | NM_020689    | 12.06566 | 0.207316268 | 0.709264769  | 5.11E-15  | 7.9027763 | 1.6E-11 | 2.3 | 2.8E-09  |
| 3479015 | GALNT9     | NM_021808    | 13.81053 | 0.207175787 | 0.706838152  | 7.11E-15  | 6.4215086 | 1.6E-22 | 3.1 | 2.5E-28  |
| 2759654 | ABLIM2     | NM_032432    | 16.90166 | 0.20697063  | 0.760437674  | 0         | 7.5893925 | 2.8E-18 | 2.0 | 3.2E-08  |
| 3358262 | DEAF1      | NM_021008    | 15.76934 | 0.206474741 | 0.711617682  | 3.77E-15  | 8.6898539 | 4.3E-13 | 1.8 | 8.1E-02  |
| 4022183 | HS6ST2     | NM_147174    | 40.47945 | 0.204712835 | 0.685700257  | 8.88E-14  | 5.8643302 | 1.2E-27 | 4.1 | 1.1E-23  |
| 2892277 | NQO2       | NM_000904    | 13.02127 | 0.203701057 | 0.770506276  | 0         | 6.7418501 | 1.4E-17 | 1.7 | 4.8E-02  |
| 3262165 | TAF5       | NM_006951    | 23.2654  | 0.201533423 | -0.767735491 | 1.07E-18  | 6.7732428 | 1.1E-05 | 1.3 | 1.0E-02  |
| 3709838 | NTN1       | NM_004822    | 9.723699 | 0.199998669 | 0.305431844  | 0.0034184 | 6.9694429 | --      | --  | --       |
| 2882253 | GLRA1      | NM_000171    | 8.495088 | 0.199698063 | 0.689595714  | 5.64E-14  | 4.1142903 | --      | --  | --       |
| 2673902 | FLJ20259   | NM_198880    | 12.23203 | 0.199646737 | -0.705752717 | 7.99E-15  | 8.3857047 | 9.1E-05 | 1.2 | 2.6E-01  |
| 3729172 | CLTC       | NM_004859    | 15.56712 | 0.199122505 | 0.68604761   | 8.53E-14  | 9.8306955 | 3.5E-06 | 1.5 | 9.4E-12  |
| 2394588 | ICMT       | NM_012405    | 15.38062 | 0.199004279 | 0.765533653  | 0         | 6.9033014 | 5.7E-14 | 1.6 | 7.1E-04  |
| 2890413 | RNF130     | NM_018434    | 17.64797 | 0.19762039  | -0.766833823 | 1.24E-18  | 8.8767561 | 3.1E-06 | 1.5 | 7.6E-03  |
| 2668351 | UBP1       | NM_014517    | 33.51047 | 0.197336181 | -0.711072886 | 4.08E-15  | 8.3138451 | --      | --  | --       |
| 2520429 | MYO1B      | NM_012223    | 25.04444 | 0.19445856  | 0.740389882  | 0         | 7.4948999 | 1.3E-17 | 3.2 | 1.4E-16  |
| 3670725 | GAN        | NM_022041    | 11.73834 | 0.193929187 | 0.669149276  | 5.63E-13  | 8.1805005 | 2.2E-06 | 1.6 | 1.9E-01  |
| 2439554 | AIM2       | NM_004833    | 16.47991 | 0.191454407 | -0.636715382 | 1.53E-11  | 5.3703481 | 1.4E-10 | 1.9 | 2.5E-01  |
| 2372858 | RGS2       | NM_002923    | 7.097202 | 0.191003818 | 0.376550525  | 0.0002542 | 7.7026577 | 2.8E-32 | 5.9 | 1.4E-04  |
| 3579546 | WARS       | NM_004184    | 11.89886 | 0.189341732 | 0.746721857  | 0         | 7.3007465 | 3.7E-09 | 1.6 | 5.5E-06  |
| 3984702 | DRP2       | NM_001939    | 13.41941 | 0.189097615 | 0.598810883  | 4.54E-10  | 6.7595705 | 4.4E-22 | 1.9 | 1.7E-19  |
| 3599495 | CORO2B     | NM_006091    | 7.924932 | 0.188848927 | -0.662315405 | 1.17E-12  | 8.8484658 | 1.5E-12 | 2.5 | 1.6E-01  |
| 2770427 | C4orf14    | NM_032313    | 21.48981 | 0.188282651 | -0.720240566 | 1.23E-15  | 7.6994956 | 6.8E-04 | 1.5 | 6.0E-06  |
| 2949524 | EHMT2      | NM_006709    | 11.80751 | 0.185952137 | -0.681629007 | 1.41E-13  | 8.2861723 | 2.0E-05 | 1.3 | 2.7E-15  |
| 3210616 | C9orf65    | NM_138818    | 6.638355 | 0.18381212  | 0.681045151  | 1.51E-13  | 3.8156478 | 3.3E-26 | 2.5 | 1.0E+00  |
| 3190939 | PPP2R4     | NM_178000    | 16.54765 | 0.18340934  | 0.71749087   | 1.78E-15  | 8.8882495 | 6.7E-10 | 1.4 | 1.0E-09  |
| 3288337 | ARHGAP22   | NM_021226    | 14.8211  | 0.182656366 | 0.753965774  | 0         | 5.5362002 | --      | --  | --       |
| 3289948 | PCDH15     | NM_033056    | 30.3582  | 0.182341225 | 0.712550856  | 3.33E-15  | 5.0729273 | 7.6E-17 | 2.4 | 6.1E-78  |
| 3808745 | SE57-1     | NM_025214    | 7.233417 | 0.180982257 | 0.680628118  | 1.59E-13  | 3.351289  | --      | --  | --       |
| 3818047 | SCDR10     | NM_198707    | 10.47001 | 0.180606082 | 0.720101637  | 1.33E-15  | 7.4093342 | 1.0E-13 | 1.8 | 2.0E-16  |
| 3706700 | CTNS       | NM_004937    | 10.47521 | 0.180598494 | 0.696013427  | 2.64E-14  | 6.0385408 | 3.2E-18 | 1.6 | 6.6E-04  |
| 2723997 | KLF3       | NM_016531    | 18.90261 | 0.179990927 | -0.76638916  | 1.34E-18  | 8.1156376 | 1.2E-04 | 1.4 | 8.2E-01  |
| 2827709 | ISOC1      | NM_016048    | 19.39796 | 0.179919856 | 0.7262199    | 4.44E-16  | 7.4143349 | 3.3E-18 | 2.5 | 1.3E-10  |
| 3226844 | CRAT       | NM_004003    | 17.46399 | 0.179204401 | 0.635382904  | 1.73E-11  | 7.7393124 | 3.0E-08 | 1.4 | 1.1E-09  |
| 2877990 | LOC340061  | NM_198282    | 22.82061 | 0.17834638  | 0.767439639  | 0         | 6.4504641 | 2.3E-15 | 1.9 | 1.6E-17  |
| 2605735 | HE56       | NM_018645    | 10.72737 | 0.176945558 | -0.722914471 | 8.62E-16  | 7.889413  | 2.0E-08 | 2.1 | 3.4E-05  |
| 2947283 | ZNF96      | NM_014724    | 17.90638 | 0.176437705 | -0.725205383 | 6.33E-16  | 6.4282564 | 4.9E-03 | 1.2 | 8.3E-04  |
| 3865998 | FLJ10781   | NM_018215    | 12.0319  | 0.175611632 | 0.699206869  | 1.78E-14  | 7.8815213 | 1.8E-09 | 1.3 | 2.0E-02  |
| 3133135 | MYST3      | NM_006766    | 8.662727 | 0.175605471 | -0.720970642 | 1.12E-15  | 8.7664996 | 3.1E-05 | 1.4 | 1.4E-05  |
| 2533227 | TRPM8      | NM_024080    | 11.96567 | 0.175529373 | 0.697684418  | 2.15E-14  | 4.2476232 | 7.5E-27 | 2.0 | 9.4E-52  |
| 2587790 | GPR155     | NM_152529    | 28.23304 | 0.175203726 | 0.602837238  | 3.24E-10  | 7.0363568 | 3.6E-15 | 2.0 | 1.5E-27  |
| 3113180 | LOC440258  | NM_001013702 | 12.94217 | 0.175159078 | 0.726626213  | 4.44E-16  | 9.0390929 | 3.3E-17 | 3.7 | 1.2E-01  |
| 3656855 | MYST1      | NM_032188    | 7.480537 | 0.174322954 | -0.677930246 | 2.15E-13  | 7.8695472 | 1.8E-06 | 1.2 | 2.0E-04  |
| 3160175 | VLDLR      | NM_001018056 | 24.67016 | 0.172875141 | -0.72700351  | 4.95E-16  | 8.7624859 | 7.2E-13 | 1.9 | 7.5E-23  |
| 3122489 | ANGPT2     | NM_001147    | 7.824683 | 0.171201554 | 0.359156272  | 0.0005082 | 5.7011994 | 2.1E-28 | 3.8 | 3.6E-35  |
| 3656800 | ZNF646     | NM_014699    | 26.83574 | 0.170971538 | -0.688639323 | 6.32E-14  | 6.7015019 | 8.3E-11 | 1.4 | 1.7E-02  |
| 2620194 | ZNF35      | NM_003420    | 23.96696 | 0.170566357 | -0.716160319 | 2.11E-15  | 6.9435712 | 2.0E-07 | 1.3 | 2.1E-04  |
| 2673594 | CELSR3     | NM_001407    | 23.7666  | 0.170450178 | -0.669206444 | 5.60E-13  | 8.1570318 | 2.0E-09 | 1.4 | 3.3E-05  |
| 3598613 | MGC4562    | NM_133375    | 22.2657  | 0.169570624 | 0.626676214  | 3.92E-11  | 7.9181321 | 2.3E-05 | 1.4 | 4.2E-02  |
| 3384321 | RAB30      | NM_014488    | 13.36731 | 0.169103738 | 0.703917778  | 9.99E-15  | 7.8192985 | 4.2E-07 | 1.5 | 1.8E-01  |
| 2685776 | MINA       | NM_032778    | 17.3502  | 0.169018674 | 0.674770931  | 3.05E-13  | 6.2157352 | 1.3E-14 | 2.1 | 2.1E-32  |
| 2995765 | LOC223075  | NM_194300    | 16.84934 | 0.168597852 | -0.725325973 | 6.22E-16  | 4.7342563 | --      | --  | --       |
| 3475324 | RHOF       | NM_019034    | 10.87975 | 0.168189764 | 0.73949124   | 0         | 6.2412503 | 6.5E-13 | 1.9 | 4.1E-03  |
| 3033397 | PRR8       | NM_053043    | 22.59457 | 0.168066964 | -0.724686191 | 6.79E-16  | 7.0297596 | 9.3E-09 | 1.4 | 2.1E-05  |
| 3983105 | CXorf33    | NM_198450    | 16.61525 | 0.167595781 | 0.686607693  | 7.99E-14  | 7.367332  | 5.3E-08 | 1.7 | 2.5E-05  |
| 3226160 | ST6GALNAC6 | NM_013443    | 13.53889 | 0.167040897 | 0.742798614  | 0         | 8.5618397 | 3.7E-13 | 1.6 | 1.5E-03  |
| 3447348 | SOX5       | NM_178010    | 54.72702 | 0.166827804 | -0.66248768  | 1.15E-12  | 9.2805102 | 1.7E-31 | 5.0 | 2.6E-166 |
| 3260937 | PEO1       | NM_021830    | 10.05284 | 0.166177447 | -0.662250607 | 1.18E-12  | 6.4642557 | --      | --  | --       |
| 3863060 | EXOSC5     | NM_020158    | 14.04135 | 0.165736187 | -0.601241313 | 3.70E-10  | 7.2783282 | 6.7E-07 | 1.5 | 5.2E-02  |
| 2711225 | ATP13A4    | NM_032279    | 18.93153 | 0.16568703  | 0.681576027  | 1.42E-13  | 5.2319017 | 4.1E-17 | 1.7 | 2.5E-40  |
| 3980170 | EFNB1      | NM_004429    | 8.681606 | 0.165525782 | -0.684139881 | 1.06E-13  | 7.6511152 | 5.8E-06 | 1.7 | 2.0E-16  |

Y (GO BP)

|         |                  |                 |          |             |                     |           |           |          |     |         |
|---------|------------------|-----------------|----------|-------------|---------------------|-----------|-----------|----------|-----|---------|
| 3577360 | PRIMA1           | NM_178004       | 8.187237 | 0.165417227 | 0.708410615         | 5.77E-15  | 5.1461358 | --       | --  |         |
| 3411721 | CNTN1            | NM_175038       | 9.88995  | 0.164780953 | 0.626179083         | 4.10E-11  | 10.269956 | 1.0E-04  | 1.9 | 5.7E-05 |
| 3768703 | ABCA9            | NM_172386       | 18.96986 | 0.164437309 | 0.721109235         | 1.11E-15  | 4.1238693 | 4.0E-23  | 1.4 | 3.5E-37 |
| 3302886 | HPSE2            | NM_021828       | 6.059331 | 0.164305036 | 0.662663714         | 1.13E-12  | 4.3259839 | 6.5E-22  | 2.2 | 1.2E-42 |
| 3615579 | TJP1             | NM_003257       | 23.74096 | 0.164113602 | 0.62025131          | 7.05E-11  | 7.7420177 | 5.2E-07  | 1.8 | 1.6E-18 |
| 3764527 |                  | 4-Sep NM_080416 | 6.694997 | 0.163669849 | 0.637686797         | 1.39E-11  | 7.1442875 | 2.3E-23  | 3.4 | 2.6E-72 |
| 3056044 | <b>BAZ1B</b>     | NM_023005       | 12.69355 | 0.163419083 | <b>-0.716989845</b> | 1.89E-15  | 8.2662875 | 4.7E-04  | 1.4 | 1.7E-03 |
| 3768880 | ABCA10           | NM_080282       | 8.936482 | 0.163039655 | 0.722769992         | 8.88E-16  | 3.7197768 | 6.4E-10  | 1.5 | 7.8E-14 |
| 3740264 | <b>MYO1C</b>     | NM_033375       | 13.48188 | 0.162776385 | <b>-0.680336006</b> | 1.64E-13  | 7.5291189 | 2.8E-05  | 1.2 | 5.1E-02 |
| 2505957 | PLEKHB2          | NM_017958       | 9.490481 | 0.16164052  | 0.716617002         | 2.00E-15  | 8.4013402 | 5.1E-08  | 2.2 | 6.1E-48 |
| 3841102 | PRKCG            | NM_002739       | 14.33527 | 0.158785362 | 0.725660757         | 4.44E-16  | 6.6665069 | 2.7E-24  | 2.1 | 5.1E-79 |
| 3191724 | <b>ABL1</b>      | NM_007313       | 7.617227 | 0.156130044 | <b>-0.623636149</b> | 5.18E-11  | 8.6648618 | 1.0E-05  | 1.6 | 4.9E-02 |
| 3110395 | RPS6             | NM_001010       | 12.80577 | 0.155873937 | 0.710612949         | 4.44E-15  | 7.677233  | 2.4E-20  | 2.6 | 1.2E-26 |
| 2888010 | DRD1             | NM_000794       | 4.775274 | 0.155293638 | 0.086782045         | 0.4160475 | 5.8155801 | 4.4E-32  | 3.7 | 5.9E-17 |
| 2428760 | <b>RSBN1</b>     | NM_018364       | 16.04322 | 0.154806421 | <b>-0.708448961</b> | 5.69E-15  | 8.3571694 | 1.5E-04  | 1.4 | 1.4E-06 |
| 3832992 | <b>PLEKHG2</b>   | NM_022835       | 22.44864 | 0.153350247 | <b>-0.625854207</b> | 4.23E-11  | 7.3842081 | 2.7E-09  | 1.4 | 3.3E-10 |
| 3648391 | LOC441749        | XM_497487       | 4.547778 | 0.15300144  | 0.186662506         | 0.0781368 | 0.0781368 | 2.993692 | --  | --      |
| 3380901 | <b>NUMA1</b>     | NM_006185       | 7.306009 | 0.152797675 | <b>-0.574413087</b> | 3.23E-09  | 8.3957037 | 9.5E-10  | 1.7 | 5.3E-07 |
| 3746845 | CDRT1            | NM_006382       | 9.4423   | 0.152504084 | 0.747016381         | 0         | 7.3176999 | 2.0E-12  | 1.6 | 9.3E-29 |
| 3940099 | ADORA2A          | NM_000675       | 6.265492 | 0.15213379  | 0.270639508         | 0.0098811 | 6.6774931 | 1.6E-22  | 2.4 | 1.4E-14 |
| 3050367 | <b>FIGL1</b>     | NM_022116       | 34.8319  | 0.151933499 | <b>-0.664607228</b> | 9.16E-13  | 6.8166148 | --       | --  | --      |
| 3990927 | FLJ30058         | NM_144967       | 6.938835 | 0.151468655 | 0.327990813         | 0.0016001 | 4.5240822 | 3.6E-25  | 2.5 | 1.1E-64 |
| 3484497 | 13CDNA73         | NM_023037       | 10.15023 | 0.150636494 | 0.675343747         | 2.86E-13  | 8.8123775 | 1.5E-05  | 1.8 | 4.2E-04 |
| 2427566 | KCNA2            | NM_004974       | 15.62736 | 0.150371817 | 0.738923252         | 0         | 6.4985212 | 3.1E-18  | 1.7 | 1.5E-27 |
| 2436985 | LOC440232        | XM_496036       | 11.24088 | 0.149312565 | 0.667677541         | 6.60E-13  | 6.7574969 | 1.5E-25  | 2.0 | 1.1E-59 |
| 2619405 | ZNF651           | NM_145166       | 9.499884 | 0.149139332 | 0.658493769         | 1.74E-12  | 7.4094055 | 8.3E-06  | 1.4 | 7.9E-01 |
| 3356539 | HNT              | NM_016522       | 7.278308 | 0.149098764 | 0.711534718         | 4.00E-15  | 8.462682  | 1.7E-15  | 2.2 | 2.3E-24 |
| 3442205 | <b>ZNF384</b>    | NM_133476       | 7.31071  | 0.148988432 | <b>-0.627251994</b> | 3.72E-11  | 8.1283545 | 3.3E-05  | 1.3 | 3.9E-02 |
| 3721956 | TUBG2            | NM_016437       | 10.20198 | 0.147108391 | 0.718348363         | 1.55E-15  | 8.242078  | 2.5E-09  | 1.4 | 8.1E-10 |
| 3860208 | MGC15677         | NM_198867       | 9.919909 | 0.14662751  | 0.744339182         | 0         | 6.8990601 | 1.5E-12  | 1.6 | 1.6E-05 |
| 2437801 | <b>ARHGEF2</b>   | NM_004723       | 11.34524 | 0.14511026  | <b>-0.692345997</b> | 4.09E-14  | 8.0113917 | 2.4E-07  | 1.3 | 5.9E-03 |
| 3944210 | RASD2            | NM_014310       | 8.273253 | 0.144855953 | 0.576753094         | 2.69E-09  | 6.5870695 | --       | --  | --      |
| 2454140 | KCNH1            | NM_172362       | 7.68537  | 0.144751428 | 0.333006673         | 0.0013409 | 6.0829656 | 1.0E-25  | 2.9 | 1.2E-34 |
| 3577246 | MOAP1            | NM_022151       | 8.98065  | 0.143588103 | 0.747580971         | 0         | 8.7822871 | 2.5E-11  | 1.9 | 1.7E-02 |
| 3896976 | DJ971N18.2       | NM_021156       | 6.986884 | 0.14321616  | 0.731564652         | 2.22E-16  | 9.1534047 | 3.1E-08  | 2.0 | 9.2E-02 |
| 2682271 | PROK2            | NM_021935       | 8.260519 | 0.143175498 | 0.593530788         | 7.04E-10  | 6.783246  | 6.8E-22  | 2.2 | 1.3E-36 |
| 3885537 | <b>PLCG1</b>     | NM_002660       | 9.826641 | 0.142574022 | <b>-0.571019133</b> | 4.18E-09  | 8.5649877 | 8.5E-04  | 1.3 | 3.2E-03 |
| 2663396 | IQSEC1           | NM_014869       | 13.157   | 0.141313832 | 0.695812305         | 2.71E-14  | 7.5627083 | 2.0E-12  | 1.7 | 5.7E-07 |
| 3469597 | <b>NUAK1</b>     | NM_014840       | 16.04039 | 0.141222105 | <b>-0.71366521</b>  | 2.93E-15  | 8.3141394 | 2.0E-17  | 1.9 | 3.7E-26 |
| 2685354 | <b>DHFR1L1</b>   | NM_176815       | 13.88191 | 0.140760487 | <b>-0.736253013</b> | 1.36E-16  | 6.0366521 | 2.4E-02  | 1.3 | 1.7E-21 |
| 3893849 | <b>C20orf14</b>  | NM_012469       | 7.865397 | 0.140354718 | <b>-0.597600611</b> | 5.03E-10  | 8.3845349 | 8.7E-03  | 1.3 | 2.1E-09 |
| 2774971 | <b>ANTXR2</b>    | NM_058172       | 13.02459 | 0.140152316 | <b>-0.749367959</b> | 1.97E-17  | 6.7417707 | 2.8E-09  | 2.1 | 8.7E-37 |
| 3764066 | <b>ZNF161</b>    | NM_007146       | 8.0708   | 0.140045999 | <b>-0.708167296</b> | 5.90E-15  | 9.1102601 | 1.1E-05  | 1.5 | 6.0E-04 |
| 2906607 | <b>NFYA</b>      | NM_002505       | 5.38227  | 0.139365558 | <b>-0.618731653</b> | 8.08E-11  | 8.5433601 | 3.3E-17  | 2.6 | 6.3E-36 |
| 3512719 | <b>LOC283514</b> | NM_198849       | 7.842722 | 0.138528584 | <b>-0.705070553</b> | 8.70E-15  | 8.039671  | --       | --  | --      |
| 3896621 | C20orf42         | NM_017671       | 5.148213 | 0.137921201 | 0.412935632         | 5.24E-05  | 4.3670643 | 8.6E-25  | 1.5 | 8.1E-13 |
| 3362159 | NRIP3            | NM_020645       | 10.59488 | 0.137905936 | 0.652967195         | 3.07E-12  | 7.0420478 | 1.0E-19  | 4.5 | 6.8E-50 |
| 3924041 | ADARB1           | NM_001112       | 5.973935 | 0.137851449 | 0.629128245         | 3.12E-11  | 7.6557952 | 1.2E-17  | 2.1 | 8.8E-19 |
| 3295376 | ZNF503           | NM_032772       | 5.391328 | 0.137135334 | 0.336487266         | 0.0011841 | 6.1370396 | 1.7E-21  | 1.8 | 7.4E-31 |
| 3329404 | <b>KIAA0652</b>  | NM_014741       | 8.308785 | 0.136327568 | <b>-0.714736039</b> | 2.54E-15  | 8.7968422 | 9.6E-06  | 1.3 | 5.2E-04 |
| 3249369 | LRRTM3           | NM_178011       | 9.721388 | 0.136259092 | 0.722420876         | 8.88E-16  | 9.0531787 | 9.6E-10  | 2.1 | 5.4E-04 |
| 2927967 | <b>C6orf115</b>  | XM_371848       | 40.42797 | 0.135901622 | <b>-0.674712552</b> | 3.07E-13  | 6.8540151 | --       | --  | --      |
| 3447694 | BCAT1            | NM_005504       | 9.236125 | 0.135798606 | 0.674966537         | 2.98E-13  | 7.8753352 | 2.6E-08  | 2.1 | 5.0E-20 |
| 3695157 | CKLFSF4          | NM_181521       | 8.533587 | 0.135084308 | 0.68448344          | 1.02E-13  | 8.057909  | 1.3E-05  | 1.4 | 3.2E-01 |
| 2900372 | <b>ZNF193</b>    | NM_006299       | 14.94825 | 0.134551626 | <b>-0.685200347</b> | 9.41E-14  | 6.8689098 | 1.8E-06  | 1.4 | 1.0E-01 |
| 2562529 | ST3GAL5          | NM_003896       | 35.76006 | 0.134421506 | 0.692350171         | 4.09E-14  | 8.1121228 | 1.5E-19  | 2.5 | 9.2E-06 |
| 2666807 | NEK10            | NM_152534       | 10.16741 | 0.133277427 | 0.534017326         | 5.95E-08  | 5.5603582 | 5.7E-19  | 1.9 | 1.3E-33 |
| 3378411 | <b>RBM30</b>     | NM_031492       | 13.63272 | 0.132976298 | <b>-0.721852322</b> | 9.95E-16  | 9.9751309 | --       | --  | --      |
| 2350818 | GPR61            | NM_031936       | 8.168598 | 0.132353681 | 0.761959409         | 0         | 6.3856346 | 1.1E-12  | 1.6 | 6.3E-05 |
| 2993206 | <b>MPP6</b>      | NM_016447       | 29.20135 | 0.132164278 | <b>-0.670238533</b> | 5.01E-13  | 9.5671887 | 2.7E-06  | 1.7 | 3.7E-06 |
| 2623154 | <b>RBM15B</b>    | NM_013286       | 8.078469 | 0.131813437 | <b>-0.649023139</b> | 4.57E-12  | 8.0547893 | 9.6E-04  | 1.5 | 1.4E-04 |
| 2438458 | CRABP2           | NM_001878       | 13.66487 | 0.131188925 | 0.61127895          | 1.56E-10  | 5.4303839 | --       | --  | --      |
| 3911217 | TMEM41           | NM_020182       | 6.864983 | 0.131075209 | 0.425392555         | 2.92E-05  | 7.4491294 | 1.4E-22  | 2.6 | 9.0E-26 |
| 2843091 | RGS14            | NM_006480       | 8.161373 | 0.130790918 | 0.413917237         | 5.01E-05  | 7.2114946 | 1.2E-29  | 2.0 | 1.1E-18 |
| 3394264 | MCAM             | NM_006500       | 5.743912 | 0.130773531 | 0.36544542          | 0.0003974 | 6.0531715 | 2.3E-16  | 2.2 | 3.5E-14 |
| 3846238 | C19orf28         | NM_174983       | 20.54916 | 0.130259346 | 0.615141979         | 1.11E-10  | 7.106177  | 3.2E-10  | 1.5 | 9.1E-04 |
| 2545681 | <b>GTF3C2</b>    | NM_001521       | 6.016467 | 0.130116318 | <b>-0.685377365</b> | 9.22E-14  | 7.8225018 | --       | --  | --      |
| 3371537 | CHRM4            | NM_000741       | 7.943294 | 0.129889385 | 0.507732462         | 3.26E-07  | 6.0561413 | --       | --  | --      |
| 3435902 | <b>DDX55</b>     | NM_020936       | 17.89516 | 0.129738586 | <b>-0.709320334</b> | 5.10E-15  | 6.9643937 | 8.6E-05  | 1.3 | 1.6E-01 |
| 3665116 | <b>CBFB</b>      | NM_001755       | 8.499302 | 0.129513019 | <b>-0.639764176</b> | 1.14E-11  | 8.5669308 | 5.1E-07  | 1.9 | 3.3E-01 |
| 3851514 | <b>ZNF490</b>    | NM_020714       | 13.72749 | 0.129029518 | <b>-0.700682209</b> | 1.50E-14  | 7.4160973 | 1.6E-05  | 1.3 | 8.9E-02 |
| 2330234 | <b>TEKT2</b>     | NM_014466       | 13.73348 | 0.128990884 | <b>-0.665630677</b> | 8.22E-13  | 6.6994183 | 7.3E-15  | 1.6 | 3.6E-03 |
| 2762500 | <b>MLR1</b>      | NM_153686       | 18.64543 | 0.128278115 | <b>-0.707952394</b> | 6.06E-15  | 7.7429261 | 6.7E-07  | 1.6 | 2.7E-08 |
| 2468105 | FLJ30594         | AL713643        | 13.04388 | 0.127691389 | 0.670628318         | 4.80E-13  | 7.8707486 | 9.8E-18  | 2.2 | 7.3E-01 |
| 2408855 | <b>FOXJ3</b>     | NM_014947       | 21.88579 | 0.127288391 | <b>-0.597014567</b> | 5.28E-10  | 8.7369703 | 3.9E-06  | 1.4 | 3.6E-03 |
| 3383081 | <b>LOC441243</b> | XM_376622       | 10.97018 | 0.126888009 | <b>-0.757179644</b> | 5.89E-18  | 6.8208604 | 9.4E-04  | 1.3 | 2.6E-03 |
| 3760137 | <b>LOC440442</b> | XM_498671       | 13.47381 | 0.125952041 | <b>-0.609870676</b> | 1.77E-10  | 8.7981373 | 3.8E-06  | 1.3 | 3.3E-06 |
| 3085403 | <b>MSRA</b>      | NM_012331       | 8.725864 | 0.125900987 | <b>-0.731098152</b> | 2.81E-16  | 8.9393492 | 1.8E-13  | 2.4 | 1.6E-04 |
| 2563654 | <b>EIF2AK3</b>   | NM_004836       | 22.25833 | 0.125302347 | <b>-0.664235889</b> | 9.53E-13  | 6.8734937 | 2.9E-03  | 1.2 | 1.7E-03 |
| 2764004 | LGI2             | NM_018176       | 7.707663 | 0.124789151 | 0.712701171         | 3.33E-15  | 6.6043471 | 1.5E-13  | 3.4 | 1.7E-23 |
| 3894322 | SRXN1            | NM_080725       | 8.072664 | 0.12352669  | 0.715489869         | 2.22E-15  | 7.4785293 | 1.8E-09  | 1.7 | 2.0E-02 |
| 2908100 | <b>POLH</b>      | NM_006502       | 18.51317 | 0.122464946 | <b>-0.669912265</b> | 5.19E-13  | 7.1412689 | 3.5E-01  | 1.1 | 7.7E-06 |
| 3558012 | <b>TINF2</b>     | NM_012461       | 6.404942 | 0.122462851 | <b>-0.669614221</b> | 5.36E-13  | 7.8393367 | 3.1E-05  | 1.4 | 3.9E-04 |
| 3933923 | <b>CBS</b>       | NM_000071       | 4.45087  | 0.121687594 | <b>-0.158061407</b> | 0.1367741 | 8.6726374 | 3.0E-20  | 3.6 | 3.8E-51 |
| 3030489 | <b>KIAA0543</b>  | XM_376720       | 11.25737 | 0.121006203 | <b>-0.622305459</b> | 5.85E-11  | 7.3237185 | --       | --  | --      |

Y (KEGG)

|         |                  |              |          |             |                     |           |           |         |     |          |
|---------|------------------|--------------|----------|-------------|---------------------|-----------|-----------|---------|-----|----------|
| 3982975 | POU3F4           | NM_000307    | 4.834573 | 0.120890728 | 0.176792068         | 0.0955323 | 6.4458565 | 1.1E-17 | 2.8 | 3.4E-14  |
| 3742727 | <b>DHX33</b>     | NM_020162    | 9.1636   | 0.120695784 | <b>-0.659724603</b> | 1.53E-12  | 7.2384742 | --      | --  | --       |
| 2711205 | ATP13A4          | NM_032279    | 10.01574 | 0.120379153 | 0.629917409         | 2.90E-11  | 4.8376479 | 6.6E-16 | 1.8 | 2.5E-03  |
| 2992197 | <b>SP4</b>       | NM_003112    | 7.753044 | 0.119725094 | <b>-0.651012898</b> | 3.74E-12  | 8.7619751 | 3.8E-06 | 1.6 | 6.7E-02  |
| 3376023 | <b>LOC51035</b>  | NM_015853    | 5.994285 | 0.119102275 | <b>-0.626062366</b> | 4.15E-11  | 6.9358111 | 9.9E-05 | 1.3 | 8.8E-05  |
| 2329266 | <b>FLJ25476</b>  | NM_152493    | 9.238909 | 0.118515339 | <b>-0.650832839</b> | 3.81E-12  | 9.2171546 | 3.0E-08 | 2.0 | 1.1E-08  |
| 2531908 | B3GNT7           | NM_145236    | 5.060424 | 0.117109551 | 0.613837412         | 1.25E-10  | 6.0988236 | --      | --  | --       |
| 3892067 | <b>LOC128629</b> | XM_066069    | 5.272761 | 0.117004993 | <b>-0.664106474</b> | 9.66E-13  | 8.1582247 | 2.9E-09 | 2.2 | 3.4E-10  |
| 3078774 | ZNF467           | NM_207336    | 6.121738 | 0.116493577 | 0.404579977         | 7.65E-05  | 6.5589448 | 7.5E-21 | 1.7 | 2.3E-24  |
| 2648677 | MME              | NM_007289    | 3.904568 | 0.116407179 | 0.323268895         | 0.0018847 | 4.4153236 | 3.8E-24 | 4.4 | 6.3E-129 |
| 3381607 | RAB6C            | NM_032144    | 5.170905 | 0.116207697 | 0.63708442          | 1.47E-11  | 9.4707682 | 2.7E-06 | 1.9 | 5.7E-09  |
| 3557106 | <b>ACIN1</b>     | NM_014977    | 4.914292 | 0.115320882 | <b>-0.600724577</b> | 3.87E-10  | 7.8053867 | 4.3E-04 | 1.3 | 1.9E-08  |
| 3962494 | <b>POLDIP3</b>   | NM_032311    | 5.15276  | 0.115241931 | <b>-0.594933736</b> | 6.27E-10  | 9.2659332 | 1.5E-06 | 1.6 | 4.1E-03  |
| 3616216 | LOC440261        | XM_496059    | 24.4022  | 0.114666977 | 0.671611161         | 4.31E-13  | 6.7576315 | 7.0E-20 | 1.8 | 1.7E-09  |
| 3893458 | C20orf149        | NM_024299    | 10.03705 | 0.114629119 | 0.614211464         | 1.21E-10  | 9.03846   | 6.6E-11 | 2.0 | 4.2E-02  |
| 2830465 | TTID             | NM_006790    | 3.763329 | 0.113837373 | 0.574875991         | 3.11E-09  | 4.0009415 | 2.2E-25 | 1.7 | 2.1E-17  |
| 3774906 | SECTM1           | NM_003004    | 7.072262 | 0.113082652 | 0.187231251         | 0.0772174 | 6.1327003 | 2.6E-22 | 2.2 | 8.0E-10  |
| 3880467 | <b>C20orf39</b>  | NM_024893    | 6.427704 | 0.112726606 | <b>-0.671986396</b> | 4.14E-13  | 7.123208  | 6.5E-10 | 2.4 | 4.2E-02  |
| 3133434 | CHRNA6           | NM_004198    | 6.499999 | 0.111336531 | 0.65856715          | 1.73E-12  | 4.0060649 | --      | --  | --       |
| 3624003 | CYP19A1          | NM_031226    | 5.252568 | 0.110689993 | 0.695347322         | 2.84E-14  | 4.0124747 | --      | --  | --       |
| 2343025 | AK5              | NM_174858    | 10.30344 | 0.110642228 | 0.616091527         | 1.02E-10  | 7.3228985 | 1.6E-18 | 4.1 | 1.6E-13  |
| 3016768 | LOC402578        | XM_380135    | 6.740203 | 0.110322781 | 0.680384529         | 1.63E-13  | 7.402223  | 6.9E-09 | 1.6 | 4.1E-02  |
| 2616804 | STAC             | NM_003149    | 4.510117 | 0.109657059 | 0.61935579          | 7.64E-11  | 5.7326155 | 1.1E-16 | 2.6 | 2.0E-24  |
| 3378210 | <b>BRMS1</b>     | NM_001024958 | 6.181799 | 0.109425075 | <b>-0.626318099</b> | 4.05E-11  | 6.6259122 | 4.4E-02 | 1.4 | 2.8E-04  |
| 3957589 | <b>MORC2</b>     | NM_014941    | 6.181456 | 0.10939883  | <b>-0.59505839</b>  | 6.23E-10  | 7.977083  | 1.6E-03 | 1.2 | 1.4E-03  |
| 3402039 | KCNA5            | NM_002234    | 5.53646  | 0.109203052 | 0.443812436         | 1.18E-05  | 6.4836001 | 4.1E-17 | 1.5 | 1.8E-11  |
| 3636391 | HOMER2           | NM_199331    | 5.856344 | 0.109019475 | 0.564958936         | 6.61E-09  | 7.5437938 | 1.4E-21 | 4.3 | 8.1E-14  |
| 3242353 | CREM             | NM_183012    | 5.641718 | 0.108688247 | 0.375113926         | 0.0002696 | 4.7265685 | 2.6E-21 | 2.0 | 5.1E-26  |
| 3157311 | LY6H             | NM_002347    | 8.39218  | 0.108342097 | 0.653233032         | 2.99E-12  | 8.334988  | --      | --  | --       |
| 2666884 | NEK10            | NM_152534    | 7.232986 | 0.108128933 | 0.494636255         | 7.22E-07  | 6.4384119 | 7.9E-17 | 2.0 | 1.6E-33  |
| 3432394 | RPH3A            | NM_014954    | 8.145208 | 0.108039059 | 0.673469051         | 3.52E-13  | 6.3403014 | 2.8E-11 | 1.8 | 2.8E-18  |
| 3531553 | AKAP6            | NM_004274    | 5.30384  | 0.107977378 | 0.739141859         | 0         | 7.5890887 | --      | --  | --       |
| 3988638 | RNF127           | NM_024778    | 12.19034 | 0.107820679 | 0.671632206         | 4.30E-13  | 5.1975667 | 2.6E-20 | 2.2 | 7.4E-14  |
| 3412345 | DKFZp434K2435    | NM_032256    | 9.785258 | 0.107513485 | 0.578205479         | 2.40E-09  | 6.816024  | 8.1E-07 | 1.4 | 1.0E+00  |
| 3076076 | <b>SLC37A3</b>   | NM_207113    | 15.01934 | 0.106873983 | <b>-0.677214318</b> | 2.32E-13  | 8.9791004 | 2.3E-07 | 1.5 | 1.3E-03  |
| 3381540 | KIAA0280         | XM_370635    | 7.531116 | 0.106451125 | 0.645980229         | 6.19E-12  | 9.2203151 | 3.2E-10 | 1.7 | 2.3E-02  |
| 3334884 | TM7SF2           | NM_003273    | 12.15318 | 0.106380152 | 0.596906856         | 5.33E-10  | 8.193151  | 3.6E-10 | 1.6 | 2.5E-06  |
| 2982319 | SOD2             | NM_000636    | 7.043006 | 0.10568409  | 0.702883641         | 1.15E-14  | 7.5711622 | 4.9E-10 | 2.1 | 2.7E-14  |
| 3561381 | TITF1            | NM_003317    | 3.700817 | 0.104600972 | 0.151424986         | 0.1542461 | 5.0546395 | 4.5E-27 | 3.2 | 6.5E-69  |
| 3613338 | NIPA1            | NM_144599    | 6.042327 | 0.103456284 | 0.66414456          | 9.62E-13  | 8.7282245 | 3.8E-05 | 1.5 | 2.4E-12  |
| 3451375 | PRICKLE1         | NM_153026    | 3.523626 | 0.103131557 | 0.500991827         | 4.93E-07  | 7.5674579 | 4.3E-29 | 3.5 | 1.2E-22  |
| 3834257 | CEACAM21         | NM_033543    | 4.546418 | 0.102287631 | 0.646897565         | 5.65E-12  | 5.1461383 | 4.0E-24 | 1.7 | 3.7E-50  |
| 2318086 | KCNAB2           | NM_003636    | 7.282628 | 0.102269777 | 0.624646892         | 4.72E-11  | 7.4879991 | 3.1E-10 | 1.6 | 2.4E-04  |
| 2363444 | <b>USP21</b>     | NM_001014443 | 9.412907 | 0.102236194 | <b>-0.693341384</b> | 3.63E-14  | 8.1206901 | 7.6E-03 | 1.4 | 2.7E-08  |
| 3961981 | POLR3H           | NM_001018052 | 10.41212 | 0.10212846  | 0.628631127         | 3.27E-11  | 8.1615071 | 1.4E-08 | 1.4 | 3.4E-05  |
| 2544164 | <b>FLJ21945</b>  | NM_025203    | 8.567708 | 0.101890707 | <b>-0.67795438</b>  | 2.14E-13  | 7.2359232 | --      | --  | --       |
| 3971219 | <b>CNKSR2</b>    | NM_014927    | 8.405802 | 0.100828341 | <b>-0.657207603</b> | 1.99E-12  | 8.5184136 | 9.7E-13 | 2.5 | 2.2E-36  |
| 3415812 | <b>LOC283337</b> | NM_001004304 | 5.735634 | 0.100434298 | <b>-0.70609853</b>  | 7.74E-15  | 7.7326042 | 2.0E-05 | 1.3 | 4.2E-01  |
| 2546874 | CAPN14           | NM_496548    | 3.603438 | 0.099142193 | 0.571968849         | 3.89E-09  | 6.8452986 | 2.3E-23 | 3.5 | 8.4E-18  |
| 2868131 | ARTS-1           | NM_016442    | 20.57853 | 0.09841164  | 0.578908486         | 2.28E-09  | 6.5321352 | 2.3E-13 | 1.5 | 2.9E-06  |
| 3733275 | KCNJ2            | NM_000891    | 3.225053 | 0.09839551  | 0.236031048         | 0.0251148 | 5.574626  | 5.2E-31 | 3.4 | 1.1E-20  |
| 3328600 | <b>SPAN18</b>    | NM_130783    | 3.757945 | 0.09826317  | <b>-0.320536829</b> | 0.0020695 | 8.8275608 | 1.8E-22 | 5.4 | 3.8E-17  |
| 3980329 | TMEM28           | NM_015686    | 3.487858 | 0.097726012 | 0.153942203         | 0.1474325 | 7.3167648 | 5.8E-20 | 1.6 | 1.9E-19  |
| 3294816 | <b>NDST2</b>     | NM_003635    | 10.24952 | 0.097360885 | <b>-0.608481018</b> | 1.99E-10  | 7.6617415 | 4.4E-04 | 1.2 | 2.6E-01  |
| 3588658 | TPM3             | NM_153649    | 3.404648 | 0.097173411 | 0.096576828         | 0.3651899 | 7.5129692 | 4.0E-18 | 2.1 | 2.0E-02  |
| 3376155 | <b>NXF1</b>      | NM_006362    | 3.846137 | 0.097019044 | <b>-0.588253851</b> | 1.08E-09  | 8.950348  | 8.3E-05 | 1.5 | 2.8E-05  |
| 2623180 | <b>SRISNF2L</b>  | NM_015106    | 9.325583 | 0.096593971 | <b>-0.64586639</b>  | 6.26E-12  | 7.9310319 | 5.1E-05 | 1.3 | 8.0E-04  |
| 3661940 | GNAO1            | NM_020988    | 7.468947 | 0.096192609 | 0.624785181         | 4.66E-11  | 10.339326 | 8.3E-06 | 1.7 | 1.2E-09  |
| 2857488 | LOC389347        | XM_371783    | 10.95572 | 0.09617284  | 0.537301558         | 4.76E-08  | 4.4340851 | --      | --  | --       |
| 2695295 | <b>HT001</b>     | NM_014065    | 13.82701 | 0.095407159 | <b>-0.690515548</b> | 5.07E-14  | 5.9607204 | --      | --  | --       |
| 3375340 | <b>FLJ12529</b>  | NM_024811    | 4.049111 | 0.094637115 | <b>-0.444130992</b> | 1.16E-05  | 8.1136311 | 2.5E-03 | 1.3 | 1.6E-05  |
| 2763550 | PPARGC1A         | NM_013261    | 10.26716 | 0.093909722 | 0.646046423         | 6.15E-12  | 5.9789466 | 2.0E-14 | 2.1 | 1.2E-38  |
| 2384401 | <b>RHOJ</b>      | NM_021205    | 16.11589 | 0.093737046 | <b>-0.524721</b>    | 1.10E-07  | 8.4438094 | 3.9E-13 | 2.2 | 2.0E-02  |
| 2954678 | <b>XPO5</b>      | NM_020750    | 8.286531 | 0.093626756 | <b>-0.621134119</b> | 6.51E-11  | 8.0182301 | 4.0E-01 | 1.2 | 1.5E-04  |
| 3701433 | C16orf46         | NM_152337    | 4.976936 | 0.093195488 | 0.707936987         | 6.22E-15  | 5.779431  | 3.9E-10 | 1.7 | 1.7E-07  |
| 2948425 | <b>PPP1R10</b>   | NM_002714    | 4.928105 | 0.091221597 | <b>-0.622618085</b> | 5.69E-11  | 8.4009542 | 1.2E-03 | 1.3 | 6.7E-04  |
| 2901660 | <b>PRR3</b>      | NM_025263    | 3.773252 | 0.089463027 | <b>-0.657715465</b> | 1.89E-12  | 8.1369502 | --      | --  | --       |
| 2947572 | <b>RFP</b>       | NM_030950    | 9.079949 | 0.088780799 | <b>-0.619176608</b> | 7.76E-11  | 8.0407715 | 4.2E-03 | 1.1 | 1.3E-13  |
| 2621705 | <b>TREX1</b>     | NM_033628    | 14.7756  | 0.088291712 | <b>-0.591707449</b> | 8.18E-10  | 6.4445609 | 2.2E-03 | 1.2 | 4.3E-15  |
| 3751184 | <b>PHF12</b>     | NM_020889    | 10.44832 | 0.088186592 | <b>-0.531958779</b> | 6.83E-08  | 8.0420334 | 2.3E-07 | 1.4 | 3.7E-10  |
| 3180957 | LOC442497        | XM_499501    | 4.961913 | 0.087852969 | 0.634830808         | 1.83E-11  | 7.8661872 | 2.2E-06 | 1.4 | 3.7E-01  |
| 2883423 | MGC27121         | NM_001001343 | 4.088003 | 0.08785061  | 0.477912806         | 1.90E-06  | 6.3060278 | --      | --  | --       |
| 2325251 | <b>TCEB3</b>     | NM_003198    | 12.59195 | 0.086196409 | <b>-0.58525409</b>  | 1.38E-09  | 8.1154121 | --      | --  | --       |
| 3442024 | <b>NOL1</b>      | NM_006170    | 3.930591 | 0.0860667   | <b>-0.618978126</b> | 7.90E-11  | 7.4003856 | --      | --  | --       |
| 3948640 | <b>FBLN1</b>     | NM_006486    | 3.909337 | 0.085436258 | <b>-0.650292621</b> | 4.02E-12  | 7.88171   | 8.9E-04 | 1.5 | 2.8E-10  |
| 3875908 | PLCB4            | NM_000933    | 12.06465 | 0.084913347 | 0.582982435         | 1.65E-09  | 6.1725121 | 2.4E-21 | 3.3 | 1.1E-73  |
| 3334783 | ARL2             | NM_001667    | 5.924257 | 0.084751398 | 0.509360494         | 2.94E-07  | 8.1080827 | 2.5E-07 | 1.8 | 4.7E-40  |
| 3722554 | <b>DHX8</b>      | NM_004941    | 4.190049 | 0.084597798 | <b>-0.520108561</b> | 1.49E-07  | 7.9810484 | 2.9E-01 | 1.2 | 9.7E-04  |
| 2836242 | <b>GRIA1</b>     | NM_000827    | 3.839452 | 0.084279995 | <b>-0.536474511</b> | 5.04E-08  | 9.9357016 | 2.7E-13 | 3.5 | 2.1E-37  |
| 2358221 | <b>TARSL1</b>    | NM_025150    | 5.826992 | 0.083850503 | <b>-0.538134263</b> | 4.50E-08  | 8.4338507 | --      | --  | --       |
| 3971451 | <b>PHX</b>       | NM_000444    | 6.708026 | 0.08309787  | <b>-0.679121933</b> | 1.88E-13  | 5.1882697 | 3.2E-04 | 1.3 | 6.0E-07  |
| 3834089 | <b>HNRPUL1</b>   | NM_144732    | 3.469161 | 0.082877704 | <b>-0.454840395</b> | 6.68E-06  | 9.2319542 | --      | --  | --       |
| 2800503 | <b>POLS</b>      | NM_006999    | 8.607892 | 0.082690177 | <b>-0.606066647</b> | 2.46E-10  | 7.9806732 | --      | --  | --       |
| 3758967 | <b>UBTF</b>      | NM_014233    | 4.073647 | 0.082684492 | <b>-0.522245016</b> | 1.30E-07  | 8.7585548 | 1.0E-03 | 1.3 | 2.2E-01  |
| 2604998 | IQCA             | NM_024726    | 10.05487 | 0.081911175 | 0.557521247         | 1.14E-08  | 5.1263581 | 1.9E-24 | 1.9 | 6.1E-08  |

Y (KEGG)

Y (KEGG)

|         |                  |           |           |             |                     |           |           |         |     |          |
|---------|------------------|-----------|-----------|-------------|---------------------|-----------|-----------|---------|-----|----------|
| 2596386 | MDH1B            | NM_206892 | 10.5356   | 0.081847841 | 0.459693001         | 5.17E-06  | 4.4913255 | 2.5E-12 | 1.7 | 1.1E-02  |
| 3484393 | LGR8             | NM_130806 | 2.61907   | 0.081785259 | 0.225884026         | 0.0322966 | 2.9376043 | 2.3E-15 | 1.6 | 4.5E-12  |
| 3721926 | TUBG2            | NM_016437 | 4.93288   | 0.08118785  | 0.59016475          | 9.27E-10  | 8.0320496 | 5.3E-14 | 1.9 | 7.6E-10  |
| 2858134 | <b>PDE4D</b>     | NM_006203 | 24.3406   | 0.08112224  | <b>-0.581622746</b> | 1.84E-09  | 7.8208364 | 5.2E-10 | 1.7 | 6.2E-113 |
| 2324743 | <b>ZBTB40</b>    | NM_014870 | 6.976772  | 0.080553085 | <b>-0.620034838</b> | 7.19E-11  | 6.8740531 | 8.4E-02 | 1.3 | 1.3E-05  |
| 3811000 | RNF152           | NM_173557 | 6.793849  | 0.080421574 | 0.611765034         | 1.50E-10  | 8.7398136 | 8.4E-13 | 4.1 | 2.4E-02  |
| 3978579 | TRO              | NM_177555 | 5.14822   | 0.079796582 | 0.671138216         | 4.54E-13  | 7.9825847 | 6.1E-09 | 1.6 | 2.4E-05  |
| 3687405 | FAM57B           | NM_031478 | 4.441413  | 0.079794262 | 0.599876808         | 4.15E-10  | 8.4895643 | 1.5E-08 | 2.3 | 3.5E-01  |
| 3017354 | LHFPL3           | NM_199000 | 11.05182  | 0.079478926 | 0.650628816         | 3.89E-12  | 7.0833561 | --      | --  | --       |
| 2406139 | KIAA0319L        | NM_024874 | 4.79951   | 0.078219002 | 0.596152911         | 5.67E-10  | 7.4842004 | 8.1E-12 | 1.7 | 1.1E-11  |
| 3794056 | SDCCAG33         | NM_005786 | 7.475851  | 0.077922235 | 0.400980615         | 8.98E-05  | 6.8165807 | 3.1E-19 | 3.1 | 3.8E-34  |
| 3373724 | <b>SSRP1</b>     | NM_003146 | 4.96551   | 0.077913916 | <b>-0.606164466</b> | 2.44E-10  | 9.4416697 | --      | --  | --       |
| 3667281 | <b>SF3B3</b>     | NM_012426 | 3.185431  | 0.077437359 | <b>-0.551233428</b> | 1.80E-08  | 9.7299378 | 5.9E-04 | 1.3 | 5.6E-05  |
| 2465519 | <b>LOC342970</b> | XM_292810 | 8.079537  | 0.07663985  | <b>-0.65239931</b>  | 3.25E-12  | 7.1456037 | --      | --  | --       |
| 3414969 | SCN8A            | NM_014191 | 4.450626  | 0.076326905 | 0.58947596          | 9.80E-10  | 7.7790689 | 3.2E-04 | 1.3 | 2.2E-13  |
| 2942306 | <b>TBC1D7</b>    | NM_016495 | 15.92512  | 0.07569196  | <b>-0.611239508</b> | 1.57E-10  | 7.0010614 | --      | --  | --       |
| 2333429 | <b>JMJD2A</b>    | NM_014663 | 5.312583  | 0.075647017 | <b>-0.614675144</b> | 1.16E-10  | 8.1683428 | 1.4E-02 | 1.2 | 2.0E-03  |
| 3938244 | <b>PPIL2</b>     | NM_148175 | 4.69364   | 0.075494382 | <b>-0.568248929</b> | 5.16E-09  | 7.3157129 | 5.2E-02 | 1.1 | 1.7E-04  |
| 2491168 | LOC200383        | NM_145299 | 7.507502  | 0.075307922 | 0.519631099         | 1.54E-07  | 5.1069265 | 1.4E-18 | 1.9 | 3.0E-13  |
| 3648306 | SNN              | NM_003498 | 3.627764  | 0.073836617 | 0.689580088         | 5.66E-14  | 10.205589 | 3.5E-07 | 1.9 | 8.0E-07  |
| 3014411 | <b>TRRAP</b>     | NM_003496 | 3.321873  | 0.073577186 | <b>-0.636810925</b> | 1.51E-11  | 8.2557125 | --      | --  | --       |
| 3082963 | <b>KIAA0711</b>  | NM_014867 | 16.78103  | 0.072782457 | <b>-0.559364325</b> | 1.00E-08  | 7.8258724 | 1.4E-07 | 1.2 | 3.3E-01  |
| 3957445 | <b>PES1</b>      | NM_014303 | 2.837011  | 0.072393529 | <b>-0.536351272</b> | 5.08E-08  | 7.6830594 | 2.9E-04 | 1.3 | 2.4E-04  |
| 3833238 | LGALS14          | NM_020129 | 2.453941  | 0.07198103  | 0.572732166         | 3.67E-09  | 4.4016628 | --      | --  | --       |
| 3907111 | TOMM34           | NM_006809 | 8.718049  | 0.071288698 | 0.635013969         | 1.79E-11  | 6.9403231 | 1.6E-10 | 1.5 | 1.7E-07  |
| 2851511 | CDH9             | NM_016279 | 4.336009  | 0.071154133 | 0.46848003          | 3.21E-06  | 6.1782559 | 2.4E-21 | 5.6 | 2.7E-66  |
| 3377091 | MAP4K2           | NM_004579 | 8.741928  | 0.070908822 | 0.565676085         | 6.26E-09  | 6.3781912 | 4.0E-09 | 1.3 | 4.9E-04  |
| 2603987 | NGEF             | NM_019850 | 2.191573  | 0.070303359 | 0.140573507         | 0.1863252 | 7.4760664 | 5.2E-20 | 4.6 | 4.8E-36  |
| 3741528 | <b>TAX1BP3</b>   | NM_014604 | 4.764043  | 0.069822072 | <b>-0.652404154</b> | 3.25E-12  | 7.7286273 | 3.5E-05 | 1.3 | 2.2E-04  |
| 2491089 | LOC440870        | XM_496554 | 8.796016  | 0.069612907 | 0.489626196         | 9.70E-07  | 5.5711538 | 2.0E-19 | 2.3 | 4.3E-31  |
| 3978424 | RP1-112K5.2      | NM_058163 | 5.350828  | 0.069300997 | 0.641680133         | 9.44E-12  | 7.3084601 | 1.1E-07 | 1.3 | 3.6E-02  |
| 3032647 | PPP6             | NM_130797 | 4.948942  | 0.069242184 | 0.596089102         | 5.70E-10  | 8.3257492 | 1.1E-05 | 1.8 | 2.0E-20  |
| 2682436 | RYBP             | NM_012234 | 4.929277  | 0.068896297 | 0.43945128          | 1.47E-05  | 7.774856  | 2.8E-16 | 2.4 | 1.1E-02  |
| 2711818 | <b>FLJ11301</b>  | NM_018385 | 15.78561  | 0.067700152 | <b>-0.567056448</b> | 5.65E-09  | 6.8179265 | --      | --  | --       |
| 2477073 | <b>CRIM1</b>     | NM_016441 | 3.840454  | 0.067587975 | <b>-0.543773406</b> | 3.05E-08  | 8.4030682 | 1.2E-09 | 2.2 | 4.4E-08  |
| 3302805 | HPS1             | NM_000195 | 14.32799  | 0.067485016 | 0.569869404         | 4.57E-09  | 6.7798902 | 8.6E-15 | 1.4 | 9.8E-13  |
| 4024420 | LDOC1            | NM_012317 | 4.079559  | 0.06694247  | 0.557486225         | 1.15E-08  | 9.3401024 | 2.9E-06 | 1.6 | 1.0E-05  |
| 3304073 | KCNIP2           | NM_173191 | 4.151099  | 0.066649094 | 0.614020866         | 1.23E-10  | 7.1744935 | 5.3E-17 | 2.1 | 1.4E-71  |
| 3773426 | <b>NPTX1</b>     | NM_002522 | 7.944035  | 0.066485312 | <b>-0.610036367</b> | 1.74E-10  | 7.3024057 | 3.6E-16 | 2.9 | 1.0E+00  |
| 3100497 | <b>MGC34646</b>  | NM_173519 | 11.23577  | 0.066404333 | <b>-0.602920258</b> | 3.21E-10  | 9.1782377 | 4.6E-07 | 1.5 | 3.5E-05  |
| 3136271 | PENK             | NM_006211 | 2.214824  | 0.065339473 | 0.125225588         | 0.2395854 | 7.4482995 | --      | --  | --       |
| 3219030 | ---              | ---       | 8.675109  | 0.065105074 | <b>-0.643921222</b> | 7.58E-12  | 7.6112838 | 4.1E-07 | 1.7 | 4.9E-06  |
| 3888055 | ARFGEF2          | NM_006420 | 4.665522  | 0.064137859 | 0.550407702         | 1.91E-08  | 7.5746787 | 2.4E-04 | 1.2 | 7.9E-05  |
| 3955875 | <b>TFIP11</b>    | NM_012143 | 2.902964  | 0.063222791 | <b>-0.549637925</b> | 2.02E-08  | 7.2543944 | --      | --  | --       |
| 3209060 | <b>TRPM3</b>     | NM_206947 | 2.879081  | 0.062422294 | <b>-0.300807826</b> | 0.0039659 | 7.4116733 | 4.9E-09 | 2.5 | 2.0E-34  |
| 2358171 | <b>PRPF3</b>     | NM_004698 | 10.002373 | 0.061288661 | <b>-0.625972917</b> | 4.18E-11  | 8.0639288 | 5.6E-04 | 1.4 | 2.0E-04  |
| 3466499 | <b>USP44</b>     | NM_032147 | 3.172614  | 0.06097971  | <b>-0.569130461</b> | 4.83E-09  | 4.5343614 | 6.5E-05 | 1.3 | 1.0E+00  |
| 3957003 | <b>ASCC2</b>     | NM_032204 | 3.679348  | 0.060877241 | <b>-0.568176927</b> | 5.19E-09  | 7.4582218 | --      | --  | --       |
| 3839142 | <b>ZNF473</b>    | NM_015428 | 4.335564  | 0.059867588 | <b>-0.65199766</b>  | 3.39E-12  | 6.6937729 | 2.3E-02 | 1.3 | 6.0E-04  |
| 2560524 | TACR1            | NM_001058 | 1.922455  | 0.059588591 | 0.159763682         | 0.1325442 | 5.1702357 | 2.5E-24 | 2.3 | 9.6E-04  |
| 2384705 | <b>KIAA0133</b>  | NM_014777 | 4.296594  | 0.059493421 | <b>-0.665063364</b> | 8.73E-13  | 6.6263607 | --      | --  | --       |
| 3905073 | <b>KIAA0406</b>  | NM_014657 | 2.671073  | 0.058645765 | <b>-0.565565941</b> | 6.32E-09  | 7.5328989 | --      | --  | --       |
| 3609592 | MCTP2            | NM_018349 | 4.368247  | 0.057510238 | 0.368580153         | 0.0003509 | 5.3038459 | --      | --  | --       |
| 3947036 | MGC40042         | BC035720  | 2.140467  | 0.057280215 | 0.548781879         | 2.14E-08  | 4.5073846 | --      | --  | --       |
| 2710599 | <b>CLDN1</b>     | NM_021101 | 5.48059   | 0.056990571 | <b>-0.375712944</b> | 0.0002631 | 5.6009504 | 5.4E-06 | 1.9 | 1.0E+00  |
| 2829864 | LOC153328        | NM_145282 | 5.464961  | 0.056984319 | 0.672871971         | 3.76E-13  | 6.6692266 | 1.3E-21 | 1.6 | 1.6E-12  |
| 2796995 | <b>ARGBP2</b>    | NM_021069 | 5.289679  | 0.056721128 | <b>-0.592160241</b> | 7.88E-10  | 8.2230419 | 1.6E-03 | 1.4 | 1.4E-05  |
| 3760490 | WNT3             | NM_030753 | 2.983789  | 0.055356568 | 0.522241864         | 1.30E-07  | 6.4818683 | 1.0E-24 | 1.8 | 2.0E-02  |
| 2923928 | <b>FABP7</b>     | NM_001446 | 12.17831  | 0.055071602 | <b>-0.559252851</b> | 1.01E-08  | 13.053782 | 5.6E-07 | 1.4 | 3.3E-22  |
| 3958658 | <b>LARGE</b>     | NM_004737 | 2.037582  | 0.054738723 | <b>-0.547162837</b> | 2.40E-08  | 8.5267384 | 7.1E-11 | 2.3 | 3.3E-04  |
| 3336378 | <b>RBM14</b>     | NM_006328 | 2.166507  | 0.053947189 | <b>-0.549746001</b> | 2.00E-08  | 8.5242956 | 6.2E-04 | 1.4 | 4.9E-03  |
| 3191900 | <b>NUP214</b>    | NM_005085 | 2.171015  | 0.053930524 | <b>-0.432261838</b> | 2.10E-05  | 7.7739134 | 4.0E-01 | 1.2 | 9.2E-04  |
| 2653673 | KCNMB2           | NM_181361 | 2.620948  | 0.053499995 | 0.564676366         | 6.75E-09  | 5.5777887 | 5.7E-12 | 1.6 | 1.3E-17  |
| 2545549 | SLC5A6           | NM_021095 | 3.125474  | 0.05308693  | 0.603975739         | 2.94E-10  | 7.4853038 | 3.1E-10 | 1.5 | 2.3E-01  |
| 3882984 | MAP1LC3A         | NM_032514 | 3.265306  | 0.052509023 | 0.644899592         | 6.89E-12  | 7.1208016 | 1.2E-07 | 2.1 | 3.6E-13  |
| 3381063 | SKD3             | NM_030813 | 4.437883  | 0.052279868 | 0.551947142         | 1.71E-08  | 8.1852006 | 2.1E-05 | 1.3 | 6.0E-03  |
| 2900299 | <b>NZF192</b>    | NM_006298 | 3.522967  | 0.051730419 | <b>-0.612979907</b> | 1.35E-10  | 8.4385589 | --      | --  | --       |
| 3263624 | <b>MXI1</b>      | NM_005962 | 3.531072  | 0.051068708 | <b>-0.49513308</b>  | 7.01E-07  | 7.6154989 | 1.5E-06 | 1.7 | 2.6E-04  |
| 3653042 | MGC3248          | NM_032486 | 3.775015  | 0.05053611  | 0.505490878         | 3.74E-07  | 10.103967 | --      | --  | --       |
| 2558612 | TGFA             | NM_003236 | 2.566619  | 0.05053202  | 0.369295316         | 0.000341  | 6.0381443 | 2.1E-19 | 2.2 | 1.2E-31  |
| 2661992 | OXRTR            | NM_000916 | 2.435139  | 0.050337196 | 0.370549928         | 0.0003243 | 5.6622121 | --      | --  | --       |
| 2811145 | <b>PART1</b>     | NM_016590 | 4.397955  | 0.050221918 | <b>-0.476860242</b> | 2.02E-06  | 4.1376974 | 4.4E-04 | 1.7 | 1.0E+00  |
| 3346548 | BIRC3            | NM_182962 | 4.237705  | 0.049828507 | 0.644422224         | 7.22E-12  | 3.3846938 | 6.4E-14 | 1.3 | 1.0E+00  |
| 3507003 | LNX2             | NM_153371 | 4.495223  | 0.049118314 | 0.584357046         | 1.48E-09  | 7.473827  | 5.1E-15 | 1.7 | 2.0E-11  |
| 3854756 | RAB3A            | NM_002866 | 3.725822  | 0.048807305 | 0.483427961         | 1.39E-06  | 9.6982383 | 1.1E-06 | 1.7 | 9.3E-01  |
| 3570218 | <b>C14orf162</b> | NM_020181 | 5.750345  | 0.047638026 | <b>-0.633190811</b> | 2.13E-11  | 7.9026804 | --      | --  | --       |
| 2636695 | ZDHHC23          | NM_173570 | 4.30423   | 0.047255996 | 0.402594653         | 8.36E-05  | 6.7814308 | 2.8E-23 | 4.0 | 3.9E-01  |
| 2654091 | <b>USP13</b>     | NM_003940 | 9.458654  | 0.0470752   | <b>-0.497195297</b> | 6.20E-07  | 7.4205436 | 7.1E-02 | 1.2 | 4.1E-06  |
| 2382467 | <b>LOC440723</b> | XM_498832 | 5.83427   | 0.046215611 | <b>-0.464234676</b> | 4.05E-06  | 7.1386262 | 1.2E-08 | 2.6 | 1.3E-05  |
| 2901913 | <b>LOC387922</b> | XM_370723 | 7.57526   | 0.0460074   | <b>-0.532421022</b> | 6.62E-08  | 11.704229 | 7.5E-05 | 1.2 | 1.8E-04  |
| 3970166 | <b>CXorf15</b>   | NM_018360 | 4.35771   | 0.044235527 | <b>-0.623225282</b> | 5.38E-11  | 6.8522447 | --      | --  | --       |
| 2708817 | TMEM41A          | NM_080652 | 3.399313  | 0.044192508 | 0.599539221         | 4.27E-10  | 7.3650108 | 1.3E-11 | 1.6 | 3.1E-02  |
| 3838238 | LIN7B            | NM_022165 | 2.862141  | 0.044041116 | 0.599922537         | 4.14E-10  | 6.9780238 | 4.9E-10 | 1.6 | 9.6E-01  |
| 3251848 | <b>FUT11</b>     | NM_173540 | 1.592351  | 0.043321179 | <b>-0.441352142</b> | 1.34E-05  | 8.1662053 | --      | --  | --       |
| 3643297 | STUB1            | NM_005861 | 4.391946  | 0.042656109 | 0.480668764         | 1.63E-06  | 8.2152251 | 1.3E-06 | 1.4 | 2.3E-01  |

Y (GO BP)

Y (both)



|         |           |              |          |             |              |           |           |         |     |          |           |
|---------|-----------|--------------|----------|-------------|--------------|-----------|-----------|---------|-----|----------|-----------|
| 2669888 | GORASP1   | NM_031899    | 2.7938   | 0.042433768 | 0.555811903  | 1.30E-08  | 7.2639888 | 3.5E-05 | 1.3 | 2.7E-02  |           |
| 3475838 | FLJ12750  | NM_024667    | 2.383307 | 0.041922267 | -0.509539821 | 2.91E-07  | 8.069613  | 1.2E-04 | 1.6 | 5.9E-03  |           |
| 2325274 | C1orf128  | NM_020362    | 4.364242 | 0.041706127 | 0.601223677  | 3.71E-10  | 8.3814178 | 1.1E-06 | 1.7 | 3.5E-01  |           |
| 3120699 | LRRC14    | NM_014665    | 3.876783 | 0.041064634 | -0.583250314 | 1.62E-09  | 7.0252201 | 1.7E-02 | 1.2 | 1.2E-03  |           |
| 3205488 | ZBTB5     | NM_014872    | 4.969448 | 0.039783086 | -0.62170325  | 6.18E-11  | 7.066369  | --      | --  | --       |           |
| 3377789 | RELA      | NM_021975    | 2.190516 | 0.039229612 | -0.446066401 | 1.05E-05  | 7.8631038 | --      | --  | --       |           |
| 2716713 | STK32B    | NM_018401    | 3.894955 | 0.038495643 | -0.517686688 | 1.74E-07  | 7.9766679 | 1.0E-06 | 2.0 | 4.3E-17  |           |
| 3457455 | SMARCC2   | NM_139067    | 2.667779 | 0.038339777 | -0.253931141 | 0.0157328 | 9.517666  | 1.0E-02 | 1.3 | 2.0E-48  |           |
| 2565246 | FLJ20507  | NM_017849    | 2.585157 | 0.03773014  | 0.528950059  | 8.35E-08  | 8.880937  | 5.9E-05 | 1.5 | 1.5E-09  |           |
| 3759356 | EFTUD2    | NM_004247    | 1.272098 | 0.037200637 | -0.449748615 | 8.70E-06  | 8.8145464 | 1.4E-01 | 1.2 | 8.3E-15  |           |
| 2769346 | LNx       | NM_032622    | 16.0241  | 0.035716383 | -0.430549112 | 2.28E-05  | 7.7347362 | 2.7E-13 | 2.0 | 2.4E-25  |           |
| 2403446 | PTAFR     | NM_000952    | 3.272438 | 0.034855053 | 0.516618134  | 1.86E-07  | 5.6807048 | --      | --  | --       |           |
| 3229449 | C9orf116  | NM_144654    | 4.618822 | 0.034638382 | 0.602451673  | 3.34E-10  | 6.2611016 | 7.2E-18 | 1.7 | 5.4E-14  |           |
| 3128817 | ADRA1A    | NM_033302    | 2.029176 | 0.034275383 | 0.242752235  | 0.0211466 | 4.907498  | 2.4E-24 | 1.5 | 4.2E-34  |           |
| 3418303 | PIP5K2C   | NM_024779    | 1.681336 | 0.034257545 | 0.510080234  | 2.82E-07  | 7.2884782 | 1.4E-09 | 1.6 | 4.9E-01  |           |
| 4007734 | LOC441797 | XM_497552    | 5.234293 | 0.033684934 | 0.511875415  | 2.52E-07  | 6.9742444 | 1.8E-06 | 1.3 | 8.7E-05  |           |
| 2599500 | ZNF142    | NM_005081    | 3.63521  | 0.033184242 | -0.445686398 | 1.07E-05  | 7.1721862 | --      | --  | --       |           |
| 3189714 | GARNL3    | NM_032293    | 1.415517 | 0.03234006  | -0.133316794 | 0.210324  | 8.6925529 | 4.7E-13 | 2.1 | 4.8E-12  |           |
| 3587553 | GREM1     | NM_013372    | 3.938511 | 0.031583615 | -0.433901335 | 1.93E-05  | 6.0405611 | --      | --  | --       |           |
| 2919399 | FLJ16517  | NM_001004317 | 1.31472  | 0.031500599 | 0.605940549  | 2.48E-10  | 3.8961498 | 5.5E-15 | 1.7 | 1.0E+00  |           |
| 3597521 | APH1B     | NM_031301    | 1.948531 | 0.030876034 | -0.438466119 | 1.54E-05  | 6.7745582 | 1.9E-05 | 1.4 | 5.8E-01  |           |
| 2943236 | DTNBP1    | NM_183041    | 2.161302 | 0.029664317 | 0.39935977   | 9.65E-05  | 6.3803251 | 6.5E-16 | 2.2 | 2.8E-22  |           |
| 3790529 | GRP       | NM_001012512 | 10.13242 | 0.029500973 | -0.476211306 | 2.09E-06  | 7.1486887 | --      | --  | --       |           |
| 3762355 | PRO1855   | NM_018509    | 1.730021 | 0.029251336 | 0.519086292  | 1.59E-07  | 8.3294326 | 3.0E-05 | 1.2 | 3.1E-05  |           |
| 2319832 | APITD1    | NM_199294    | 0.905522 | 0.028715206 | 0.149964331  | 0.1583061 | 5.6779126 | 1.4E-19 | 1.3 | 2.3E-100 |           |
| 3868963 | ETFB      | NM_001985    | 7.017737 | 0.028332301 | 0.421316276  | 3.54E-05  | 7.6601434 | 1.2E-13 | 2.0 | 2.3E-18  |           |
| 2640379 | FLJ40083  | NM_182628    | 1.319966 | 0.026843393 | -0.436839018 | 1.67E-05  | 5.3601812 | 2.8E-09 | 1.4 | 2.2E-08  |           |
| 2864584 | DP58      | NM_001004441 | 0.810435 | 0.026813007 | 0.213769764  | 0.0430628 | 3.2320197 | --      | --  | --       |           |
| 3701779 | HSPC105   | NM_145168    | 1.159503 | 0.025537069 | 0.169713554  | 0.1097846 | 4.1702189 | 3.7E-20 | 1.7 | 1.0E+00  |           |
| 3708991 | EFNB3     | NM_001406    | 1.990305 | 0.025469872 | 0.498628689  | 5.68E-07  | 7.8710518 | 9.4E-05 | 1.5 | 5.1E-03  |           |
| 2761941 | FLJ90013  | NM_153365    | 12.91684 | 0.025072153 | -0.321087081 | 0.002031  | 7.9479394 | 7.6E-04 | 1.5 | 5.2E-04  |           |
| 3211579 | TLE1      | NM_005077    | 1.807131 | 0.024949204 | 0.344927196  | 0.0008706 | 8.0308244 | 6.9E-05 | 1.7 | 5.2E-67  | Y (GO BP) |
| 2412690 | KTI12     | NM_138417    | 3.054769 | 0.023656073 | -0.53849523  | 4.39E-08  | 7.2604185 | --      | --  | --       |           |
| 3687494 | MAPK3     | NM_002746    | 1.07954  | 0.021668606 | 0.393662387  | 0.0001237 | 8.8862269 | 3.0E-04 | 1.4 | 1.0E+00  |           |
| 3091797 | EXTL3     | NM_001440    | 2.055852 | 0.021642032 | -0.31986221  | 0.0021176 | 8.9698963 | 2.1E-03 | 1.6 | 1.7E-06  |           |
| 2538480 | TSSC1     | NM_003310    | 0.735579 | 0.020421064 | 0.066720652  | 0.5320914 | 7.7764835 | 7.4E-12 | 2.4 | 3.5E-41  |           |
| 3319613 | MGC10850  | AK125453     | 0.567792 | 0.01860044  | 0.132481147  | 0.2132226 | 6.542527  | --      | --  | --       |           |
| 3765059 | ABC1      | NM_022070    | 0.929551 | 0.017433125 | -0.433514018 | 1.97E-05  | 7.2482088 | --      | --  | --       |           |
| 3435980 | FLJ12975  | NM_024809    | 1.096243 | 0.016933483 | -0.2609211   | 0.0129952 | 7.0355465 | 3.3E-01 | 1.2 | 2.3E-05  |           |
| 2948564 | MDC1      | NM_014641    | 0.814943 | 0.014516524 | -0.497008839 | 6.27E-07  | 6.6299506 | --      | --  | --       |           |
| 3141589 | IL7       | NM_000880    | 0.607858 | 0.010292688 | -0.267581467 | 0.0107818 | 4.1202269 | --      | --  | --       |           |

Table S17. M15 (cyan): PFC module

NCTX ANOVA

| Transcript ID | Symbol    | Accession       | kTotal    | kWithin-Connectivity | eigencorr  | eigenpval | meanExpr  | DEX     | FoldChng | DAS      |
|---------------|-----------|-----------------|-----------|----------------------|------------|-----------|-----------|---------|----------|----------|
| 3450655       | CPNE8     | NM_153634       | 31.629026 | 1                    | 0.9323786  | 0         | 5.3409086 | 7.1E-15 | 4.9      | 3.8E-158 |
| 3812864       | CBLN2     | NM_182511       | 26.114141 | 0.888555054          | 0.9407788  | 0         | 8.1661686 | 9.9E-18 | 17.1     | 3.3E-232 |
| 3884405       | VSTM2L    | NM_080607       | 25.120495 | 0.875465531          | 0.9032152  | 0         | 8.68374   | 1.5E-18 | 6.0      | 3.5E-24  |
| 2955691       | RCAN2     | NM_005822       | 25.096987 | 0.827926833          | 0.9357529  | 0         | 7.3323198 | 2.2E-08 | 3.9      | 5.6E-13  |
| 3102372       | SULF1     | NM_015170       | 23.065766 | 0.808788916          | 0.9182029  | 0         | 5.5107349 | 1.2E-12 | 4.3      | 0.0E+00  |
| 3931495       | KCNJ6     | NM_002240       | 26.440631 | 0.808281976          | 0.9299536  | 0         | 6.5502813 | 2.2E-09 | 2.6      | 3.5E-10  |
| 3523318       | NALCN     | NM_052867       | 59.103033 | 0.766505882          | 0.863459   | 0         | 5.8595914 | 1.0E-04 | 2.2      | 0.0E+00  |
| 2952323       | MDGA1     | NM_153487       | 27.432387 | 0.662810179          | 0.886458   | 0         | 6.7957665 | 5.4E-07 | 2.3      | 1.7E-09  |
| 2447540       | GLT25D2   | NM_015101       | 46.318887 | 0.662097055          | 0.8386823  | 0         | 5.6755567 | 3.6E-05 | 2.2      | 8.8E-02  |
| 2811145       | PART1     | AK094518        | 20.255001 | 0.660670103          | 0.8531728  | 0         | 3.6862359 | 7.2E-15 | 3.3      | 3.8E-50  |
| 2987843       | SDK1      | NM_152744       | 18.404005 | 0.657567489          | 0.8719924  | 0         | 6.8850286 | 8.3E-18 | 3.8      | 5.9E-252 |
| 3046739       | AMPH      | NM_001635       | 26.76277  | 0.656222853          | 0.8741912  | 0         | 6.9617813 | 6.0E-09 | 2.2      | 2.2E-01  |
| 2790486       | DCHS2     | NM_017639       | 16.40466  | 0.651143634          | 0.8818201  | 0         | 3.714911  | 6.9E-13 | 1.9      | 1.6E-08  |
| 2800711       | ADCY2     | NM_020546       | 21.225172 | 0.640191007          | 0.8673819  | 0         | 7.1306335 | 3.5E-09 | 1.9      | 1.4E-04  |
| 3029900       | CNTNAP2   | NM_014141       | 17.548182 | 0.629219533          | 0.8434207  | 0         | 6.8726006 | 3.0E-11 | 7.3      | 0.0E+00  |
| 3626826       | MYO1E     | NM_004998       | 15.832933 | 0.603723564          | -0.8854155 | 5.78E-22  | 5.9535073 | 2.4E-09 | 2.2      | 4.0E-01  |
| 3614774       | OCA2      | NM_000275       | 23.481986 | 0.596671745          | -0.8008773 | 3.28E-15  | 5.752366  | 3.6E-17 | 3.1      | 2.0E-256 |
| 2975867       | MAP3K5    | NM_005923       | 18.026347 | 0.595382557          | 0.8793109  | 0         | 4.65655   | 2.3E-07 | 2.3      | 1.2E-177 |
| 2868904       | ST8SIA4   | ENST00000231461 | 45.821609 | 0.584134951          | 0.8597972  | 0         | 7.3832595 | 2.7E-04 | 2.4      | 8.4E-02  |
| 3007024       | WBSCR17   | NM_022479       | 16.05508  | 0.581526347          | 0.8650182  | 0         | 6.8361261 | 9.4E-10 | 2.7      | 8.5E-06  |
| 2444899       | TNR       | NM_003285       | 71.036241 | 0.574776663          | 0.7863448  | 2.22E-14  | 8.1624227 | 8.0E-03 | 2.5      | 1.0E+00  |
| 2382467       | CNIH3     | NM_152495       | 18.233602 | 0.567328637          | 0.840565   | 0         | 6.9656091 | 8.4E-14 | 3.7      | 1.0E+00  |
| 2447192       | RGS8      | NM_001102450    | 14.128658 | 0.56117801           | 0.8363934  | 0         | 5.0128362 | 4.0E-09 | 3.4      | 8.5E-85  |
| 3210497       | PRUNE2    | AB050197        | 18.428111 | 0.551589732          | 0.8611479  | 0         | 5.1833555 | 1.0E-06 | 1.9      | 2.0E-02  |
| 2939034       | SERPINB9  | NM_004155       | 15.652594 | 0.550047284          | 0.8605696  | 0         | 4.2400753 | 3.3E-09 | 1.9      | 1.0E+00  |
| 3153716       | ADCY8     | NM_001115       | 14.9863   | 0.549923506          | 0.8411121  | 0         | 5.4569703 | 1.4E-10 | 2.8      | 5.2E-85  |
| 3462567       | KCNC2     | NM_139136       | 40.458837 | 0.549358856          | 0.7997565  | 3.77E-15  | 6.8779373 | 2.3E-03 | 3.6      | 2.5E-03  |
| 3121751       | CSMD1     | NM_033225       | 34.92081  | 0.530774416          | 0.8140762  | 4.44E-16  | 7.0612586 | 6.3E-04 | 1.9      | 2.6E-02  |
| 2624385       | CACNA1D   | NM_000720       | 41.915978 | 0.526812697          | 0.8113028  | 8.88E-16  | 5.9363589 | 7.8E-04 | 1.6      | 0.0E+00  |
| 3305801       | SORCS1    | NM_052918       | 17.800292 | 0.523738753          | -0.8185426 | 2.54E-16  | 7.0214072 | 2.7E-15 | 3.7      | 0.0E+00  |
| 2749484       | RXFP1     | NM_021634       | 16.993989 | 0.522599024          | 0.8194347  | 2.22E-16  | 3.7238075 | 5.3E-07 | 4.3      | 6.8E-139 |
| 3789680       | ST8SIA3   | AF004668        | 48.569661 | 0.52199682           | 0.7529283  | 1.10E-12  | 5.4160886 | 4.4E-04 | 4.3      | 2.0E-01  |
| 3731543       | RGS9      | NM_003835       | 17.083222 | 0.518451734          | 0.7844061  | 2.84E-14  | 4.978969  | 3.3E-16 | 1.7      | 3.2E-210 |
| 2617188       | ITGA9     | NM_002207       | 14.086469 | 0.517872664          | 0.8226569  | 0         | 5.3419262 | 8.3E-14 | 2.0      | 3.8E-171 |
| 2808748       | PARP8     | NM_024615       | 83.359543 | 0.503416294          | 0.8163127  | 4.44E-16  | 6.9629463 | 9.1E-03 | 1.8      | 6.3E-03  |
| 3343452       | PRSS23    | NM_007173       | 15.54977  | 0.500357285          | 0.8411721  | 0         | 5.3181413 | 1.2E-10 | 2.2      | 4.2E-01  |
| 2724853       | NSUN7     | NM_024677       | 15.745026 | 0.491341379          | 0.7991726  | 4.00E-15  | 4.1465024 | 2.2E-13 | 1.8      | 1.0E+00  |
| 2643217       | TF        | NM_001063       | 13.421211 | 0.490457832          | 0.8443168  | 0         | 5.1781878 | 4.9E-05 | 1.5      | 1.1E-01  |
| 3491486       | PCDH17    | NM_001040429    | 12.472342 | 0.481197813          | 0.8209953  | 2.22E-16  | 7.8139586 | 7.1E-15 | 4.9      | 3.4E-32  |
| 2962820       | ME1       | NM_002395       | 19.559892 | 0.47799241           | 0.8457075  | 0         | 3.7570314 | 5.6E-07 | 1.8      | 8.5E-147 |
| 3497340       | HS6ST3    | NM_153456       | 18.026003 | 0.471532867          | 0.7739724  | 1.02E-13  | 6.7568853 | 8.1E-20 | 5.3      | 2.0E-10  |
| 3485740       | LOC400120 | NM_203451       | 15.78979  | 0.468653807          | 0.8275517  | 0         | 5.9986399 | ---     | ---      | ---      |
| 2750198       | NPY5R     | NM_006174       | 69.80096  | 0.464610827          | 0.8170021  | 4.44E-16  | 6.174393  | 8.5E-03 | 1.7      | 3.8E-05  |
| 2967276       | POPCD3    | NM_022361       | 16.298461 | 0.463212335          | 0.8088228  | 1.11E-15  | 3.5377587 | 2.6E-15 | 2.7      | 1.7E-36  |
| 3435980       | TCTN2     | NM_024809       | 16.200534 | 0.459400251          | 0.8332764  | 0         | 6.4425047 | 2.3E-10 | 2.1      | 2.6E-03  |
| 2523635       | CYP20A1   | NM_177538       | 31.665976 | 0.458155517          | 0.7644168  | 3.10E-13  | 5.4032205 | 1.4E-08 | 1.6      | 1.0E+00  |
| 2483451       | VRK2      | AY228370        | 12.505498 | 0.452277955          | -0.821954  | 1.50E-16  | 4.4486486 | 1.3E-06 | 1.8      | 1.3E-16  |
| 3762753       | CA10      | NM_001082533    | 15.20593  | 0.451218889          | 0.838813   | 0         | 5.5280763 | 2.0E-06 | 2.9      | 1.7E-31  |
| 3487600       | C13orf31  | BC035749        | 19.93755  | 0.449751615          | 0.842944   | 0         | 4.3152664 | 1.8E-04 | 1.8      | 7.0E-01  |
| 3959631       | EIF3D     | NM_003753       | 68.704203 | 0.449268497          | -0.7404325 | 4.05E-12  | 7.9925016 | ---     | ---      | ---      |
| 3192353       | NTNG2     | AY358165        | 24.395786 | 0.444040875          | -0.7365086 | 6.00E-12  | 6.6539691 | 1.1E-17 | 4.5      | 2.3E-81  |
| 3508898       | STARD13   | NM_178006       | 13.050946 | 0.443745623          | -0.8246906 | 9.78E-17  | 4.9943068 | 2.3E-08 | 1.7      | 4.5E-102 |
| 2601230       | SCG2      | NM_003469       | 47.217019 | 0.442997822          | 0.7476651  | 1.92E-12  | 6.382212  | ---     | ---      | ---      |
| 2918037       | KLHL32    | NM_052904       | 13.578157 | 0.429543856          | -0.7927038 | 9.83E-15  | 7.1117784 | 1.9E-13 | 3.8      | 6.6E-25  |
| 4053903       | WNT7B     | NM_058238       | 15.934958 | 0.426829723          | -0.8079088 | 1.22E-15  | 5.129233  | ---     | ---      | ---      |
| 3977299       | CLCN5     | NM_000084       | 13.050949 | 0.42543902           | 0.7767615  | 7.31E-14  | 3.8897567 | 3.8E-13 | 1.7      | 1.0E+00  |
| 3144033       | CALB1     | NM_004929       | 16.322287 | 0.423185042          | 0.7648662  | 2.94E-13  | 6.2858544 | 3.0E-06 | 5.6      | 1.4E-51  |
| 2794454       | GLRA3     | NM_006529       | 22.289886 | 0.415707602          | 0.8271891  | 0         | 3.7132876 | 7.6E-04 | 1.7      | 7.8E-01  |
| 2381309       | MOSC1     | NM_022746       | 18.810203 | 0.415003786          | 0.8204122  | 2.22E-16  | 6.2983494 | 6.6E-06 | 1.5      | 2.8E-02  |
| 3449068       | TMTC1     | NM_175861       | 15.290562 | 0.410569434          | -0.7625043 | 3.84E-13  | 6.5344641 | 2.4E-17 | 4.0      | 8.2E-54  |
| 2384788       | GALNT2    | BC041120        | 10.668284 | 0.398159299          | 0.8217218  | 0         | 7.7873784 | 4.5E-08 | 2.7      | 8.3E-01  |
| 3110395       | RIMS2     | NM_001100117    | 61.74109  | 0.397781654          | 0.7933466  | 8.88E-15  | 6.7727535 | 1.4E-02 | 1.8      | 1.0E+00  |
| 2766893       | APBB2     | NM_173075       | 32.071964 | 0.395804916          | 0.7717331  | 1.33E-13  | 8.565253  | 4.2E-02 | 1.5      | 1.0E+00  |
| 3467949       | SLC5A8    | NM_145913       | 13.956999 | 0.393655386          | 0.7760251  | 7.99E-14  | 4.4127051 | 4.4E-11 | 1.8      | 3.8E-199 |
| 3278198       | PHYH      | NM_006214       | 16.425515 | 0.393402943          | 0.8057753  | 1.78E-15  | 5.1976573 | 4.7E-08 | 2.2      | 1.4E-93  |
| 2624639       | CACNA2D3  | NM_018398       | 15.019566 | 0.390952522          | 0.7970521  | 5.55E-15  | 6.3789799 | 8.7E-06 | 2.2      | 9.8E-01  |
| 3802980       | DSC2      | NM_004949       | 19.074113 | 0.39072305           | 0.7898089  | 1.42E-14  | 4.4866182 | 4.8E-03 | 1.5      | 8.4E-43  |
| 2883440       | ADAM19    | NM_033274       | 27.621399 | 0.38762511           | 0.7726506  | 1.19E-13  | 6.0036016 | 1.1E-07 | 1.5      | 0.0E+00  |
| 3446137       | LMO3      | NM_018640       | 17.23233  | 0.386871486          | 0.7987318  | 4.44E-15  | 11.419605 | 1.4E-09 | 2.1      | 4.8E-11  |
| 2317686       | AJAP1     | NM_018836       | 45.669211 | 0.384873533          | 0.740862   | 3.88E-12  | 6.4403332 | 5.7E-04 | 2.2      | 1.5E-49  |

|         |          |              |           |             |            |          |           |         |     |          |
|---------|----------|--------------|-----------|-------------|------------|----------|-----------|---------|-----|----------|
| 2858134 | PDE4D    | NM_001104631 | 26.116156 | 0.384473707 | 0.7796334  | 5.15E-14 | 7.5351839 | 2.0E-04 | 1.4 | 4.0E-51  |
| 3892974 | COL9A3   | NM_001853    | 62.70485  | 0.382356893 | -0.8090734 | 1.03E-15 | 6.7851034 | 4.0E-09 | 2.3 | 6.2E-160 |
| 3062193 | SLC25A13 | NM_014251    | 26.315581 | 0.379819606 | 0.7263313  | 1.61E-11 | 5.213279  | 1.9E-05 | 1.7 | 3.8E-01  |
| 3968512 | CLCN4    | NM_001830    | 24.26337  | 0.377450078 | 0.8045161  | 2.00E-15 | 8.7164819 | 2.4E-04 | 1.8 | 4.7E-01  |
| 2918982 | GRIK2    | NM_175768    | 30.072044 | 0.370033266 | 0.7738072  | 1.04E-13 | 8.1219886 | 1.0E-05 | 2.8 | 1.4E-01  |
| 3672368 | KIAA0182 | NM_014615    | 51.985664 | 0.366541016 | -0.7941513 | 8.12E-15 | 7.7020157 | 1.1E-04 | 1.7 | 2.4E-10  |
| 3188697 | NEK6     | BC000101     | 17.379309 | 0.364824133 | -0.7458235 | 2.33E-12 | 7.2154289 | 5.9E-11 | 2.5 | 1.8E-12  |
| 3129731 | DUSP4    | NM_057158    | 11.304633 | 0.363988983 | 0.7700871  | 1.61E-13 | 5.948183  | 1.4E-11 | 2.7 | 2.6E-02  |
| 3308397 | HSPA12A  | NM_025015    | 18.84005  | 0.36050691  | 0.672797   | 1.54E-09 | 8.0841813 | 1.1E-17 | 2.6 | 1.7E-03  |
| 3329983 | PTPRJ    | NM_002843    | 33.141856 | 0.359935026 | 0.741769   | 3.53E-12 | 6.7953484 | 2.9E-03 | 1.5 | 1.0E+00  |
| 2685776 | MINA     | NM_001042533 | 23.287252 | 0.353980791 | 0.7595953  | 5.32E-13 | 4.9096684 | 5.9E-03 | 2.1 | 3.0E-01  |
| 2644565 | MRAS     | NM_012219    | 36.968013 | 0.353884174 | 0.7527752  | 1.12E-12 | 8.3273696 | 1.4E-03 | 1.8 | 1.0E+00  |
| 3086774 | C8orf79  | BC035082     | 15.464864 | 0.349567553 | 0.6851178  | 5.89E-10 | 7.161224  | 1.1E-09 | 2.4 | 1.8E-01  |
| 3091797 | EXTL3    | NM_001440    | 15.953844 | 0.347945981 | 0.7588545  | 5.77E-13 | 8.8837303 | 1.9E-04 | 1.8 | 1.0E+00  |
| 3803290 | FAM59A   | NM_022751    | 10.517825 | 0.343680344 | 0.7738158  | 1.04E-13 | 8.9213541 | 8.3E-08 | 1.8 | 1.0E+00  |
| 3385509 | FZD4     | NM_012193    | 12.008993 | 0.342673214 | 0.756545   | 7.44E-13 | 6.4402126 | 7.4E-13 | 2.2 | 8.0E-04  |
| 3464417 | MGAT4C   | NM_013244    | 50.909217 | 0.337644843 | 0.7663719  | 2.48E-13 | 8.1801037 | 4.1E-04 | 2.8 | 4.3E-06  |
| 3779207 | GNAL     | NM_182978    | 10.970255 | 0.336023169 | 0.8105354  | 8.88E-16 | 8.8331101 | 8.2E-06 | 2.2 | 7.2E-03  |
| 2343418 | PTGFR    | NM_001039585 | 8.4145995 | 0.334941058 | 0.7522476  | 1.18E-12 | 4.0682846 | 9.9E-09 | 1.7 | 1.0E+00  |
| 2939298 | C6orf85  | NM_021945    | 36.717076 | 0.333469762 | -0.7307268 | 1.06E-11 | 7.7896444 | ---     | --- | ---      |
| 3319073 | SYT9     | NM_175733    | 12.198931 | 0.329927303 | 0.7250929  | 1.82E-11 | 5.1555535 | 3.7E-13 | 2.7 | 3.5E-140 |
| 3016262 | EMID2    | NM_133457    | 15.867455 | 0.326229553 | 0.7669621  | 2.32E-13 | 7.2819665 | 3.6E-07 | 1.9 | 4.9E-11  |
| 3999395 | MID1     | NM_000381    | 19.456269 | 0.320332636 | -0.7661319 | 2.55E-13 | 7.024477  | 5.6E-08 | 2.7 | 1.0E+00  |
| 2323899 | UBXD3    | NM_152376    | 10.067352 | 0.319753995 | 0.7981843  | 4.88E-15 | 4.6059133 | 2.6E-10 | 1.9 | 4.1E-09  |
| 3155489 | FAM135B  | NM_015912    | 21.984374 | 0.316711674 | 0.7688911  | 1.86E-13 | 5.9652622 | 8.1E-06 | 1.5 | 1.7E-04  |
| 2956217 | C6orf138 | NM_001013732 | 12.999219 | 0.311906173 | 0.7836233  | 3.15E-14 | 5.4631001 | ---     | --- | ---      |
| 2448710 | FAM5C    | NM_199051    | 9.5739173 | 0.311111862 | 0.7719863  | 1.29E-13 | 6.313566  | 4.9E-07 | 4.4 | 1.5E-02  |
| 3908358 | SULF2    | NM_018837    | 8.6018818 | 0.308308131 | 0.7565393  | 7.44E-13 | 7.255511  | 2.9E-11 | 2.8 | 2.0E-164 |
| 3086809 | C8orf79  | NM_001099677 | 17.870345 | 0.304614375 | 0.6909056  | 3.68E-10 | 6.1636005 | 6.7E-09 | 2.6 | 2.8E-03  |
| 2608309 | LRRN1    | NM_020873    | 33.132141 | 0.303681288 | 0.7686269  | 1.91E-13 | 8.9011855 | 9.1E-03 | 1.9 | 1.0E+00  |
| 3211579 | TLE1     | NM_005077    | 12.548693 | 0.302977043 | -0.7490081 | 1.67E-12 | 7.3045608 | 8.1E-11 | 2.5 | 9.3E-07  |
| 2703836 | SLITRK3  | NM_014926    | 22.905093 | 0.301046682 | 0.6725228  | 1.58E-09 | 6.3544889 | 1.9E-03 | 2.6 | 1.4E-70  |
| 2748061 | TRIM2    | NM_015271    | 78.303502 | 0.299277238 | 0.728533   | 1.31E-11 | 10.18351  | ---     | --- | ---      |
| 2368590 | PAPPA2   | NM_020318    | 9.3333121 | 0.298991356 | -0.7668373 | 2.35E-13 | 5.7065597 | 4.4E-07 | 2.1 | 1.1E-81  |
| 3013178 | CASD1    | NM_022900    | 81.106799 | 0.298433566 | 0.750482   | 1.43E-12 | 8.5879173 | ---     | --- | ---      |
| 3959643 | ---      | ---          | 20.111833 | 0.298309212 | -0.745553  | 2.40E-12 | 9.4860489 | ---     | --- | ---      |
| 2479433 | PLEKHH2  | NM_172069    | 9.5322797 | 0.294129338 | -0.7385236 | 4.91E-12 | 4.1618154 | 2.3E-08 | 2.1 | 0.0E+00  |
| 2876897 | SPOCK1   | NM_004598    | 57.423101 | 0.292680791 | 0.6486055  | 9.02E-09 | 8.3874492 | 6.4E-03 | 2.3 | 1.0E+00  |
| 2667597 | GADL1    | NM_207359    | 10.476583 | 0.291343994 | 0.7224516  | 2.33E-11 | 3.6808349 | 2.2E-13 | 1.8 | 4.3E-34  |
| 3362159 | NRIP3    | NM_020645    | 14.876384 | 0.287684794 | 0.6986626  | 1.93E-10 | 5.5965065 | 3.0E-03 | 2.1 | 9.9E-02  |
| 2966496 | MCHR2    | NM_001040179 | 35.290986 | 0.286407252 | 0.7170773  | 3.82E-11 | 5.0334778 | 2.0E-06 | 3.6 | 2.4E-63  |
| 3517793 | KLF12    | NM_007249    | 20.64113  | 0.285092815 | 0.7139042  | 5.10E-11 | 8.1718869 | 7.8E-04 | 1.9 | 1.0E+00  |
| 2838416 | GABRA1   | NM_000806    | 37.74359  | 0.281611599 | 0.6998656  | 1.74E-10 | 6.4541967 | 4.2E-04 | 2.8 | 1.3E-23  |
| 3690747 | CBLN1    | NM_004352    | 9.8268577 | 0.280866511 | 0.733162   | 8.35E-12 | 5.8996468 | 2.3E-13 | 3.0 | 1.8E-17  |
| 3649052 | MKL2     | NM_014048    | 56.590456 | 0.27896585  | 0.6511205  | 7.56E-09 | 7.3550379 | 4.9E-02 | 1.7 | 3.0E-04  |
| 2743800 | PCDH10   | NM_032961    | 7.61782   | 0.278568221 | 0.7437368  | 2.89E-12 | 9.4320744 | 7.2E-07 | 3.0 | 3.2E-02  |
| 2993124 | NPY      | NM_000905    | 16.116046 | 0.276188507 | -0.6597142 | 4.09E-09 | 7.1936094 | 3.4E-12 | 4.1 | 5.5E-40  |
| 2488596 | EMX1     | NM_004097    | 56.983904 | 0.27487346  | -0.6977572 | 2.08E-10 | 6.9719927 | ---     | --- | ---      |
| 2683763 | ROBO1    | NM_133631    | 9.7120316 | 0.27059528  | 0.7435094  | 2.96E-12 | 10.052699 | 4.0E-12 | 3.2 | 3.2E-67  |
| 3018605 | SLC26A4  | NM_000441    | 13.618041 | 0.270316711 | -0.6808637 | 8.26E-10 | 6.0629237 | 6.2E-08 | 2.6 | 8.5E-08  |
| 2426734 | C1orf62  | NM_152763    | 9.8303466 | 0.269873667 | 0.6948073  | 2.67E-10 | 3.8236654 | 7.3E-07 | 2.2 | 1.9E-01  |
| 3807595 | MYO5B    | NM_001080467 | 10.002242 | 0.269823692 | -0.6830143 | 6.96E-10 | 6.4423151 | 7.7E-08 | 3.3 | 2.0E-142 |
| 3589458 | THBS1    | NM_003246    | 8.5696225 | 0.269030574 | -0.7148291 | 4.69E-11 | 9.120353  | 1.4E-07 | 4.8 | 1.4E-10  |
| 2895792 | RNF182   | NM_152737    | 9.7741331 | 0.26590154  | -0.7265259 | 1.58E-11 | 8.9625552 | 7.3E-07 | 3.3 | 1.0E+00  |
| 2841802 | HMP19    | NM_015980    | 10.627005 | 0.264365638 | 0.7337561  | 7.88E-12 | 11.249933 | 2.9E-04 | 1.9 | 1.0E+00  |
| 3079576 | SMARCD3  | NM_001003802 | 40.957055 | 0.262928803 | -0.6836825 | 6.60E-10 | 8.9442992 | 1.4E-03 | 1.8 | 1.0E+00  |
| 2779897 | MANBA    | NM_005908    | 38.34156  | 0.262513007 | 0.6481971  | 9.28E-09 | 5.1768448 | 1.4E-03 | 1.5 | 1.0E+00  |
| 3389976 | SLC35F2  | NM_017515    | 12.612466 | 0.257289208 | 0.6537081  | 6.30E-09 | 7.6268773 | 1.4E-09 | 2.3 | 3.7E-02  |
| 3067478 | NRCAM    | NM_001037132 | 59.20004  | 0.257055095 | 0.7068851  | 9.51E-11 | 8.5906294 | 5.7E-03 | 1.8 | 1.0E+00  |
| 3748449 | CCDC144A | NM_014695    | 16.449275 | 0.25585757  | 0.7215746  | 2.53E-11 | 7.9256026 | 3.5E-01 | 3.9 | 2.3E-94  |
| 2736060 | GRID2    | NM_001510    | 16.536406 | 0.254810823 | 0.7444108  | 2.70E-12 | 6.9091575 | 4.1E-07 | 2.6 | 8.2E-04  |
| 3962678 | PACSIN2  | NM_007229    | 8.961848  | 0.253966341 | 0.7249893  | 1.83E-11 | 6.4157541 | 6.1E-08 | 1.6 | 5.2E-01  |
| 2417362 | DIRAS3   | NM_004675    | 14.585278 | 0.25394385  | 0.7434612  | 2.97E-12 | 5.3396551 | 1.3E-03 | 2.1 | 1.0E+00  |
| 2404418 | FABP3    | NM_004102    | 70.413959 | 0.253486706 | 0.6246916  | 4.46E-08 | 9.4770811 | 3.0E-04 | 2.4 | 1.0E+00  |
| 2461935 | GNG4     | NM_001098722 | 8.2422369 | 0.251172555 | 0.7511626  | 1.33E-12 | 8.4684157 | 3.7E-07 | 2.9 | 8.3E-05  |
| 3737242 | SLC26A11 | NM_173626    | 11.357149 | 0.249250463 | 0.7026837  | 1.37E-10 | 6.204207  | 3.5E-12 | 1.8 | 1.0E+00  |
| 2567167 | LONRF2   | NM_198461    | 57.051632 | 0.248638389 | 0.6714025  | 1.72E-09 | 9.2345048 | ---     | --- | ---      |
| 3442854 | SLC2A3   | NM_006931    | 28.62189  | 0.248511279 | 0.7049443  | 1.13E-10 | 7.3834219 | 2.8E-02 | 1.6 | 1.5E-02  |
| 3188656 | LHX2     | NM_004789    | 11.350206 | 0.248308448 | -0.7454492 | 2.42E-12 | 9.5631942 | 7.0E-09 | 3.0 | 4.4E-02  |
| 3930235 | RCAN1    | NM_004414    | 11.27173  | 0.247695573 | 0.6408133  | 1.54E-08 | 7.5775489 | 3.0E-10 | 2.2 | 1.0E-09  |
| 2463173 | GREM2    | NM_022469    | 8.4419218 | 0.247008843 | 0.736715   | 5.88E-12 | 7.4655811 | 2.5E-06 | 3.4 | 1.0E+00  |
| 2727587 | KIT      | NM_000222    | 23.802609 | 0.244725793 | 0.7043245  | 1.19E-10 | 8.4015658 | 1.0E-04 | 1.9 | 4.4E-01  |
| 3449008 | OVCH1    | NM_183378    | 10.957641 | 0.242461027 | -0.6875706 | 4.83E-10 | 3.6294098 | 7.9E-11 | 1.5 | 1.0E+00  |
| 3497586 | MBNL2    | NM_144778    | 92.13708  | 0.241654546 | 0.6207854  | 5.71E-08 | 7.8265111 | ---     | --- | ---      |
| 2742109 | FGF2     | NM_002006    | 15.16648  | 0.241576284 | 0.7462787  | 2.22E-12 | 5.1089954 | 1.0E-03 | 1.9 | 4.0E-01  |

|         |            |              |           |             |                   |          |           |         |     |          |
|---------|------------|--------------|-----------|-------------|-------------------|----------|-----------|---------|-----|----------|
| 2791894 | FSTL5      | NM_020116    | 18.848353 | 0.238175495 | 0.7043249         | 1.19E-10 | 6.1466303 | ---     | --- | ---      |
| 3959644 |            | ---          | 24.389753 | 0.237532081 | <b>-0.6702409</b> | 1.87E-09 | 10.146614 | ---     | --- | ---      |
| 2598828 | IGFBP5     | NM_000599    | 7.0492568 | 0.236065289 | 0.7045199         | 1.17E-10 | 6.0918306 | 5.4E-12 | 4.8 | 2.4E-161 |
| 3906390 | PTPRT      | NM_133170    | 41.504655 | 0.23415867  | 0.6032742         | 1.67E-07 | 7.2462705 | 2.3E-04 | 3.1 | 2.3E-05  |
| 3797032 | EPB41L3    | NM_012307    | 17.152189 | 0.23047288  | <b>-0.7342121</b> | 7.53E-12 | 7.1416903 | ---     | --- | ---      |
| 3246888 | PRKG1      | NM_001098512 | 18.510093 | 0.229205356 | 0.692257          | 3.30E-10 | 4.6361889 | 1.8E-05 | 1.8 | 4.2E-01  |
| 2368840 | FAM5B      | NM_021165    | 7.2539975 | 0.226819958 | 0.7282619         | 1.34E-11 | 6.7238111 | 6.6E-07 | 2.2 | 5.5E-02  |
| 3959638 |            | ---          | 26.654766 | 0.2252478   | <b>-0.6375047</b> | 1.93E-08 | 9.0077923 | ---     | --- | ---      |
| 3947952 | PNPLA3     | NM_025225    | 28.892999 | 0.225028416 | 0.6939775         | 2.86E-10 | 6.8691047 | 1.8E-04 | 1.9 | 8.5E-01  |
| 7385641 | CLSTN2     | NM_022131    | 9.204743  | 0.222026277 | 0.6389488         | 1.75E-08 | 7.2283406 | 3.8E-13 | 2.4 | 2.0E-05  |
| 2738378 | NPNT       | NM_001033047 | 31.183941 | 0.219659295 | 0.6640068         | 2.99E-09 | 6.8882166 | 1.0E-05 | 5.3 | 3.1E-184 |
| 2389247 | KIF26B     | NM_018012    | 10.663121 | 0.218947172 | <b>-0.7208771</b> | 2.70E-11 | 5.2678718 | ---     | --- | ---      |
| 3070873 | GPR37      | NM_005302    | 14.100845 | 0.218944449 | 0.7270321         | 1.51E-11 | 7.1962975 | 8.6E-05 | 2.1 | 1.0E+00  |
| 2793137 | SH3RF1     | BC053671     | 6.196155  | 0.21151081  | 0.710902          | 6.67E-11 | 6.4467373 | 8.6E-04 | 1.7 | 9.6E-01  |
| 3385834 | GRM5       | NM_000842    | 54.381572 | 0.210527653 | 0.6009167         | 1.92E-07 | 8.8004197 | 4.1E-01 | 1.8 | 1.3E-02  |
| 3625539 | NEDD4      | NM_006154    | 19.767008 | 0.210396939 | <b>-0.696373</b>  | 2.34E-10 | 3.4803366 | 1.5E-03 | 1.2 | 2.3E-01  |
| 2740896 | NDST3      | NM_004784    | 6.9638567 | 0.208925857 | 0.7005039         | 1.65E-10 | 5.6766692 | 8.3E-05 | 2.4 | 7.2E-129 |
| 2342904 | ST6GALNAC5 | NM_030965    | 6.5116965 | 0.20382354  | 0.7473836         | 1.98E-12 | 7.3955524 | 2.2E-06 | 2.3 | 1.0E+00  |
| 2604390 | ARL4C      | NM_005737    | 14.327486 | 0.20202233  | 0.7204481         | 2.80E-11 | 8.8319548 | ---     | --- | ---      |
| 2898371 | NRSN1      | NM_080723    | 10.463393 | 0.200828948 | 0.7326319         | 8.79E-12 | 8.4141405 | 5.4E-03 | 2.0 | 1.0E+00  |
| 2930418 | UST        | NM_005715    | 41.932981 | 0.193460965 | 0.6618715         | 3.50E-09 | 7.5115906 | ---     | --- | ---      |
| 2820394 | NR2F1      | NM_005654    | 24.468628 | 0.193400207 | <b>-0.5467222</b> | 3.56E-06 | 8.9082706 | 6.9E-13 | 4.8 | 5.5E-02  |
| 3367231 | BDNF       | EF689020     | 5.4698567 | 0.193109674 | 0.7422428         | 3.37E-12 | 3.6589046 | 3.5E-08 | 2.1 | 1.0E+00  |
| 3809826 | ATP8B1     | NM_005603    | 9.2972679 | 0.192250059 | 0.7110272         | 6.60E-11 | 3.8368894 | 6.9E-06 | 1.7 | 1.0E+00  |
| 3240452 | BAMBI      | NM_012342    | 7.9530307 | 0.191967955 | 0.7112273         | 6.48E-11 | 4.9232405 | 2.7E-05 | 1.5 | 6.3E-01  |
| 3748432 |            | ---          | 6.0402739 | 0.191106128 | 0.6493194         | 8.58E-09 | 6.0860305 | 4.7E-07 | 3.0 | 1.5E-01  |
| 2984655 | RPS6KA2    | NM_021135    | 11.063413 | 0.188633489 | 0.6743309         | 1.37E-09 | 7.7327392 | 5.9E-08 | 2.0 | 1.0E+00  |
| 2899372 | BTN3A1     | NM_007048    | 9.1255433 | 0.186340698 | 0.6433556         | 1.30E-08 | 6.491274  | 6.0E-10 | 2.2 | 1.1E-05  |
| 3876245 | SNAP25     | NM_003081    | 5.9491654 | 0.18633595  | 0.7376124         | 5.38E-12 | 8.7364108 | 1.2E-05 | 2.0 | 1.0E+00  |
| 2728189 | PAICS      | NM_001079525 | 29.509859 | 0.182263609 | <b>-0.6738052</b> | 1.43E-09 | 6.5704963 | ---     | --- | ---      |
| 2574646 | BIN1       | NM_139343    | 27.623218 | 0.181430643 | 0.5991984         | 2.12E-07 | 8.19218   | 1.5E-02 | 1.7 | 1.0E+00  |
| 2967249 | BVES       | NM_147147    | 5.185272  | 0.178598076 | 0.7106905         | 6.80E-11 | 3.7084278 | ---     | --- | ---      |
| 2827525 | SLC12A2    | NM_001046    | 66.912135 | 0.178524673 | 0.6403715         | 1.59E-08 | 7.2289281 | ---     | --- | ---      |
| 3868963 | ETFB       | NM_001985    | 15.561632 | 0.176548093 | <b>-0.7083407</b> | 8.37E-11 | 6.7059237 | 3.0E-09 | 2.1 | 1.0E+00  |
| 2748723 | NPY2R      | NM_000910    | 4.8888763 | 0.175676673 | 0.6652705         | 2.72E-09 | 3.4556371 | ---     | --- | ---      |
| 2877597 | LRRTM2     | NM_015564    | 8.8993722 | 0.175619836 | 0.7126675         | 5.70E-11 | 8.8381497 | ---     | --- | ---      |
| 2766122 | FLJ13197   | AK023259     | 8.2608706 | 0.171070272 | <b>-0.6252521</b> | 4.30E-08 | 6.1823011 | 7.0E-05 | 1.9 | 5.4E-04  |
| 2863885 | LHFPL2     | NM_005779    | 5.6908837 | 0.170398233 | 0.7063781         | 9.95E-11 | 6.5227716 | 1.6E-08 | 2.4 | 1.0E+00  |
| 3213847 | SHC3       | NM_016848    | 7.4294604 | 0.167422704 | 0.6062338         | 1.40E-07 | 8.3300345 | 1.8E-13 | 3.0 | 8.8E-28  |
| 2805078 | CDH6       | NM_004932    | 12.26129  | 0.167019578 | 0.6555013         | 5.54E-09 | 7.5472641 | 1.9E-11 | 3.5 | 1.0E-19  |
| 3163982 | ADAMTSL1   | NM_001040272 | 6.7277259 | 0.163597154 | 0.5756019         | 8.01E-07 | 4.8988672 | 2.3E-10 | 2.1 | 7.5E-56  |
| 3959656 |            | ---          | 22.490448 | 0.162389186 | <b>-0.6390148</b> | 1.74E-08 | 8.3800402 | ---     | --- | ---      |
| 2418078 | NEGR1      | NM_173808    | 13.294091 | 0.158316921 | 0.6389232         | 1.75E-08 | 8.4605743 | 8.6E-04 | 2.7 | 8.5E-02  |
| 2788366 | LOC152485  | NM_178835    | 6.2074095 | 0.156079117 | 0.6293709         | 3.30E-08 | 7.3672279 | 7.0E-09 | 1.9 | 3.8E-109 |
| 3406179 | H2AFJ      | NM_177925    | 16.873597 | 0.151409297 | <b>-0.6552167</b> | 5.66E-09 | 4.8813411 | ---     | --- | ---      |
| 2632778 | EPHA6      | NM_001080448 | 5.3712751 | 0.149892117 | <b>-0.5704952</b> | 1.05E-06 | 9.0702655 | 6.9E-13 | 5.5 | 2.5E-05  |
| 3164086 | ADAMTSL1   | NM_001040272 | 4.9041385 | 0.14668965  | 0.6015942         | 1.84E-07 | 5.3510318 | 3.0E-10 | 2.1 | 5.6E-11  |
| 3210616 | PRUNE2     | NM_138818    | 4.66249   | 0.145644672 | 0.6828973         | 7.03E-10 | 2.8097879 | ---     | --- | ---      |
| 3200762 | SLC24A2    | NM_020344    | 4.6765306 | 0.144449354 | <b>-0.6469522</b> | 1.01E-08 | 7.2572189 | 2.1E-04 | 1.6 | 2.0E-01  |
| 3219030 |            | ---          | 9.5260296 | 0.143576087 | <b>-0.6683817</b> | 2.16E-09 | 7.2913452 | 6.0E-05 | 2.0 | 1.0E+00  |
| 3966929 | GYG2       | NM_003918    | 4.9726666 | 0.140833496 | 0.6191575         | 6.33E-08 | 4.9868389 | 2.8E-08 | 1.8 | 4.8E-57  |
| 2762088 | LDB2       | AF064493     | 13.191991 | 0.139735614 | 0.6405554         | 1.57E-08 | 9.012946  | 1.6E-02 | 1.9 | 5.2E-01  |
| 2452571 | ELK4       | NM_001973    | 5.0098776 | 0.136870235 | <b>-0.6579488</b> | 4.65E-09 | 6.8649797 | 3.3E-02 | 1.6 | 1.0E+00  |
| 3020302 | CAV1       | NM_001753    | 3.5836743 | 0.132071145 | 0.6917005         | 3.45E-10 | 5.22295   | 3.4E-04 | 1.6 | 7.3E-01  |
| 4001556 | PHKA2      | BC014036     | 4.2145891 | 0.129565459 | <b>-0.6375651</b> | 1.92E-08 | 7.0845906 | 1.0E-02 | 1.3 | 3.0E-02  |
| 3339971 | PLEKHB1    | AF100612     | 4.3257461 | 0.125521071 | 0.6312261         | 2.92E-08 | 5.3054338 | 1.9E-05 | 1.6 | 1.0E+00  |
| 3512719 | LOC283514  | NM_198849    | 7.447665  | 0.123532824 | 0.6712144         | 1.74E-09 | 7.9855197 | ---     | --- | ---      |
| 3183348 | TAL2       | NM_005421    | 7.623987  | 0.122041617 | 0.7004431         | 1.66E-10 | 4.6797014 | ---     | --- | ---      |
| 3873824 | TMC2       | NM_080751    | 4.8806671 | 0.120782827 | 0.6917315         | 3.44E-10 | 4.6592776 | 4.2E-07 | 1.8 | 1.0E+00  |
| 2320392 | C1orf187   | BC111064     | 24.217801 | 0.112234309 | 0.5421155         | 4.45E-06 | 8.89387   | ---     | --- | ---      |
| 2632832 | EPHA6      | NM_001080448 | 5.9307678 | 0.112161853 | <b>-0.4811541</b> | 6.56E-05 | 6.3110471 | 6.0E-13 | 4.0 | 8.1E-02  |
| 3536396 | CGRRF1     | NM_006568    | 7.7223936 | 0.109550628 | 0.6670653         | 2.38E-09 | 3.9112824 | 6.5E-03 | 1.6 | 3.8E-01  |
| 2442008 | RXRG       | NM_006917    | 4.8475314 | 0.108707028 | 0.6182839         | 6.68E-08 | 4.1781218 | 3.5E-14 | 4.6 | 1.0E+00  |
| 2915571 | C6orf117   | NM_138409    | 4.1450728 | 0.104748433 | <b>-0.6293814</b> | 3.29E-08 | 5.3217257 | 3.0E-05 | 1.5 | 1.0E+00  |
| 3486728 | SLC25A15   | NM_014252    | 17.581538 | 0.10308979  | 0.6473779         | 9.83E-09 | 6.595586  | 4.1E-03 | 1.6 | 7.8E-01  |
| 2924330 | TPD52L1    | NM_001003395 | 3.2041262 | 0.096353309 | 0.6366945         | 2.03E-08 | 4.2582482 | ---     | --- | ---      |
| 3803418 | KLHL14     | NM_020805    | 6.2536448 | 0.095422338 | 0.6237821         | 4.72E-08 | 7.1058263 | ---     | --- | ---      |
| 3016380 | CUX1       | NM_181552    | 8.6866954 | 0.094528198 | <b>-0.5268543</b> | 9.17E-06 | 7.1844481 | 7.4E-05 | 2.0 | 7.2E-06  |
| 3040465 | TMEM196    | BC030104     | 5.4248078 | 0.094315867 | 0.6433256         | 1.30E-08 | 7.3626314 | ---     | --- | ---      |
| 3748400 | LOC220594  | NR_003554    | 5.2474406 | 0.093922457 | 0.5708291         | 1.03E-06 | 7.2161143 | 2.1E-07 | 2.5 | 2.2E-04  |
| 3018484 | GPR22      | NM_005295    | 4.8517351 | 0.09071059  | <b>-0.5374721</b> | 5.57E-06 | 9.9655286 | ---     | --- | ---      |
| 2619120 | TRAK1      | NM_001042646 | 5.1185073 | 0.08716633  | <b>-0.534106</b>  | 6.54E-06 | 7.1905521 | 2.2E-04 | 1.7 | 7.3E-01  |
| 3507003 | LNX2       | NM_153371    | 2.6989184 | 0.081800955 | 0.5950759         | 2.70E-07 | 6.6718832 | 4.9E-02 | 1.6 | 5.0E-02  |
| 2831436 | PSD2       | NM_032289    | 4.8694801 | 0.078119786 | 0.608209          | 1.24E-07 | 7.7055273 | ---     | --- | ---      |
| 2711751 | TMEM44     | NM_138399    | 12.321413 | 0.072531475 | 0.5424108         | 4.39E-06 | 6.5987946 | 9.9E-03 | 1.4 | 1.0E+00  |

|         |        |           |           |             |            |           |           |         |     |         |
|---------|--------|-----------|-----------|-------------|------------|-----------|-----------|---------|-----|---------|
| 3459722 | AVPR1A | NM_000706 | 3.5099632 | 0.071943648 | 0.506743   | 2.26E-05  | 5.3234636 | 3.6E-04 | 1.8 | 1.0E+00 |
| 2448382 | PTGS2  | NM_000963 | 3.1365841 | 0.06330677  | 0.5737072  | 8.87E-07  | 3.4164375 | ---     | --- | ---     |
| 2961647 | HTR1B  | NM_000863 | 1.5824172 | 0.051492422 | 0.5427916  | 4.31E-06  | 6.0164865 | ---     | --- | ---     |
| 2435347 | THEM4  | NM_053055 | 1.5446266 | 0.044265202 | 0.6060294  | 1.42E-07  | 4.4981059 | 2.0E-04 | 1.6 | 5.7E-70 |
| 3821392 | ZNF491 | NM_152356 | 4.736513  | 0.038541611 | -0.4996409 | 3.06E-05  | 5.1905571 | ---     | --- | ---     |
| 3111485 | TRHR   | NM_003301 | 5.0227169 | 0.026029291 | 0.4364811  | 0.0003486 | 4.36871   | ---     | --- | ---     |

**Table S18. M24 (orange): Non-PFC module**

|               |                |                 |           |                      |                   |           |           |         |          |          | NCTX ANOVA |
|---------------|----------------|-----------------|-----------|----------------------|-------------------|-----------|-----------|---------|----------|----------|------------|
| Transcript ID | Symbol         | Accession       | kTotal    | kWithin-Connectivity | eigencorr         | eigenpval | meanExpr  | DEX     | FoldChng | DAS      |            |
| 3917938       | <b>HUNK</b>    | NM_014586       | 59.880339 | 1                    | <b>-0.9553078</b> | 5.51E-34  | 6.2546989 | 9.5E-10 | 2.8      | 3.5E-11  |            |
| 2973376       | PTPRK          | NM_002844       | 76.404163 | 0.996999879          | 0.94621964        | 0         | 8.7030895 | 9.4E-06 | 2.6      | 2.7E-01  |            |
| 3132016       | <b>FGFR1</b>   | NM_023110       | 95.197024 | 0.804124723          | <b>-0.9034292</b> | 4.11E-24  | 5.3406151 | 5.5E-06 | 2.3      | 1.0E+00  |            |
| 2657967       | OSTN           | NM_198184       | 33.032876 | 0.78042043           | 0.92095784        | 0         | 5.758096  | 2.2E-11 | 3.9      | 2.2E-19  |            |
| 2590017       | ZNF385B        | NM_152520       | 49.40285  | 0.763065452          | 0.9102994         | 0         | 5.3191998 | 8.1E-07 | 2.1      | 0.0E+00  |            |
| 3385951       | <b>NOX4</b>    | NM_016931       | 77.691563 | 0.755895009          | <b>-0.9128379</b> | 2.07E-25  | 4.8926687 | 1.4E-05 | 2.1      | 3.2E-12  |            |
| 3690842       | <b>ZNF423</b>  | NM_015069       | 37.852935 | 0.744762108          | <b>-0.8805349</b> | 1.92E-21  | 6.4118107 | 2.9E-08 | 3.0      | 3.7E-03  |            |
| 3726618       | CACNA1G        | NM_018896       | 65.933958 | 0.732587471          | 0.90665438        | 0         | 6.2583913 | 6.4E-09 | 2.7      | 5.9E-48  |            |
| 3102096       | <b>DEPDC2</b>  | NM_024870       | 74.017919 | 0.72655152           | <b>-0.8802258</b> | 2.06E-21  | 5.293643  | 4.8E-04 | 2.0      | 7.9E-01  |            |
| 2628482       | FAM19A1        | NM_213609       | 77.455796 | 0.712828249          | 0.89170343        | 0         | 7.9467976 | 8.3E-06 | 3.1      | 2.6E-01  |            |
| 2980516       | <b>CNKSR3</b>  | NM_173515       | 34.489054 | 0.703888551          | <b>-0.8513655</b> | 9.62E-19  | 5.245798  | 2.2E-09 | 2.9      | 4.5E-203 |            |
| 4006280       | <b>NDP</b>     | NM_000266       | 30.558017 | 0.685335554          | <b>-0.8995698</b> | 1.28E-23  | 4.8453592 | 1.2E-14 | 3.2      | 1.0E-43  |            |
| 3218528       | <b>ABCA1</b>   | NM_005502       | 30.514837 | 0.665335689          | <b>-0.9031545</b> | 4.46E-24  | 5.4882921 | 9.8E-12 | 1.9      | 0.0E+00  |            |
| 3746574       | <b>PMP22</b>   | NM_000304       | 60.009135 | 0.663847506          | <b>-0.8901609</b> | 1.71E-22  | 5.7553392 | 2.0E-06 | 2.6      | 1.5E-05  |            |
| 3510126       | TRPC4          | NM_016179       | 39.030768 | 0.637723364          | 0.86446997        | 0         | 6.2958811 | 7.4E-13 | 3.0      | 1.4E-10  |            |
| 3019158       | LRRN3          | NM_001099660    | 69.270871 | 0.637334641          | 0.86530885        | 0         | 10.11321  | 4.0E-07 | 3.3      | 1.0E+00  |            |
| 3907072       | RIMS4          | NM_182970       | 81.711989 | 0.637011143          | 0.89400242        | 0         | 7.967105  | 1.6E-05 | 2.1      | 1.0E+00  |            |
| 3884324       | <b>CTNNB1</b>  | NM_030877       | 28.69767  | 0.634787526          | <b>-0.9003011</b> | 1.04E-23  | 6.9528451 | 1.6E-09 | 1.9      | 7.3E-23  |            |
| 3137120       | <b>CA8</b>     | NM_004056       | 27.732484 | 0.634429369          | <b>-0.9047955</b> | 2.72E-24  | 3.578754  | 6.3E-10 | 1.9      | 7.9E-01  |            |
| 2723752       | <b>TBC1D1</b>  | NM_015173       | 93.556999 | 0.634140035          | <b>-0.8705417</b> | 1.91E-20  | 6.2589047 | 1.0E-02 | 1.8      | 1.5E-02  |            |
| 3618333       | <b>MEIS2</b>   | NM_172316       | 28.910605 | 0.63149996           | <b>-0.8869767</b> | 3.89E-22  | 8.9268844 | 7.5E-15 | 3.7      | 2.7E-11  |            |
| 3444958       | <b>DUSP16</b>  | NM_030640       | 104.89077 | 0.62627759           | <b>-0.8696387</b> | 2.33E-20  | 5.7490586 | 3.4E-05 | 2.1      | 1.6E-134 |            |
| 2831350       | <b>CXXC5</b>   | NM_016463       | 38.525745 | 0.620964638          | <b>-0.8476578</b> | 1.93E-18  | 8.0048362 | 3.8E-06 | 2.0      | 4.1E-01  |            |
| 3136888       | <b>TOX</b>     | NM_014729       | 29.071472 | 0.620565185          | <b>-0.8778605</b> | 3.61E-21  | 8.0566187 | 2.2E-13 | 3.1      | 2.0E-01  |            |
| 3560403       | <b>EGLN3</b>   | NM_022073       | 29.507758 | 0.607384874          | <b>-0.8880508</b> | 2.96E-22  | 5.1833457 | 1.7E-08 | 2.3      | 2.1E-17  |            |
| 2387126       | RYR2           | NM_001035       | 61.642232 | 0.605742826          | 0.85261994        | 0         | 6.8441676 | 6.6E-06 | 2.2      | 3.0E-04  |            |
| 3391029       | <b>PPP2R1B</b> | NM_002716       | 55.874485 | 0.598262646          | <b>-0.8772219</b> | 4.20E-21  | 6.5192616 | 5.7E-04 | 1.6      | 1.0E-04  |            |
| 2855963       | HCN1           | NM_021072       | 72.171978 | 0.596819016          | 0.83571298        | 0         | 7.696767  | 6.7E-05 | 1.9      | 1.5E-01  |            |
| 3090436       | NEFM           | NM_005382       | 42.631327 | 0.591939028          | 0.8438845         | 0         | 8.8325232 | 1.0E-07 | 2.8      | 7.7E-01  |            |
| 2778440       | UNC5C          | NM_003728       | 65.853532 | 0.590186139          | 0.86858864        | 0         | 6.4568827 | 4.9E-09 | 2.4      | 1.8E-11  |            |
| 3128271       | NEFL           | NM_006158       | 29.758013 | 0.582908009          | 0.85670582        | 0         | 9.9271187 | 2.3E-13 | 7.7      | 7.6E-218 |            |
| 3877892       | PCSK2          | NM_002594       | 34.362527 | 0.579769714          | 0.87518565        | 0         | 8.3226092 | 2.2E-10 | 4.7      | 2.3E-11  |            |
| 3074912       | DGKI           | NM_004717       | 50.211702 | 0.563746742          | 0.85062525        | 0         | 7.6299564 | 1.6E-04 | 2.1      | 8.7E-02  |            |
| 2747961       | <b>FHDC1</b>   | NM_033393       | 53.09856  | 0.558418998          | <b>-0.8648877</b> | 6.45E-20  | 5.2624195 | 2.6E-03 | 1.8      | 1.4E-01  |            |
| 3200648       | <b>ADFP</b>    | NM_001122       | 54.849736 | 0.557806579          | <b>-0.8290716</b> | 4.84E-17  | 5.6821741 | 3.6E-03 | 1.8      | 8.7E-02  |            |
| 4018080       | <b>CHRDL1</b>  | NM_145234       | 29.242559 | 0.556005555          | <b>-0.8283447</b> | 5.45E-17  | 7.415718  | 3.0E-09 | 4.7      | 1.5E-119 |            |
| 3528759       | <b>ABHD4</b>   | NM_022060       | 40.11529  | 0.552192567          | <b>-0.8624761</b> | 1.07E-19  | 5.814864  | 1.2E-06 | 1.9      | 8.3E-02  |            |
| 2825907       | PRR16          | BC092474        | 24.886733 | 0.551566             | 0.87210417        | 0         | 4.5928749 | 8.3E-11 | 3.0      | 7.5E-76  |            |
| 2876793       | TRPC7          | NM_020389       | 27.439443 | 0.543571601          | 0.87243114        | 0         | 4.5225629 | 3.3E-13 | 3.1      | 1.2E-126 |            |
| 2945598       | KIAA0319       | NM_014809       | 77.531975 | 0.542362314          | 0.84363269        | 0         | 8.3141354 | 1.7E-03 | 1.8      | 1.0E+00  |            |
| 3889833       | DOK5           | NM_018431       | 32.240427 | 0.529350909          | 0.85730313        | 0         | 11.259514 | 2.8E-06 | 2.2      | 1.6E-06  |            |
| 2975014       | SGK1           | NM_005627       | 28.109464 | 0.528858322          | 0.84272449        | 0         | 7.2178495 | 2.1E-07 | 1.9      | 1.3E-01  |            |
| 2405576       | CSMD2          | NM_052896       | 60.35685  | 0.514545609          | 0.85802083        | 0         | 7.8034519 | 5.2E-05 | 2.0      | 1.2E-03  |            |
| 3962219       | <b>NAGA</b>    | NM_000262       | 37.504849 | 0.507738765          | <b>-0.8628222</b> | 9.92E-20  | 5.9206968 | 1.8E-04 | 1.7      | 4.7E-03  |            |
| 3222534       | <b>ASTN2</b>   | ENST00000313400 | 22.387376 | 0.504789082          | <b>-0.8571303</b> | 3.14E-19  | 6.2030825 | 1.1E-11 | 2.1      | 4.8E-19  |            |
| 3148871       | GOLSYN         | NM_001099744    | 126.51469 | 0.50215284           | 0.83439008        | 0         | 9.0552649 | 8.3E-04 | 2.3      | 1.0E+00  |            |
| 2368180       | GPR52          | NM_005684       | 30.331789 | 0.50137081           | 0.80045729        | 3.55E-15  | 7.2324213 | ---     | ---      | ---      |            |
| 3371114       | SYT13          | NM_020826       | 112.37389 | 0.498587782          | 0.84898151        | 0         | 9.6504982 | 1.7E-04 | 1.9      | 1.0E+00  |            |
| 2722823       | PCDH7          | NM_032456       | 20.658075 | 0.49508784           | 0.83615317        | 0         | 6.6679901 | 3.6E-13 | 3.6      | 3.5E-33  |            |
| 3345222       | <b>AMOTL1</b>  | NM_130847       | 65.372384 | 0.490114947          | <b>-0.8465675</b> | 2.35E-18  | 6.9188178 | 8.2E-03 | 1.6      | 1.0E+00  |            |
| 2576988       | <b>LYPD1</b>   | NM_144586       | 37.520147 | 0.482483568          | <b>-0.8353112</b> | 1.71E-17  | 6.9105935 | 7.0E-06 | 2.2      | 1.0E+00  |            |
| 3044597       | <b>PDE1C</b>   | NM_005020       | 40.446253 | 0.478284906          | <b>-0.847169</b>  | 2.11E-18  | 5.6572775 | 3.3E-04 | 1.9      | 9.4E-01  |            |
| 3897280       | PAK7           | NM_020341       | 24.404314 | 0.466868799          | 0.85925443        | 0         | 9.1496954 | 6.2E-08 | 2.1      | 2.5E-02  |            |
| 3303165       | <b>DNMBP</b>   | NM_015221       | 58.267861 | 0.463048482          | <b>-0.8284567</b> | 5.35E-17  | 4.153446  | 1.3E-04 | 1.5      | 7.8E-115 |            |
| 2849469       | ANKH           | NM_054027       | 25.656862 | 0.45964852           | 0.73881491        | 4.76E-12  | 8.9650994 | 6.2E-08 | 2.2      | 4.7E-01  |            |
| 2864449       | SERINC5        | BC101281        | 44.364643 | 0.456752212          | 0.84806308        | 0         | 8.7490385 | 5.6E-03 | 1.6      | 8.2E-03  |            |
| 3896257       | PROKR2         | NM_144773       | 28.078595 | 0.449841493          | 0.84023174        | 0         | 6.6027687 | ---     | ---      | ---      |            |
| 2338719       | <b>NFIA</b>    | NM_005595       | 31.860229 | 0.449002839          | <b>-0.7712254</b> | 1.41E-13  | 8.7302442 | 1.7E-06 | 2.5      | 1.0E+00  |            |
| 3324162       | LUZP2          | NM_001009909    | 44.365877 | 0.448908135          | 0.84050096        | 0         | 6.3721618 | 1.0E-06 | 3.6      | 1.5E-06  |            |
| 3164914       | <b>MTAP</b>    | NM_002451       | 22.608436 | 0.446155353          | <b>-0.8444034</b> | 3.49E-18  | 4.9372767 | 6.3E-08 | 1.6      | 6.2E-05  |            |
| 3212008       | FRMD3          | NM_174938       | 30.425694 | 0.445014416          | 0.84376056        | 0         | 7.1786835 | 3.0E-04 | 1.6      | 1.0E+00  |            |
| 2517588       | OSBP16         | NM_032523       | 64.978763 | 0.430573542          | 0.80740925        | 1.33E-15  | 7.0964747 | 1.2E-02 | 1.5      | 1.0E+00  |            |
| 2672190       | LRRC2          | NM_024512       | 35.411091 | 0.4251057            | 0.8214343         | 0         | 3.9765206 | 3.1E-06 | 1.8      | 1.2E-60  |            |
| 3047581       | INHBA          | NM_002192       | 22.009132 | 0.421357779          | 0.75295497        | 1.10E-12  | 5.9915054 | 2.3E-07 | 2.2      | 1.1E-106 |            |
| 3476097       | <b>CDK2AP1</b> | NM_004642       | 29.96509  | 0.420724013          | <b>-0.7850163</b> | 2.64E-14  | 9.005507  | 1.9E-09 | 2.8      | 1.3E-01  |            |
| 2865390       | EDIL3          | NM_005711       | 21.582662 | 0.412519198          | 0.8180241         | 2.22E-16  | 8.9245691 | 9.0E-05 | 2.2      | 1.0E+00  |            |
| 2415084       | <b>JUN</b>     | NM_002228       | 21.779521 | 0.41058536           | <b>-0.8022151</b> | 2.73E-15  | 6.9419616 | 3.0E-04 | 1.8      | 1.0E+00  |            |
| 2558612       | TGFA           | NM_003236       | 35.709551 | 0.409086654          | 0.83989037        | 0         | 4.6970033 | 2.8E-09 | 1.9      | 1.1E-10  |            |
| 3258713       | LG11           | NM_005097       | 56.795649 | 0.408638797          | 0.82136562        | 0         | 6.8179876 | 1.6E-03 | 2.6      | 4.8E-02  |            |
| 2400655       | RAP1GAP        | NM_002885       | 26.996562 | 0.404203911          | 0.80614666        | 1.55E-15  | 7.0713271 | 3.7E-07 | 2.0      | 1.7E-03  |            |
| 2371346       | RLG1           | NM_015149       | 23.152981 | 0.402164519          | 0.82982102        | 0         | 8.5979078 | 2.6E-03 | 1.5      | 5.4E-01  |            |
| 3596109       | FAM81A         | NM_152450       | 78.077861 | 0.400551961          | 0.80373815        | 2.22E-15  | 8.2180687 | 1.6E-03 | 2.2      | 1.0E+00  |            |

|         |              |                 |           |             |            |          |           |         |     |          |
|---------|--------------|-----------------|-----------|-------------|------------|----------|-----------|---------|-----|----------|
| 3652867 | SCNN1G       | NM_001039       | 17.957388 | 0.397878325 | -0.8245814 | 9.95E-17 | 4.5556792 | 2.2E-04 | 1.6 | 4.3E-01  |
| 2925590 | TMEM200A     | BC044246        | 54.312015 | 0.396418553 | 0.80414007 | 2.22E-15 | 5.1569562 | ---     | --- | ---      |
| 3154398 | ST3GAL1      | NM_003033       | 67.913562 | 0.386972314 | 0.81708223 | 4.44E-16 | 7.5280375 | 4.9E-07 | 1.6 | 7.8E-01  |
| 2782267 | NEUROG2      | NM_024019       | 27.598048 | 0.376149655 | -0.8136375 | 5.31E-16 | 6.2936024 | 3.9E-06 | 3.4 | 4.7E-02  |
| 3038065 | ICA1         | NM_004968       | 27.424283 | 0.37418182  | 0.81098129 | 8.88E-16 | 5.6505673 | 2.1E-03 | 1.5 | 1.0E+00  |
| 3882012 | DNMT3B       | NM_006892       | 16.457571 | 0.372897548 | -0.7459785 | 2.29E-12 | 5.4569517 | 2.2E-06 | 1.4 | 1.7E-01  |
| 2827865 | CHSY-2       | NM_175856       | 37.226352 | 0.372143265 | 0.80453808 | 2.00E-15 | 6.9332597 | ---     | --- | ---      |
| 3399004 | OPCML        | NM_001012393    | 26.050891 | 0.364872355 | 0.75323384 | 1.06E-12 | 8.9843876 | 3.1E-06 | 2.5 | 9.8E-19  |
| 3674199 | CPNE7        | NM_014427       | 61.45023  | 0.362185634 | 0.76312037 | 3.59E-13 | 5.9286902 | 1.5E-05 | 2.4 | 4.4E-72  |
| 2590491 | NEUROD1      | NM_002500       | 17.489361 | 0.360928096 | -0.8328485 | 2.60E-17 | 7.9056984 | ---     | --- | ---      |
| 3970714 | PPEF1        | NM_006240       | 40.698711 | 0.36077405  | 0.76260633 | 3.80E-13 | 6.1019805 | 2.6E-06 | 3.0 | 9.8E-170 |
| 3495968 | SLITRK5      | NM_015567       | 37.7781   | 0.359284625 | 0.78470455 | 2.75E-14 | 7.5813557 | 2.8E-06 | 2.4 | 1.0E+00  |
| 3647956 | NUBP1        | NM_002484       | 30.885853 | 0.356844389 | -0.7938323 | 8.47E-15 | 6.9584162 | 1.0E-02 | 1.5 | 1.0E+00  |
| 3020343 | MET          | NM_000245       | 17.428315 | 0.356799482 | 0.73883174 | 4.76E-12 | 4.8191643 | 3.5E-09 | 4.6 | 0.0E+00  |
| 2490351 | CTNNA2       | NM_004389       | 27.959369 | 0.35447846  | 0.79859596 | 4.44E-15 | 8.4515476 | 5.9E-03 | 1.6 | 1.9E-07  |
| 2346625 | ABHD7        | NM_173567       | 16.549022 | 0.353079526 | 0.81229603 | 6.66E-16 | 5.0535619 | 2.0E-05 | 2.0 | 1.2E-01  |
| 3510450 | LHFP         | NM_005780       | 17.569367 | 0.352560883 | 0.77793425 | 6.35E-14 | 7.0412192 | 7.1E-15 | 2.4 | 6.3E-05  |
| 2697863 | RBP1         | NM_002899       | 27.161601 | 0.347012498 | -0.8031185 | 2.40E-15 | 6.5128925 | 2.8E-03 | 2.3 | 8.5E-01  |
| 3456006 | CSAD         | NM_015989       | 24.672518 | 0.34349418  | 0.74221024 | 3.38E-12 | 7.9056943 | 1.7E-07 | 2.2 | 1.0E-08  |
| 2926802 | MYB          | NM_005375       | 53.428386 | 0.341433137 | -0.7964514 | 5.98E-15 | 4.6318932 | ---     | --- | ---      |
| 3305017 | OBFC1        | NM_024928       | 29.316009 | 0.340034651 | -0.8078929 | 1.23E-15 | 4.1431357 | 8.0E-06 | 1.7 | 1.0E+00  |
| 2591643 | COL5A2       | NM_000393       | 16.579377 | 0.337799818 | -0.8176216 | 2.93E-16 | 4.7123454 | 1.0E-10 | 1.7 | 1.0E+00  |
| 2941784 | NEDD9        | NM_006403       | 18.876175 | 0.337567288 | -0.761867  | 4.13E-13 | 6.4014773 | 6.9E-07 | 2.2 | 1.7E-08  |
| 3250863 | SGPL1        | NM_003901       | 20.297866 | 0.332088083 | -0.7659586 | 2.60E-13 | 8.3329478 | 2.4E-05 | 1.6 | 4.1E-01  |
| 2873785 | ALDH7A1      | NM_001182       | 22.471295 | 0.331952805 | -0.8023788 | 2.66E-15 | 7.2234139 | 2.2E-03 | 2.0 | 9.9E-01  |
| 2618499 | MYRIP        | NM_015460       | 23.541391 | 0.329535211 | 0.78756497 | 1.91E-14 | 4.6974665 | 2.5E-06 | 1.9 | 2.7E-01  |
| 3262715 | SORCS3       | NM_014978       | 26.69351  | 0.328447604 | 0.78915435 | 1.55E-14 | 6.4718667 | 3.1E-11 | 2.1 | 5.4E-122 |
| 3130757 | FUT10        | NM_032664       | 26.704221 | 0.327475703 | -0.80225   | 2.71E-15 | 4.6140711 | 1.8E-06 | 1.4 | 9.0E-01  |
| 3538087 | DACT1        | NM_016651       | 23.909463 | 0.327087361 | 0.80758692 | 1.33E-15 | 10.113989 | 1.1E-04 | 2.0 | 5.9E-04  |
| 2873897 |              | 3-Mar NM_178450 | 21.8991   | 0.325192416 | -0.7836142 | 3.15E-14 | 6.7839495 | 7.9E-07 | 2.2 | 9.3E-01  |
| 2973856 | SAMD3        | NM_001017373    | 16.313413 | 0.321347064 | 0.73632401 | 6.11E-12 | 3.452329  | ---     | --- | ---      |
| 3757770 | STAT5B       | NM_012448       | 15.145879 | 0.32004388  | -0.7783506 | 6.03E-14 | 6.1974726 | 1.5E-03 | 1.4 | 1.0E+00  |
| 2444415 | ANKRD45      | NM_198493       | 24.763481 | 0.317123412 | 0.78281602 | 3.46E-14 | 5.9148744 | 3.2E-04 | 1.6 | 6.6E-01  |
| 2560881 | LRRTM4       | NM_024993       | 12.944173 | 0.315690172 | 0.76583711 | 2.64E-13 | 8.8899386 | 4.8E-10 | 2.8 | 2.4E-05  |
| 3051655 | ECOP         | NM_030796       | 25.59872  | 0.312759384 | 0.75076531 | 1.39E-12 | 8.7931644 | 7.2E-08 | 2.0 | 9.6E-01  |
| 3093526 | UNC5D        | AY358147        | 20.202491 | 0.31128247  | -0.7312533 | 1.01E-11 | 8.1031732 | 8.8E-07 | 2.1 | 2.1E-08  |
| 3439178 | PXMP2        | NM_018663       | 36.960129 | 0.310991939 | -0.7836231 | 3.15E-14 | 7.7687575 | 1.5E-06 | 2.2 | 2.5E-01  |
| 3837707 | ZNF114       | NM_153608       | 14.608879 | 0.309288874 | -0.7852882 | 2.55E-14 | 4.2330413 | 1.2E-10 | 1.6 | 1.7E-54  |
| 2350952 | GSTM2        | NM_000848       | 23.568261 | 0.300441243 | -0.6883053 | 4.55E-10 | 7.4350197 | 3.1E-06 | 2.5 | 7.8E-104 |
| 3250602 | H2AFY2       | NM_018649       | 22.549213 | 0.288029916 | -0.7667429 | 2.38E-13 | 8.9909431 | 2.9E-04 | 1.5 | 1.0E+00  |
| 2602368 | DKFZp547H025 | NM_020161       | 13.022794 | 0.286661762 | 0.78711083 | 2.02E-14 | 3.691794  | 1.1E-11 | 3.3 | 2.7E-62  |
| 2908423 | SLC29A1      | NM_001078177    | 18.716554 | 0.283402401 | 0.78744083 | 1.95E-14 | 6.8201446 | 9.3E-04 | 1.6 | 1.2E-01  |
| 3373845 | SLC43A3      | NM_014096       | 19.022914 | 0.28300467  | -0.7553502 | 8.47E-13 | 5.7581003 | 5.0E-07 | 1.8 | 0.0E+00  |
| 3928668 | TIAM1        | NM_003253       | 26.194717 | 0.282920829 | 0.74224823 | 3.37E-12 | 7.2060145 | 3.3E-05 | 1.7 | 2.2E-03  |
| 2805232 | PDZD2        | NM_178140       | 39.680079 | 0.282845142 | 0.6941088  | 2.83E-10 | 7.4729317 | 9.2E-07 | 2.1 | 4.1E-04  |
| 2980449 | PIP3-E       | NM_015553       | 13.808818 | 0.282827274 | 0.75533518 | 8.49E-13 | 6.2974622 | ---     | --- | ---      |
| 3294854 | CAMK2G       | NM_172171       | 20.073214 | 0.282223244 | 0.73955491 | 4.42E-12 | 8.7074097 | 2.4E-05 | 1.7 | 1.0E+00  |
| 2674845 | CAMKV        | NM_024046       | 19.420149 | 0.280418526 | 0.68118831 | 8.05E-10 | 10.067354 | 1.9E-07 | 2.1 | 1.0E+00  |
| 2922972 | DCBLD1       | NM_173674       | 13.297622 | 0.279838235 | 0.73515884 | 6.86E-12 | 4.7104583 | 3.0E-06 | 2.2 | 6.7E-134 |
| 2646327 | C3orf58      | NM_173552       | 14.02821  | 0.268391763 | 0.69494791 | 2.64E-10 | 7.9259112 | 2.0E-06 | 2.0 | 7.7E-03  |
| 2910680 | LRRC1        | NM_018214       | 60.87852  | 0.266136693 | -0.7381372 | 5.10E-12 | 4.76432   | ---     | --- | ---      |
| 2848265 | CMBL         | NM_138809       | 12.297998 | 0.265059569 | 0.76611239 | 2.55E-13 | 5.9309131 | 8.9E-07 | 1.9 | 2.0E-01  |
| 3788560 | DCC          | NM_005215       | 17.474588 | 0.263020834 | -0.7021333 | 1.44E-10 | 7.666803  | 3.9E-08 | 2.1 | 5.7E-04  |
| 3111561 | PKHD1L1      | NM_177531       | 10.84048  | 0.261853219 | 0.73389083 | 7.77E-12 | 3.123844  | 6.9E-13 | 2.3 | 1.0E+00  |
| 2452667 | RAB7L1       | NM_003929       | 14.403534 | 0.253473521 | 0.75998371 | 5.09E-13 | 5.6129141 | 1.3E-04 | 1.8 | 1.7E-36  |
| 3395464 | ASAM         | NM_024769       | 12.221471 | 0.253447245 | -0.7740456 | 1.01E-13 | 8.5701894 | 8.9E-13 | 2.1 | 3.6E-03  |
| 2879312 | NR3C1        | NM_000176       | 12.140228 | 0.247518653 | 0.77366324 | 1.06E-13 | 5.4658853 | 3.2E-04 | 1.8 | 4.1E-30  |
| 3553531 | TNFAIP2      | NM_006291       | 37.514957 | 0.246161855 | 0.71054195 | 6.89E-11 | 5.4531048 | 2.8E-11 | 1.8 | 3.2E-117 |
| 2626802 | PTPRG        | NM_002841       | 14.651937 | 0.245582141 | 0.7351651  | 6.86E-12 | 6.9212318 | 1.9E-05 | 1.9 | 2.5E-15  |
| 2816681 | PDE8B        | NM_003719       | 14.647632 | 0.240120353 | -0.7503795 | 1.44E-12 | 5.3435204 | 2.7E-05 | 1.8 | 1.0E+00  |
| 3216356 | CDC14B       | AF064105        | 17.888497 | 0.240059168 | -0.7323595 | 9.03E-12 | 4.4063516 | 6.9E-03 | 1.7 | 5.8E-01  |
| 2438411 | NES          | NM_006617       | 14.247783 | 0.237257043 | -0.7735822 | 1.07E-13 | 6.9744772 | 1.2E-06 | 2.3 | 2.7E-07  |
| 3094778 | TACC1        | NM_006283       | 14.364493 | 0.234039776 | -0.7558636 | 8.01E-13 | 5.8697969 | 6.8E-05 | 1.5 | 6.5E-01  |
| 2440476 | F11R         | NM_144503       | 14.852234 | 0.231822461 | 0.7699045  | 1.65E-13 | 5.8894415 | 2.0E-06 | 1.6 | 2.1E-198 |
| 2396461 | SRM          | NM_003132       | 14.43511  | 0.231590742 | -0.7250828 | 1.82E-11 | 10.065314 | 5.4E-08 | 2.3 | 1.0E+00  |
| 3019793 | FOXP2        | NM_148898       | 17.725659 | 0.226320951 | 0.71823392 | 3.44E-11 | 5.3886244 | 2.4E-06 | 1.7 | 3.1E-130 |
| 3258384 | CYP26A1      | NM_000783       | 13.910253 | 0.220412618 | -0.7131799 | 5.44E-11 | 5.0937994 | 1.7E-08 | 2.1 | 3.9E-01  |
| 3074039 | SLC35B4      | NM_032826       | 21.222538 | 0.2193074   | 0.75341073 | 1.04E-12 | 7.3269402 | ---     | --- | ---      |
| 2991233 | AHR          | NM_001621       | 10.746712 | 0.211267627 | 0.72485936 | 1.86E-11 | 4.9150822 | 4.1E-03 | 1.5 | 3.3E-51  |
| 2911003 | HCRTR2       | NM_001526       | 19.540691 | 0.206381418 | -0.6974662 | 2.14E-10 | 6.6510087 | 2.0E-05 | 3.1 | 3.2E-01  |
| 2769095 | ---          | ---             | 9.3094363 | 0.206069034 | 0.64265631 | 1.36E-08 | 3.9596346 | 3.9E-11 | 2.0 | 1.0E+00  |
| 2586603 | TLK1         | NM_012290       | 11.552187 | 0.205989958 | 0.74239474 | 3.32E-12 | 6.6045749 | 3.2E-06 | 2.1 | 1.2E-16  |
| 2464129 | ---          | ---             | 13.824519 | 0.204148083 | 0.70961527 | 7.48E-11 | 5.3077013 | ---     | --- | ---      |
| 3941793 | KREMEN1      | NM_001039570    | 12.509264 | 0.202962348 | 0.60599006 | 1.42E-07 | 6.1410551 | 9.2E-08 | 1.9 | 1.3E-02  |
| 2496382 | NPAS2        | NM_002518       | 8.0844568 | 0.197619511 | 0.62911668 | 3.35E-08 | 6.7821063 | 1.4E-09 | 1.9 | 0.0E+00  |
| 3230811 | DPP7         | NM_013379       | 12.158033 | 0.196627173 | -0.6688411 | 2.08E-09 | 7.2496854 | 5.7E-10 | 2.3 | 1.5E-07  |
| 4045643 | S100A16      | NM_080388       | 14.124712 | 0.188159238 | -0.7171461 | 3.80E-11 | 5.0188618 | 6.4E-07 | 2.0 | 1.0E+00  |

|         |               |              |           |             |            |           |           |         |     |          |
|---------|---------------|--------------|-----------|-------------|------------|-----------|-----------|---------|-----|----------|
| 2623568 | PPM1M         | NM_144641    | 10.373478 | 0.187447706 | 0.73537978 | 6.71E-12  | 5.6812924 | 3.3E-03 | 1.3 | 3.9E-02  |
| 3956768 | RASL10A       | NM_001007279 | 14.064987 | 0.186725227 | 0.61920625 | 6.31E-08  | 6.4455818 | 2.3E-13 | 5.0 | 8.4E-22  |
| 2911226 | C6orf65       | NM_152731    | 10.428579 | 0.185424237 | 0.65911341 | 4.27E-09  | 5.0668168 | 4.9E-05 | 1.7 | 1.0E-135 |
| 3756928 | KRT31         | NM_002277    | 10.276392 | 0.183208027 | -0.6527154 | 6.76E-09  | 7.0584281 | ---     | --- | ---      |
| 2503929 | CNTNAP5       | NM_130773    | 10.15024  | 0.181076101 | 0.64447729 | 1.20E-08  | 6.8538978 | 3.7E-06 | 1.7 | 0.0E+00  |
| 3264621 | TCF7L2        | NM_030756    | 17.698888 | 0.180458589 | -0.7320636 | 9.30E-12  | 4.4947513 | 5.7E-03 | 1.6 | 4.2E-02  |
| 3428190 | SLC17A8       | NM_139319    | 10.731735 | 0.178265987 | -0.7275856 | 1.43E-11  | 4.0384343 | 1.3E-04 | 3.4 | 5.3E-115 |
| 2340961 | IL12RB2       | NM_001559    | 15.246734 | 0.176398215 | 0.72458547 | 1.90E-11  | 4.6930651 | 1.1E-04 | 2.0 | 2.5E-71  |
| 2835848 | SLC36A1       | NM_078483    | 9.8482527 | 0.174304131 | 0.7254976  | 1.75E-11  | 7.2160533 | 4.3E-04 | 1.9 | 1.0E+00  |
| 3070309 | CADPS2        | NM_017954    | 10.695829 | 0.173396395 | 0.69689168 | 2.24E-10  | 3.9667224 | 4.1E-05 | 1.9 | 1.0E+00  |
| 2922521 | NT5DC1        | NM_152729    | 11.293624 | 0.168956032 | -0.6819574 | 7.57E-10  | 3.9442887 | 8.6E-05 | 1.5 | 3.7E-01  |
| 3672059 | KIAA0513      | NM_014732    | 46.596579 | 0.167182875 | 0.59623236 | 2.52E-07  | 7.7294835 | 2.6E-04 | 1.9 | 4.6E-03  |
| 2957227 | TRAM2         | NM_012288    | 9.3928135 | 0.16495394  | -0.7312058 | 1.01E-11  | 4.6031027 | 1.4E-06 | 1.5 | 1.0E+00  |
| 2694001 | MGLL          | NM_007283    | 10.320752 | 0.163077006 | 0.53077503 | 7.65E-06  | 7.7520558 | 9.0E-07 | 1.7 | 5.6E-178 |
| 2965653 | GPR63         | NM_030784    | 8.8888545 | 0.162702785 | 0.71701746 | 3.85E-11  | 7.4464218 | ---     | --- | ---      |
| 2608725 | BHLHB2        | NM_003670    | 6.382592  | 0.160845745 | 0.55590351 | 2.25E-06  | 4.7607145 | 4.5E-17 | 3.6 | 2.4E-133 |
| 3466499 | USP44         | NM_032147    | 15.279761 | 0.159087288 | -0.7436054 | 2.93E-12  | 3.304093  | ---     | --- | ---      |
| 3002873 | LANCL2        | NM_018697    | 14.340457 | 0.15849468  | 0.69497008 | 2.63E-10  | 8.6805261 | 3.3E-07 | 1.9 | 1.0E+00  |
| 3444252 | CSDA          | NM_003651    | 7.1045792 | 0.156303182 | -0.643177  | 1.31E-08  | 6.3719474 | 1.0E-09 | 3.1 | 2.4E-14  |
| 3442427 | MBOAT5        | NM_005768    | 12.769169 | 0.15397687  | -0.6706963 | 1.81E-09  | 7.1076275 | 2.4E-03 | 1.4 | 1.7E-01  |
| 3319137 | PPFIBP2       | NM_003621    | 8.2367681 | 0.152268559 | -0.6729344 | 1.53E-09  | 5.0887048 | 1.2E-10 | 1.8 | 0.0E+00  |
| 2836518 | GALNT10       | NM_198321    | 7.5152962 | 0.146055208 | 0.55349609 | 2.54E-06  | 6.3576352 | 2.2E-08 | 2.0 | 1.7E-59  |
| 3073267 | PLXNA4        | NM_020911    | 8.7630902 | 0.129400778 | 0.70178253 | 1.48E-10  | 7.4107616 | 6.8E-06 | 1.8 | 1.1E-01  |
| 2569215 | ST6GAL2       | NM_032528    | 5.7427246 | 0.128531426 | 0.59104354 | 3.40E-07  | 9.0054789 | 2.0E-06 | 2.1 | 1.0E+00  |
| 2977122 | NMBR          | NM_002511    | 5.7757614 | 0.126041769 | 0.67329013 | 1.49E-09  | 4.9713068 | 2.1E-03 | 1.9 | 1.0E+00  |
| 2694817 | PLXND1        | NM_015103    | 11.892039 | 0.124369137 | 0.5304604  | 7.76E-06  | 6.0317653 | 2.2E-13 | 2.7 | 1.0E+00  |
| 2613293 | KCNH8         | NM_144633    | 18.788765 | 0.114179393 | -0.5565401 | 2.18E-06  | 6.2887762 | ---     | --- | ---      |
| 2350922 | GSTM4         | NM_000850    | 7.467699  | 0.107988512 | -0.6698005 | 1.94E-09  | 4.1268573 | 2.9E-02 | 1.5 | 1.0E+00  |
| 3779950 | C18orf1       | NM_181481    | 14.121125 | 0.105409628 | 0.54190235 | 4.50E-06  | 7.8238522 | 8.1E-05 | 2.4 | 1.9E-07  |
| 3219885 | PTPN3         | NM_002829    | 10.771988 | 0.101498598 | 0.45999354 | 0.0001489 | 4.2018389 | 1.5E-06 | 1.9 | 0.0E+00  |
| 2489172 | MTHFD2        | NM_001040409 | 7.0413726 | 0.097994393 | 0.68091019 | 8.23E-10  | 6.9227229 | ---     | --- | ---      |
| 3780334 | MC5R          | NM_005913    | 7.544227  | 0.093749229 | 0.66820048 | 2.19E-09  | 4.2393997 | ---     | --- | ---      |
| 2401193 | LUZP1         | NM_033631    | 4.7097679 | 0.090679869 | -0.6200237 | 5.99E-08  | 5.2411555 | 1.4E-05 | 1.3 | 1.0E+00  |
| 2546874 | GALNT14       | NM_024572    | 6.2859753 | 0.089291556 | -0.6016398 | 1.84E-07  | 5.7426122 | 4.7E-04 | 1.4 | 1.0E+00  |
| 2872848 | LOX           | NM_002317    | 5.5738747 | 0.081703896 | 0.51325    | 1.70E-05  | 4.6999613 | 3.9E-09 | 1.9 | 1.6E-41  |
| 2734270 | CDS1          | NM_001263    | 5.3053807 | 0.074651671 | 0.63183597 | 2.81E-08  | 5.6898937 | ---     | --- | ---      |
| 3463056 | CSRP2         | NM_001321    | 3.7133488 | 0.072184064 | -0.544323  | 4.00E-06  | 8.5379257 | 2.1E-09 | 3.0 | 5.9E-01  |
| 2529421 | SGPP2         | NM_152386    | 4.3559564 | 0.071151586 | 0.43381715 | 0.0003824 | 4.5478608 | ---     | --- | ---      |
| 2731636 | DKFZP564O0823 | NM_015393    | 6.4573378 | 0.068005966 | 0.50459064 | 2.48E-05  | 5.2285811 | 2.2E-06 | 1.7 | 9.0E-01  |
| 3773241 | TBC1D16       | AL512709     | 6.3386397 | 0.066686693 | 0.43817788 | 0.0003285 | 8.3322134 | ---     | --- | ---      |
| 3773244 | TBC1D16       | NM_019020    | 23.802612 | 0.064990973 | 0.43108058 | 0.0004202 | 6.8484206 | 1.3E-03 | 1.5 | 1.0E+00  |
| 3958253 | C22orf28      | NM_014306    | 3.3505301 | 0.063830054 | -0.5534554 | 2.54E-06  | 7.090373  | 1.9E-03 | 1.3 | 1.0E+00  |
| 3845944 | GNG7          | NM_052847    | 6.2768889 | 0.063507807 | -0.5536221 | 2.52E-06  | 6.7053889 | 3.7E-05 | 1.8 | 1.0E+00  |
| 3181240 | TMOD1         | NM_003275    | 3.3229709 | 0.056977372 | 0.36547114 | 0.0032257 | 9.283136  | 1.2E-10 | 3.0 | 7.0E-01  |
| 3414776 | LETMD1        | NM_015416    | 4.2421225 | 0.056917996 | 0.60282684 | 1.71E-07  | 7.4303105 | ---     | --- | ---      |
| 3518418 | KCTD12        | NM_138444    | 6.6341148 | 0.054317692 | 0.40502876 | 0.000992  | 9.1930608 | 3.2E-06 | 2.1 | 2.1E-02  |
| 3977067 | PLP2          | NM_002668    | 4.4227165 | 0.047086505 | 0.4314051  | 0.0004155 | 6.3147617 | 8.5E-03 | 1.6 | 3.0E-02  |
| 3389647 | GUCY1A2       | NM_000855    | 3.2079156 | 0.034303444 | 0.32787323 | 0.0087096 | 9.2730347 | 1.1E-04 | 1.8 | 1.0E+00  |
| 3108782 | KCNS2         | NM_020697    | 1.9259138 | 0.033824396 | -0.5608524 | 1.75E-06  | 5.7622111 | ---     | --- | ---      |
| 3148703 | TMEM74        | BC030710     | 2.0493562 | 0.028954604 | 0.45999614 | 0.0001489 | 7.5881819 | 6.5E-04 | 1.7 | 1.0E+00  |



**Table S19. M39 (gold3): Alternative splicing module**

| Transcript ID | Symbol    | Accession    | kTotal    | kWithin-Connectivity | eigencorr | eigenpval | 5-region ANOVA |          |         | Annotated w/ GO BP RNA processing and splicing terms? |
|---------------|-----------|--------------|-----------|----------------------|-----------|-----------|----------------|----------|---------|-------------------------------------------------------|
|               |           |              |           |                      |           |           | DEX            | FoldChng | DAS     |                                                       |
| 2552153       | FBXO11    | NM_012167    | 99.258062 | 0.99999952           | 0.9593231 | 0         | --             | --       | --      |                                                       |
| 2753994       | FLJ12716  | NM_199053    | 89.73523  | 0.945511898          | 0.9478261 | 0         | --             | --       | --      |                                                       |
| 2989493       | FLJ20323  | NM_019005    | 100.18449 | 0.941170474          | 0.9462285 | 0         | --             | --       | --      |                                                       |
| 27771718      | FLJ10808  | NM_018227    | 91.603228 | 0.924432378          | 0.9252632 | 0         | 3.9E-01        | 1.2      | 2.1E-04 |                                                       |
| 3061046       | KRIT1     | NM_194455    | 96.557359 | 0.910709031          | 0.9391943 | 0         | --             | --       | --      |                                                       |
| 2510485       | RIF1      | NM_018151    | 90.421019 | 0.910616116          | 0.9255702 | 0         | 1.2E-01        | 1.3      | 4.0E-04 |                                                       |
| 2651671       | MYNN      | NM_018657    | 84.606465 | 0.889023303          | 0.9323442 | 0         | 8.5E-01        | 1.2      | 4.9E-04 |                                                       |
| 2556215       | VPS54     | NM_016516    | 93.251335 | 0.887663236          | 0.9463693 | 0         | --             | --       | --      |                                                       |
| 2585236       | TTC21B    | NM_024753    | 92.883505 | 0.881909611          | 0.9407416 | 0         | 9.7E-01        | 1.2      | 1.3E-05 |                                                       |
| 2867693       | KIAA0372  | NM_014639    | 79.443338 | 0.855856268          | 0.9141782 | 0         | 3.2E-01        | 1.2      | 6.1E-04 |                                                       |
| 3010030       | RSBN1L    | NM_198467    | 87.069095 | 0.84812977           | 0.9274878 | 0         | 6.7E-03        | 1.4      | 6.5E-04 |                                                       |
| 2744597       | NARG1     | NM_057175    | 82.251198 | 0.836593903          | 0.9244026 | 0         | --             | --       | --      |                                                       |
| 2488114       | ZNF638    | NM_001014972 | 83.322408 | 0.834235467          | 0.92407   | 0         | 2.7E-01        | 1.2      | 5.7E-05 | Yes                                                   |
| 2857131       | DHX29     | NM_019030    | 77.35847  | 0.831150419          | 0.9271537 | 0         | --             | --       | --      |                                                       |
| 2831124       | MATR3     | NM_199189    | 83.74298  | 0.83011067           | 0.9307141 | 0         | --             | --       | --      |                                                       |
| 2461786       | ARID4B    | NM_016374    | 81.834745 | 0.805773248          | 0.9184076 | 0         | --             | --       | --      |                                                       |
| 2419113       | USP33     | NM_201624    | 90.505818 | 0.792532111          | 0.9175493 | 0         | --             | --       | --      |                                                       |
| 2928392       | C6orf55   | NM_016485    | 77.329614 | 0.79073862           | 0.9248058 | 0         | --             | --       | --      |                                                       |
| 2907190       | UBR2      | NM_015255    | 80.732689 | 0.78789693           | 0.9217767 | 0         | --             | --       | --      |                                                       |
| 2913983       | SENPE6    | NM_015571    | 80.342022 | 0.777630412          | 0.9171612 | 0         | --             | --       | --      |                                                       |
| 2476075       | SPAST     | NM_199436    | 72.77832  | 0.775911988          | 0.9198537 | 0         | --             | --       | --      |                                                       |
| 2588066       | ATF2      | NM_001880    | 78.080293 | 0.775842699          | 0.9193084 | 0         | 6.6E-02        | 1.3      | 1.0E-03 |                                                       |
| 3101893       | FSIP2     | NM_173651    | 80.463984 | 0.775124831          | 0.9216397 | 0         | --             | --       | --      |                                                       |
| 2633587       | FLJ11046  | NM_018309    | 103.3634  | 0.769203067          | 0.9172531 | 0         | --             | --       | --      |                                                       |
| 2548871       | HNRPLL    | NM_138394    | 74.917442 | 0.768664332          | 0.92726   | 0         | --             | --       | --      | Yes                                                   |
| 2922840       | KPNA5     | NM_002269    | 71.633435 | 0.766163527          | 0.9143875 | 0         | 2.0E-01        | 1.4      | 1.4E-04 |                                                       |
| 2601544       | CUL3      | NM_003590    | 76.164427 | 0.753926913          | 0.9214872 | 0         | --             | --       | --      |                                                       |
| 2928874       | PEX3      | NM_003630    | 75.496688 | 0.752770399          | 0.9343931 | 0         | --             | --       | --      |                                                       |
| 2963929       | RNGTT     | NM_003800    | 77.038179 | 0.747981067          | 0.9280415 | 0         | --             | --       | --      | Yes                                                   |
| 2767790       | GNPDA2    | NM_138335    | 88.077124 | 0.742591893          | 0.9269627 | 0         | --             | --       | --      |                                                       |
| 2593670       | SF3B1     | NM_012433    | 70.837498 | 0.728780595          | 0.9072385 | 0         | 6.4E-01        | 1.3      | 2.6E-04 | Yes                                                   |
| 2700197       | SMARCA3   | NM_003071    | 74.740614 | 0.723541565          | 0.9089743 | 0         | 1.0E+00        | 1.2      | 1.7E-04 |                                                       |
| 2746024       | ABCE1     | NM_002940    | 88.511323 | 0.719988614          | 0.9033409 | 0         | --             | --       | --      |                                                       |
| 2599433       | USP37     | NM_020935    | 70.503712 | 0.716531352          | 0.915914  | 0         | 3.5E-01        | 1.2      | 7.7E-04 |                                                       |
| 2911303       | ZNF451    | NM_015555    | 68.74734  | 0.71514595           | 0.9052714 | 0         | --             | --       | --      |                                                       |
| 2686646       | BTF3      | NM_001207    | 78.085482 | 0.713992648          | 0.909254  | 0         | --             | --       | --      |                                                       |
| 2962998       | C6orf84   | NM_014895    | 73.740078 | 0.708726869          | 0.9137856 | 0         | --             | --       | --      |                                                       |
| 2499158       | RANBP2    | NM_006267    | 83.534477 | 0.701322256          | 0.8877117 | 0         | --             | --       | --      |                                                       |
| 2698738       | XRN1      | NM_019001    | 72.187639 | 0.696182068          | 0.8966268 | 0         | --             | --       | --      |                                                       |
| 2418000       | ZNF265    | NM_203350    | 78.711783 | 0.692001806          | 0.9037477 | 0         | --             | --       | --      | Yes                                                   |
| 2612278       | CAPN7     | NM_014296    | 80.190896 | 0.691960468          | 0.9156503 | 0         | --             | --       | --      |                                                       |
| 2346934       | MTF2      | NM_007358    | 65.301714 | 0.671667435          | 0.8945751 | 0         | --             | --       | --      |                                                       |
| 3017795       | RINT-1    | NM_021930    | 63.667756 | 0.667158175          | 0.9169709 | 0         | --             | --       | --      |                                                       |
| 2826064       | SRFBP1    | NM_152546    | 62.526607 | 0.661316087          | 0.9157243 | 0         | --             | --       | --      |                                                       |
| 2666478       | TOP2B     | NM_001068    | 61.495305 | 0.653595914          | 0.8870097 | 0         | 4.1E-02        | 1.3      | 5.1E-04 |                                                       |
| 3019401       | ZNF277    | NM_021994    | 68.725417 | 0.652226927          | 0.9066381 | 0         | --             | --       | --      |                                                       |
| 2417791       | ANKRD13C  | NM_030816    | 62.747126 | 0.649104495          | 0.9029319 | 0         | --             | --       | --      |                                                       |
| 2824483       | YTHDC2    | NM_022828    | 65.082627 | 0.648876003          | 0.8854486 | 0         | 1.0E+00        | 1.2      | 3.1E-05 |                                                       |
| 3030285       | CUL1      | NM_003592    | 60.690087 | 0.643092226          | 0.9127289 | 0         | 4.4E-01        | 1.2      | 4.4E-04 |                                                       |
| 2512330       | MARCH7    | NM_022826    | 69.39465  | 0.641808726          | 0.8975667 | 0         | --             | --       | --      |                                                       |
| 2484305       | PAPOLG    | NM_022894    | 70.727403 | 0.636557721          | 0.8849898 | 0         | --             | --       | --      | Yes                                                   |
| 2415910       | DOCK7     | NM_033407    | 63.042821 | 0.634173763          | 0.8809271 | 0         | --             | --       | --      |                                                       |
| 2348060       | PTBP2     | NM_021190    | 73.515626 | 0.632522506          | 0.8799114 | 0         | 1.0E-06        | 1.5      | 5.6E-02 | Yes                                                   |
| 2617041       | GOLGA4    | NM_002078    | 81.650774 | 0.630411138          | 0.897495  | 0         | --             | --       | --      |                                                       |
| 2884658       | SLU7      | NM_006425    | 65.197766 | 0.630089069          | 0.9090047 | 0         | --             | --       | --      | Yes                                                   |
| 2419235       | FUBP1     | NM_003902    | 61.738324 | 0.629770807          | 0.8873005 | 0         | 4.9E-03        | 1.3      | 2.3E-08 |                                                       |
| 2911257       | KIAA1586  | NM_020931    | 66.776677 | 0.629415779          | 0.8908534 | 0         | 5.4E-03        | 1.6      | 1.3E-04 |                                                       |
| 2380991       | IARS2     | NM_018060    | 76.087181 | 0.629381027          | 0.9021891 | 0         | 8.4E-01        | 1.3      | 1.3E-03 |                                                       |
| 2525852       | LOC440001 | XM_495848    | 84.32589  | 0.624112996          | 0.8769149 | 0         | --             | --       | --      |                                                       |
| 2741083       | KIAA1627  | NM_020961    | 77.807783 | 0.623097271          | 0.898671  | 0         | --             | --       | --      |                                                       |
| 2728448       | POLR2B    | NM_000938    | 71.93637  | 0.622455164          | 0.8818516 | 0         | 4.1E-06        | 1.7      | 6.8E-03 |                                                       |
| 2813364       | SLC30A5   | NM_024055    | 66.327896 | 0.62071563           | 0.9132901 | 0         | 9.6E-01        | 1.2      | 4.1E-05 |                                                       |
| 3068519       | FLJ31818  | NM_152556    | 61.450898 | 0.620287747          | 0.9082991 | 0         | --             | --       | --      |                                                       |
| 2766588       | SCC-112   | NM_015200    | 58.941945 | 0.619808563          | 0.8850611 | 0         | 3.4E-01        | 1.2      | 4.8E-04 |                                                       |
| 2448971       | UCHL5     | NM_015984    | 84.765564 | 0.618801973          | 0.9030705 | 0         | --             | --       | --      |                                                       |
| 2905118       | SFRS3     | NM_003017    | 64.640973 | 0.618552439          | 0.8954906 | 0         | --             | --       | --      | Yes                                                   |
| 2879927       | LARS      | NM_020117    | 61.381456 | 0.617314022          | 0.8955911 | 0         | 7.9E-01        | 1.1      | 2.1E-03 |                                                       |
| 2354082       | WDR3      | NM_006784    | 66.852778 | 0.617276616          | 0.9130672 | 0         | 1.0E+00        | 1.2      | 1.2E-16 | Yes                                                   |
| 2476219       | BIRC6     | NM_016252    | 55.898759 | 0.617053741          | 0.887991  | 0         | 3.8E-01        | 1.2      | 1.1E-05 |                                                       |
| 2427720       | MGC54289  | NM_178454    | 87.366267 | 0.616711131          | 0.9016805 | 0         | 9.6E-01        | 1.2      | 5.2E-05 |                                                       |
| 2806799       | NIPBL     | NM_015384    | 61.434313 | 0.615906872          | 0.8796096 | 0         | --             | --       | --      |                                                       |
| 2346738       | C1orf82   | NM_024813    | 56.247774 | 0.613809301          | 0.9037709 | 0         | --             | --       | --      |                                                       |
| 2810458       | GPBP1     | NM_022913    | 62.978196 | 0.607466472          | 0.8832003 | 0         | --             | --       | --      |                                                       |
| 2512701       | PSMD14    | NM_005805    | 72.604562 | 0.606944471          | 0.897866  | 0         | --             | --       | --      |                                                       |
| 2594497       | CLK1      | NM_004071    | 65.609352 | 0.602191788          | 0.882388  | 0         | 1.0E-02        | 1.7      | 3.8E-04 |                                                       |
| 2857301       | FLJ90709  | NM_173514    | 57.232857 | 0.601115673          | 0.9088243 | 0         | --             | --       | --      |                                                       |

|         |            |              |           |             |           |   |         |     |         |     |
|---------|------------|--------------|-----------|-------------|-----------|---|---------|-----|---------|-----|
| 2686727 | ZBTB11     | NM_014415    | 54.565211 | 0.60069052  | 0.889667  | 0 | --      | --  | --      |     |
| 2816030 | POLK       | NM_016218    | 66.804083 | 0.599231482 | 0.8901499 | 0 | --      | --  | --      |     |
| 2372141 | C1orf27    | NM_017847    | 66.374829 | 0.597106884 | 0.8913471 | 0 | --      | --  | --      |     |
| 2581430 | STAM2      | NM_005843    | 72.704782 | 0.592182948 | 0.880014  | 0 | 1.0E+00 | 1.1 | 3.8E-04 |     |
| 2366132 | TIPRL      | NM_152902    | 88.653551 | 0.587021667 | 0.8841196 | 0 | --      | --  | --      |     |
| 2348702 | LOC440596  | XM_498746    | 60.447335 | 0.580845369 | 0.8809973 | 0 | 8.6E-02 | 1.3 | 1.2E-03 |     |
| 2739079 | SEC24B     | NM_006323    | 67.042846 | 0.580812288 | 0.9052646 | 0 | 1.0E+00 | 1.1 | 2.4E-03 |     |
| 2456746 | BPNT1      | NM_006085    | 61.972566 | 0.580755789 | 0.8840729 | 0 | --      | --  | --      |     |
| 2990043 | PHF14      | NM_014660    | 86.938651 | 0.57694158  | 0.8761079 | 0 | 1.0E+00 | 1.1 | 4.7E-05 |     |
| 2445141 | RFWD2      | NM_001001740 | 57.516303 | 0.576398399 | 0.8810604 | 0 | --      | --  | --      |     |
| 2642911 | UBE1DC1    | NM_198329    | 77.024021 | 0.574838754 | 0.8783016 | 0 | 1.0E+00 | 1.1 | 1.2E-03 |     |
| 2459866 | NUP133     | NM_018230    | 74.749924 | 0.571480161 | 0.8944709 | 0 | 1.0E+00 | 1.2 | 6.6E-09 |     |
| 2523144 | NOP5/NOP58 | NM_015934    | 56.587658 | 0.571192806 | 0.8853701 | 0 | --      | --  | --      | Yes |
| 2645275 | SLC25A36   | NM_018155    | 64.382556 | 0.569530647 | 0.8724442 | 0 | --      | --  | --      |     |
| 2727913 | SEC3L1     | NM_001024924 | 72.464339 | 0.567637059 | 0.8509145 | 0 | --      | --  | --      |     |
| 2963313 | SNX14      | NM_020468    | 70.740111 | 0.567187816 | 0.8713239 | 0 | --      | --  | --      |     |
| 2768468 | KIAA0826   | XM_093839    | 54.884868 | 0.567165069 | 0.8885821 | 0 | --      | --  | --      |     |
| 2559649 | CGI-121    | NM_016058    | 59.278329 | 0.566639206 | 0.9037494 | 0 | --      | --  | --      |     |
| 2956438 | MUT        | NM_000255    | 77.483452 | 0.563499309 | 0.8827825 | 0 | --      | --  | --      |     |
| 2814527 | BDP1       | NM_018429    | 61.19638  | 0.562330021 | 0.867392  | 0 | --      | --  | --      |     |
| 2844709 | CNOT6      | NM_015455    | 60.421255 | 0.562262702 | 0.8730352 | 0 | 7.5E-03 | 1.5 | 3.7E-04 |     |
| 2868523 | CHD1       | NM_001270    | 58.152992 | 0.562076427 | 0.8798469 | 0 | --      | --  | --      |     |
| 2448073 | IVNS1ABP   | NM_016389    | 65.74733  | 0.557584394 | 0.8723565 | 0 | 1.3E-05 | 1.8 | 1.2E-04 | Yes |
| 2900423 | ZNF187     | NM_001023560 | 52.653868 | 0.557397984 | 0.8959512 | 0 | --      | --  | --      |     |
| 2862716 | GFM2       | NM_170691    | 64.85627  | 0.557322193 | 0.8938755 | 0 | --      | --  | --      |     |
| 2656738 | EIF4A2     | NM_001967    | 55.673171 | 0.554868077 | 0.8973606 | 0 | 4.0E-03 | 1.2 | 6.0E-05 |     |
| 2523540 | CYP20A1    | NM_177538    | 60.622386 | 0.553386949 | 0.8635833 | 0 | --      | --  | --      |     |
| 3010082 | PHTF2      | NM_020432    | 56.596436 | 0.548900027 | 0.8716859 | 0 | 2.0E-01 | 1.3 | 5.0E-08 |     |
| 2966371 | CCNC       | NM_001013399 | 76.261211 | 0.547439136 | 0.8923279 | 0 | --      | --  | --      |     |
| 2594569 | ORC2L      | NM_006190    | 56.784496 | 0.543927912 | 0.8659007 | 0 | 4.4E-02 | 1.5 | 3.4E-05 |     |
| 2331771 | RLF        | NM_012421    | 52.128941 | 0.538095543 | 0.8884195 | 0 | --      | --  | --      |     |
| 2978050 | SHPRH      | NM_173082    | 52.495629 | 0.537338831 | 0.8783188 | 0 | --      | --  | --      |     |
| 2553911 | KIAA1387   | NM_020463    | 54.840826 | 0.53670888  | 0.8643032 | 0 | 8.2E-02 | 1.3 | 3.7E-08 |     |
| 2454935 | LOC90806   | NM_144567    | 56.228456 | 0.533275111 | 0.8827958 | 0 | 3.6E-01 | 1.4 | 1.1E-06 |     |
| 2653902 | ZNF639     | NM_016331    | 52.048273 | 0.530777173 | 0.8831382 | 0 | --      | --  | --      |     |
| 2819044 | RASA1      | NM_002890    | 55.772067 | 0.528296423 | 0.8826892 | 0 | --      | --  | --      |     |
| 3067592 | LOC440506  | XM_498709    | 79.587086 | 0.5269908   | 0.8668533 | 0 | 1.0E+00 | 1.3 | 9.2E-04 |     |
| 2339414 | USP1       | NM_001017416 | 61.558416 | 0.525438159 | 0.856716  | 0 | 6.7E-03 | 1.5 | 1.3E-03 |     |
| 2889698 | CLK4       | NM_020666    | 67.3196   | 0.524381041 | 0.8659399 | 0 | --      | --  | --      |     |
| 2761734 | FBXL5      | NM_033535    | 57.137878 | 0.52406043  | 0.888748  | 0 | --      | --  | --      |     |
| 2412834 | ZCCHC11    | NM_001009882 | 51.873053 | 0.523749982 | 0.8831802 | 0 | --      | --  | --      |     |
| 3047963 | PSMA2      | NM_002787    | 58.807824 | 0.523359212 | 0.8804129 | 0 | --      | --  | --      |     |
| 2867145 | LOC342096  | XM_292357    | 53.472709 | 0.523059062 | 0.8618801 | 0 | 1.0E-02 | 1.4 | 4.4E-04 |     |
| 2834093 | TCERG1     | NM_006706    | 49.683831 | 0.522992836 | 0.8853053 | 0 | 9.2E-03 | 1.3 | 1.8E-05 |     |
| 2823326 | FER        | NM_005246    | 76.657781 | 0.522582748 | 0.8616043 | 0 | --      | --  | --      |     |
| 2826550 | LOC391827  | XM_498018    | 51.870977 | 0.522306939 | 0.8697981 | 0 | 6.3E-01 | 1.2 | 5.0E-06 |     |
| 2916246 | C6orf162   | NM_020425    | 52.225945 | 0.521938905 | 0.8927413 | 0 | --      | --  | --      |     |
| 3061191 | PEX1       | NM_000466    | 47.448402 | 0.521912597 | 0.8951971 | 0 | --      | --  | --      |     |
| 2757720 | C4orf15    | NM_024511    | 55.953192 | 0.520683967 | 0.8920252 | 0 | --      | --  | --      |     |
| 2350840 | GNAI3      | NM_006496    | 57.729282 | 0.51833837  | 0.8796174 | 0 | 8.8E-01 | 1.4 | 6.1E-19 |     |
| 2370991 | DHX9       | NM_001357    | 49.668266 | 0.516872799 | 0.8676171 | 0 | 8.8E-01 | 1.2 | 1.3E-03 |     |
| 2476176 | YIPF4      | NM_032312    | 57.776942 | 0.514697085 | 0.8872266 | 0 | --      | --  | --      |     |
| 2625793 | LOC440958  | XM_498933    | 55.50326  | 0.513351298 | 0.8863709 | 0 | 1.0E+00 | 1.1 | 2.1E-07 |     |
| 2509832 | EPC2       | NM_015630    | 56.85444  | 0.512735124 | 0.860461  | 0 | 3.8E-03 | 1.3 | 2.4E-04 |     |
| 2659887 | FYTTD1     | NM_032288    | 78.007235 | 0.511336948 | 0.8587068 | 0 | --      | --  | --      |     |
| 2701927 | SLC33A1    | NM_004733    | 55.839477 | 0.511081996 | 0.8857004 | 0 | --      | --  | --      |     |
| 2591942 | ORMDL1     | NM_016467    | 76.823092 | 0.510398036 | 0.870126  | 0 | --      | --  | --      |     |
| 2672532 | HYPB       | NM_014159    | 49.170404 | 0.506499245 | 0.8663246 | 0 | 1.7E-01 | 1.3 | 1.9E-03 |     |
| 2540477 | ROCK2      | NM_004850    | 55.546673 | 0.506202283 | 0.8751327 | 0 | --      | --  | --      |     |
| 2500722 | ZC3H6      | NM_198581    | 54.610147 | 0.501986553 | 0.8471212 | 0 | --      | --  | --      |     |
| 2763805 | DHX15      | NM_001358    | 54.667506 | 0.501704675 | 0.8569693 | 0 | 3.2E-01 | 1.2 | 2.8E-06 | Yes |
| 3009959 | PTPN12     | NM_002835    | 48.275325 | 0.500439384 | 0.8765276 | 0 | 1.4E-01 | 1.2 | 3.4E-06 |     |
| 3011250 | DMTF1      | NM_021145    | 61.048882 | 0.499284932 | 0.8584241 | 0 | 1.0E+00 | 1.1 | 1.1E-03 | Yes |
| 2808290 | ZNF131     | AK057343     | 51.157787 | 0.498819249 | 0.8609393 | 0 | 8.8E-04 | 1.3 | 1.3E-01 |     |
| 2811745 | IPO11      | NM_016338    | 83.147998 | 0.498402272 | 0.8716236 | 0 | --      | --  | --      |     |
| 2620160 | ZNF197     | NM_006991    | 52.238231 | 0.495892321 | 0.8748735 | 0 | --      | --  | --      |     |
| 2780734 | MGC16169   | NM_033115    | 55.934421 | 0.494326725 | 0.8658629 | 0 | --      | --  | --      |     |
| 2825514 | DMXL1      | NM_005509    | 67.413849 | 0.493672779 | 0.8069483 | 0 | 1.0E+00 | 1.2 | 8.6E-04 |     |
| 2345617 | PKN2       | NM_006256    | 56.17971  | 0.49272206  | 0.849124  | 0 | 8.2E-01 | 1.2 | 6.8E-14 |     |
| 2346074 | ZNF326     | NM_182976    | 71.384945 | 0.491062955 | 0.8681872 | 0 | --      | --  | --      |     |
| 2968054 | SEC63      | NM_007214    | 46.275184 | 0.48849763  | 0.8652032 | 0 | 1.2E-01 | 1.4 | 4.9E-05 |     |
| 3020444 | CAPZA2     | NM_006136    | 53.186898 | 0.487997764 | 0.8715645 | 0 | 7.0E-01 | 1.3 | 1.6E-03 |     |
| 2815139 | DULLARD    | NM_015343    | 62.543329 | 0.485592154 | 0.856535  | 0 | 9.0E-05 | 1.5 | 4.8E-04 |     |
| 2645579 | RASA2      | NM_006506    | 56.002861 | 0.485161888 | 0.870205  | 0 | --      | --  | --      |     |
| 2372967 | CDC73      | NM_024529    | 45.897956 | 0.483774383 | 0.8617684 | 0 | 4.0E-01 | 1.2 | 2.4E-12 |     |
| 2546008 | SUPT7L     | NM_014860    | 53.547005 | 0.482444228 | 0.8802432 | 0 | --      | --  | --      |     |
| 3104323 | CGI-62     | NM_016010    | 55.389814 | 0.481303404 | 0.8325106 | 0 | 5.5E-04 | 1.5 | 2.0E-02 |     |
| 2859734 | TRIM23     | NM_033228    | 56.51714  | 0.481016935 | 0.8489832 | 0 | 4.3E-01 | 1.3 | 9.1E-08 |     |
| 2519140 | LEREPO4    | NM_018471    | 67.938518 | 0.480547882 | 0.8715304 | 0 | --      | --  | --      |     |
| 2871717 | MGC39633   | NM_152549    | 54.855774 | 0.479660719 | 0.8595288 | 0 | 1.3E-02 | 1.5 | 2.1E-05 |     |
| 2549260 | MAP4K3     | NM_003618    | 71.087149 | 0.479440516 | 0.8436046 | 0 | --      | --  | --      |     |

|         |           |              |           |             |           |   |         |     |         |     |
|---------|-----------|--------------|-----------|-------------|-----------|---|---------|-----|---------|-----|
| 2908572 | CDC5L     | NM_001253    | 48.160975 | 0.479284213 | 0.8718207 | 0 | 1.7E-02 | 1.5 | 7.3E-06 | Yes |
| 2812120 | SDCCAG10  | NM_005869    | 55.083681 | 0.47906576  | 0.8817622 | 0 | --      | --  | --      |     |
| 2817386 | PAPD4     | NM_173797    | 48.361771 | 0.478931867 | 0.8798146 | 0 | 2.3E-01 | 1.3 | 9.3E-04 |     |
| 2713950 | ZNF141    | NM_003441    | 47.313714 | 0.478832272 | 0.8679478 | 0 | --      | --  | --      |     |
| 2430370 | GDAP2     | NM_017686    | 53.095514 | 0.478683847 | 0.8789808 | 0 | --      | --  | --      |     |
| 2541944 | SMC6L1    | NM_024624    | 87.066024 | 0.478626879 | 0.8481223 | 0 | --      | --  | --      |     |
| 2807000 | WDR70     | NM_018034    | 46.812557 | 0.47839952  | 0.8626861 | 0 | --      | --  | --      |     |
| 2911944 | PHF3      | NM_015153    | 50.23312  | 0.475784307 | 0.8363271 | 0 | --      | --  | --      |     |
| 2514516 | KLHL23    | NM_144711    | 51.581672 | 0.473734931 | 0.8657433 | 0 | --      | --  | --      |     |
| 2423597 | ERBP      | NM_014597    | 47.80533  | 0.472219273 | 0.8726994 | 0 | --      | --  | --      |     |
| 2475209 | PPP1CB    | NM_206876    | 57.215922 | 0.469017772 | 0.8690075 | 0 | --      | --  | --      |     |
| 2974469 | STX7      | NM_003569    | 66.97464  | 0.464181601 | 0.8357754 | 0 | --      | --  | --      |     |
| 2772614 | GRSF1     | NM_002092    | 48.72883  | 0.462807154 | 0.8717172 | 0 | --      | --  | --      | Yes |
| 2693217 | OSBPL11   | NM_022776    | 53.314965 | 0.462801377 | 0.8681586 | 0 | --      | --  | --      |     |
| 2566764 | REV1L     | NM_016316    | 55.593607 | 0.462242992 | 0.8595654 | 0 | 7.5E-03 | 1.3 | 1.0E-03 |     |
| 2868283 | RIOK2     | NM_018343    | 49.831875 | 0.46219821  | 0.8691866 | 0 | --      | --  | --      |     |
| 3087813 | PCM1      | NM_006197    | 75.410543 | 0.461279464 | 0.8465711 | 0 | 9.9E-01 | 1.3 | 2.6E-06 |     |
| 2695941 | TOPBP1    | NM_007027    | 45.43705  | 0.45997574  | 0.8616557 | 0 | 1.8E-01 | 1.2 | 1.1E-03 |     |
| 2546285 | FLJ20628  | NM_017910    | 49.144613 | 0.458797955 | 0.885094  | 0 | 9.2E-01 | 1.2 | 5.5E-05 |     |
| 2518743 | NUP35     | NM_001008544 | 46.66214  | 0.458248589 | 0.8532959 | 0 | --      | --  | --      |     |
| 2558511 | TIA1      | NM_022173    | 51.866838 | 0.457538503 | 0.8390242 | 0 | --      | --  | --      |     |
| 2812315 | FLJ13611  | NM_024941    | 52.72119  | 0.456929828 | 0.8743285 | 0 | --      | --  | --      |     |
| 2353881 | LOC441899 | XM_497699    | 74.788186 | 0.456913003 | 0.8324311 | 0 | --      | --  | --      |     |
| 2550790 | LRPPRC    | NM_133259    | 59.334182 | 0.456823182 | 0.8486523 | 0 | --      | --  | --      |     |
| 2743085 | LARP2     | NM_032239    | 58.996353 | 0.454287828 | 0.8375496 | 0 | 2.9E-01 | 1.3 | 7.6E-05 |     |
| 2367537 | C1orf9    | NM_016227    | 46.652075 | 0.453708798 | 0.8482573 | 0 | --      | --  | --      |     |
| 2539607 | OACT2     | NM_138799    | 43.48799  | 0.450870163 | 0.8614953 | 0 | --      | --  | --      |     |
| 2555277 | USP34     | NM_014709    | 46.772058 | 0.450190729 | 0.8006611 | 0 | 2.1E-01 | 1.3 | 8.0E-06 |     |
| 2516332 | SCRN3     | NM_024583    | 71.065004 | 0.448239611 | 0.8573193 | 0 | --      | --  | --      |     |
| 2945645 | TTRAP     | NM_016614    | 43.473989 | 0.447806609 | 0.8535956 | 0 | --      | --  | --      |     |
| 2768981 | SGCB      | NM_000232    | 55.975707 | 0.447355792 | 0.8676699 | 0 | --      | --  | --      |     |
| 2417737 | LRRC40    | NM_017768    | 57.439041 | 0.447130031 | 0.8313755 | 0 | --      | --  | --      |     |
| 2739755 | C4orf16   | NM_018569    | 53.460783 | 0.446610212 | 0.8495944 | 0 | 5.8E-03 | 1.9 | 8.8E-05 |     |
| 2580635 | C2orf25   | NM_015702    | 51.394572 | 0.44619354  | 0.8493859 | 0 | --      | --  | --      |     |
| 2974188 | CRSP3     | NM_004830    | 40.533792 | 0.445198659 | 0.8693754 | 0 | 6.3E-01 | 1.2 | 2.0E-04 |     |
| 2329752 | ZNF262    | NM_005095    | 46.174571 | 0.44507702  | 0.8429612 | 0 | 1.0E+00 | 1.1 | 1.3E-04 |     |
| 2340845 | MIER1     | NM_020948    | 50.056511 | 0.443879456 | 0.8424526 | 0 | 1.0E+00 | 1.1 | 9.4E-12 |     |
| 2502300 | DDX18     | NM_006773    | 51.81735  | 0.443726976 | 0.8691085 | 0 | 4.2E-01 | 1.2 | 1.1E-04 |     |
| 2828564 | RAD50     | NM_005732    | 48.324208 | 0.441272011 | 0.8435966 | 0 | 5.2E-04 | 1.6 | 2.3E-04 |     |
| 3092663 | WRN       | NM_000553    | 46.810118 | 0.440798733 | 0.8527136 | 0 | 8.5E-02 | 1.3 | 6.8E-06 |     |
| 2422517 | ZNF644    | NM_201269    | 45.176387 | 0.438576864 | 0.8393166 | 0 | 1.8E-02 | 1.4 | 9.4E-05 |     |
| 2681157 | TMF1      | NM_007114    | 51.644805 | 0.438556136 | 0.8439788 | 0 | 1.0E+00 | 1.2 | 2.2E-03 |     |
| 2904877 | MAPK14    | NM_139014    | 45.970552 | 0.437209124 | 0.8672514 | 0 | --      | --  | --      |     |
| 2915268 | KIAA1117  | NM_015018    | 43.236302 | 0.436981119 | 0.8516654 | 0 | 1.0E+00 | 1.2 | 1.8E-03 |     |
| 2429277 | CSDE1     | NM_001007553 | 43.297195 | 0.435577617 | 0.8386733 | 0 | --      | --  | --      |     |
| 2654306 | TTC14     | NM_133462    | 50.783278 | 0.435283252 | 0.846602  | 0 | --      | --  | --      |     |
| 2857733 | FLJ35954  | NM_152622    | 45.601901 | 0.428458012 | 0.8637224 | 0 | --      | --  | --      |     |
| 3074362 | CNOT4     | NM_013316    | 46.98878  | 0.426763893 | 0.8628626 | 0 | --      | --  | --      |     |
| 2475628 | YPEL5     | NM_016061    | 52.89051  | 0.425885048 | 0.8594489 | 0 | --      | --  | --      |     |
| 2575054 | WDR33     | NM_018383    | 41.06937  | 0.42577714  | 0.8647792 | 0 | --      | --  | --      |     |
| 2507209 | CCNT2     | NM_001241    | 41.574575 | 0.423576433 | 0.8491035 | 0 | --      | --  | --      |     |
| 2548970 | SFRS7     | NM_006276    | 41.857765 | 0.422765011 | 0.8257239 | 0 | 3.4E-02 | 1.3 | 7.2E-09 | Yes |
| 2463864 | KIAA0470L | XM_496715    | 56.600946 | 0.422575828 | 0.8284956 | 0 | 6.1E-08 | 1.8 | 4.2E-08 |     |
| 2964771 | MAP3K7    | NM_145333    | 50.854315 | 0.421364136 | 0.8680722 | 0 | --      | --  | --      |     |
| 2488078 | MPHOSPH10 | NM_005791    | 41.014581 | 0.420698227 | 0.8568615 | 0 | 5.9E-03 | 1.4 | 1.3E-06 | Yes |
| 3060917 | MTERF     | NM_006980    | 43.080268 | 0.419708113 | 0.8785086 | 0 | --      | --  | --      |     |
| 2853768 | NUP155    | NM_153485    | 45.564225 | 0.418215294 | 0.8511407 | 0 | 1.0E+00 | 1.2 | 4.4E-07 |     |
| 2519981 | PMS1      | NM_000534    | 48.460167 | 0.416670425 | 0.8448149 | 0 | --      | --  | --      |     |
| 2502424 | INSIG2    | NM_016133    | 70.131565 | 0.415032154 | 0.8502979 | 0 | --      | --  | --      |     |
| 2854241 | AVO3      | NM_152756    | 40.460834 | 0.413903252 | 0.8302945 | 0 | --      | --  | --      |     |
| 2352501 | LRIG2     | NM_014813    | 41.754596 | 0.413774838 | 0.8531315 | 0 | 1.7E-01 | 1.3 | 3.6E-05 |     |
| 2484422 | PEX13     | NM_002618    | 50.178993 | 0.413591535 | 0.8626163 | 0 | --      | --  | --      |     |
| 2339740 | KIAA1799  | NM_032437    | 44.331228 | 0.413489575 | 0.8521411 | 0 | --      | --  | --      |     |
| 2790570 | PLRG1     | NM_002669    | 46.792906 | 0.411652556 | 0.8591902 | 0 | --      | --  | --      | Yes |
| 2553282 | PSME4     | NM_014614    | 39.832713 | 0.411162969 | 0.8535295 | 0 | --      | --  | --      |     |
| 2420229 | TTLL7     | NM_024686    | 57.815061 | 0.409514975 | 0.8210894 | 0 | 4.9E-04 | 1.7 | 2.2E-04 |     |
| 2644461 | ARMC8     | NM_213654    | 55.936699 | 0.406174946 | 0.8549233 | 0 | --      | --  | --      |     |
| 2971378 | GOPC      | NM_020399    | 51.758458 | 0.406056941 | 0.8606819 | 0 | --      | --  | --      |     |
| 2401275 | HNRPR     | NM_005826    | 38.632933 | 0.404498109 | 0.8354859 | 0 | 1.6E-02 | 1.5 | 3.6E-05 | Yes |
| 3017547 | MLL5      | NM_018682    | 43.803628 | 0.404313463 | 0.821638  | 0 | 3.9E-03 | 1.3 | 9.6E-08 |     |
| 2728224 | SRP72     | NM_006947    | 56.895879 | 0.404300356 | 0.855728  | 0 | --      | --  | --      |     |
| 2647742 | eIF2A     | NM_032025    | 42.309802 | 0.403541977 | 0.8392755 | 0 | --      | --  | --      |     |
| 2743029 | FLJ21106  | NM_025097    | 43.15515  | 0.403139348 | 0.8525798 | 0 | 1.0E+00 | 1.2 | 1.3E-03 |     |
| 3020804 | LSM8      | NM_016200    | 52.235587 | 0.40155484  | 0.8430929 | 0 | --      | --  | --      | Yes |
| 2880361 | KIAA0555  | NM_014790    | 55.091523 | 0.401338862 | 0.7837374 | 0 | 3.3E-01 | 1.3 | 6.8E-06 |     |
| 2892738 | PRPF4B    | NM_176800    | 58.046705 | 0.401207913 | 0.8341026 | 0 | 7.3E-01 | 1.1 | 9.2E-04 | Yes |
| 2688759 | APG3L     | NM_022488    | 47.535765 | 0.401196772 | 0.8671071 | 0 | --      | --  | --      |     |
| 2664288 | MGC24132  | NM_152396    | 49.198526 | 0.400235244 | 0.8676189 | 0 | --      | --  | --      |     |
| 2366490 | BLZF1     | NM_003666    | 55.79034  | 0.39950724  | 0.8424448 | 0 | --      | --  | --      |     |
| 2697331 | DBR1      | NM_016216    | 38.938914 | 0.399086113 | 0.835384  | 0 | --      | --  | --      | Yes |
| 2775756 | SEC31L1   | NM_016211    | 47.054003 | 0.395894512 | 0.8247858 | 0 | 2.7E-03 | 1.3 | 6.3E-08 |     |

|         |           |              |           |             |            |          |         |     |         |     |
|---------|-----------|--------------|-----------|-------------|------------|----------|---------|-----|---------|-----|
| 2517549 | DRB1      | NM_152945    | 45.961632 | 0.39573651  | 0.8619382  | 0        | --      | --  | --      |     |
| 2894663 | PAK11P1   | NM_017906    | 38.527056 | 0.394441239 | 0.8559995  | 0        | --      | --  | --      |     |
| 2686371 | TOMM70A   | NM_014820    | 53.276173 | 0.394030815 | 0.8249993  | 0        | 2.6E-01 | 1.3 | 2.1E-03 |     |
| 2773997 | NUP54     | NM_017426    | 40.831085 | 0.393420934 | 0.8204489  | 0        | --      | --  | --      |     |
| 3012819 | FLJ20097  | NM_017667    | 53.845048 | 0.392814159 | 0.8521586  | 0        | --      | --  | --      |     |
| 2349043 | SLC30A7   | NM_133496    | 40.643541 | 0.388694366 | 0.8647219  | 0        | 5.8E-02 | 1.4 | 2.2E-06 |     |
| 2813524 | RAD17     | NM_133339    | 41.990971 | 0.388245922 | 0.8580737  | 0        | --      | --  | --      |     |
| 2387006 | MTR       | NM_000254    | 44.968288 | 0.387612039 | 0.8432212  | 0        | 6.6E-03 | 1.3 | 6.7E-05 |     |
| 2752243 | KIAA1712  | NM_030633    | 47.927461 | 0.387162838 | 0.8328556  | 0        | --      | --  | --      |     |
| 3642707 | C16orf9   | NM_032039    | 44.46733  | 0.385617707 | -0.8525601 | 1.57E-26 | 1.3E-03 | 1.1 | 4.0E-01 |     |
| 2553970 | PNPT1     | NM_033109    | 76.043157 | 0.385459559 | 0.8404918  | 0        | --      | --  | --      | Yes |
| 2775562 | HNRPDL    | NM_005463    | 39.280958 | 0.385351119 | 0.8326886  | 0        | --      | --  | --      | Yes |
| 2488785 | ALMS1     | NM_015120    | 36.712401 | 0.384861331 | 0.8431624  | 0        | 3.9E-01 | 1.3 | 4.6E-08 |     |
| 2824354 | DCP2      | NM_152624    | 39.478387 | 0.384086287 | 0.8584695  | 0        | --      | --  | --      | Yes |
| 3012381 | AKAP9     | NM_147185    | 42.529361 | 0.383921343 | 0.8149729  | 0        | 2.4E-01 | 1.2 | 4.3E-05 |     |
| 2998333 | C7orf36   | NM_020192    | 47.410683 | 0.382523926 | 0.8626402  | 0        | --      | --  | --      |     |
| 2571979 | SLC35F5   | NM_025181    | 47.400851 | 0.379632906 | 0.8418117  | 0        | --      | --  | --      |     |
| 2713789 | ZNF595    | NM_182524    | 36.265861 | 0.378392284 | 0.8311234  | 0        | --      | --  | --      |     |
| 2371738 | C1orf26   | NM_017673    | 56.084014 | 0.376526269 | 0.8186373  | 0        | 2.7E-05 | 1.6 | 5.0E-08 |     |
| 2427688 | C1orf103  | NM_001006945 | 45.970087 | 0.374557349 | 0.8488485  | 0        | --      | --  | --      |     |
| 3088405 | C8orf35   | NM_018142    | 43.406747 | 0.374556255 | 0.8357718  | 0        | 3.1E-03 | 1.5 | 1.2E-03 | Yes |
| 2653932 | LOC441511 | XM_497141    | 50.0399   | 0.373652258 | 0.8419955  | 0        | --      | --  | --      |     |
| 2747893 | ARFIP1    | NM_014447    | 41.900698 | 0.373317859 | 0.8431866  | 0        | 7.9E-01 | 1.1 | 2.7E-05 |     |
| 2726323 | KIAA1458  | XM_044434    | 47.591252 | 0.372182707 | 0.8231712  | 0        | 2.1E-04 | 1.5 | 7.7E-02 |     |
| 2530539 | C2orf33   | NM_020194    | 45.232455 | 0.371612061 | 0.8588096  | 0        | --      | --  | --      |     |
| 2580304 | ORC4L     | NM_181741    | 37.221872 | 0.36805758  | 0.8421208  | 0        | --      | --  | --      |     |
| 2624074 | GNL3      | NM_206825    | 38.225178 | 0.366347325 | 0.8244346  | 0        | --      | --  | --      |     |
| 2491935 | FLJ20758  | NM_017952    | 46.669191 | 0.36580922  | 0.8198377  | 0        | 3.4E-01 | 1.2 | 7.0E-05 |     |
| 2829488 | DDX46     | NM_014829    | 35.454779 | 0.365605823 | 0.8545604  | 0        | --      | --  | --      | Yes |
| 2746164 | MMAA      | NM_172250    | 39.349199 | 0.365070387 | 0.8599861  | 0        | --      | --  | --      |     |
| 2836451 | MFAP3     | NM_005927    | 39.230266 | 0.364631322 | 0.8197837  | 0        | 1.7E-01 | 1.4 | 1.2E-04 |     |
| 2696802 | STAG1     | NM_005862    | 44.264171 | 0.364624778 | 0.7968368  | 0        | 4.1E-02 | 1.4 | 1.6E-07 |     |
| 2812273 | PPWD1     | NM_015342    | 51.598437 | 0.364101889 | 0.8324851  | 0        | --      | --  | --      | Yes |
| 2562867 | RNF103    | NM_005667    | 39.097904 | 0.363853773 | 0.8402453  | 0        | --      | --  | --      |     |
| 2454532 | C1orf73   | NM_015434    | 44.651103 | 0.360763205 | 0.8098356  | 0        | 1.0E-03 | 1.5 | 1.4E-05 | Yes |
| 2678116 | FLJ34969  | NM_152678    | 36.88809  | 0.360320257 | 0.8402713  | 0        | --      | --  | --      |     |
| 2614120 | LOC136321 | XM_069842    | 35.972742 | 0.35925117  | 0.8438529  | 0        | --      | --  | --      |     |
| 2473784 | SELI      | NM_033505    | 51.368486 | 0.357866643 | 0.764234   | 0        | --      | --  | --      |     |
| 2348792 | FLJ10287  | NM_019083    | 42.670133 | 0.356764195 | 0.8169619  | 0        | 6.5E-02 | 1.2 | 1.5E-04 |     |
| 2378256 | SYT14     | NM_153262    | 40.023974 | 0.35591375  | 0.834351   | 0        | --      | --  | --      |     |
| 2943808 | NUP153    | NM_005124    | 39.621727 | 0.353240852 | 0.8448064  | 0        | --      | --  | --      |     |
| 2702307 | CCNL1     | NM_020307    | 35.077669 | 0.353077429 | 0.8166547  | 0        | 2.9E-02 | 1.4 | 2.1E-06 |     |
| 2660648 | CRBN      | NM_016302    | 35.775536 | 0.352646479 | 0.8384502  | 0        | --      | --  | --      |     |
| 2344542 | BXDC5     | NM_025065    | 33.44053  | 0.351229415 | 0.8379837  | 0        | --      | --  | --      | Yes |
| 2548776 | ARL6IP2   | NM_022374    | 38.988243 | 0.350717812 | 0.8232554  | 0        | 3.7E-02 | 1.2 | 1.1E-05 |     |
| 3044904 | KBTBD2    | NM_015483    | 40.203992 | 0.350341827 | 0.8365837  | 0        | --      | --  | --      |     |
| 2634027 | LRRIG2    | NM_024548    | 34.047022 | 0.350237507 | 0.815729   | 0        | 9.0E-02 | 1.2 | 4.9E-05 |     |
| 3229628 | BTBD14A   | NM_144653    | 46.171176 | 0.347670197 | -0.8519139 | 1.88E-26 | 3.2E-14 | 1.5 | 4.4E-02 |     |
| 2704894 | PHC3      | NM_024947    | 35.012704 | 0.347358983 | 0.828074   | 0        | --      | --  | --      |     |
| 2447824 | C1orf22   | NM_025191    | 49.714181 | 0.346033762 | 0.7254859  | 4.44E-16 | --      | --  | --      |     |
| 2766456 | UGDH      | NM_003359    | 54.930888 | 0.345891598 | 0.8466864  | 0        | --      | --  | --      |     |
| 2465493 | ZNF670    | NM_033213    | 41.857758 | 0.343686773 | 0.8346064  | 0        | 8.4E-04 | 1.3 | 2.8E-03 |     |
| 2923819 | HSF2      | NM_004506    | 34.163537 | 0.342898989 | 0.8478864  | 0        | 8.9E-03 | 1.5 | 2.3E-03 |     |
| 2586845 | SLC25A12  | NM_003705    | 46.864954 | 0.339379994 | 0.8008453  | 0        | --      | --  | --      |     |
| 2514658 | ZNF650    | NM_172070    | 51.051717 | 0.33840199  | 0.7812355  | 0        | --      | --  | --      |     |
| 2428313 | ST7L      | NM_138727    | 32.269059 | 0.337914939 | 0.8426167  | 0        | --      | --  | --      |     |
| 2772017 | YT521     | NM_133370    | 37.045533 | 0.337755913 | 0.8177167  | 0        | --      | --  | --      |     |
| 2581548 | FNBP3     | XM_371575    | 35.483143 | 0.33604159  | 0.8154622  | 0        | --      | --  | --      |     |
| 2870397 | PJA2      | NM_014819    | 52.806009 | 0.335921394 | 0.7546046  | 0        | --      | --  | --      |     |
| 2785035 | MGC33302  | NM_152778    | 31.536858 | 0.335608219 | 0.8339568  | 0        | 1.5E-01 | 1.3 | 3.2E-05 |     |
| 2761285 | KIAA1327  | AB037748     | 58.465065 | 0.333968318 | 0.8071823  | 0        | --      | --  | --      |     |
| 3067080 | COG5      | NM_006348    | 34.837309 | 0.333492661 | 0.8259931  | 0        | 1.9E-02 | 1.3 | 9.5E-08 |     |
| 2923359 | ASF1A     | NM_014034    | 36.445015 | 0.333067762 | 0.8282152  | 0        | --      | --  | --      |     |
| 2616018 | LOC131405 | XM_067369    | 31.33623  | 0.33295325  | 0.8158548  | 0        | --      | --  | --      |     |
| 3020496 | ST7       | NM_018412    | 37.869733 | 0.332913709 | 0.8176998  | 0        | 4.6E-04 | 1.4 | 5.3E-22 |     |
| 3018535 | BCAP29    | NM_001008406 | 43.98023  | 0.329796434 | 0.8098197  | 0        | 4.9E-05 | 1.9 | 4.5E-02 |     |
| 2854718 | OSRF      | NM_012382    | 38.20597  | 0.329219235 | 0.8218577  | 0        | 4.6E-02 | 1.4 | 7.8E-04 |     |
| 2832447 | PCDHB13   | NM_018933    | 34.190016 | 0.329075231 | 0.8370582  | 0        | 6.2E-02 | 1.4 | 1.8E-03 |     |
| 2421782 | KAT3      | NM_001008661 | 54.21933  | 0.328579763 | 0.8180169  | 0        | 1.0E+00 | 1.1 | 7.4E-09 |     |
| 2971139 | C6orf113  | NM_145062    | 34.959207 | 0.328463335 | 0.8379811  | 0        | --      | --  | --      |     |
| 3040073 | SNX13     | NM_015132    | 44.050218 | 0.327985853 | 0.809965   | 0        | --      | --  | --      |     |
| 2586227 | FLJ21901  | NM_024622    | 35.845052 | 0.325515588 | 0.8429826  | 0        | --      | --  | --      |     |
| 2609560 | THUMPD3   | NM_015453    | 37.378334 | 0.323747909 | 0.8465135  | 0        | --      | --  | --      |     |
| 2893847 | C6orf151  | NM_152551    | 47.879733 | 0.32361991  | 0.8260088  | 0        | --      | --  | --      | Yes |
| 3116535 | PHF20L1   | NM_016018    | 40.42383  | 0.322584652 | 0.8088072  | 0        | 1.5E-03 | 1.6 | 1.7E-21 |     |
| 3039731 | ANKMY2    | NM_020319    | 34.436712 | 0.321720376 | 0.8340254  | 0        | --      | --  | --      |     |
| 2396009 | LZIC      | NM_032368    | 35.523356 | 0.32119241  | 0.8288558  | 0        | --      | --  | --      |     |
| 2549092 | SOS1      | NM_005633    | 36.598161 | 0.321043159 | 0.7828947  | 0        | --      | --  | --      |     |
| 2336302 | ZFYVE9    | NM_004799    | 55.879797 | 0.320884415 | 0.7810489  | 0        | --      | --  | --      |     |
| 2653840 | PIK3CA    | NM_006218    | 40.807474 | 0.319568382 | 0.775912   | 0        | 2.1E-04 | 1.5 | 3.8E-06 |     |
| 2593352 | GTF3C3    | NM_012086    | 40.144489 | 0.318868104 | 0.805619   | 0        | --      | --  | --      |     |

|         |            |              |           |             |            |          |         |     |    |         |  |     |
|---------|------------|--------------|-----------|-------------|------------|----------|---------|-----|----|---------|--|-----|
| 2975680 | BCLAF1     | NM_014739    | 38.745708 | 0.318622867 | 0.8250026  | 0        | --      | --  | -- |         |  |     |
| 2414998 | MYSM1      | XM_055481    | 42.345079 | 0.318311311 | 0.7669019  | 0        | --      | --  | -- |         |  |     |
| 2425447 | DPH5       | NM_015958    | 31.087331 | 0.318051979 | 0.7985156  | 0        | --      | --  | -- |         |  |     |
| 2521500 | PREI3      | NM_015387    | 40.750101 | 0.316484091 | 0.8092255  | 0        | --      | --  | -- |         |  |     |
| 2736259 | SMARCAD1   | NM_020159    | 33.190181 | 0.315637901 | 0.7909435  | 0        | --      | --  | -- |         |  |     |
| 2776026 | HEL308     | NM_133636    | 30.951635 | 0.314444054 | 0.8389167  | 0        | --      | --  | -- |         |  |     |
| 2664452 | ANKRD28    | NM_015199    | 31.803012 | 0.313647419 | 0.8055508  | 0        | --      | --  | -- |         |  |     |
| 3085065 | TIGD1      | NM_145702    | 32.173795 | 0.312640052 | 0.8430818  | 0        | --      | --  | -- |         |  |     |
| 2476411 | FLJ20272   | NM_017735    | 41.685101 | 0.312186185 | 0.8260866  | 0        | 1.0E+00 | 1.1 |    | 5.7E-04 |  |     |
| 2507495 | UBXD2      | NM_014607    | 77.196985 | 0.312127404 | 0.801856   | 0        | --      | --  | -- |         |  |     |
| 2468920 | CPSF3      | NM_016207    | 32.825107 | 0.309951882 | 0.7654616  | 0        | --      | --  | -- |         |  | Yes |
| 2346399 | CDC7       | NM_003503    | 34.12504  | 0.309844688 | 0.8234843  | 0        | --      | --  | -- |         |  |     |
| 3111695 | EBAG9      | NM_004215    | 32.568353 | 0.309605308 | 0.8363     | 0        | --      | --  | -- |         |  |     |
| 2866543 | CETN3      | NM_004365    | 37.781174 | 0.309349493 | 0.8355876  | 0        | --      | --  | -- |         |  |     |
| 2929036 | C6orf93    | NM_032860    | 36.52639  | 0.30924679  | 0.8358478  | 0        | --      | --  | -- |         |  |     |
| 2811656 | KIF2       | NM_004520    | 38.603169 | 0.30847342  | 0.7398472  | 0        | --      | --  | -- |         |  |     |
| 3065963 | ORC5L      | NM_181747    | 38.546841 | 0.308317199 | 0.7952471  | 0        | --      | --  | -- |         |  |     |
| 2473571 | RAB10      | NM_016131    | 72.755707 | 0.308269584 | 0.7859377  | 0        | --      | --  | -- |         |  |     |
| 2786462 | ELF2       | NM_201999    | 38.5305   | 0.306510689 | 0.7904981  | 0        | 1.5E-04 | 1.6 |    | 1.9E-24 |  |     |
| 2523213 | BMPR2      | NM_033346    | 41.922963 | 0.305196451 | 0.7369563  | 0        | --      | --  | -- |         |  |     |
| 2382336 | FBXO28     | NM_015176    | 28.505335 | 0.304491486 | 0.8425952  | 0        | --      | --  | -- |         |  |     |
| 2387711 | LOC128136  | XM_497739    | 36.522319 | 0.302886887 | 0.7857301  | 0        | 1.3E-02 | 1.7 |    | 2.9E-05 |  |     |
| 2443575 | KIFAP3     | NM_014970    | 40.507723 | 0.301825563 | 0.780608   | 0        | --      | --  | -- |         |  |     |
| 2437753 | KIAA0907   | NM_014949    | 32.741217 | 0.299998884 | 0.8102642  | 0        | --      | --  | -- |         |  |     |
| 2962525 | IBTK       | NM_015525    | 64.34763  | 0.299211078 | 0.7784163  | 0        | --      | --  | -- |         |  |     |
| 2417095 | SLC35D1    | NM_015139    | 49.742977 | 0.298059634 | 0.8176416  | 0        | --      | --  | -- |         |  |     |
| 2706297 | TBL1XR1    | NM_024665    | 29.981691 | 0.297395716 | 0.7890577  | 0        | --      | --  | -- |         |  |     |
| 2632036 | ZNF654     | NM_018293    | 31.47292  | 0.297172427 | 0.8019012  | 0        | --      | --  | -- |         |  |     |
| 2930592 | MAP3K7IP2  | NM_145342    | 88.697358 | 0.296269638 | 0.8064389  | 0        | --      | --  | -- |         |  |     |
| 3041519 | TRA2A      | NM_013293    | 38.829723 | 0.296051188 | 0.8104476  | 0        | 2.1E-01 | 1.6 |    | 1.3E-03 |  | Yes |
| 2978876 | PPIL4      | NM_139126    | 68.724457 | 0.294892123 | 0.8156648  | 0        | --      | --  | -- |         |  |     |
| 2619344 | NKTR       | NM_005385    | 31.401096 | 0.292846696 | 0.8046111  | 0        | --      | --  | -- |         |  |     |
| 2574752 | ERCC3      | NM_000122    | 36.979196 | 0.292689587 | 0.7883352  | 0        | 2.3E-02 | 1.2 |    | 5.3E-04 |  |     |
| 2878622 | TAF7       | NM_005642    | 30.070541 | 0.292058787 | 0.7876494  | 0        | --      | --  | -- |         |  |     |
| 2793054 | CBR4       | NM_032783    | 51.499993 | 0.291233601 | 0.8126359  | 0        | --      | --  | -- |         |  |     |
| 2982381 | TCP1       | NM_001008897 | 36.005435 | 0.290050563 | 0.7849103  | 0        | 9.7E-05 | 1.4 |    | 2.8E-02 |  |     |
| 2504883 | UGCG1      | NM_020120    | 28.408121 | 0.290004533 | 0.7835753  | 0        | --      | --  | -- |         |  |     |
| 2858668 | ERCC8      | NM_001007233 | 40.503637 | 0.288958372 | 0.8355205  | 0        | --      | --  | -- |         |  |     |
| 2854737 | PRKAA1     | NM_206907    | 34.142502 | 0.288691197 | 0.8141076  | 0        | 5.7E-01 | 1.2 |    | 4.2E-04 |  |     |
| 2817837 | MSH3       | NM_002439    | 39.571532 | 0.287799188 | 0.8133565  | 0        | --      | --  | -- |         |  |     |
| 2712858 | KIAA0794   | XM_087353    | 48.996645 | 0.28758981  | 0.7894889  | 0        | 6.8E-07 | 1.6 |    | 2.4E-03 |  |     |
| 2587747 | CIR        | NM_004882    | 31.556359 | 0.287165055 | 0.8379652  | 0        | --      | --  | -- |         |  | Yes |
| 2972310 | TDE2       | NM_020755    | 60.572436 | 0.285838004 | 0.7429208  | 0        | --      | --  | -- |         |  |     |
| 2526980 | XRCC5      | NM_021141    | 26.702787 | 0.285632203 | 0.7971359  | 0        | 2.2E-01 | 1.1 |    | 2.0E-04 |  |     |
| 2388525 | SDCCAG8    | NM_006642    | 29.238939 | 0.284094602 | 0.8062698  | 0        | 1.3E-03 | 1.5 |    | 4.0E-12 |  |     |
| 2495806 | MRPL30     | NM_145213    | 31.133872 | 0.283422489 | 0.8361324  | 0        | --      | --  | -- |         |  |     |
| 3923702 | TRPM2      | NM_003307    | 32.874346 | 0.280704586 | -0.8182504 | 7.16E-23 | 2.9E-14 | 1.3 |    | 4.3E-29 |  |     |
| 2978989 | LATS1      | NM_004690    | 27.441621 | 0.280656671 | 0.817303   | 0        | --      | --  | -- |         |  |     |
| 3107661 | FLJ20530   | NM_017864    | 35.641055 | 0.279406519 | 0.7633116  | 0        | --      | --  | -- |         |  |     |
| 2485433 | AFTIPHILIN | NM_017657    | 37.18278  | 0.279273064 | 0.7755733  | 0        | --      | --  | -- |         |  |     |
| 2498977 | GCC2       | NM_181453    | 55.27848  | 0.279271744 | 0.7956071  | 0        | --      | --  | -- |         |  |     |
| 2632051 | MGC26717   | NM_173824    | 39.513583 | 0.278218539 | 0.8104558  | 0        | --      | --  | -- |         |  |     |
| 3100909 | YTHDF3     | NM_152758    | 42.836833 | 0.277475029 | 0.7775994  | 0        | --      | --  | -- |         |  |     |
| 2368198 | CACYBP     | NM_001007214 | 31.632086 | 0.276820579 | 0.8362284  | 0        | --      | --  | -- |         |  |     |
| 2692573 | CCDC14     | NM_022757    | 32.378906 | 0.274164838 | 0.7897425  | 0        | 2.8E-05 | 1.8 |    | 9.3E-08 |  |     |
| 3042421 | HNRPA2B1   | NM_002137    | 37.157198 | 0.272245714 | 0.7730603  | 0        | --      | --  | -- |         |  | Yes |
| 3472225 | DDX54      | NM_024072    | 53.879855 | 0.272084695 | -0.7694112 | 8.10E-19 | 8.0E-04 | 1.2 |    | 9.3E-06 |  | Yes |
| 2347502 | ABCD3      | NM_002858    | 29.060953 | 0.271966291 | 0.8192485  | 0        | --      | --  | -- |         |  |     |
| 3695648 | ZDHHC1     | NM_013304    | 38.290778 | 0.270541876 | -0.8084176 | 5.80E-22 | 3.8E-20 | 1.8 |    | 1.0E-31 |  |     |
| 2523478 | RPL7L1     | NM_198486    | 32.596838 | 0.269746398 | 0.8142035  | 0        | --      | --  | -- |         |  |     |
| 2978957 | KATNA1     | NM_007044    | 36.32826  | 0.267647131 | 0.7740971  | 0        | 2.7E-04 | 1.4 |    | 1.1E-03 |  |     |
| 2921296 | AMD1       | NM_001634    | 37.3362   | 0.266039805 | 0.7557806  | 0        | --      | --  | -- |         |  |     |
| 2363902 | DUSP12     | NM_007240    | 25.661103 | 0.264610213 | 0.8101614  | 0        | --      | --  | -- |         |  |     |
| 2865860 | CCNH       | NM_001239    | 35.061064 | 0.264518443 | 0.7851749  | 0        | 2.4E-06 | 1.8 |    | 4.6E-02 |  |     |
| 2916952 | CASP8AP2   | NM_012115    | 23.808792 | 0.264084885 | 0.8091947  | 0        | --      | --  | -- |         |  |     |
| 2676352 | NEK4       | NM_003157    | 26.753123 | 0.261265628 | 0.790136   | 0        | --      | --  | -- |         |  |     |
| 2351940 | DDX20      | NM_007204    | 26.42616  | 0.261211508 | 0.8060313  | 0        | 9.3E-03 | 1.2 |    | 3.4E-05 |  | Yes |
| 2966253 | C6orf111   | NM_032870    | 31.419994 | 0.259821747 | 0.7800356  | 0        | --      | --  | -- |         |  |     |
| 2847292 | NSUN2      | NM_017755    | 29.55341  | 0.259290704 | 0.8204359  | 0        | --      | --  | -- |         |  | Yes |
| 2726828 | KIAA0276   | NM_015115    | 29.77525  | 0.258643158 | 0.8008333  | 0        | 1.0E+00 | 1.4 |    | 7.5E-05 |  |     |
| 2946845 | ZNF184     | NM_007149    | 36.596241 | 0.258047516 | 0.7761227  | 0        | 4.1E-04 | 1.6 |    | 2.9E-06 |  |     |
| 2369843 | CAP350     | NM_014810    | 25.039137 | 0.257594087 | 0.7883487  | 0        | --      | --  | -- |         |  |     |
| 2385197 | GNPAT      | NM_014236    | 29.979635 | 0.25678281  | 0.8199339  | 0        | --      | --  | -- |         |  |     |
| 2991103 | BZW2       | NM_014038    | 27.333029 | 0.256710716 | 0.8087149  | 0        | 1.4E-03 | 1.4 |    | 8.9E-01 |  |     |
| 2773907 | SDAD1      | NM_018115    | 27.806743 | 0.256667397 | 0.8029455  | 0        | 2.8E-01 | 1.3 |    | 1.2E-03 |  |     |
| 3066297 | SRPK2      | NM_182692    | 48.286823 | 0.255468506 | 0.7286068  | 4.44E-16 | 2.7E-01 | 1.3 |    | 9.2E-05 |  | Yes |
| 3095719 | GOLGA7     | NM_001002296 | 37.145937 | 0.255416366 | 0.7756322  | 0        | --      | --  | -- |         |  |     |
| 2676219 | PB1        | NM_018165    | 33.42101  | 0.254934396 | 0.7623962  | 0        | 1.2E-03 | 1.3 |    | 1.5E-04 |  |     |
| 3108901 | VPS13B     | NM_015243    | 38.18779  | 0.254737344 | 0.770775   | 0        | --      | --  | -- |         |  |     |
| 2615600 | SIMP       | NM_178862    | 31.734811 | 0.25449525  | 0.7802985  | 0        | 3.0E-05 | 1.5 |    | 7.8E-02 |  |     |
| 2456849 | STK6       | NM_003600    | 24.502968 | 0.253427254 | 0.7675403  | 0        | --      | --  | -- |         |  |     |

|         |           |              |           |             |            |          |         |     |         |     |
|---------|-----------|--------------|-----------|-------------|------------|----------|---------|-----|---------|-----|
| 2866704 | ARRDC3    | NM_020801    | 35.455509 | 0.253143007 | 0.7582099  | 0        | 1.8E-05 | 1.6 | 7.5E-05 |     |
| 2461999 | LYST      | NM_000081    | 51.555218 | 0.252535635 | 0.7632382  | 0        | 1.0E+00 | 1.1 | 1.8E-03 |     |
| 2553192 | ASB3      | NM_145863    | 26.363926 | 0.251564394 | 0.8097191  | 0        | --      | --  | --      |     |
| 2636272 | HSPC135   | NM_001008236 | 23.753819 | 0.250821857 | 0.8224402  | 0        | --      | --  | --      |     |
| 2454485 | LPGAT1    | NM_014873    | 30.471413 | 0.250517546 | 0.8029871  | 0        | 3.5E-02 | 1.5 | 7.5E-04 |     |
| 2768273 | NFXL1     | NM_152995    | 36.123277 | 0.250044089 | 0.8061461  | 0        | --      | --  | --      |     |
| 2602901 | TRIP12    | NM_004238    | 27.274995 | 0.249727267 | 0.7691509  | 0        | --      | --  | --      |     |
| 2590736 | NCKAP1    | NM_205842    | 34.592751 | 0.246660531 | 0.7798802  | 0        | --      | --  | --      |     |
| 2648873 | GMPS      | NM_003875    | 26.49863  | 0.246332774 | 0.7756245  | 0        | 7.5E-03 | 1.3 | 1.6E-03 |     |
| 3114618 | RNF139    | NM_007218    | 24.00028  | 0.24467393  | 0.8056827  | 0        | --      | --  | --      |     |
| 2737069 | METAP1    | NM_015143    | 33.966033 | 0.24385477  | 0.7385236  | 0        | --      | --  | --      |     |
| 2881607 | LOC134466 | XM_376436    | 43.512997 | 0.243060488 | 0.7447399  | 0        | 3.1E-08 | 2.0 | 1.0E-02 |     |
| 3157147 | LYNX1     | NM_177477    | 49.978044 | 0.242949533 | -0.8132338 | 2.11E-22 | 3.4E-19 | 2.0 | 7.6E-10 |     |
| 2499234 | FLJ32745  | NM_144978    | 30.191713 | 0.242374201 | 0.8102015  | 0        | --      | --  | --      |     |
| 3032017 | NYREN18   | NM_016118    | 24.423022 | 0.241584624 | 0.8076023  | 0        | --      | --  | --      |     |
| 2474651 | ZNF512    | NM_032434    | 27.482585 | 0.241125244 | 0.8065038  | 0        | --      | --  | --      |     |
| 2484970 | EHPB1     | NM_015252    | 28.230231 | 0.240577165 | 0.7403981  | 0        | --      | --  | --      |     |
| 2745499 | USP38     | NM_032557    | 25.742982 | 0.238433794 | 0.7872527  | 0        | --      | --  | --      |     |
| 2958117 | HMGCLL1   | NM_019036    | 46.716883 | 0.238399094 | 0.7347481  | 2.22E-16 | --      | --  | --      |     |
| 2867392 | MGC34713  | NM_173665    | 29.359575 | 0.238262679 | 0.7667139  | 0        | --      | --  | --      |     |
| 3005717 | KCTD7     | NM_153033    | 26.383443 | 0.237672533 | 0.8018511  | 0        | --      | --  | --      |     |
| 2594313 | FLJ37953  | NM_152382    | 34.360355 | 0.237432124 | 0.7819259  | 0        | --      | --  | --      |     |
| 2735598 | TIGD2     | NM_145715    | 28.493701 | 0.236682064 | 0.8021477  | 0        | --      | --  | --      |     |
| 2816563 | AGGF1     | NM_018046    | 46.661783 | 0.236643405 | 0.7604236  | 0        | --      | --  | --      | Yes |
| 2637980 | MDS010    | NM_020231    | 23.279801 | 0.236282216 | 0.8151725  | 0        | --      | --  | --      |     |
| 2620222 | ZNF501    | NM_145044    | 23.968905 | 0.236128112 | 0.8066662  | 0        | --      | --  | --      |     |
| 2571217 | ZC3H8     | NM_032494    | 29.418372 | 0.234843199 | 0.7862778  | 0        | --      | --  | --      |     |
| 3105430 | KIAA1764  | NM_033402    | 27.661906 | 0.233117402 | 0.787725   | 0        | --      | --  | --      |     |
| 2998536 | CDC2L5    | NM_031267    | 27.176019 | 0.2330913   | 0.7817023  | 0        | --      | --  | --      |     |
| 2525053 | CREB1     | NM_004379    | 25.201291 | 0.232654782 | 0.7706322  | 0        | --      | --  | --      |     |
| 2769947 | CLOCK     | NM_004898    | 69.715149 | 0.229364515 | 0.7234385  | 8.88E-16 | --      | --  | --      |     |
| 2655113 | DRE1      | NM_017644    | 27.031568 | 0.226933845 | 0.779746   | 0        | 9.6E-06 | 1.6 | 1.4E-02 |     |
| 2951916 | STK38     | NM_007271    | 22.883695 | 0.226614457 | 0.8130663  | 0        | --      | --  | --      |     |
| 2808438 | NNT       | NM_182977    | 23.842521 | 0.226604835 | 0.7863534  | 0        | 3.5E-01 | 1.1 | 2.8E-07 |     |
| 2773756 | G3BP2     | NM_203505    | 25.000864 | 0.226448482 | 0.7130932  | 3.11E-15 | 1.3E-01 | 1.3 | 5.1E-05 |     |
| 2973232 | KIAA0408  | NM_014702    | 31.616243 | 0.226026814 | 0.6963361  | 2.53E-14 | 1.4E-02 | 1.7 | 1.1E-04 |     |
| 2853642 | FLJ13231  | NM_023073    | 43.271969 | 0.224920207 | 0.7130426  | 3.11E-15 | --      | --  | --      |     |
| 3842327 | HSU79303  | NM_013301    | 39.652798 | 0.223075074 | -0.7778484 | 1.92E-19 | 4.8E-09 | 1.4 | 2.1E-03 |     |
| 2934089 | WTAP      | NM_004906    | 22.140374 | 0.221916958 | 0.7860009  | 0        | --      | --  | --      | Yes |
| 2964200 | UBE2J1    | NM_016021    | 30.796414 | 0.221534555 | 0.719221   | 1.33E-15 | --      | --  | --      |     |
| 2348854 | LOC441092 | XM_499006    | 41.891173 | 0.22072839  | 0.7667735  | 0        | --      | --  | --      |     |
| 2597273 | FLJ23861  | NM_152519    | 25.668097 | 0.220273181 | 0.7672696  | 0        | 6.1E-03 | 1.5 | 3.9E-04 |     |
| 2568968 | UXS1      | NM_025076    | 22.883553 | 0.220050918 | 0.788156   | 0        | --      | --  | --      |     |
| 2796875 | FLJ11200  | NM_018359    | 44.930926 | 0.218990618 | 0.7448317  | 0        | --      | --  | --      |     |
| 2413578 | TMEM59    | NM_004872    | 20.983843 | 0.218735025 | 0.7765473  | 0        | --      | --  | --      |     |
| 2400322 | HP1BP3    | NM_016287    | 20.443303 | 0.218139106 | 0.7823335  | 0        | --      | --  | --      |     |
| 3740462 | RILP      | NM_031430    | 43.756801 | 0.217933548 | -0.7872994 | 3.53E-20 | --      | --  | --      |     |
| 2829416 | SEC24A    | XM_094581    | 23.550993 | 0.217904508 | 0.7804732  | 0        | --      | --  | --      |     |
| 2876146 | CDKL3     | NM_016508    | 22.786942 | 0.217747974 | 0.8124897  | 0        | --      | --  | --      |     |
| 2589929 | SESTD1    | NM_178123    | 28.610241 | 0.215715095 | 0.6888757  | 6.13E-14 | 3.6E-04 | 1.4 | 3.9E-04 |     |
| 2344393 | PRKACB    | NM_182948    | 36.425604 | 0.215669957 | 0.7361915  | 0        | 5.2E-06 | 2.1 | 5.0E-22 |     |
| 2496536 | RPL31     | NM_000993    | 21.916993 | 0.215633811 | 0.79348    | 0        | --      | --  | --      |     |
| 2970532 | HDAC2     | NM_001527    | 22.388373 | 0.215422736 | 0.7848346  | 0        | 3.8E-04 | 1.4 | 4.0E-05 |     |
| 3157901 | PLEC1     | NM_201378    | 28.205392 | 0.214821377 | -0.7628493 | 2.38E-18 | 7.9E-13 | 1.8 | 2.5E-26 |     |
| 2700727 | SERP1     | NM_014445    | 32.502251 | 0.21384746  | 0.7554526  | 0        | --      | --  | --      |     |
| 2800906 | MTRR      | NM_024010    | 27.315796 | 0.211958136 | 0.7940789  | 0        | --      | --  | --      |     |
| 2459042 | CDC42BPA  | NM_003607    | 45.919797 | 0.211626665 | 0.7201263  | 1.33E-15 | 8.4E-01 | 1.2 | 1.5E-05 |     |
| 2880932 | C5NK1A1   | NM_001892    | 26.111907 | 0.210955343 | 0.7693124  | 0        | 3.5E-04 | 1.2 | 1.5E-05 |     |
| 2519756 | WDR75     | NM_032168    | 24.761132 | 0.21094851  | 0.7919346  | 0        | --      | --  | --      |     |
| 3190893 | C9orf54   | NM_032809    | 29.004739 | 0.210606046 | -0.8039524 | 1.44E-21 | 2.7E-10 | 1.3 | 1.7E-01 |     |
| 2400718 | USP48     | NM_032236    | 20.85048  | 0.209341139 | 0.7968415  | 0        | --      | --  | --      |     |
| 2474681 | XAB1      | NM_007266    | 23.424807 | 0.207739738 | 0.6936272  | 3.51E-14 | --      | --  | --      |     |
| 2481271 | HTLF      | NM_002158    | 25.3707   | 0.206987409 | 0.7578648  | 0        | 1.1E-04 | 1.8 | 1.1E-01 |     |
| 2419046 | ZZZ3      | NM_015534    | 24.039796 | 0.206458073 | 0.7644446  | 0        | --      | --  | --      |     |
| 2421753 | GTF2B     | NM_001514    | 24.419998 | 0.205508998 | 0.759234   | 0        | --      | --  | --      |     |
| 2563481 | LOC51315  | NM_016618    | 27.401313 | 0.205319836 | 0.7997803  | 0        | --      | --  | --      |     |
| 2475407 | RSNL2     | NM_024692    | 24.139369 | 0.205287023 | 0.7841309  | 0        | --      | --  | --      |     |
| 2461717 | LOC440734 | XM_496443    | 28.3102   | 0.20526773  | 0.774197   | 0        | --      | --  | --      |     |
| 3004665 | ZNF138    | NM_006524    | 23.877501 | 0.202773082 | 0.7921362  | 0        | --      | --  | --      |     |
| 2724472 | HIP2      | NM_005339    | 28.05607  | 0.202707914 | 0.7870532  | 0        | --      | --  | --      |     |
| 3066751 | SYPL1     | NM_006754    | 21.445526 | 0.201276307 | 0.7941055  | 0        | --      | --  | --      |     |
| 3024275 | MKLN1     | NM_013255    | 28.610859 | 0.200967318 | 0.7370057  | 0        | 8.9E-02 | 1.4 | 1.1E-05 |     |
| 2911413 | PRIM2A    | NM_000947    | 29.062223 | 0.198595829 | 0.731777   | 2.22E-16 | --      | --  | --      |     |
| 3005069 | ZNF92     | NM_152626    | 19.645742 | 0.198273667 | 0.7850284  | 0        | --      | --  | --      |     |
| 2519860 | NS3TP1    | NM_019048    | 21.038649 | 0.198235323 | 0.7954407  | 0        | 6.2E-02 | 1.3 | 1.5E-03 |     |
| 3766893 | DDX5      | NM_004396    | 24.081983 | 0.198107281 | 0.792821   | 0        | 1.8E-04 | 1.5 | 2.6E-02 | Yes |
| 2443335 | C1orf114  | NM_021179    | 32.917006 | 0.197778799 | 0.7626174  | 0        | --      | --  | --      |     |
| 2988459 | RBAK      | NM_021163    | 30.551338 | 0.197561352 | 0.7649705  | 0        | --      | --  | --      |     |
| 2724235 | WDR19     | NM_025132    | 21.71494  | 0.197328793 | 0.7783038  | 0        | 4.6E-03 | 1.7 | 2.1E-07 |     |
| 2553771 | KIAA1212  | NM_018084    | 32.062167 | 0.196780409 | 0.6874481  | 7.26E-14 | --      | --  | --      |     |
| 2622469 | RBM5      | NM_005778    | 17.532091 | 0.195386683 | 0.7696117  | 0        | --      | --  | --      | Yes |

|         |               |              |           |             |            |          |         |     |         |    |    |     |
|---------|---------------|--------------|-----------|-------------|------------|----------|---------|-----|---------|----|----|-----|
| 2512601 | TANK          | NM_004180    | 29.916054 | 0.195314648 | 0.7971332  | 0        | --      | --  | --      | -- | -- | --  |
| 2668425 | CLASP2        | NM_015097    | 32.915389 | 0.194080146 | 0.6779296  | 2.14E-13 | 2.3E-02 | 1.3 | 1.8E-06 |    |    |     |
| 2924619 | C6orf75       | NM_021820    | 26.699941 | 0.194079017 | 0.7790369  | 0        | --      | --  | --      | -- | -- | --  |
| 2823820 | WDR36         | NM_139281    | 18.521935 | 0.193945059 | 0.7534665  | 0        | --      | --  | --      | -- | -- | Yes |
| 2979679 | ZBTB2         | NM_020861    | 22.330098 | 0.193681191 | 0.7695882  | 0        | --      | --  | --      | -- | -- | --  |
| 2434438 | MCL1          | NM_021960    | 21.805089 | 0.193440845 | 0.7630602  | 0        | 3.2E-02 | 1.3 | 4.1E-11 |    |    |     |
| 2530599 | HRB           | NM_004504    | 21.520696 | 0.193070439 | 0.7605689  | 0        | 3.4E-01 | 1.1 | 1.8E-03 |    |    |     |
| 3078656 | FLJ12700      | NM_024910    | 18.879073 | 0.193034895 | 0.7834959  | 0        | 6.7E-01 | 1.2 | 1.7E-05 |    |    |     |
| 2555630 | CCT4          | NM_006430    | 20.339661 | 0.192504645 | 0.753522   | 0        | 1.2E-02 | 1.4 | 1.5E-04 |    |    |     |
| 3087555 | FLJ32642      | NM_152415    | 20.842798 | 0.191169869 | 0.7889465  | 0        | --      | --  | --      | -- | -- | --  |
| 3358854 | DUSP8         | NM_004420    | 30.441217 | 0.190715994 | -0.7773219 | 2.10E-19 | 1.2E-05 | 1.7 | 9.5E-02 |    |    |     |
| 2869275 | FLJ20125      | NM_017676    | 20.027137 | 0.189652427 | 0.7766135  | 0        | 3.4E-01 | 1.2 | 2.4E-04 |    |    |     |
| 3012677 | DKFZP564O0523 | NM_032120    | 19.802522 | 0.189350274 | 0.7859569  | 0        | --      | --  | --      | -- | -- | --  |
| 3045739 | FLJ22313      | NM_022373    | 25.747818 | 0.189151047 | 0.7052965  | 8.44E-15 | 1.5E-02 | 1.2 | 1.0E-03 |    |    |     |
| 2452319 | RBBP5         | NM_005057    | 18.476742 | 0.188842972 | 0.7905595  | 0        | --      | --  | --      | -- | -- | --  |
| 3045004 | NT5C3         | NM_001002009 | 18.41074  | 0.188227772 | 0.7864055  | 0        | 3.2E-01 | 1.2 | 4.0E-04 |    |    |     |
| 2688882 | C3orf17       | NM_015412    | 19.156788 | 0.188198268 | 0.7630423  | 0        | --      | --  | --      | -- | -- | --  |
| 3266934 | NANOS1        | NM_001009553 | 26.740041 | 0.188060727 | -0.7661449 | 1.39E-18 | 1.8E-12 | 1.3 | 4.0E-02 |    |    |     |
| 2330899 | UTP11L        | NM_016037    | 19.457426 | 0.186365244 | 0.7924791  | 0        | --      | --  | --      | -- | -- | Yes |
| 2527856 | PLCD4         | NM_032726    | 18.126215 | 0.186219048 | 0.7572122  | 0        | --      | --  | --      | -- | -- | --  |
| 2426840 | WDR47         | NM_014969    | 25.178691 | 0.185791043 | 0.7484699  | 0        | 1.7E-07 | 2.0 | 2.0E-02 |    |    |     |
| 3726325 | XYLT2         | NM_022167    | 27.410182 | 0.185686933 | -0.7696324 | 7.80E-19 | 3.6E-22 | 1.8 | 8.0E-11 |    |    |     |
| 2693081 | ZNF148        | NM_021964    | 19.604556 | 0.185325723 | 0.7192251  | 1.33E-15 | --      | --  | --      | -- | -- | --  |
| 2936564 | FGFR1OP       | NM_194429    | 22.131762 | 0.184743454 | 0.795178   | 0        | --      | --  | --      | -- | -- | --  |
| 2890148 | HNRPH1        | NM_005520    | 17.959343 | 0.184111967 | 0.7099906  | 4.66E-15 | 1.5E-03 | 1.5 | 4.1E-03 |    |    | Yes |
| 2443235 | NME7          | NM_013330    | 20.749364 | 0.183830676 | 0.7727648  | 0        | 3.1E-03 | 1.6 | 1.3E-04 |    |    |     |
| 2756404 | KIAA1982      | NM_133474    | 28.793938 | 0.183589586 | 0.7134792  | 3.11E-15 | --      | --  | --      | -- | -- | --  |
| 3995804 | FLJ43855      | NM_198857    | 23.789095 | 0.182930184 | -0.7915167 | 1.61E-20 | 3.9E-16 | 1.5 | 1.3E-32 |    |    |     |
| 2713074 | NCBP2         | NM_007362    | 28.370037 | 0.182922836 | 0.7587527  | 0        | --      | --  | --      | -- | -- | Yes |
| 3011977 | LOC85865      | NM_033107    | 22.566908 | 0.182741438 | 0.7698181  | 0        | --      | --  | --      | -- | -- | --  |
| 2836665 | SAP30L        | NM_024632    | 21.144681 | 0.182610254 | 0.7603761  | 0        | --      | --  | --      | -- | -- | --  |
| 2632491 | NSUN3         | NM_022072    | 19.31226  | 0.181729293 | 0.7615157  | 0        | --      | --  | --      | -- | -- | --  |
| 2859195 | HSA9761       | NM_014473    | 22.70678  | 0.181045551 | 0.7830639  | 0        | --      | --  | --      | -- | -- | Yes |
| 2403557 | C1orf79       | XM_378848    | 23.054137 | 0.180808132 | 0.758899   | 0        | --      | --  | --      | -- | -- | --  |
| 2402068 | CBPIN         | NM_015484    | 20.664106 | 0.180546753 | 0.7487367  | 0        | --      | --  | --      | -- | -- | --  |
| 2691798 | LOC340192     | XM_291170    | 18.578521 | 0.180230811 | 0.7780137  | 0        | --      | --  | --      | -- | -- | --  |
| 2697490 | Cep70         | NM_024491    | 31.987412 | 0.179300788 | 0.712555   | 3.33E-15 | --      | --  | --      | -- | -- | --  |
| 2666904 | SLC4A7        | NM_003615    | 22.777972 | 0.178860878 | 0.741996   | 0        | 6.1E-05 | 1.9 | 1.0E-24 |    |    |     |
| 2764054 | SLA/LP        | NM_016955    | 24.551736 | 0.178843328 | 0.7318185  | 2.22E-16 | --      | --  | --      | -- | -- | --  |
| 2523419 | ALS2CR8       | NM_024744    | 26.547495 | 0.178298162 | 0.7487984  | 0        | 6.3E-02 | 1.2 | 4.2E-07 |    |    |     |
| 2758686 | LYAR          | NM_017816    | 18.808765 | 0.17764285  | 0.7164759  | 2.00E-15 | --      | --  | --      | -- | -- | --  |
| 2670784 | SEC22L3       | NM_004206    | 17.31098  | 0.176896998 | 0.7940409  | 0        | --      | --  | --      | -- | -- | --  |
| 2594535 | PPIL3         | NM_130906    | 25.58099  | 0.176710998 | 0.705901   | 7.99E-15 | --      | --  | --      | -- | -- | Yes |
| 2992963 | LOC90693      | NM_138771    | 24.203557 | 0.176486012 | 0.7714455  | 0        | --      | --  | --      | -- | -- | --  |
| 2749191 | GLRB          | NM_000824    | 29.589833 | 0.175398066 | 0.7432664  | 0        | --      | --  | --      | -- | -- | --  |
| 3044753 | LSM5          | NM_012322    | 25.157596 | 0.175260426 | 0.7796548  | 0        | --      | --  | --      | -- | -- | Yes |
| 2711644 | ATP13A3       | AK024639     | 19.94764  | 0.174882136 | 0.7190092  | 1.33E-15 | 1.1E-01 | 1.2 | 8.6E-04 |    |    |     |
| 2472914 | UBXD4         | NM_181713    | 28.292772 | 0.174269428 | 0.7708318  | 0        | --      | --  | --      | -- | -- | --  |
| 2654815 | ATP11B        | NM_014616    | 18.017717 | 0.17371026  | 0.7861945  | 0        | --      | --  | --      | -- | -- | --  |
| 3053229 | ZNF680        | NM_178558    | 18.749738 | 0.173047974 | 0.7579128  | 0        | --      | --  | --      | -- | -- | --  |
| 2560704 | C2orf3        | NM_003203    | 18.302229 | 0.172903296 | 0.7659696  | 0        | --      | --  | --      | -- | -- | --  |
| 2621827 | ARIH2         | NM_006321    | 17.286704 | 0.172882756 | 0.786249   | 0        | 9.4E-01 | 1.1 | 1.2E-03 |    |    |     |
| 2370123 | XPR1          | NM_004736    | 19.86291  | 0.172686548 | 0.7500481  | 0        | 6.2E-04 | 1.3 | 2.6E-02 |    |    |     |
| 2750227 | FLJ11184      | NM_018352    | 17.79205  | 0.171698261 | 0.7813126  | 0        | --      | --  | --      | -- | -- | --  |
| 2366028 | IQWD1         | NM_001017977 | 29.675501 | 0.171689346 | 0.7261842  | 4.44E-16 | --      | --  | --      | -- | -- | --  |
| 2703133 | WDR56         | NM_020800    | 24.739704 | 0.17141511  | 0.7756576  | 0        | 1.0E+00 | 1.3 | 5.8E-10 |    |    |     |
| 2884647 | LOC63920      | NM_022090    | 23.323616 | 0.170847395 | 0.7692828  | 0        | --      | --  | --      | -- | -- | --  |
| 2998404 | RALA          | NM_005402    | 27.881981 | 0.1708191   | 0.7112827  | 4.00E-15 | --      | --  | --      | -- | -- | --  |
| 2753880 | CARF          | NM_017632    | 23.283557 | 0.170238484 | 0.7360779  | 0        | --      | --  | --      | -- | -- | --  |
| 2921086 | CDC40         | NM_015891    | 26.010712 | 0.169603641 | 0.7478103  | 0        | 8.6E-01 | 1.2 | 6.8E-05 |    |    | Yes |
| 2691718 | GOLGB1        | NM_004487    | 40.708269 | 0.168897478 | 0.7325591  | 2.22E-16 | --      | --  | --      | -- | -- | --  |
| 2491702 | USP39         | NM_006590    | 18.552776 | 0.167606144 | 0.6723473  | 3.98E-13 | --      | --  | --      | -- | -- | Yes |
| 2331937 | LOC441120     | NM_001013718 | 20.353502 | 0.167241826 | 0.7636359  | 0        | --      | --  | --      | -- | -- | --  |
| 2556017 | LOC51057      | AL833623     | 15.775463 | 0.16723759  | 0.7641138  | 0        | --      | --  | --      | -- | -- | --  |
| 2792069 | LOC92345      | NM_138386    | 33.228017 | 0.167117613 | 0.7838293  | 0        | --      | --  | --      | -- | -- | --  |
| 2618598 | GC20          | NM_005875    | 22.446665 | 0.166470946 | 0.761201   | 0        | --      | --  | --      | -- | -- | --  |
| 2425212 | DBT           | NM_001918    | 44.661215 | 0.166264351 | 0.7486583  | 0        | --      | --  | --      | -- | -- | --  |
| 3105467 | E2F5          | NM_001951    | 19.370636 | 0.166235847 | 0.7184019  | 1.55E-15 | 6.1E-02 | 1.4 | 6.5E-05 |    |    |     |
| 3091628 | ELP3          | NM_018091    | 17.728218 | 0.165995286 | 0.7828713  | 0        | --      | --  | --      | -- | -- | --  |
| 2968652 | SESN1         | NM_014454    | 19.168908 | 0.165949267 | 0.7785238  | 0        | --      | --  | --      | -- | -- | --  |
| 2754582 | SNX25         | NM_031953    | 18.909946 | 0.16510961  | 0.7732564  | 0        | 7.0E-04 | 1.6 | 7.4E-05 |    |    |     |
| 2642325 | ATP2C1        | NM_014382    | 39.666227 | 0.165034301 | 0.703213   | 1.11E-14 | --      | --  | --      | -- | -- | --  |
| 2972063 | C6orf170      | NM_152730    | 35.246665 | 0.164718534 | 0.7442927  | 0        | --      | --  | --      | -- | -- | --  |
| 2553682 | FLJ31438      | NM_152385    | 23.347116 | 0.164365476 | 0.7509396  | 0        | 4.5E-05 | 1.5 | 1.9E-07 |    |    |     |
| 3101385 | CHPPR         | NM_014637    | 19.408469 | 0.164256832 | 0.7616269  | 0        | --      | --  | --      | -- | -- | --  |
| 2664395 | HPCL2         | NM_012260    | 23.44734  | 0.164003704 | 0.7544777  | 0        | 3.0E-04 | 1.4 | 1.4E-02 |    |    |     |
| 2349402 | AMY2A         | NM_000699    | 17.488559 | 0.163661354 | 0.7359726  | 0        | 9.6E-01 | 1.2 | 1.2E-03 |    |    |     |
| 3847703 | MLLT1         | NM_005934    | 27.323357 | 0.162904995 | -0.7482137 | 2.35E-17 | 9.1E-05 | 1.3 | 1.8E-13 |    |    |     |
| 2938196 | SEC5L1        | NM_018303    | 20.683246 | 0.162653664 | 0.7407993  | 0        | 2.1E-02 | 1.3 | 1.7E-04 |    |    |     |
| 2386747 | TM7SF1        | NM_003272    | 20.493642 | 0.162401824 | 0.7576969  | 0        | 5.2E-04 | 1.5 | 4.9E-04 |    |    |     |
| 2434490 | ENSA          | NM_207042    | 18.235533 | 0.161256072 | 0.7659375  | 0        | 2.6E-03 | 1.4 | 2.4E-08 |    |    |     |

|         |               |              |           |             |            |          |         |     |         |  |     |
|---------|---------------|--------------|-----------|-------------|------------|----------|---------|-----|---------|--|-----|
| 2616317 | PDCD6IP       | NM_013374    | 15.628396 | 0.160848921 | 0.7749652  | 0        | --      | --  | --      |  |     |
| 2986493 | PSMB1         | NM_002793    | 19.237107 | 0.159334594 | 0.7283733  | 4.44E-16 | --      | --  | --      |  |     |
| 2694644 | ZNF9          | NM_003418    | 17.813947 | 0.159285392 | 0.6649663  | 8.82E-13 | --      | --  | --      |  |     |
| 2852237 | GOLPH3        | NM_022130    | 15.064136 | 0.15925211  | 0.7775575  | 0        | --      | --  | --      |  |     |
| 2780656 | PHF22         | NM_020395    | 17.595864 | 0.158818085 | 0.7766064  | 0        | --      | --  | --      |  | Yes |
| 2734018 | MRPS18C       | NM_016067    | 17.474802 | 0.15711755  | 0.7913249  | 0        | --      | --  | --      |  |     |
| 3083778 | MCPH1         | NM_024596    | 18.663961 | 0.156356537 | 0.7213819  | 1.11E-15 | --      | --  | --      |  |     |
| 2540210 | FLJ14075      | NM_024894    | 15.667269 | 0.155680736 | 0.7619563  | 0        | --      | --  | --      |  |     |
| 2770193 | AASDH         | NM_181806    | 21.897136 | 0.155641382 | 0.7624223  | 0        | --      | --  | --      |  |     |
| 3017123 | S100A11       | NM_005620    | 14.938076 | 0.154819707 | 0.7741044  | 0        | --      | --  | --      |  |     |
| 2866590 | LYSMD3        | XM_371760    | 21.413211 | 0.154454834 | 0.7548031  | 0        | --      | --  | --      |  |     |
| 2434892 | TCFL1         | NM_005997    | 16.661255 | 0.154034388 | 0.6725614  | 3.89E-13 | --      | --  | --      |  |     |
| 2951674 | SRPK1         | NM_003137    | 18.191855 | 0.153401648 | 0.7150874  | 2.44E-15 | 7.6E-05 | 1.4 | 2.0E-06 |  | Yes |
| 2549455 | THUMP2D       | NM_025264    | 22.695978 | 0.153155541 | 0.7550436  | 0        | --      | --  | --      |  |     |
| 2350551 | SARS          | NM_006513    | 15.571121 | 0.152593812 | 0.7055809  | 8.22E-15 | --      | --  | --      |  | Yes |
| 2607568 | CHL1          | NM_006614    | 24.154823 | 0.152352931 | 0.6264735  | 3.99E-11 | 4.1E-03 | 1.6 | 1.4E-06 |  |     |
| 3092276 | LEPROTL1      | NM_015344    | 15.151444 | 0.152344117 | 0.6960892  | 2.62E-14 | --      | --  | --      |  |     |
| 2724585 | N4BP2         | NM_018177    | 28.466096 | 0.151281603 | 0.6931038  | 3.73E-14 | 6.3E-01 | 1.4 | 4.7E-04 |  |     |
| 2647216 | HPS3          | NM_032383    | 17.733316 | 0.150802683 | 0.7515377  | 0        | --      | --  | --      |  |     |
| 2591906 | OSGEPL1       | NM_022353    | 17.639597 | 0.150687431 | 0.7431292  | 0        | --      | --  | --      |  |     |
| 2721809 | ZCCHC4        | XM_376310    | 17.833353 | 0.150228573 | 0.7590171  | 0        | --      | --  | --      |  |     |
| 2544179 | SF3B14        | NM_016047    | 18.376946 | 0.149622119 | 0.7409978  | 0        | --      | --  | --      |  | Yes |
| 2828135 | LOC90624      | BC022429     | 34.780406 | 0.149281228 | 0.6960699  | 2.62E-14 | --      | --  | --      |  |     |
| 2573786 | MKI67IP       | NM_032390    | 15.138341 | 0.149235262 | 0.7445435  | 0        | --      | --  | --      |  |     |
| 2644822 | MRPS22        | NM_020191    | 17.18285  | 0.149097148 | 0.7655699  | 0        | --      | --  | --      |  |     |
| 2361036 | DAP3          | NM_004632    | 15.171211 | 0.148579646 | 0.66183    | 1.23E-12 | --      | --  | --      |  |     |
| 2880905 | CSNK1A1       | NM_001025105 | 28.895157 | 0.147746571 | 0.7043145  | 9.55E-15 | 3.3E-05 | 1.6 | 1.9E-02 |  |     |
| 2691982 | KPNA1         | NM_002264    | 15.506278 | 0.147575404 | 0.7173591  | 1.78E-15 | --      | --  | --      |  |     |
| 3096171 | POLB          | NM_002690    | 17.567867 | 0.14727183  | 0.6952136  | 2.91E-14 | --      | --  | --      |  |     |
| 2350287 | FND07         | NM_173532    | 18.823291 | 0.146907184 | 0.7347313  | 2.22E-16 | --      | --  | --      |  |     |
| 2376037 | MDM4          | NM_002393    | 16.350256 | 0.146590156 | 0.7533729  | 0        | 1.0E+00 | 1.2 | 4.8E-05 |  |     |
| 2859494 | FLJ36754      | NM_173829    | 18.14115  | 0.14630818  | 0.7118068  | 3.55E-15 | --      | --  | --      |  |     |
| 2843804 | DKFZp686E2433 | XM_293828    | 14.773548 | 0.146092829 | 0.7467329  | 0        | --      | --  | --      |  |     |
| 2679864 | PSMD6         | NM_014814    | 22.832969 | 0.145270014 | 0.7095559  | 4.88E-15 | --      | --  | --      |  |     |
| 2357996 | VPS45A        | NM_007259    | 39.644958 | 0.144833738 | 0.6760184  | 2.66E-13 | --      | --  | --      |  |     |
| 2413423 | TMEM48        | NM_018087    | 25.621176 | 0.144085789 | 0.7182132  | 1.78E-15 | --      | --  | --      |  |     |
| 2659918 | LRCH3         | NM_032773    | 16.801113 | 0.144032774 | 0.6743287  | 3.20E-13 | 3.1E-01 | 1.2 | 8.7E-07 |  |     |
| 3832830 | PAK4          | NM_001014833 | 50.185616 | 0.143765494 | -0.6643777 | 9.39E-13 | 1.7E-04 | 1.2 | 1.8E-01 |  |     |
| 2824872 | AP3S1         | NM_001002924 | 18.529772 | 0.143483432 | 0.7277432  | 4.44E-16 | --      | --  | --      |  |     |
| 2521997 | FLJ38973      | NM_153689    | 22.481745 | 0.143317091 | 0.7055132  | 8.22E-15 | --      | --  | --      |  |     |
| 2375810 | ZC3H11A       | NM_014827    | 17.862986 | 0.142829186 | 0.7600176  | 0        | 1.0E+00 | 1.1 | 2.2E-04 |  |     |
| 3107151 | LOC441370     | XM_499124    | 15.989658 | 0.142637875 | 0.7654851  | 0        | --      | --  | --      |  |     |
| 2840002 | FLJ20364      | NM_017785    | 43.149594 | 0.141989287 | 0.6944899  | 3.15E-14 | --      | --  | --      |  |     |
| 2741768 | EXOSC9        | NM_005033    | 14.860294 | 0.140937534 | 0.6478566  | 5.14E-12 | --      | --  | --      |  | Yes |
| 2380554 | CGI-115       | NM_016052    | 16.662359 | 0.140456876 | 0.7538525  | 0        | --      | --  | --      |  |     |
| 3106539 | CGI-77        | NM_016023    | 36.781643 | 0.139720555 | 0.6945893  | 3.13E-14 | --      | --  | --      |  |     |
| 2767378 | ATP8A1        | NM_006095    | 18.761818 | 0.138632452 | 0.6732     | 3.62E-13 | --      | --  | --      |  |     |
| 2629693 | LOC389129     | XM_371647    | 13.793403 | 0.136899918 | 0.7683764  | 0        | --      | --  | --      |  |     |
| 2408111 | TRIT1         | NM_017646    | 13.364064 | 0.136620398 | 0.693956   | 3.38E-14 | --      | --  | --      |  | Yes |
| 2685034 | LOC401078     | XM_379200    | 16.870848 | 0.136557792 | 0.7425633  | 0        | --      | --  | --      |  |     |
| 2996321 | B1            | NM_198428    | 18.61219  | 0.135632179 | 0.7077115  | 6.22E-15 | 4.7E-01 | 1.2 | 4.9E-08 |  |     |
| 2486520 | ETAA16        | NM_019002    | 27.986501 | 0.135361852 | 0.7377865  | 0        | --      | --  | --      |  |     |
| 3018375 | PRKAR2B       | NM_002736    | 20.312421 | 0.135151377 | 0.7011151  | 1.42E-14 | 4.1E-04 | 1.8 | 2.6E-03 |  |     |
| 2406064 | SFPQ          | NM_005066    | 13.215273 | 0.13437169  | 0.7177019  | 1.78E-15 | 1.7E-03 | 1.4 | 6.4E-03 |  | Yes |
| 2607020 | PASK          | NM_015148    | 12.579467 | 0.133582055 | 0.7505457  | 0        | --      | --  | --      |  |     |
| 2491615 | MAT2A         | NM_005911    | 12.848498 | 0.13343415  | 0.7254092  | 6.66E-16 | --      | --  | --      |  |     |
| 2331903 | ZNF643        | NM_023070    | 18.935539 | 0.133139128 | 0.7231991  | 8.88E-16 | 3.3E-04 | 1.5 | 1.0E+00 |  |     |
| 3003193 | CCT6A         | NM_001762    | 14.653415 | 0.132342884 | 0.7587466  | 0        | 1.2E-01 | 1.4 | 4.4E-06 |  |     |
| 2980290 | RGS17         | NM_012419    | 19.968576 | 0.132136055 | 0.6878277  | 6.93E-14 | --      | --  | --      |  |     |
| 2888519 | RAP80         | NM_016290    | 20.381522 | 0.131775497 | 0.6653696  | 8.45E-13 | 8.8E-04 | 1.5 | 1.7E-06 |  |     |
| 3076340 | BRAF          | NM_004333    | 13.337262 | 0.131444072 | 0.7094728  | 4.88E-15 | --      | --  | --      |  |     |
| 2951300 | TAF11         | NM_005643    | 25.729066 | 0.131346369 | 0.7378623  | 0        | --      | --  | --      |  |     |
| 2966232 | COQ3          | NM_017421    | 12.789658 | 0.131317043 | 0.7334673  | 2.22E-16 | --      | --  | --      |  |     |
| 2531522 | CAB39         | NM_016289    | 16.562689 | 0.130987543 | 0.6572271  | 1.98E-12 | --      | --  | --      |  |     |
| 3887069 | C20orf161     | NM_033421    | 26.546497 | 0.130593035 | -0.7546403 | 8.77E-18 | 1.3E-05 | 1.1 | 6.1E-06 |  |     |
| 2995254 | Ells1         | NM_152793    | 19.255118 | 0.12939319  | 0.6140374  | 1.23E-10 | 9.4E-05 | 1.6 | 2.1E-06 |  |     |
| 2484457 | AHSA2         | NM_152392    | 14.595915 | 0.129265421 | 0.7323014  | 2.22E-16 | 3.3E-02 | 1.6 | 7.4E-04 |  |     |
| 2832431 | PCDHB11       | NM_018931    | 12.910577 | 0.129215098 | 0.7630196  | 0        | 1.5E-02 | 1.5 | 2.4E-04 |  |     |
| 2706938 | GNB4          | NM_021629    | 18.082001 | 0.12883681  | 0.7206005  | 1.33E-15 | 4.2E-02 | 1.4 | 4.2E-04 |  |     |
| 2727793 | TPARL         | NM_018475    | 23.842348 | 0.128233198 | 0.6222694  | 5.87E-11 | 5.7E-01 | 1.4 | 1.7E-07 |  |     |
| 2331213 | MACF1         | NM_012090    | 17.7761   | 0.127601168 | 0.6418578  | 9.28E-12 | 2.9E-02 | 1.4 | 2.5E-87 |  |     |
| 3831260 | ZNF146        | NM_007145    | 18.53805  | 0.127029938 | 0.7207474  | 1.11E-15 | --      | --  | --      |  |     |
| 2847710 | MGC5297       | NM_024091    | 18.876375 | 0.126970288 | 0.7160304  | 2.22E-15 | 2.1E-05 | 1.4 | 4.6E-01 |  |     |
| 2969201 | C6orf199      | NM_145025    | 18.396813 | 0.126706422 | 0.7106621  | 4.44E-15 | --      | --  | --      |  |     |
| 2374345 | CAMSAP1L1     | NM_203459    | 22.175752 | 0.126353439 | 0.630144   | 2.84E-11 | 1.0E+00 | 1.2 | 8.1E-06 |  |     |
| 2742134 | SPATA5        | NM_145207    | 15.116423 | 0.125273853 | 0.7229709  | 8.88E-16 | --      | --  | --      |  |     |
| 3018509 | DUS4L         | NM_181581    | 14.514121 | 0.12497801  | 0.7420901  | 0        | --      | --  | --      |  | Yes |
| 3037535 | ZNF12         | NM_016265    | 12.074435 | 0.124701987 | 0.7521079  | 0        | --      | --  | --      |  |     |
| 3959613 | FLJ23322      | NM_024955    | 15.843704 | 0.124607963 | -0.7545887 | 8.84E-18 | 1.9E-03 | 1.4 | 4.2E-04 |  |     |
| 2366753 | SCYL1BP1      | NM_152281    | 14.208005 | 0.124549374 | 0.7437502  | 0        | --      | --  | --      |  |     |
| 2788195 | HSHIN1        | NM_199324    | 26.082002 | 0.124260702 | 0.6946358  | 3.11E-14 | --      | --  | --      |  |     |



|         |               |                 |           |             |            |          |         |     |         |     |
|---------|---------------|-----------------|-----------|-------------|------------|----------|---------|-----|---------|-----|
| 2432647 | POLR3C        | NM_006468       | 14.569286 | 0.123735228 | 0.6696613  | 5.33E-13 | 9.9E-01 | 1.1 | 1.4E-07 |     |
| 2720181 | MED28         | NM_025205       | 13.965825 | 0.123665962 | 0.7088663  | 5.33E-15 | --      | --  | --      |     |
| 2801608 |               | 6-Mar NM_005885 | 15.676515 | 0.123094279 | 0.6867092  | 7.90E-14 | 4.9E-02 | 1.3 | 1.4E-04 |     |
| 2462329 | ERO1LB        | NM_019891       | 27.013825 | 0.122784458 | 0.6898454  | 5.48E-14 | 5.2E-04 | 1.3 | 1.5E-02 |     |
| 2781813 | ELOVL6        | NM_024090       | 22.229001 | 0.122300396 | 0.6435691  | 7.85E-12 | --      | --  | --      |     |
| 3089401 | PPP3CC        | NM_005605       | 18.624681 | 0.122170046 | 0.6999498  | 1.64E-14 | 4.4E-04 | 1.6 | 1.4E-02 |     |
| 2428855 | AP4B1         | NM_006594       | 17.846305 | 0.12209437  | 0.7038938  | 1.02E-14 | 3.8E-04 | 1.3 | 1.2E-03 |     |
| 2806231 | BXDC2         | NM_018321       | 13.007637 | 0.121624907 | 0.7335496  | 2.22E-16 | --      | --  | --      |     |
| 2820925 | RHOBTB3       | NM_014899       | 17.311957 | 0.121262503 | 0.6551347  | 2.46E-12 | --      | --  | --      |     |
| 3820310 | FLJ11286      | NM_018381       | 13.318289 | 0.121053352 | -0.7400035 | 7.91E-17 | 2.5E-11 | 1.5 | 4.4E-07 |     |
| 2456805 | EPRS          | NM_004446       | 12.099551 | 0.120485635 | 0.7512696  | 0        | --      | --  | --      |     |
| 2520291 | GLS           | NM_014905       | 28.257896 | 0.120417687 | 0.5653575  | 6.42E-09 | 2.0E-02 | 1.9 | 1.3E-49 |     |
| 2912889 | SMAP1         | NM_021940       | 21.466645 | 0.120275132 | 0.6233666  | 5.31E-11 | --      | --  | --      |     |
| 2832052 | HARSL         | NM_012208       | 11.466597 | 0.119448693 | 0.7203961  | 1.33E-15 | 1.0E+00 | 1.1 | 3.6E-18 |     |
| 3114878 | C8orf36       | NM_173685       | 15.558506 | 0.119424039 | 0.6708358  | 4.69E-13 | --      | --  | --      |     |
| 2944068 | DEK           | NM_003472       | 13.779109 | 0.119394364 | 0.69254    | 4.00E-14 | --      | --  | --      |     |
| 2633917 | RG9MTD1       | NM_017819       | 19.691521 | 0.119379735 | 0.7417578  | 0        | --      | --  | --      |     |
| 2888243 | KIAA1191      | NM_020444       | 15.172481 | 0.118954035 | 0.7521268  | 0        | --      | --  | --      |     |
| 2534456 | LRRFIP1       | NM_004735       | 17.540939 | 0.118940993 | 0.7344728  | 2.22E-16 | --      | --  | --      |     |
| 2696252 | RYK           | NM_002958       | 13.930189 | 0.118605478 | 0.6725747  | 3.88E-13 | 2.0E-01 | 1.3 | 1.8E-06 |     |
| 2813481 | CDK7          | NM_001799       | 13.185968 | 0.118401177 | 0.7512697  | 0        | --      | --  | --      |     |
| 2785282 | FLJ30655      | NM_144643       | 25.03772  | 0.118189791 | 0.6511722  | 3.68E-12 | --      | --  | --      |     |
| 2669184 | LRRFIP2       | NM_006309       | 21.582627 | 0.118155892 | 0.6807026  | 1.57E-13 | --      | --  | --      |     |
| 2553576 | RTN4          | NM_207521       | 23.010958 | 0.117669595 | 0.6208911  | 6.65E-11 | 1.8E-02 | 1.4 | 7.0E-08 |     |
| 2709486 | RFC4          | NM_181573       | 18.841098 | 0.1170117   | 0.619468   | 7.56E-11 | --      | --  | --      |     |
| 2757319 | SLBP          | NM_006527       | 11.597532 | 0.116707846 | 0.6889856  | 6.06E-14 | --      | --  | --      | Yes |
| 2330133 | EIF2C3        | NM_024852       | 11.692816 | 0.116012692 | 0.7223609  | 8.88E-16 | --      | --  | --      |     |
| 2966078 | FBXL4         | NM_012160       | 13.499696 | 0.11573087  | 0.7430114  | 0        | --      | --  | --      |     |
| 2870889 | LOC389473     | XM_499269       | 10.891512 | 0.115426316 | 0.758607   | 0        | 1.0E+00 | 1.2 | 3.5E-10 |     |
| 2883380 | CRSP9         | NM_004270       | 14.907594 | 0.114410669 | 0.6841179  | 1.07E-13 | --      | --  | --      |     |
| 2770242 | PPAT          | NM_002703       | 12.475735 | 0.114156587 | 0.7373173  | 0        | --      | --  | --      |     |
| 2724338 | LIAS          | NM_194451       | 12.235869 | 0.11357219  | 0.7491272  | 0        | --      | --  | --      |     |
| 2436576 | C1orf43       | NM_015449       | 17.297467 | 0.1127789   | 0.6296154  | 2.98E-11 | --      | --  | --      |     |
| 2709062 | SFRS10        | NM_004593       | 14.335343 | 0.112089331 | 0.6193988  | 7.61E-11 | --      | --  | --      | Yes |
| 2832081 | ZMAT2         | NM_144723       | 12.955658 | 0.111741207 | 0.7388655  | 0        | --      | --  | --      |     |
| 2897635 | CDKAL1        | NM_017774       | 12.546085 | 0.111608232 | 0.6831444  | 1.19E-13 | --      | --  | --      |     |
| 2828115 | LOC90624      | NM_181705       | 17.566021 | 0.110884592 | 0.6783083  | 2.06E-13 | --      | --  | --      |     |
| 2654394 | FXR1          | NM_001013439    | 11.526886 | 0.11054006  | 0.7263625  | 4.44E-16 | --      | --  | --      |     |
| 2488732 | CCT7          | NM_001009570    | 12.224751 | 0.109057533 | 0.5585911  | 1.06E-08 | --      | --  | --      |     |
| 2566645 | LOC129531     | NM_138798       | 13.061001 | 0.108923811 | 0.6658417  | 8.04E-13 | --      | --  | --      |     |
| 2964231 | RRAGD         | NM_021244       | 18.658033 | 0.10874313  | 0.6567234  | 2.09E-12 | --      | --  | --      |     |
| 2714230 | PCGF3         | NM_006315       | 11.10592  | 0.108222477 | 0.734179   | 2.22E-16 | --      | --  | --      |     |
| 2464005 | AKT3          | NM_181690       | 17.900769 | 0.1080458   | 0.6973889  | 2.22E-14 | 2.6E-05 | 1.8 | 9.6E-02 |     |
| 2866045 | MGC33214      | NM_153354       | 13.524179 | 0.108025269 | 0.6852913  | 9.33E-14 | --      | --  | --      |     |
| 3899173 | RRBP1         | NM_004587       | 15.590513 | 0.107983092 | -0.7260107 | 5.67E-16 | 5.9E-17 | 1.4 | 4.1E-08 |     |
| 2529782 | MRPL44        | NM_022915       | 12.745497 | 0.107877935 | 0.7429383  | 0        | --      | --  | --      | Yes |
| 2731757 | THAP6         | NM_144721       | 14.874825 | 0.107025257 | 0.7342923  | 2.22E-16 | --      | --  | --      |     |
| 2754371 | FLJ33167      | NM_152683       | 17.049107 | 0.106668271 | 0.6341161  | 1.95E-11 | --      | --  | --      |     |
| 2611122 | TSEN2         | NM_025265       | 11.007922 | 0.106629015 | 0.6644746  | 9.29E-13 | 1.0E-01 | 1.3 | 1.5E-03 | Yes |
| 2961816 | PHIP          | NM_017934       | 15.415133 | 0.106330014 | 0.6732724  | 3.59E-13 | 3.3E-02 | 1.4 | 1.2E-03 |     |
| 3047202 | DKFZp68611569 | CR749225        | 18.887966 | 0.106316575 | 0.6858168  | 8.75E-14 | --      | --  | --      |     |
| 2971564 | C6orf204      | NM_206921       | 10.733457 | 0.105344964 | 0.7244412  | 6.66E-16 | --      | --  | --      |     |
| 2677653 | RAP140        | NM_015224       | 14.183326 | 0.105124171 | 0.6514203  | 3.59E-12 | --      | --  | --      |     |
| 2429069 | TRIM33        | NM_015906       | 10.736112 | 0.104326149 | 0.6925709  | 3.97E-14 | --      | --  | --      |     |
| 3034449 | WDR60         | NM_018051       | 12.610838 | 0.103937411 | 0.7400501  | 0        | --      | --  | --      |     |
| 2515369 | HAT1          | NM_003642       | 19.602714 | 0.103036887 | 0.6025489  | 3.32E-10 | 9.8E-03 | 1.6 | 2.1E-05 |     |
| 3893673 | SLC2A4RG      | NM_020062       | 15.201384 | 0.102961172 | -0.7302113 | 3.18E-16 | 3.8E-15 | 1.4 | 4.8E-10 |     |
| 2342176 | FPGT          | NM_003838       | 11.870361 | 0.102924069 | 0.6949437  | 3.00E-14 | --      | --  | --      |     |
| 3757630 | GCN5L2        | NM_021078       | 10.915678 | 0.10180445  | -0.7306983 | 2.97E-16 | 6.8E-06 | 1.3 | 1.1E-01 |     |
| 2484358 | REL           | NM_002908       | 15.594575 | 0.101720918 | 0.7326207  | 2.22E-16 | --      | --  | --      |     |
| 2383524 | ZNF678        | NM_178549       | 13.227568 | 0.101599552 | 0.708808   | 5.33E-15 | --      | --  | --      |     |
| 3041550 |               | ---             | 12.130613 | 0.100881244 | 0.7012728  | 1.38E-14 | --      | --  | --      |     |
| 2690850 | TMEM39A       | NM_018266       | 11.550184 | 0.099079379 | 0.6895051  | 5.71E-14 | --      | --  | --      |     |
| 2832315 | PCDHB4        | NM_018938       | 14.300698 | 0.098386867 | 0.7177142  | 1.78E-15 | 1.7E-01 | 1.8 | 1.3E-05 |     |
| 3082531 | LOC388578     | XM_371206       | 11.7992   | 0.096922928 | 0.7109104  | 4.22E-15 | 3.7E-01 | 1.3 | 2.8E-04 |     |
| 3101765 | FLJ11267      | NM_019607       | 12.508296 | 0.095818573 | 0.7103919  | 4.44E-15 | --      | --  | --      |     |
| 2532793 | APG16L        | NM_198890       | 18.118203 | 0.094509018 | 0.6723338  | 3.98E-13 | --      | --  | --      |     |
| 3091000 | BNIP3L        | NM_004331       | 11.581138 | 0.094418107 | 0.6804422  | 1.62E-13 | 1.8E-03 | 1.5 | 1.5E-06 |     |
| 2410330 | GPBP1L1       | NM_021639       | 12.22059  | 0.093957707 | 0.699289   | 1.78E-14 | 3.5E-01 | 1.3 | 9.2E-04 |     |
| 2639309 | SEC22L2       | NM_012430       | 11.443741 | 0.093923795 | 0.6622186  | 1.18E-12 | --      | --  | --      |     |
| 3025291 | FLJ32786      | NM_144648       | 12.760329 | 0.093839626 | 0.6736689  | 3.44E-13 | 2.4E-03 | 1.3 | 3.1E-04 |     |
| 2769182 | SCFD2         | NM_152540       | 11.437065 | 0.093801178 | 0.7178092  | 1.78E-15 | --      | --  | --      |     |
| 2673684 | IHPK2         | NM_001005910    | 10.08743  | 0.093706037 | 0.6118826  | 1.48E-10 | 1.4E-02 | 1.5 | 6.4E-04 |     |
| 3816112 | SCAMP4        | NM_079834       | 12.451634 | 0.093424749 | -0.7104444 | 4.42E-15 | 4.2E-07 | 1.5 | 1.3E-01 |     |
| 2864237 | HOMER1        | NM_004272       | 10.582602 | 0.093366379 | 0.7024921  | 1.20E-14 | 1.3E-02 | 1.3 | 1.6E-04 |     |
| 2622359 | RBM6          | NM_005777       | 8.7221937 | 0.093119882 | 0.7385537  | 0        | --      | --  | --      | Yes |
| 3601348 | LOXL1         | NM_005576       | 21.653851 | 0.092989487 | -0.6476994 | 5.22E-12 | 2.4E-10 | 1.6 | 1.9E-13 |     |
| 3015178 | ZNF38         | NM_145914       | 9.215537  | 0.091942232 | 0.7029612  | 1.13E-14 | 1.0E+00 | 1.1 | 1.9E-10 |     |
| 3663074 | MMP15         | NM_002428       | 17.196711 | 0.091777723 | -0.7179503 | 1.67E-15 | 2.0E-05 | 1.3 | 2.5E-06 |     |
| 2889753 | ZNF354A       | NM_005649       | 8.4198169 | 0.091550434 | 0.7426159  | 0        | --      | --  | --      |     |
| 2334404 | AKR1A1        | NM_006066       | 10.553209 | 0.091415442 | 0.6409895  | 1.01E-11 | 5.0E-03 | 1.3 | 3.6E-14 |     |

|         |              |              |           |             |            |          |         |     |         |     |
|---------|--------------|--------------|-----------|-------------|------------|----------|---------|-----|---------|-----|
| 2638017 | C3orf1       | NM_016589    | 31.295617 | 0.09032756  | 0.5768444  | 2.67E-09 | --      | --  | --      | --  |
| 3944690 | PSCD4        | NM_013385    | 11.476839 | 0.090106645 | -0.7347658 | 1.68E-16 | 7.6E-10 | 1.2 | 3.0E-04 |     |
| 2643530 | Cep63        | NM_025180    | 11.309284 | 0.089553854 | 0.7196384  | 1.33E-15 | --      | --  | --      |     |
| 2821417 | LNPEP        | NM_005575    | 20.326017 | 0.089005452 | 0.6582643  | 1.78E-12 | --      | --  | --      |     |
| 2382781 | SRP9         | NM_003133    | 8.9393966 | 0.088866569 | 0.7292968  | 4.44E-16 | 9.5E-01 | 1.3 | 2.6E-05 |     |
| 2446447 | ACBD6        | NM_032360    | 12.132013 | 0.088675699 | 0.7012445  | 1.40E-14 | --      | --  | --      |     |
| 2727976 | CEP4         | NM_025009    | 16.376684 | 0.088072101 | 0.6682052  | 6.24E-13 | 4.5E-04 | 1.4 | 3.5E-03 |     |
| 2611211 | MKRN2        | NM_014160    | 8.1992348 | 0.087784452 | 0.7299925  | 4.44E-16 | --      | --  | --      |     |
| 3935232 | C21orf56     | NM_032261    | 15.249113 | 0.087596111 | -0.6875285 | 7.19E-14 | 1.8E-04 | 1.4 | 1.0E+00 |     |
| 2519294 | KIAA1946     | NM_177454    | 10.207512 | 0.087397287 | 0.6636305  | 1.02E-12 | 1.2E-04 | 1.9 | 3.0E-01 |     |
| 3766415 | SMARCD2      | NM_003077    | 34.952538 | 0.087244961 | -0.6457707 | 6.32E-12 | 1.0E-06 | 1.2 | 1.1E-02 |     |
| 2405364 | AK2          | NM_001625    | 14.485198 | 0.08694685  | 0.7221329  | 8.88E-16 | 1.9E-02 | 1.3 | 5.8E-07 |     |
| 2898452 | MRS2L        | NM_020662    | 8.5273701 | 0.085829257 | 0.7175404  | 1.78E-15 | 2.3E-01 | 1.2 | 2.2E-07 |     |
| 2341565 | SFRS11       | NM_004768    | 8.5219958 | 0.085752755 | 0.6749214  | 3.00E-13 | --      | --  | --      | Yes |
| 3873480 | SNPH         | NM_014723    | 14.266935 | 0.085390541 | -0.6987662 | 1.89E-14 | 1.5E-09 | 1.4 | 3.5E-03 |     |
| 2843855 | ZFP2         | NM_030613    | 8.9620017 | 0.085299096 | 0.7211584  | 1.11E-15 | --      | --  | --      |     |
| 2515183 | FLJ13096     | NM_025000    | 9.0315033 | 0.085083762 | 0.6943327  | 3.24E-14 | --      | --  | --      |     |
| 3871127 | TNNI3        | NM_000363    | 12.93671  | 0.084700601 | -0.7227317 | 8.84E-16 | --      | --  | --      |     |
| 2713837 | ZNF679       | NM_153363    | 8.6370904 | 0.084375576 | 0.7214072  | 1.11E-15 | --      | --  | --      |     |
| 3871256 | KIAA1115     | NM_014931    | 11.763227 | 0.083893279 | -0.7077091 | 6.25E-15 | 1.8E-04 | 1.2 | 3.6E-02 |     |
| 2349345 | AMY2B        | NM_020978    | 10.764585 | 0.082430084 | 0.699637   | 1.69E-14 | --      | --  | --      |     |
| 2745646 | SMARCA5      | NM_003601    | 23.80416  | 0.081991383 | 0.6183218  | 8.38E-11 | 2.3E-02 | 1.4 | 1.4E-05 |     |
| 2515276 | DNCI2        | NM_001378    | 9.4206762 | 0.081905774 | 0.7423157  | 0        | 1.0E+00 | 1.2 | 1.9E-05 |     |
| 2953435 | C6orf130     | NM_145063    | 14.147837 | 0.080951751 | 0.578283   | 2.39E-09 | --      | --  | --      |     |
| 3459604 | PPM1H        | XM_350880    | 12.572246 | 0.080595554 | -0.7349948 | 1.62E-16 | 4.5E-08 | 1.3 | 1.8E-02 |     |
| 2394784 | FLJ23323     | NM_024654    | 8.9130318 | 0.080536818 | 0.7044962  | 9.33E-15 | --      | --  | --      |     |
| 2577896 | MCM6         | NM_005915    | 9.1865793 | 0.080137678 | 0.6903092  | 5.20E-14 | --      | --  | --      |     |
| 3014904 | ZNF655       | NM_001009960 | 8.4993689 | 0.08009128  | 0.6488657  | 4.64E-12 | --      | --  | --      |     |
| 3067644 | THAP5        | NM_182529    | 8.4626353 | 0.079835372 | 0.7261489  | 4.44E-16 | --      | --  | --      |     |
| 2738466 | SCYE1        | NM_004757    | 8.4826929 | 0.07970821  | 0.7010098  | 1.44E-14 | --      | --  | --      |     |
| 2655387 | EIF2B5       | NM_003907    | 8.1585965 | 0.078316891 | 0.6876797  | 7.06E-14 | 1.0E+00 | 1.1 | 3.7E-05 |     |
| 3003107 | FLJ39963     | NM_182633    | 8.7921398 | 0.07786524  | 0.7360603  | 0        | --      | --  | --      |     |
| 2514563 | KLHL23       | NM_144711    | 9.712807  | 0.07771265  | 0.6657685  | 8.10E-13 | --      | --  | --      |     |
| 3662417 | CETP         | NM_000078    | 11.667139 | 0.077562264 | -0.7092387 | 5.15E-15 | 7.7E-05 | 1.1 | 7.9E-03 |     |
| 2511432 | GPD2         | NM_000408    | 10.887342 | 0.077204722 | 0.6495708  | 4.33E-12 | 5.4E-05 | 2.1 | 1.1E-04 |     |
| 2687739 | CD47         | NM_198793    | 14.683442 | 0.076454095 | 0.5572849  | 1.16E-08 | 2.3E-05 | 1.9 | 1.4E-02 |     |
| 2500919 | SLC20A1      | NM_005415    | 8.9944442 | 0.075631274 | 0.7132781  | 3.11E-15 | 2.6E-03 | 1.3 | 1.3E-06 |     |
| 2425118 | SAS-6        | NM_194292    | 8.8906989 | 0.074584825 | 0.6854023  | 9.19E-14 | --      | --  | --      |     |
| 3085874 | MTMR9        | NM_015458    | 13.859849 | 0.074373646 | 0.5847286  | 1.44E-09 | 1.2E-01 | 1.3 | 6.5E-04 |     |
| 2358906 | PSMB4        | NM_002796    | 8.8523773 | 0.073893087 | 0.5028633  | 4.40E-07 | --      | --  | --      |     |
| 2796790 | KIAA1430     | AK091993     | 6.8124175 | 0.072735752 | 0.6817124  | 1.40E-13 | --      | --  | --      |     |
| 2899506 | HMGN4        | NM_006353    | 7.5868643 | 0.072148541 | 0.6935219  | 3.55E-14 | --      | --  | --      |     |
| 3063368 | DKFZp727G131 | AK024526     | 8.7009243 | 0.071064664 | 0.7098038  | 4.88E-15 | --      | --  | --      |     |
| 2574884 | FLJ10006     | NM_017969    | 8.6164496 | 0.070238561 | 0.7190881  | 1.33E-15 | --      | --  | --      |     |
| 3866135 | PRKD2        | NM_016457    | 18.219721 | 0.070155115 | -0.604381  | 2.84E-10 | 4.7E-08 | 1.3 | 6.4E-08 |     |
| 2435195 | MRPL9        | NM_031420    | 9.0434371 | 0.070048787 | 0.4853833  | 1.24E-06 | --      | --  | --      |     |
| 3012019 | CLDN12       | NM_012129    | 13.874561 | 0.06965928  | 0.6344343  | 1.90E-11 | --      | --  | --      |     |
| 3027808 | MULK         | NM_018238    | 10.354228 | 0.069633524 | 0.69961    | 1.71E-14 | 5.8E-02 | 1.4 | 1.0E-03 |     |
| 2748061 | TRIM2        | NM_015271    | 12.97454  | 0.069582396 | 0.4872068  | 1.12E-06 | 7.8E-04 | 1.5 | 2.8E-02 |     |
| 2817793 | UNQ9217      | NM_205548    | 9.8927304 | 0.069091505 | 0.6952477  | 2.89E-14 | --      | --  | --      |     |
| 2713192 | LOC391609    | XM_497952    | 7.1251408 | 0.068877721 | 0.7001109  | 1.60E-14 | 1.2E-01 | 1.7 | 1.2E-17 |     |
| 3968303 | APXL         | NM_001649    | 8.6733131 | 0.068117006 | -0.6857877 | 8.79E-14 | 1.6E-09 | 1.8 | 9.3E-09 |     |
| 2409069 | CCDC23       | NM_199342    | 7.5497439 | 0.067213193 | 0.6372688  | 1.45E-11 | --      | --  | --      |     |
| 3103494 | FLJ20533     | NM_017866    | 6.896827  | 0.066644493 | 0.6751581  | 2.92E-13 | 2.3E-02 | 1.7 | 7.8E-05 |     |
| 2409904 | EIF2B3       | NM_020365    | 7.4483669 | 0.066395265 | 0.6772426  | 2.32E-13 | --      | --  | --      |     |
| 2963784 | C6orf166     | NM_018064    | 7.1518637 | 0.066360181 | 0.698438   | 1.95E-14 | --      | --  | --      |     |
| 2915357 | RWDD2        | NM_033411    | 9.4696698 | 0.066253042 | 0.6687671  | 5.87E-13 | --      | --  | --      |     |
| 2690776 | B4GALT4      | NM_212543    | 8.5620037 | 0.066183347 | 0.7099441  | 4.66E-15 | --      | --  | --      |     |
| 2559696 | CGI-121      | NM_016058    | 6.5320534 | 0.066159393 | 0.6920702  | 4.22E-14 | --      | --  | --      |     |
| 2562685 | IMMT         | NM_006839    | 9.150958  | 0.065913571 | 0.591958   | 8.01E-10 | --      | --  | --      |     |
| 2363424 | UFC1         | NM_016406    | 9.3751248 | 0.065821728 | 0.6130409  | 1.34E-10 | --      | --  | --      |     |
| 2655773 | POLR2H       | NM_006232    | 9.9291075 | 0.065476719 | 0.5561058  | 1.27E-08 | --      | --  | --      |     |
| 2715749 | GRK4         | NM_001004057 | 7.629047  | 0.064989551 | 0.6337897  | 2.02E-11 | --      | --  | --      |     |
| 2887633 | FAM44B       | NM_138369    | 6.6902988 | 0.064438009 | 0.5800543  | 2.08E-09 | --      | --  | --      |     |
| 2674179 | USP4         | NM_199443    | 7.6160592 | 0.064358832 | 0.6175173  | 9.01E-11 | --      | --  | --      |     |
| 2635998 | TAGLN3       | NM_001008272 | 7.8792806 | 0.064116889 | 0.6236859  | 5.16E-11 | 1.2E-04 | 1.5 | 5.7E-02 |     |
| 2978026 | FBXO30       | NM_032145    | 13.911642 | 0.063793754 | 0.5434124  | 3.12E-08 | 4.9E-01 | 1.5 | 1.1E-03 |     |
| 2768654 | OCCIAD2      | NM_001014446 | 7.1914659 | 0.063646067 | 0.635492   | 1.71E-11 | --      | --  | --      |     |
| 2460487 | C1orf131     | NM_152379    | 7.6076671 | 0.063350677 | 0.6640872  | 9.68E-13 | --      | --  | --      |     |
| 2649113 | TIPARP       | NM_015508    | 11.704279 | 0.063308704 | 0.6010516  | 3.76E-10 | --      | --  | --      |     |
| 3053380 | ZNF117       | NM_024498    | 8.3946057 | 0.063298016 | 0.6436889  | 7.76E-12 | --      | --  | --      |     |
| 3585905 | APBA2        | NM_005503    | 11.804983 | 0.063260129 | -0.6493096 | 4.44E-12 | 3.9E-07 | 1.4 | 6.3E-03 |     |
| 2871801 | FEM1C        | NM_020177    | 7.1060886 | 0.062497898 | 0.7086735  | 5.55E-15 | 7.4E-01 | 1.2 | 6.0E-06 |     |
| 2451463 | ADIPOR1      | NM_015999    | 16.791684 | 0.062459585 | 0.6111419  | 1.58E-10 | --      | --  | --      |     |
| 2465182 | TFB2M        | NM_022366    | 6.908683  | 0.062225051 | 0.6369016  | 1.50E-11 | --      | --  | --      | Yes |
| 3243846 | RET          | NM_020975    | 6.8952306 | 0.062087237 | -0.692618  | 3.96E-14 | 1.3E-03 | 1.3 | 6.0E-02 |     |
| 2382419 | CNIH4        | NM_014184    | 7.7373509 | 0.062030127 | 0.6402284  | 1.09E-11 | --      | --  | --      |     |
| 2572601 | FLJ10996     | NM_019044    | 7.1335657 | 0.061153284 | 0.6867798  | 7.84E-14 | --      | --  | --      |     |
| 2336497 | ZYG11B       | NM_024646    | 8.9037726 | 0.061083266 | 0.541057   | 3.68E-08 | --      | --  | --      |     |
| 3636169 | RPS17        | NM_001021    | 7.193434  | 0.060628059 | -0.691092  | 4.74E-14 | 2.2E-12 | 1.4 | 3.0E-02 |     |
| 3056414 | RFC2         | NM_002914    | 6.9941648 | 0.060348081 | 0.4823546  | 1.48E-06 | --      | --  | --      |     |

|         |           |              |           |             |            |           |         |     |         |     |
|---------|-----------|--------------|-----------|-------------|------------|-----------|---------|-----|---------|-----|
| 2319802 | PGD       | NM_002631    | 6.2730168 | 0.060252936 | 0.6494159  | 4.39E-12  | 1.9E-01 | 1.1 | 1.9E-03 |     |
| 2582979 | WDSUB1    | NM_152528    | 12.441362 | 0.059579075 | 0.5728221  | 3.65E-09  | --      | --  | --      |     |
| 2437577 | YY1AP1    | NM_018253    | 9.147798  | 0.059345651 | 0.6053447  | 2.61E-10  | --      | --  | --      |     |
| 3200040 | BNC2      | NM_017637    | 9.1778114 | 0.05911574  | -0.6984205 | 1.97E-14  | --      | --  | --      |     |
| 2957462 | GSTA4     | NM_001512    | 6.1166502 | 0.058880111 | 0.6922183  | 4.15E-14  | --      | --  | --      |     |
| 2403335 | EYA3      | NM_001990    | 8.0794496 | 0.05854595  | 0.6184781  | 8.26E-11  | 1.6E-01 | 1.2 | 4.0E-04 |     |
| 2919927 | C6orf203  | NM_016487    | 6.9777442 | 0.058053968 | 0.6516541  | 3.51E-12  | --      | --  | --      |     |
| 2669157 | EPM2AIP1  | NM_014805    | 8.1249864 | 0.057648643 | 0.6209399  | 6.62E-11  | --      | --  | --      |     |
| 2877141 | HNRPA0    | NM_006805    | 5.4356856 | 0.057633867 | 0.6064637  | 2.37E-10  | --      | --  | --      | Yes |
| 3883013 | TP53NP2   | NM_021202    | 7.57088   | 0.057359684 | -0.678432  | 2.03E-13  | 3.5E-08 | 1.4 | 4.7E-01 |     |
| 2967321 | PREP      | NM_002726    | 9.6110822 | 0.057212252 | 0.5592426  | 1.01E-08  | --      | --  | --      |     |
| 2651165 | SERPINI1  | NM_005025    | 11.057286 | 0.056782958 | 0.6141561  | 1.21E-10  | --      | --  | --      |     |
| 2840425 | RANBP17   | NM_022897    | 6.4793716 | 0.056612654 | 0.6509561  | 3.76E-12  | 1.7E-02 | 1.7 | 3.1E-11 |     |
| 2761321 | FAM44A    | NM_148894    | 6.9524796 | 0.056441733 | 0.6499774  | 4.15E-12  | 1.0E+00 | 1.1 | 1.7E-03 |     |
| 2958670 | RAB23     | NM_183227    | 6.4121448 | 0.056418126 | 0.6676351  | 6.63E-13  | --      | --  | --      |     |
| 2358761 | PSMD4     | NM_002810    | 6.8298482 | 0.055682184 | 0.6929824  | 3.77E-14  | 7.6E-02 | 1.2 | 1.8E-05 |     |
| 2707764 | RP42      | NM_020640    | 7.155417  | 0.055503399 | 0.5545827  | 1.42E-08  | --      | --  | --      |     |
| 2966193 | C6orf168  | NM_032511    | 11.306527 | 0.054824397 | 0.5880173  | 1.10E-09  | --      | --  | --      |     |
| 2407729 | RRAGC     | NM_022157    | 6.7847441 | 0.054500397 | 0.6621797  | 1.18E-12  | --      | --  | --      | Yes |
| 2844082 | RUFY1     | NM_025158    | 9.8599858 | 0.054008683 | 0.5159087  | 1.95E-07  | --      | --  | --      |     |
| 2829542 | FLJ37562  | NM_152409    | 9.6873219 | 0.053935733 | 0.5951733  | 6.15E-10  | --      | --  | --      |     |
| 2876011 | SKP1A     | NM_006930    | 6.7553338 | 0.05341002  | 0.6933752  | 3.62E-14  | 7.5E-01 | 1.4 | 1.5E-04 |     |
| 3770799 | CASKIN2   | NM_020753    | 17.424701 | 0.053078781 | -0.603101  | 3.16E-10  | --      | --  | --      |     |
| 3333668 | LOC374395 | NM_199337    | 9.9585861 | 0.052224546 | -0.6067264 | 2.32E-10  | 1.8E-06 | 1.5 | 2.0E-06 |     |
| 2443537 | SCYL3     | NM_020423    | 5.6564841 | 0.051907834 | 0.6764499  | 2.53E-13  | --      | --  | --      |     |
| 3273667 | ADARB2    | NM_018702    | 7.3307512 | 0.05150445  | -0.6582378 | 1.79E-12  | 2.3E-11 | 1.5 | 2.6E-06 | Yes |
| 2334459 | LOC441371 | XM_496987    | 5.1228636 | 0.051487026 | 0.6735858  | 3.47E-13  | --      | --  | --      |     |
| 3949722 | FAM19A5   | NM_015381    | 19.213026 | 0.051431765 | -0.6012399 | 3.70E-10  | 3.1E-14 | 1.8 | 2.0E-01 |     |
| 3113456 | MTBP      | NM_022045    | 6.7140047 | 0.051414549 | 0.6757664  | 2.73E-13  | --      | --  | --      |     |
| 2523689 | ABI2      | NM_005759    | 13.75688  | 0.051259984 | 0.5819925  | 1.79E-09  | 2.8E-04 | 1.6 | 2.4E-05 |     |
| 2522014 | FLJ22555  | NM_024520    | 6.1006199 | 0.051213785 | 0.6993958  | 1.75E-14  | --      | --  | --      |     |
| 2886977 | FBXW11    | NM_033645    | 7.6205528 | 0.051008716 | 0.6277647  | 3.54E-11  | 1.0E+00 | 1.3 | 6.8E-12 |     |
| 2774565 | LOC440280 | XM_496071    | 6.1498024 | 0.050450683 | 0.6651257  | 8.67E-13  | --      | --  | --      |     |
| 2510884 | ARL6IP6   | NM_152522    | 7.1543278 | 0.050150839 | 0.5805863  | 1.99E-09  | --      | --  | --      |     |
| 2708229 | PSARL     | NM_018622    | 6.6438304 | 0.049903017 | 0.4834099  | 1.39E-06  | --      | --  | --      |     |
| 2417174 | PAI-RBP1  | NM_015640    | 5.2098559 | 0.049664581 | 0.6311086  | 2.59E-11  | --      | --  | --      |     |
| 2544012 | KIAA1240  | XM_039676    | 6.0349025 | 0.049515658 | 0.6930087  | 3.77E-14  | --      | --  | --      |     |
| 3114064 | WDR67     | NM_145647    | 8.527209  | 0.049420869 | 0.5825637  | 1.71E-09  | 2.4E-06 | 1.4 | 3.5E-14 |     |
| 2617796 | ENDOGL1   | NM_005107    | 4.7991414 | 0.048313588 | 0.6763971  | 2.54E-13  | --      | --  | --      |     |
| 2836886 | MRPL22    | NM_014180    | 5.5746092 | 0.047916933 | 0.6032042  | 3.14E-10  | --      | --  | --      |     |
| 2446567 | STX6      | NM_005819    | 6.7804409 | 0.047727263 | 0.6120832  | 1.46E-10  | 1.7E-04 | 1.6 | 3.8E-05 |     |
| 3629652 | NOPE      | NM_020962    | 5.8474248 | 0.047639216 | -0.5658049 | 6.20E-09  | 6.4E-04 | 1.5 | 2.3E-05 |     |
| 3094447 | ASH2L     | NM_004674    | 8.5571485 | 0.047462485 | 0.5118579  | 2.52E-07  | --      | --  | --      |     |
| 2363919 | ATF6      | NM_007348    | 9.4308683 | 0.047373827 | 0.584248   | 1.49E-09  | --      | --  | --      |     |
| 2793310 | LOC389705 | XM_372076    | 5.9778538 | 0.047079817 | 0.6781513  | 2.09E-13  | --      | --  | --      |     |
| 2509557 | ACVR2A    | NM_001616    | 6.749819  | 0.046824922 | 0.6537872  | 2.82E-12  | 2.0E-03 | 1.4 | 2.6E-05 |     |
| 3023795 | KIAA0265  | NM_014997    | 11.992896 | 0.046666235 | 0.596553   | 5.48E-10  | --      | --  | --      |     |
| 2989269 | AD7C-NTP  | AF010144     | 4.2804309 | 0.046363775 | 0.6635693  | 1.02E-12  | --      | --  | --      |     |
| 3119735 | ZNF623    | NM_014789    | 6.5839009 | 0.045984724 | 0.6378248  | 1.37E-11  | --      | --  | --      |     |
| 2319340 | MGC4399   | NM_032315    | 12.331656 | 0.045944995 | 0.5824437  | 1.72E-09  | --      | --  | --      |     |
| 3338192 | CCND1     | NM_053056    | 12.371362 | 0.045597331 | -0.6373915 | 1.43E-11  | 4.8E-16 | 1.8 | 1.1E-16 |     |
| 3645901 | FLJ14154  | NM_024845    | 5.440638  | 0.045250053 | -0.6457097 | 6.36E-12  | --      | --  | --      |     |
| 2992998 | MGC72075  | NM_199136    | 5.9548467 | 0.045151206 | 0.6585797  | 1.73E-12  | --      | --  | --      |     |
| 2827525 | KDELC1    | NM_024089    | 7.2316941 | 0.044854846 | 0.6018843  | 3.51E-10  | 6.1E-03 | 1.7 | 6.9E-11 |     |
| 3015216 | COPS6     | NM_006833    | 5.9952306 | 0.044576419 | 0.3110434  | 0.0028454 | --      | --  | --      |     |
| 2403740 | SFRS4     | NM_005626    | 5.4901185 | 0.044244777 | 0.486566   | 1.16E-06  | --      | --  | --      | Yes |
| 3734479 | FLJ20255  | NM_017728    | 5.9257464 | 0.043673664 | -0.6580927 | 1.81E-12  | 2.2E-05 | 1.2 | 4.9E-02 |     |
| 2963407 | SYNCRIP   | NM_006372    | 5.1001404 | 0.043647013 | 0.5937366  | 6.92E-10  | 4.2E-01 | 1.2 | 1.8E-04 | Yes |
| 3037304 | MGC12966  | NM_032706    | 4.7913687 | 0.042412278 | 0.6503888  | 3.99E-12  | --      | --  | --      |     |
| 2644702 | FAIM      | NM_018147    | 5.8338512 | 0.042374234 | 0.5326681  | 6.51E-08  | --      | --  | --      |     |
| 2792420 | FLJ38482  | NM_152681    | 5.4926451 | 0.042216897 | 0.6862183  | 8.37E-14  | 1.0E+00 | 1.3 | 8.9E-05 |     |
| 2427500 | HBXIP     | NM_006402    | 6.3802789 | 0.041901951 | 0.5815184  | 1.85E-09  | --      | --  | --      |     |
| 2450416 | KIF14     | NM_014875    | 5.5173974 | 0.04095835  | 0.5626584  | 7.84E-09  | --      | --  | --      |     |
| 2738314 | FLJ13273  | NM_024751    | 5.7061572 | 0.040730549 | 0.6570496  | 2.02E-12  | --      | --  | --      |     |
| 3053691 | LOC401204 | XM_376416    | 4.7332413 | 0.040665188 | 0.5803619  | 2.03E-09  | --      | --  | --      |     |
| 2635641 | PVRL3     | NM_015480    | 6.9416819 | 0.040394821 | 0.5608221  | 8.98E-09  | 5.5E-01 | 1.4 | 3.4E-05 |     |
| 3644973 | PDPK1     | NM_031268    | 6.6130415 | 0.0402535   | -0.468763  | 3.16E-06  | --      | --  | --      |     |
| 3272566 | KNDC1     | NM_033404    | 9.226347  | 0.039734514 | -0.5291605 | 8.23E-08  | 1.8E-11 | 1.8 | 5.3E-17 |     |
| 2367793 | LOC338862 | XM_375029    | 4.062931  | 0.039205815 | 0.6599814  | 1.49E-12  | 1.0E+00 | 1.1 | 9.8E-04 |     |
| 2527939 | BCS1L     | NM_004328    | 4.2731605 | 0.039110175 | 0.6232658  | 5.36E-11  | --      | --  | --      |     |
| 2899437 | BTN2A1    | NM_007049    | 4.2146965 | 0.039016018 | 0.6667109  | 7.32E-13  | --      | --  | --      |     |
| 2832459 | PCDHB14   | NM_018934    | 4.7666589 | 0.038319286 | 0.5914977  | 8.32E-10  | --      | --  | --      |     |
| 2808612 | LOC441070 | NM_001013715 | 3.5681264 | 0.037576137 | 0.6290227  | 3.15E-11  | --      | --  | --      |     |
| 2545811 | PPM1G     | NM_177983    | 4.0307998 | 0.036334233 | 0.4779199  | 1.90E-06  | --      | --  | --      |     |
| 2520113 | INPP1     | NM_002194    | 10.135002 | 0.036034047 | 0.5409378  | 3.71E-08  | --      | --  | --      |     |
| 2981874 | TCTEL1    | NM_006519    | 5.2322512 | 0.034782416 | 0.4995887  | 5.36E-07  | --      | --  | --      |     |
| 2878726 | HDAC3     | NM_003883    | 3.4321105 | 0.033947191 | 0.5150303  | 2.06E-07  | --      | --  | --      |     |
| 2449619 | ZBTB41    | NM_194314    | 4.764423  | 0.033473742 | 0.4783808  | 1.85E-06  | --      | --  | --      |     |
| 2512790 | SLC4A10   | NM_022058    | 6.7945206 | 0.032815581 | 0.5048083  | 3.90E-07  | --      | --  | --      |     |
| 2521556 | MARS2     | NM_138395    | 3.7413887 | 0.032340249 | 0.6340261  | 1.97E-11  | --      | --  | --      |     |
| 2875634 | ZCCHC10   | NM_017665    | 3.3872532 | 0.032227486 | 0.6499638  | 4.16E-12  | --      | --  | --      |     |

|         |              |              |           |             |            |           |         |     |    |         |
|---------|--------------|--------------|-----------|-------------|------------|-----------|---------|-----|----|---------|
| 2464484 | LOC284702    | AK095297     | 5.7436911 | 0.031333188 | 0.552459   | 1.65E-08  | --      | --  | -- |         |
| 3073597 | CHCHD3       | NM_017812    | 3.7271718 | 0.031155577 | 0.5269834  | 9.51E-08  | --      | --  | -- |         |
| 3082503 | ZNF596       | NM_173539    | 3.3907641 | 0.030395802 | 0.6457838  | 6.31E-12  | --      | --  | -- |         |
| 2900497 | ZNF306       | NM_024493    | 6.1222867 | 0.029622617 | 0.6025326  | 3.32E-10  | --      | --  | -- |         |
| 3022814 | HIG2         | NM_013332    | 3.4872392 | 0.029313118 | 0.5813491  | 1.88E-09  | 1.7E-01 | 1.2 |    | 2.5E-05 |
| 2561955 | SUCLG1       | NM_003849    | 5.5915882 | 0.028764599 | 0.3942519  | 0.0001206 | --      | --  | -- |         |
| 2738723 | HADHSC       | NM_005327    | 4.9296194 | 0.027867521 | 0.4509119  | 8.20E-06  | 1.1E-03 | 1.4 |    | 7.1E-03 |
| 2337003 | MRPL37       | NM_016491    | 3.0408166 | 0.026002066 | 0.440091   | 1.42E-05  | 3.1E-01 | 1.1 |    | 2.1E-06 |
| 3888850 | BCAS4        | NM_001010974 | 4.0285659 | 0.025707088 | -0.6199825 | 7.22E-11  | --      | --  | -- |         |
| 2363525 | NDUFS2       | NM_004550    | 3.2472638 | 0.025575195 | 0.3945807  | 0.0001189 | --      | --  | -- |         |
| 2436716 | UBE2Q        | NM_017582    | 3.5263879 | 0.025512159 | 0.5088594  | 3.04E-07  | --      | --  | -- |         |
| 2405312 | IBRDC3       | NM_153341    | 5.6406361 | 0.024803004 | 0.4977121  | 6.01E-07  | --      | --  | -- |         |
| 2901352 | PPP1R11      | NM_021959    | 2.860281  | 0.024435889 | 0.3777752  | 0.0002418 | 9.1E-02 | 1.4 |    | 5.8E-04 |
| 2399765 | CAPZB        | NM_004930    | 16.014391 | 0.023784466 | 0.3455477  | 0.0008508 | 6.2E-04 | 1.4 |    | 4.2E-03 |
| 2500803 | TTL          | NM_153712    | 5.0628089 | 0.023476222 | 0.4238516  | 3.14E-05  | 3.6E-05 | 1.4 |    | 9.2E-01 |
| 2606574 | NDUFA10      | NM_004544    | 2.3408369 | 0.02121915  | 0.4845717  | 1.30E-06  | 3.1E-01 | 1.2 |    | 9.2E-04 |
| 2845879 | CRR9         | NM_030782    | 2.7343044 | 0.020740866 | 0.2526901  | 0.0162677 | --      | --  | -- |         |
| 2674168 | FLJ43654     | NM_198562    | 4.38986   | 0.020129238 | 0.4816626  | 1.54E-06  | --      | --  | -- |         |
| 2369110 | RASAL2       | NM_004841    | 3.399943  | 0.019254358 | 0.5254395  | 1.05E-07  | --      | --  | -- |         |
| 2336913 | LRRC42       | NM_052940    | 2.0094732 | 0.018436547 | 0.4167842  | 4.38E-05  | --      | --  | -- |         |
| 2907459 | TNRC5        | NM_183010    | 1.746791  | 0.014755773 | 0.3247311  | 0.001792  | --      | --  | -- |         |
| 2411799 | C1orf165     | NM_024603    | 1.6645914 | 0.014468685 | 0.4458026  | 1.07E-05  | --      | --  | -- |         |
| 3009299 | MDH2         | NM_005918    | 2.0002026 | 0.013884519 | 0.1388767  | 0.1917502 | 8.9E-01 | 1.2 |    | 5.8E-05 |
| 2360158 | HAX1         | NM_006118    | 1.6211673 | 0.013045843 | 0.4262712  | 2.80E-05  | --      | --  | -- |         |
| 2409613 | PRNPIP       | XM_290941    | 1.5627223 | 0.011642546 | 0.3417592  | 0.0009781 | --      | --  | -- |         |
| 2864449 | C5orf12      | NM_178276    | 2.7069734 | 0.011039709 | 0.4653969  | 3.80E-06  | --      | --  | -- |         |
| 2326496 | DHDDS        | NM_024887    | 2.6152739 | 0.009765762 | 0.2199131  | 0.0372799 | 2.1E-05 | 1.3 |    | 2.7E-06 |
| 3089853 | CHMP7        | NM_152272    | 1.1212346 | 0.009724068 | 0.3079001  | 0.0031547 | --      | --  | -- |         |
| 2649710 | DKFZp547E087 | AK128772     | 1.5781431 | 0.005590396 | 0.3942551  | 0.0001206 | --      | --  | -- |         |
| 2599345 | AAMP         | NM_001087    | 0.724029  | 0.00555083  | 0.1496175  | 0.1592817 | --      | --  | -- |         |

**Table S20. M41 (wheat2): mRNA metabolism module**

| Transcript ID | Symbol        | Accession    | kTotal    | kWithin-Connectivity | eigencorr  | eigenpval | 5-region ANOVA |          |         | Annotated w/ GO BP<br>"gene expression" or<br>"RNA metabolism"? |
|---------------|---------------|--------------|-----------|----------------------|------------|-----------|----------------|----------|---------|-----------------------------------------------------------------|
|               |               |              |           |                      |            |           | DEX            | FoldChng | DAS     |                                                                 |
| 3932148       | BRWD1         | NM_033656    | 52.052755 | 0.999999901          | 0.9345749  | 0         | 8.9E-02        | 1.2      | 2.9E-21 | Yes                                                             |
| 3347549       | CUL5          | NM_003478    | 52.531446 | 0.977265522          | 0.93209302 | 0         | --             | --       | --      |                                                                 |
| 3563922       | MAP4K5        | NM_006575    | 55.079817 | 0.97694571           | 0.93705411 | 0         | 5.5E-03        | 1.3      | 1.6E-06 |                                                                 |
| 3517594       | KIAA1008      | NM_014953    | 50.533202 | 0.937923381          | 0.9389625  | 0         | --             | --       | --      | Yes                                                             |
| 3145020       | DKFZP434116   | NM_183009    | 50.738691 | 0.912269842          | 0.92221761 | 0         | 5.4E-03        | 1.3      | 1.7E-04 |                                                                 |
| 3519119       | C13orf10      | NM_022118    | 47.616537 | 0.891933245          | 0.93310141 | 0         | --             | --       | --      |                                                                 |
| 3342525       | PCF11         | NM_015885    | 47.721181 | 0.880515684          | 0.92361758 | 0         | 1.9E-02        | 1.3      | 1.5E-03 | Yes                                                             |
| 3134922       | LOC115294     | NM_052937    | 55.755882 | 0.865794666          | 0.93201951 | 0         | --             | --       | --      |                                                                 |
| 3888133       | CSE1L         | NM_001316    | 48.558133 | 0.849053041          | 0.92414112 | 0         | 7.9E-02        | 1.2      | 2.1E-04 |                                                                 |
| 3345593       | PIG8          | NM_014679    | 45.191969 | 0.810352469          | 0.90310907 | 0         | 1.9E-03        | 1.2      | 1.6E-02 |                                                                 |
| 3537884       | ARID4A        | NM_023000    | 59.303867 | 0.795749152          | 0.92227739 | 0         | 5.5E-01        | 1.3      | 5.0E-08 | Yes                                                             |
| 3534128       | KIAA0423      | NM_015091    | 46.437385 | 0.793607046          | 0.90902312 | 0         | --             | --       | --      |                                                                 |
| 3320604       | USP47         | NM_017944    | 49.491928 | 0.787166211          | 0.90974236 | 0         | --             | --       | --      |                                                                 |
| 3257938       | BTAF1         | NM_003972    | 40.681416 | 0.786030344          | 0.90354922 | 0         | 2.4E-02        | 1.3      | 5.9E-07 | Yes                                                             |
| 3462094       | MGC23401      | NM_144982    | 40.36859  | 0.782637208          | 0.90251079 | 0         | --             | --       | --      |                                                                 |
| 3486883       | NARG1L        | NM_024561    | 39.241271 | 0.777253449          | 0.91373301 | 0         | --             | --       | --      | Yes                                                             |
| 3614087       | UBE3A         | NM_130838    | 38.603865 | 0.776198966          | 0.91809381 | 0         | 3.1E-02        | 1.3      | 1.1E-14 |                                                                 |
| 3480129       | ZNF198        | NM_003453    | 40.315181 | 0.760244615          | 0.89026283 | 0         | 3.2E-02        | 1.2      | 2.1E-04 | Yes                                                             |
| 3285552       | ZNF248        | NM_021045    | 41.317536 | 0.752712921          | 0.91206303 | 0         | --             | --       | --      | Yes                                                             |
| 3422215       | DKFZP564I0422 | NM_031435    | 42.825993 | 0.749596799          | 0.90799589 | 0         | 3.1E-04        | 1.4      | 3.7E-01 |                                                                 |
| 3800619       | LOC440487     | XM_496271    | 45.93283  | 0.74788607           | 0.90061765 | 0         | --             | --       | --      |                                                                 |
| 3661065       | RBL2          | NM_005611    | 44.641687 | 0.728688531          | 0.90709924 | 0         | --             | --       | --      | Yes                                                             |
| 3292634       | RUFY2         | NM_017987    | 45.718535 | 0.722863418          | 0.90216056 | 0         | --             | --       | --      |                                                                 |
| 3238491       | PCGF4         | NM_005180    | 44.811464 | 0.711972299          | 0.89594558 | 0         | 2.0E-04        | 1.5      | 5.5E-03 | Yes                                                             |
| 3829857       | ZNF302        | NM_001012320 | 40.026398 | 0.707996912          | 0.89614143 | 0         | --             | --       | --      | Yes                                                             |
| 3387413       | MGC33371      | NM_144664    | 41.670282 | 0.695477293          | 0.88015632 | 0         | 2.5E-05        | 1.3      | 6.2E-07 |                                                                 |
| 3927949       | ZNF294        | NM_015565    | 39.945861 | 0.691870027          | 0.88576779 | 0         | --             | --       | --      |                                                                 |
| 3717539       | RHOT1         | NM_018307    | 39.948839 | 0.689908217          | 0.9077642  | 0         | --             | --       | --      |                                                                 |
| 3484005       | C13orf22      | NM_005800    | 47.942976 | 0.685929636          | 0.89530618 | 0         | --             | --       | --      |                                                                 |
| 3882854       | ITCH          | NM_031483    | 32.768246 | 0.682863869          | 0.90631751 | 0         | 3.4E-01        | 1.2      | 4.0E-04 |                                                                 |
| 3439305       | ZNF84         | NM_003428    | 38.609362 | 0.681005283          | 0.87825562 | 0         | 1.8E-03        | 1.4      | 2.7E-01 | Yes                                                             |
| 3625823       | SUHW4         | NM_017661    | 41.138125 | 0.680959692          | 0.87147423 | 0         | --             | --       | --      | Yes                                                             |
| 3387771       | FLJ23518      | NM_024725    | 37.887004 | 0.677996709          | 0.88767385 | 0         | 1.9E-01        | 1.3      | 1.2E-03 |                                                                 |
| 3280224       | LOC388972     | XM_371511    | 42.201735 | 0.67748554           | 0.89797157 | 0         | 1.2E-03        | 1.4      | 2.3E-04 |                                                                 |
| 3919952       | MORC3         | NM_015358    | 39.461135 | 0.673669324          | 0.88220845 | 0         | --             | --       | --      |                                                                 |
| 3812206       | TXNDC10       | NM_019022    | 36.302371 | 0.667999068          | 0.89245958 | 0         | --             | --       | --      |                                                                 |
| 3439378       | ZNF10         | NM_015394    | 39.283383 | 0.654746629          | 0.90597868 | 0         | --             | --       | --      | Yes                                                             |
| 3559497       | STRN3         | NM_014574    | 37.344127 | 0.652404644          | 0.88751104 | 0         | --             | --       | --      |                                                                 |
| 3553690       | MARK3         | NM_002376    | 34.591784 | 0.652404607          | 0.91091199 | 0         | 9.0E-01        | 1.1      | 2.2E-05 |                                                                 |
| 3422326       | TBC1D15       | NM_022771    | 38.862173 | 0.643616906          | 0.88530094 | 0         | --             | --       | --      |                                                                 |
| 3483159       | PAN3          | NM_175854    | 37.12723  | 0.638130013          | 0.86350455 | 0         | 4.0E-03        | 1.6      | 1.0E-06 | Yes                                                             |
| 3534201       | PRPF39        | NM_017922    | 38.119535 | 0.631083985          | 0.8804836  | 0         | --             | --       | --      | Yes                                                             |
| 3508696       | PFAAP5        | NM_014887    | 34.65239  | 0.63046337           | 0.87881982 | 0         | 8.3E-02        | 1.6      | 2.2E-19 |                                                                 |
| 3803194       | KIAA1012      | NM_014939    | 41.386581 | 0.629610555          | 0.89340726 | 0         | --             | --       | --      |                                                                 |
| 3419239       | KIAA1040      | NM_015026    | 30.835341 | 0.625638784          | 0.89964397 | 0         | --             | --       | --      |                                                                 |
| 3791168       | KIAA1468      | NM_020854    | 32.221241 | 0.624965346          | 0.86500145 | 0         | 4.2E-01        | 1.3      | 2.2E-03 |                                                                 |
| 3426828       | LOC400340     | XM_375174    | 32.300513 | 0.62132895           | 0.88424702 | 0         | --             | --       | --      |                                                                 |
| 3776193       | SMCHD1        | XM_113962    | 37.268272 | 0.619114084          | 0.86750725 | 0         | --             | --       | --      |                                                                 |
| 4002011       | CXorf23       | NM_198279    | 39.360387 | 0.614026165          | 0.84764885 | 0         | 4.3E-02        | 1.3      | 9.5E-04 |                                                                 |
| 3499453       | TPP2          | NM_003291    | 36.960109 | 0.606904445          | 0.852104   | 0         | 1.2E-03        | 1.2      | 2.6E-05 |                                                                 |
| 3386814       | MGC5306       | NM_024116    | 37.913297 | 0.60351304           | 0.89509147 | 0         | 1.2E-01        | 1.3      | 8.0E-13 |                                                                 |
| 3347658       | ATM           | NM_138293    | 29.172014 | 0.602746005          | 0.8615313  | 0         | 3.1E-01        | 1.3      | 7.3E-05 |                                                                 |
| 3258092       | MARCH3        | NM_017824    | 37.495934 | 0.602455704          | 0.89970256 | 0         | --             | --       | --      |                                                                 |
| 3475717       | FLJ11021      | NM_023012    | 37.642983 | 0.600851363          | 0.87132159 | 0         | 5.1E-01        | 1.3      | 1.9E-03 |                                                                 |
| 3303300       | CHUK          | NM_001278    | 33.360718 | 0.590171254          | 0.88807881 | 0         | --             | --       | --      |                                                                 |
| 3269587       | C10orf137     | NM_015608    | 31.683771 | 0.588928624          | 0.85895485 | 0         | --             | --       | --      | Yes                                                             |
| 3300793       | C10orf4       | NM_203438    | 46.857513 | 0.584014966          | 0.87254933 | 0         | 1.0E+00        | 1.1      | 2.2E-03 |                                                                 |
| 3623771       | TRPM7         | NM_017672    | 36.352196 | 0.58347589           | 0.87550248 | 0         | --             | --       | --      |                                                                 |
| 3429406       | HCFC2         | NM_013320    | 35.499537 | 0.581748587          | 0.87000004 | 0         | 2.9E-01        | 1.3      | 1.1E-04 | Yes                                                             |
| 3991650       | PHF6          | NM_032458    | 28.825447 | 0.581114386          | 0.87733394 | 0         | --             | --       | --      | Yes                                                             |
| 3563459       | SDCCAG1       | NM_004713    | 41.897927 | 0.576384183          | 0.87173712 | 0         | --             | --       | --      |                                                                 |
| 3228097       | TTF1          | NM_007344    | 30.947358 | 0.571317218          | 0.893288   | 0         | --             | --       | --      | Yes                                                             |
| 3627076       | BNIP2         | NM_004330    | 39.037937 | 0.567477979          | 0.87355369 | 0         | --             | --       | --      |                                                                 |
| 3343546       | FLJ22104      | NM_022918    | 47.306082 | 0.562065289          | 0.86173285 | 0         | 5.5E-05        | 1.4      | 3.3E-08 |                                                                 |
| 3475679       | ZCCHC8        | NM_017612    | 31.085683 | 0.561776943          | 0.8926442  | 0         | 1.8E-03        | 1.4      | 3.5E-03 | Yes                                                             |
| 3534923       | KLHDC2        | NM_014315    | 33.443481 | 0.559480592          | 0.866162   | 0         | 8.1E-02        | 1.1      | 3.9E-04 |                                                                 |
| 3962587       | ARFGAP3       | NM_014570    | 40.679221 | 0.559377712          | 0.87971298 | 0         | 1.9E-04        | 1.3      | 5.7E-04 |                                                                 |
| 3733999       | HLC-8         | NM_017941    | 26.812238 | 0.558143683          | 0.89231832 | 0         | --             | --       | --      |                                                                 |
| 3929821       | CRYZL1        | NM_145858    | 44.520149 | 0.554018765          | 0.85595583 | 0         | 9.2E-10        | 1.4      | 4.8E-04 |                                                                 |
| 3783749       | RNF138        | NM_016271    | 37.031065 | 0.551910933          | 0.89058861 | 0         | --             | --       | --      |                                                                 |
| 3547610       | FLJ11806      | NM_024824    | 29.687608 | 0.551282292          | 0.8794114  | 0         | 1.0E+00        | 1.2      | 1.0E-03 |                                                                 |
| 3786039       | PIK3C3        | NM_002647    | 31.744882 | 0.539178985          | 0.87053005 | 0         | 2.9E-01        | 1.2      | 7.7E-04 |                                                                 |
| 3448975       | PTX1          | NM_016570    | 45.740502 | 0.538045621          | 0.85699822 | 0         | --             | --       | --      |                                                                 |
| 3243908       | dJ341D10.1    | NM_001007535 | 34.293705 | 0.534938823          | 0.86443629 | 0         | 8.1E-04        | 1.4      | 1.5E-03 |                                                                 |
| 3150663       | TAF2          | NM_003184    | 26.455745 | 0.530687104          | 0.85113468 | 0         | 1.0E+00        | 1.1      | 1.3E-03 | Yes                                                             |
| 3429754       | KIAA1033      | NM_015275    | 28.50428  | 0.530288345          | 0.86291404 | 0         | 9.2E-01        | 1.3      | 1.8E-04 |                                                                 |
| 3549033       | GOLGA5        | NM_005113    | 32.565547 | 0.524235475          | 0.89163571 | 0         | --             | --       | --      |                                                                 |
| 3363923       | COPB          | NM_016451    | 26.875651 | 0.523039934          | 0.87692565 | 0         | --             | --       | --      |                                                                 |

|         |               |              |           |             |            |   |         |     |         |     |
|---------|---------------|--------------|-----------|-------------|------------|---|---------|-----|---------|-----|
| 3804195 | SLC39A6       | NM_012319    | 29.098477 | 0.518590166 | 0.87135697 | 0 | 6.6E-02 | 1.2 | 1.4E-10 |     |
| 3731228 | LOC90799      | NM_138363    | 46.421092 | 0.514906678 | 0.80989874 | 0 | 4.4E-08 | 1.7 | 1.8E-08 |     |
| 3499585 | BIVM          | NM_017693    | 26.15343  | 0.514696797 | 0.86774494 | 0 | --      | --  | --      |     |
| 3795680 | THOC1         | NM_005131    | 30.646162 | 0.512170107 | 0.85900406 | 0 | --      | --  | --      | Yes |
| 3603336 | IREB2         | NM_004136    | 36.097139 | 0.508175518 | 0.82234397 | 0 | 1.9E-01 | 1.3 | 6.0E-06 |     |
| 3626555 | ADAM10        | NM_001110    | 37.63191  | 0.505299912 | 0.83970386 | 0 | 2.1E-02 | 1.5 | 2.0E-04 | Yes |
| 4020444 | THOC2         | NM_020449    | 25.919178 | 0.502349914 | 0.82961645 | 0 | 3.5E-01 | 1.2 | 7.9E-05 | Yes |
| 3568080 | C14orf150     | NM_001008726 | 28.979471 | 0.500421046 | 0.86874033 | 0 | 2.7E-02 | 1.3 | 5.1E-04 |     |
| 3553607 | EIF5          | NM_001969    | 26.675873 | 0.498266313 | 0.87404788 | 0 | 2.4E-01 | 1.1 | 8.7E-06 | Yes |
| 3468925 | LOC440973     | XM_496654    | 27.123689 | 0.495914011 | 0.86844191 | 0 | --      | --  | --      |     |
| 3869461 | ZNF616        | NM_178523    | 36.274413 | 0.493757899 | 0.85787519 | 0 | --      | --  | --      | Yes |
| 3260829 | C10orf6       | NM_018121    | 23.876811 | 0.493331939 | 0.84070398 | 0 | 1.3E-01 | 1.2 | 2.6E-04 |     |
| 3493448 | C13orf24      | NM_006346    | 25.990485 | 0.492701718 | 0.8623513  | 0 | --      | --  | --      |     |
| 3623424 | COPS2         | NM_004236    | 31.441292 | 0.489719438 | 0.86356411 | 0 | --      | --  | --      | Yes |
| 3909395 | DPM1          | NM_003859    | 37.419552 | 0.489470558 | 0.82859509 | 0 | --      | --  | --      |     |
| 3726772 | CROP          | NM_006107    | 29.248308 | 0.48713641  | 0.84528046 | 0 | 8.9E-02 | 1.4 | 2.3E-29 | Yes |
| 3476012 | MPHOSPH9      | NM_022782    | 25.881097 | 0.48706919  | 0.8361447  | 0 | --      | --  | --      |     |
| 3451670 | DKFZP434G1415 | NM_031292    | 24.814365 | 0.485201226 | 0.84345957 | 0 | --      | --  | --      |     |
| 3860999 | FLJ37549      | NM_152605    | 26.98252  | 0.480679101 | 0.86889554 | 0 | --      | --  | --      | Yes |
| 3428088 | ACTR6         | NM_022496    | 42.951011 | 0.471368324 | 0.84534556 | 0 | --      | --  | --      |     |
| 3446796 | RECQL         | NM_002907    | 32.651918 | 0.470407837 | 0.85675106 | 0 | --      | --  | --      |     |
| 3431426 | CDV1          | NM_014055    | 33.548968 | 0.466020519 | 0.86232483 | 0 | --      | --  | --      |     |
| 3309755 | C10orf119     | NM_024834    | 38.222498 | 0.463138011 | 0.80885865 | 0 | 3.7E-06 | 1.4 | 1.6E-01 |     |
| 3420713 | CAND1         | NM_018448    | 24.72941  | 0.462274351 | 0.82843015 | 0 | --      | --  | --      | Yes |
| 3408018 | ETNK1         | NM_018638    | 25.02841  | 0.460851348 | 0.84457297 | 0 | --      | --  | --      |     |
| 3148796 | NUDCD1        | NM_032869    | 39.452221 | 0.46053617  | 0.83059848 | 0 | 6.5E-04 | 1.5 | 1.6E-03 |     |
| 3538470 | C14orf135     | NM_022495    | 28.569923 | 0.46009984  | 0.83829835 | 0 | --      | --  | --      |     |
| 3518455 | FBXL3         | NM_012158    | 29.201471 | 0.456517445 | 0.85153945 | 0 | --      | --  | --      |     |
| 3282213 | YME1L1        | NM_139313    | 35.401096 | 0.455394981 | 0.84470993 | 0 | --      | --  | --      |     |
| 4014076 | CXorf43       | NM_144657    | 26.863099 | 0.454620399 | 0.84721667 | 0 | --      | --  | --      | Yes |
| 3788833 | POLI          | NM_007195    | 24.028463 | 0.453135226 | 0.86448036 | 0 | --      | --  | --      |     |
| 3138464 | LOC402521     | XM_379848    | 31.016529 | 0.452904057 | 0.84505389 | 0 | 6.6E-06 | 1.4 | 2.0E-07 |     |
| 3203135 | TOPORS        | NM_005802    | 25.186842 | 0.452658628 | 0.84562132 | 0 | --      | --  | --      | Yes |
| 3260099 | C10orf28      | NM_014472    | 24.463598 | 0.451766387 | 0.87183028 | 0 | --      | --  | --      |     |
| 3504791 | EFHA1         | NM_152726    | 36.282614 | 0.450266701 | 0.80440151 | 0 | --      | --  | --      |     |
| 3421897 | CNOT2         | NM_014515    | 30.567851 | 0.449912047 | 0.83854224 | 0 | --      | --  | --      | Yes |
| 3258260 | SEC15L1       | NM_019053    | 26.42035  | 0.449141673 | 0.84882775 | 0 | --      | --  | --      |     |
| 3235932 | PRPF18        | NM_003675    | 30.798098 | 0.447539868 | 0.85368258 | 0 | --      | --  | --      | Yes |
| 3530982 | KIAA1333      | NM_017769    | 26.35962  | 0.443013326 | 0.83990133 | 0 | --      | --  | --      | Yes |
| 3629811 | MYCPBP        | NM_005848    | 22.822206 | 0.441706804 | 0.83899105 | 0 | --      | --  | --      |     |
| 3622934 | MYEF2         | NM_016132    | 21.925334 | 0.439519089 | 0.83593903 | 0 | 5.0E-02 | 1.3 | 8.2E-04 | Yes |
| 3831774 | ZNF383        | NM_152604    | 24.513993 | 0.438434667 | 0.86480767 | 0 | --      | --  | --      | Yes |
| 3762625 | MBTD1         | NM_017643    | 38.500279 | 0.438125987 | 0.79041901 | 0 | 4.2E-08 | 1.6 | 9.7E-04 | Yes |
| 3488253 | COG3          | NM_031431    | 24.476571 | 0.437926508 | 0.85407634 | 0 | --      | --  | --      |     |
| 3849797 | ZNF561        | NM_152289    | 22.928738 | 0.437397191 | 0.84400847 | 0 | --      | --  | --      | Yes |
| 3407824 | GOLT1B        | NM_016072    | 27.703305 | 0.437128468 | 0.82199948 | 0 | --      | --  | --      |     |
| 3627363 | NARG2         | NM_001018089 | 27.9936   | 0.435883082 | 0.8112676  | 0 | --      | --  | --      |     |
| 3550392 | PAPOLA        | NM_032632    | 23.172787 | 0.43335849  | 0.81863231 | 0 | 2.8E-01 | 1.4 | 2.6E-04 | Yes |
| 3256560 | MINPP1        | NM_004897    | 29.806003 | 0.432780416 | 0.83678826 | 0 | --      | --  | --      |     |
| 3177563 | MAK10         | NM_024635    | 20.760601 | 0.432569713 | 0.86559305 | 0 | --      | --  | --      |     |
| 3717635 | ZNF207        | NM_003457    | 21.974105 | 0.432377949 | 0.8461476  | 0 | 1.5E-02 | 1.4 | 1.8E-03 | Yes |
| 3462949 | OSBPL8        | NM_020841    | 25.827002 | 0.427641208 | 0.79193555 | 0 | --      | --  | --      |     |
| 3695268 | APPBP1        | NM_003905    | 34.408078 | 0.426577636 | 0.80992453 | 0 | --      | --  | --      |     |
| 3379390 | SUV420H1      | NM_017635    | 23.548099 | 0.426314587 | 0.81955319 | 0 | 8.8E-05 | 1.4 | 1.3E-04 | Yes |
| 3138414 | ARMC1         | NM_018120    | 27.763784 | 0.425840929 | 0.85194493 | 0 | 1.0E+00 | 1.2 | 7.0E-04 |     |
| 3869379 | ZNF614        | NM_025040    | 23.394971 | 0.424830196 | 0.84833646 | 0 | 4.7E-03 | 1.4 | 1.3E-05 | Yes |
| 3264004 | SHOC2         | NM_007373    | 33.454428 | 0.424554161 | 0.79322294 | 0 | 1.7E-02 | 1.3 | 7.4E-04 |     |
| 3298738 | KIAA0261      | NM_015045    | 23.333744 | 0.422443435 | 0.81758032 | 0 | --      | --  | --      |     |
| 3247757 | UBE2D1        | NM_003338    | 28.559191 | 0.422151164 | 0.83366406 | 0 | --      | --  | --      |     |
| 3541137 | EIF2S1        | NM_004094    | 38.757052 | 0.420428234 | 0.85569336 | 0 | --      | --  | --      | Yes |
| 3879467 | XRN2          | NM_012255    | 35.223681 | 0.419426156 | 0.79198948 | 0 | 2.9E-06 | 1.4 | 1.4E-01 | Yes |
| 3898224 | LOC402340     | XM_378033    | 27.986778 | 0.417759581 | 0.83010993 | 0 | --      | --  | --      |     |
| 3263790 | CSPG6         | NM_005445    | 22.812515 | 0.41651763  | 0.8459617  | 0 | 2.4E-02 | 1.3 | 1.4E-06 | Yes |
| 3410384 | LOC440176     | XM_495984    | 21.035913 | 0.415269585 | 0.83837709 | 0 | --      | --  | --      |     |
| 3796244 | METTL4        | NM_022840    | 19.741935 | 0.410188807 | 0.86193521 | 0 | --      | --  | --      |     |
| 3800779 | ESCO1         | NM_052911    | 21.007626 | 0.40998033  | 0.82764433 | 0 | --      | --  | --      |     |
| 3537967 | KIAA0586      | NM_014749    | 29.23208  | 0.409651452 | 0.80257608 | 0 | --      | --  | --      |     |
| 3462843 | NAP1L1        | NM_004537    | 26.814064 | 0.407388681 | 0.82502866 | 0 | 3.6E-01 | 1.5 | 1.2E-07 |     |
| 3509910 | FAM48A        | NM_001014286 | 20.721187 | 0.402143801 | 0.85007601 | 0 | --      | --  | --      |     |
| 3780287 | RNMT          | NM_003799    | 29.480614 | 0.400874219 | 0.78091524 | 0 | 1.7E-04 | 1.3 | 8.5E-02 | Yes |
| 3784727 | STATIP1       | NM_018255    | 35.627248 | 0.399705226 | 0.78395271 | 0 | 7.4E-07 | 1.4 | 5.8E-07 | Yes |
| 3526378 | FLJ11305      | NM_018386    | 25.164564 | 0.395917276 | 0.8363751  | 0 | --      | --  | --      |     |
| 3284882 | CUL2          | NM_003591    | 45.327252 | 0.392551104 | 0.80431517 | 0 | --      | --  | --      |     |
| 3452323 | SLC38A2       | NM_018976    | 28.085116 | 0.391947328 | 0.8065994  | 0 | 1.1E-06 | 1.5 | 5.4E-06 |     |
| 3989721 | LOC339793     | XM_291017    | 23.262208 | 0.390676112 | 0.80320678 | 0 | --      | --  | --      |     |
| 3529156 | C14orf120     | XM_033371    | 22.262218 | 0.389889712 | 0.8170926  | 0 | --      | --  | --      | Yes |
| 3636522 | HDGFRP3       | NM_016073    | 24.716095 | 0.388545918 | 0.81744298 | 0 | 1.0E-03 | 1.5 | 1.6E-01 |     |
| 3344897 | CRSP6         | NM_004268    | 24.421464 | 0.387842737 | 0.7936044  | 0 | 9.2E-05 | 1.4 | 2.4E-02 | Yes |
| 3348891 | FLJ10726      | NM_018195    | 24.396629 | 0.387281879 | 0.85205084 | 0 | 1.1E-01 | 1.2 | 2.7E-04 |     |
| 4018755 | LRCH2         | NM_020871    | 19.313973 | 0.387239239 | 0.84413077 | 0 | 1.7E-01 | 1.3 | 2.6E-09 |     |
| 3292448 | HERC4         | NM_022079    | 33.177857 | 0.385115095 | 0.80572873 | 0 | --      | --  | --      |     |
| 3765642 | KIAA1287      | NM_020748    | 20.136301 | 0.385046188 | 0.83220682 | 0 | --      | --  | --      | Yes |
| 3249738 | HNRPH3        | NM_021644    | 23.652304 | 0.38475426  | 0.81576951 | 0 | 5.2E-02 | 1.5 | 6.6E-04 | Yes |
| 3766960 | SMURF2        | NM_022739    | 29.683833 | 0.384126545 | 0.76606263 | 0 | 9.5E-04 | 1.4 | 6.5E-15 | Yes |

|         |           |              |           |             |            |          |         |     |         |     |
|---------|-----------|--------------|-----------|-------------|------------|----------|---------|-----|---------|-----|
| 3874584 |           | ---          | 24.464732 | 0.384108774 | 0.82458268 | 0        | --      | --  | --      |     |
| 3130113 | GTF2E2    | NM_002095    | 21.939424 | 0.381584584 | 0.80781208 | 0        | --      | --  | --      | Yes |
| 3860954 | KIAA0961  | NM_014898    | 26.312213 | 0.381053319 | 0.83795374 | 0        | --      | --  | --      |     |
| 3564790 | ERO1L     | NM_014584    | 21.362318 | 0.380745322 | 0.8368888  | 0        | --      | --  | --      |     |
| 3625326 | CCPG1     | NM_020739    | 31.198583 | 0.379918215 | 0.79243056 | 0        | --      | --  | --      |     |
| 4013730 | BRWD3     | NM_153252    | 20.238804 | 0.378973044 | 0.79623836 | 0        | 4.0E-02 | 1.3 | 5.9E-07 |     |
| 3915087 | USP25     | NM_013396    | 24.079298 | 0.378765117 | 0.81742889 | 0        | --      | --  | --      |     |
| 3340697 | UVRAG     | NM_003369    | 26.47704  | 0.377026518 | 0.82574787 | 0        | 1.1E-02 | 1.3 | 1.1E-04 |     |
| 3365249 | LOC113174 | NM_138421    | 26.59136  | 0.375531784 | 0.79884993 | 0        | --      | --  | --      |     |
| 3362934 | LOC58486  | NM_021211    | 26.557064 | 0.375099032 | 0.8150084  | 0        | 1.8E-03 | 1.6 | 1.1E-05 |     |
| 3799542 | C18orf9   | NM_024899    | 20.06949  | 0.371428434 | 0.85084289 | 0        | --      | --  | --      |     |
| 3719474 | TADA2L    | NM_001488    | 25.728868 | 0.36768052  | 0.8454668  | 0        | --      | --  | --      | Yes |
| 3860450 | ZNF566    | NM_032838    | 20.297837 | 0.367299391 | 0.83412299 | 0        | --      | --  | --      | Yes |
| 3499632 | ERCC5     | NM_000123    | 24.293492 | 0.365324754 | 0.84827204 | 0        | --      | --  | --      |     |
| 3439603 | JARID1A   | NM_005056    | 23.91859  | 0.36274968  | 0.7625087  | 0        | 3.3E-04 | 1.3 | 6.4E-06 | Yes |
| 3345774 | JRKL      | NM_003772    | 32.315204 | 0.361908908 | 0.82272275 | 0        | --      | --  | --      | Yes |
| 3421446 | CPSF6     | NM_007007    | 20.203572 | 0.361668878 | 0.79577133 | 0        | 4.3E-05 | 1.4 | 4.9E-01 | Yes |
| 3426215 | MRPL42    | NM_172178    | 22.395932 | 0.361193099 | 0.80344449 | 0        | --      | --  | --      | Yes |
| 3975467 | UTY       | NM_182660    | 19.999705 | 0.358580795 | 0.82331612 | 0        | --      | --  | --      |     |
| 3362468 | SBF2      | NM_030962    | 21.93511  | 0.358011274 | 0.7820133  | 0        | --      | --  | --      |     |
| 3344861 | PTD012    | NM_014039    | 21.228008 | 0.357981862 | 0.81710348 | 0        | --      | --  | --      |     |
| 3861037 | ZNF607    | NM_032689    | 27.304931 | 0.35393553  | 0.8199002  | 0        | --      | --  | --      | Yes |
| 3217807 | TEX10     | NM_017746    | 28.778089 | 0.353799882 | 0.77878814 | 0        | 1.4E-03 | 1.4 | 1.8E-04 |     |
| 3849267 | ZNF558    | NM_144693    | 23.490544 | 0.35256704  | 0.80439231 | 0        | 2.1E-05 | 1.4 | 3.6E-01 | Yes |
| 3327948 | TTC17     | NM_018259    | 17.428819 | 0.352303283 | 0.81538937 | 0        | 9.2E-01 | 1.3 | 8.9E-04 |     |
| 3447129 | KIAA0528  | NM_014802    | 17.699574 | 0.350674925 | 0.83350067 | 0        | 4.6E-01 | 1.2 | 7.7E-06 |     |
| 3389529 | KIAA1826  | NM_032424    | 48.132755 | 0.349414062 | 0.79963694 | 0        | --      | --  | --      |     |
| 3497790 | RANBP5    | NM_002271    | 17.545348 | 0.347646861 | 0.81120207 | 0        | 1.1E-01 | 1.1 | 1.5E-11 |     |
| 3869312 | ZNF649    | NM_023074    | 17.562904 | 0.347607619 | 0.83428424 | 0        | --      | --  | --      | Yes |
| 3285614 | ZNF25     | NM_145011    | 19.992011 | 0.346836076 | 0.82011059 | 0        | --      | --  | --      | Yes |
| 3531032 | SCFD1     | NM_182835    | 36.557283 | 0.346824883 | 0.77912669 | 0        | --      | --  | --      |     |
| 3423184 | ZDHHC17   | NM_015336    | 23.786147 | 0.34335445  | 0.81953669 | 0        | --      | --  | --      |     |
| 3240340 | WAC       | NM_100486    | 21.595622 | 0.3428563   | 0.81505321 | 0        | --      | --  | --      |     |
| 3719161 | ZNF403    | NM_024835    | 27.888447 | 0.341655009 | 0.79688969 | 0        | --      | --  | --      |     |
| 3547500 | SPATA7    | NM_018418    | 20.306569 | 0.340943534 | 0.8163124  | 0        | --      | --  | --      |     |
| 3476130 | SNBO1     | NM_018183    | 23.656538 | 0.339267807 | 0.76089556 | 0        | --      | --  | --      |     |
| 3462930 | FLJ23560  | NM_024685    | 19.909001 | 0.337683677 | 0.81095748 | 0        | --      | --  | --      |     |
| 3653317 | RBBP6     | NM_018703    | 17.272347 | 0.335939933 | 0.80293391 | 0        | 1.5E-01 | 1.3 | 1.6E-06 |     |
| 3860824 | ZNF569    | NM_152484    | 16.090741 | 0.334663121 | 0.83919398 | 0        | --      | --  | --      | Yes |
| 3383322 | FLJ23441  | NM_024678    | 17.798527 | 0.331269402 | 0.8348163  | 0        | 9.0E-01 | 1.4 | 2.8E-04 |     |
| 3414512 | LARP4     | NM_052879    | 19.93277  | 0.330654603 | 0.80856573 | 0        | --      | --  | --      |     |
| 3864847 | ZNF155    | NM_003445    | 17.471161 | 0.329704625 | 0.84661263 | 0        | --      | --  | --      | Yes |
| 3831698 | ZNF420    | NM_144689    | 18.8199   | 0.328820843 | 0.8026368  | 0        | --      | --  | --      | Yes |
| 3343252 | HSPC138   | NM_016401    | 23.200744 | 0.328534437 | 0.78910773 | 0        | --      | --  | --      |     |
| 3591963 | EIF3S1    | NM_003758    | 29.556389 | 0.325226822 | 0.80157952 | 0        | --      | --  | --      | Yes |
| 3346584 | BIRC2     | NM_001166    | 26.479715 | 0.324977981 | 0.79003576 | 0        | --      | --  | --      |     |
| 3322717 | GTF2H1    | NM_005316    | 20.850942 | 0.324975678 | 0.82418608 | 0        | --      | --  | --      | Yes |
| 3543884 | ZNF410    | NM_021188    | 22.616709 | 0.323244852 | 0.77908767 | 0        | --      | --  | --      | Yes |
| 3524618 | FLJ10154  | NM_018011    | 18.56706  | 0.321472723 | 0.78291078 | 0        | 7.8E-05 | 1.6 | 2.1E-06 |     |
| 3307795 | C10orf118 | NM_018017    | 24.392816 | 0.320475819 | 0.77104553 | 0        | --      | --  | --      | Yes |
| 3136782 | NSMAF     | NM_003580    | 17.361179 | 0.320046157 | 0.82202011 | 0        | 3.7E-04 | 1.5 | 7.4E-05 |     |
| 3488022 | KIAA1704  | NM_018559    | 17.069295 | 0.320020538 | 0.83322859 | 0        | --      | --  | --      |     |
| 3828887 | ZNF507    | NM_014910    | 19.920401 | 0.31828991  | 0.78734427 | 0        | --      | --  | --      | Yes |
| 3512527 | RCN1      | NM_002901    | 21.253226 | 0.3159073   | 0.78541479 | 0        | 5.7E-01 | 1.2 | 1.1E-04 |     |
| 2600218 | CHPF      | NM_024536    | 38.86647  | 0.314269693 | -0.8233834 | 2.28E-23 | 6.3E-07 | 1.3 | 1.8E-03 |     |
| 3238466 | COMMD3    | NM_012071    | 25.73324  | 0.310587641 | 0.77988686 | 0        | 1.6E-08 | 1.8 | 6.0E-04 |     |
| 3144760 | LOC389677 | NM_203390    | 15.347699 | 0.309244752 | 0.79061472 | 0        | --      | --  | --      |     |
| 3784602 | GALNT1    | NM_020474    | 25.808809 | 0.308936841 | 0.80260301 | 0        | --      | --  | --      |     |
| 3131916 | WHSC1L1   | NM_023034    | 16.671587 | 0.306409622 | 0.75161027 | 0        | 1.1E-02 | 1.3 | 1.5E-04 | Yes |
| 3749086 | AKAP10    | NM_007202    | 17.039501 | 0.304025662 | 0.81536203 | 0        | --      | --  | --      |     |
| 3463571 | PPP1R12A  | NM_002480    | 18.349904 | 0.303783258 | 0.78899856 | 0        | --      | --  | --      |     |
| 3851374 | FLJ38281  | NM_152601    | 17.877493 | 0.303436296 | 0.8095306  | 0        | 5.7E-01 | 1.1 | 2.4E-04 |     |
| 3412008 | PPHLN1    | NM_201515    | 19.153435 | 0.301857946 | 0.81951508 | 0        | 1.0E+00 | 1.3 | 2.6E-09 |     |
| 3518977 | C13orf7   | NM_024546    | 32.295333 | 0.299064985 | 0.77427033 | 0        | 1.1E-05 | 1.5 | 1.7E-03 |     |
| 3683050 | SMG1      | NM_015092    | 19.639727 | 0.297932197 | 0.74558991 | 0        | 2.6E-03 | 1.3 | 1.6E-16 | Yes |
| 3410614 | ARGFX     | NM_001012659 | 15.936039 | 0.297624943 | 0.7658056  | 0        | 3.4E-02 | 1.3 | 9.7E-07 | Yes |
| 3164221 | C9orf55   | NM_017925    | 17.002435 | 0.29700683  | 0.77296058 | 0        | --      | --  | --      |     |
| 3166844 | CHMP5     | NM_016410    | 26.524213 | 0.296464604 | 0.77632282 | 0        | --      | --  | --      |     |
| 3835494 | ZNF226    | NM_015919    | 15.275864 | 0.296456098 | 0.79851752 | 0        | --      | --  | --      | Yes |
| 3352904 | SC5DL     | NM_006918    | 24.801497 | 0.296416092 | 0.76592031 | 0        | 3.3E-02 | 1.5 | 1.4E-07 |     |
| 3569200 | ATP6V1D   | NM_015994    | 40.194993 | 0.29517668  | 0.71330641 | 3.11E-15 | --      | --  | --      |     |
| 3537747 | PSMA3     | NM_152132    | 24.525553 | 0.293912031 | 0.72285538 | 8.88E-16 | --      | --  | --      |     |
| 3176999 | C9orf76   | NM_024945    | 14.275191 | 0.292980555 | 0.81496612 | 0        | --      | --  | --      |     |
| 3245682 | MAPK8     | NM_002750    | 43.497375 | 0.2927956   | 0.76837736 | 0        | 6.4E-09 | 1.7 | 4.5E-01 |     |
| 3257750 | HECTD2    | NM_182765    | 18.886501 | 0.292272739 | 0.81536348 | 0        | --      | --  | --      |     |
| 3307120 | ZDHHC6    | NM_022494    | 39.281674 | 0.290122243 | 0.76074034 | 0        | --      | --  | --      |     |
| 3277662 | UPF2      | NM_080599    | 19.043726 | 0.289605916 | 0.79971129 | 0        | --      | --  | --      | Yes |
| 3188299 | FLJ41455  | XM_499147    | 18.499875 | 0.289144863 | 0.80878773 | 0        | 1.0E+00 | 1.2 | 5.1E-05 |     |
| 3660858 | LOC390547 | XM_372553    | 20.605053 | 0.28740533  | 0.76896756 | 0        | 1.0E+00 | 1.0 | 1.6E-05 |     |
| 3221277 | LOC441463 | XM_499159    | 18.367583 | 0.285996843 | 0.77022937 | 0        | --      | --  | --      |     |
| 3181302 | NCBP1     | NM_002486    | 16.146177 | 0.284469948 | 0.80468974 | 0        | --      | --  | --      | Yes |
| 3304624 | NT5C2     | NM_012229    | 15.990045 | 0.283858539 | 0.79182009 | 0        | --      | --  | --      |     |
| 3571347 | NUMB      | NM_001005743 | 19.805556 | 0.283604927 | 0.77309137 | 0        | 6.7E-03 | 1.2 | 6.6E-06 |     |
| 3183364 | DEPDC1    | NM_017779    | 17.186283 | 0.283604382 | 0.81633945 | 0        | 6.2E-02 | 1.5 | 2.7E-07 |     |

|         |           |              |           |             |            |          |         |     |         |     |
|---------|-----------|--------------|-----------|-------------|------------|----------|---------|-----|---------|-----|
| 3365437 | TSG101    | NM_006292    | 14.705866 | 0.283260596 | 0.77430465 | 0        | --      | --  | --      | Yes |
| 3471224 | MGC14560  | NM_016301    | 25.31628  | 0.283199546 | 0.77058095 | 0        | --      | --  | --      |     |
| 3504054 | ZNF237    | NM_014242    | 15.304878 | 0.282301195 | 0.83893314 | 0        | --      | --  | --      |     |
| 3482219 | NUPL1     | NM_001008565 | 13.329056 | 0.280647314 | 0.78598316 | 0        | 8.0E-02 | 1.2 | 1.7E-04 |     |
| 3600744 | ARIH1     | NM_005744    | 17.270668 | 0.28031216  | 0.81081066 | 0        | 1.6E-01 | 1.2 | 2.7E-05 |     |
| 3916576 | GABPA     | NM_002040    | 15.034636 | 0.279912518 | 0.7764924  | 0        | 1.8E-04 | 1.5 | 1.7E-06 | Yes |
| 3250019 | DDX50     | NM_024045    | 14.971859 | 0.279788439 | 0.78588531 | 0        | 1.0E+00 | 1.2 | 3.9E-05 |     |
| 3224259 | RBM18     | NM_033117    | 16.218246 | 0.278813266 | 0.7761642  | 0        | 2.4E-04 | 1.4 | 1.9E-01 |     |
| 3784468 | ZNF397    | NM_032347    | 16.98023  | 0.277808204 | 0.76349259 | 0        | 1.3E-06 | 1.3 | 5.4E-06 | Yes |
| 3857171 | ZNF675    | NM_138330    | 19.340228 | 0.2764391   | 0.80475391 | 0        | --      | --  | --      | Yes |
| 3778252 | ANKRD12   | NM_015208    | 15.945231 | 0.275895441 | 0.77042162 | 0        | 3.7E-01 | 1.5 | 2.6E-04 |     |
| 3183238 | GARNL1    | NM_014990    | 22.225911 | 0.274466693 | 0.72051542 | 1.33E-15 | 3.0E-04 | 1.9 | 1.7E-02 |     |
| 3503164 | CDC16     | NM_003903    | 16.922834 | 0.274406794 | 0.78997134 | 0        | --      | --  | --      |     |
| 3257559 | RPP30     | NM_006413    | 15.092056 | 0.274391211 | 0.81471987 | 0        | --      | --  | --      | Yes |
| 3125001 | FLJ23749  | NM_152271    | 20.732911 | 0.273169257 | 0.76873009 | 0        | 1.7E-03 | 1.4 | 3.3E-02 |     |
| 3325680 | hfl-B5    | NM_006360    | 20.602206 | 0.271476161 | 0.78432705 | 0        | --      | --  | --      | Yes |
| 3781082 | SNRPD1    | NM_006938    | 24.13454  | 0.269696995 | 0.77796751 | 0        | --      | --  | --      | Yes |
| 3563734 | SOS2      | NM_006939    | 14.678202 | 0.268124629 | 0.77062667 | 0        | --      | --  | --      |     |
| 3212976 | ZCCHC6    | NM_024617    | 13.993324 | 0.267876421 | 0.803599   | 0        | --      | --  | --      |     |
| 3337618 | C11orf23  | NM_018312    | 14.434791 | 0.267399946 | 0.7527903  | 0        | --      | --  | --      |     |
| 3236448 | SUV39H2   | NM_024670    | 14.842894 | 0.266253333 | 0.78686176 | 0        | --      | --  | --      | Yes |
| 3641871 | LINS1     | NM_018148    | 13.745608 | 0.265316525 | 0.80304375 | 0        | 2.0E-01 | 1.2 | 9.3E-04 |     |
| 3713575 | PRPSAP2   | NM_002767    | 15.767684 | 0.265258915 | 0.80551808 | 0        | --      | --  | --      |     |
| 3578278 | C14orf103 | NM_018036    | 14.424958 | 0.264897908 | 0.74911436 | 0        | 5.5E-01 | 1.0 | 1.3E-03 |     |
| 3904226 | SNPC2     | NM_184237    | 17.82844  | 0.264487338 | 0.74192098 | 0        | 2.2E-02 | 1.5 | 3.9E-05 | Yes |
| 3428131 | SCYL2     | NM_017988    | 18.494341 | 0.264102355 | 0.75537662 | 0        | --      | --  | --      |     |
| 3537813 | ACTR10    | NM_018477    | 17.971351 | 0.26345426  | 0.7651285  | 0        | --      | --  | --      |     |
| 3572235 | MLH3      | NM_014381    | 15.375114 | 0.2633454   | 0.78659214 | 0        | 8.2E-02 | 1.2 | 6.2E-04 |     |
| 3390067 | NPAT      | NM_002519    | 13.908881 | 0.26294885  | 0.75042207 | 0        | --      | --  | --      |     |
| 3826041 | ZNF253    | NM_021047    | 13.624568 | 0.262846953 | 0.7879615  | 0        | 8.0E-02 | 1.2 | 4.2E-04 | Yes |
| 3471704 | PCNP      | NM_020357    | 17.53516  | 0.262458531 | 0.74025043 | 0        | 1.4E-01 | 1.3 | 7.9E-04 |     |
| 3887635 | NCOA3     | NM_006534    | 16.238313 | 0.2612765   | 0.77078074 | 0        | --      | --  | --      | Yes |
| 4019900 | CUL4B     | NM_003588    | 16.459816 | 0.2612219   | 0.78409132 | 0        | --      | --  | --      |     |
| 3679564 | LOC345576 | XM_293886    | 14.671789 | 0.260641828 | 0.77979674 | 0        | --      | --  | --      |     |
| 3453177 | FLJ20436  | NM_017822    | 16.140163 | 0.26022824  | 0.74881717 | 0        | --      | --  | --      |     |
| 3279410 | C10orf97  | NM_024948    | 19.93185  | 0.260023617 | 0.76489782 | 0        | 2.2E-01 | 1.3 | 9.7E-04 |     |
| 3860491 | LOC342892 | XM_292740    | 15.99795  | 0.259430861 | 0.79478708 | 0        | --      | --  | --      | Yes |
| 3218067 | MRPL50    | NM_019051    | 14.363751 | 0.258142674 | 0.78948282 | 0        | 1.1E-03 | 1.5 | 8.3E-03 |     |
| 3826601 | H-plk     | NM_015852    | 13.048875 | 0.257526101 | 0.78289356 | 0        | --      | --  | --      | Yes |
| 3214749 | NOL8      | NM_017948    | 13.145957 | 0.256662401 | 0.7856947  | 0        | 6.6E-01 | 1.3 | 1.8E-04 |     |
| 3906821 | C20orf111 | NM_016470    | 12.765198 | 0.256575343 | 0.81085089 | 0        | --      | --  | --      |     |
| 3784509 | ZNF271    | NM_006629    | 55.045973 | 0.256480632 | 0.78193803 | 0        | --      | --  | --      | Yes |
| 3690084 | DNAJA2    | NM_005880    | 22.889155 | 0.255226976 | 0.77138915 | 0        | --      | --  | --      |     |
| 3764103 | SFRS1     | NM_006924    | 15.76764  | 0.254728885 | 0.74904177 | 0        | --      | --  | --      | Yes |
| 3835467 | ZNF155    | NM_003445    | 18.435516 | 0.254148623 | 0.76082442 | 0        | 1.2E-03 | 1.3 | 4.1E-08 | Yes |
| 3389745 | CWF19L2   | NM_152434    | 15.471595 | 0.253031028 | 0.77744729 | 0        | --      | --  | --      |     |
| 3224366 | MNAB      | NM_018835    | 18.068913 | 0.252432607 | 0.72326736 | 8.88E-16 | --      | --  | --      |     |
| 3250168 | VPS26     | NM_004896    | 19.133189 | 0.252385257 | 0.77588222 | 0        | --      | --  | --      |     |
| 3464622 | Cep290    | NM_025114    | 20.014497 | 0.251941147 | 0.75005199 | 0        | 4.0E-01 | 1.3 | 1.2E-04 |     |
| 3668898 | ZFP1      | NM_153688    | 12.618906 | 0.251226345 | 0.80987396 | 0        | --      | --  | --      | Yes |
| 3309629 | TIAL1     | NM_022333    | 11.846433 | 0.250688072 | 0.80877552 | 0        | --      | --  | --      | Yes |
| 3148582 | EIF3S6    | NM_001568    | 16.218166 | 0.250655179 | 0.78357384 | 0        | 1.4E-03 | 1.8 | 1.8E-01 | Yes |
| 3747288 | ZNF287    | NM_020653    | 16.531892 | 0.250169053 | 0.80908182 | 0        | --      | --  | --      | Yes |
| 3244539 | ZNF22     | NM_006963    | 15.354926 | 0.248649593 | 0.77504252 | 0        | 4.0E-05 | 1.8 | 9.0E-07 | Yes |
| 3917155 | USP16     | NM_001001992 | 15.812853 | 0.248113861 | 0.78809551 | 0        | --      | --  | --      |     |
| 3489020 | RB1       | NM_000321    | 28.732607 | 0.246857284 | 0.76774189 | 0        | --      | --  | --      | Yes |
| 3259631 | MLR2      | NM_032440    | 13.240501 | 0.24668681  | 0.78776119 | 0        | 2.6E-01 | 1.3 | 1.2E-03 | Yes |
| 3212728 | AGTPBP1   | NM_015239    | 23.283639 | 0.246481106 | 0.68660251 | 7.99E-14 | 9.6E-05 | 1.5 | 1.0E-05 |     |
| 3626704 | FLJ13213  | NM_024755    | 20.357862 | 0.245021892 | 0.80270404 | 0        | --      | --  | --      |     |
| 3576812 | TRIP11    | NM_004239    | 35.754747 | 0.244267192 | 0.75525062 | 0        | 1.0E+00 | 1.1 | 4.3E-05 | Yes |
| 3385003 | ZF        | NM_021212    | 15.682577 | 0.241861099 | 0.73538792 | 0        | 6.6E-06 | 1.5 | 3.0E-06 | Yes |
| 3981120 | OGT       | NM_181673    | 23.935584 | 0.241827634 | 0.74536301 | 0        | 5.3E-06 | 1.4 | 3.8E-24 |     |
| 3856075 | ZNF66     | NM_001009883 | 24.801003 | 0.241297346 | 0.75468793 | 0        | 1.7E-04 | 1.3 | 9.2E-05 | Yes |
| 3420079 | LEMD3     | NM_014319    | 22.533155 | 0.240552274 | 0.73994727 | 0        | 1.9E-03 | 1.1 | 4.4E-03 |     |
| 3238231 | MLLT10    | NM_001009569 | 15.249995 | 0.240223692 | 0.74741698 | 0        | 1.7E-02 | 1.3 | 8.7E-05 | Yes |
| 3444820 | LRP6      | NM_002336    | 32.506646 | 0.23624378  | 0.70269243 | 1.15E-14 | 3.4E-10 | 1.6 | 4.2E-07 |     |
| 3870195 | ZNF677    | NM_182609    | 19.191827 | 0.234490546 | 0.79358626 | 0        | --      | --  | --      | Yes |
| 3284073 | EPC1      | NM_025209    | 17.203589 | 0.233287708 | 0.71968968 | 1.33E-15 | 2.6E-07 | 1.4 | 5.2E-05 | Yes |
| 3811497 | VPS4B     | NM_004869    | 15.469357 | 0.232597342 | 0.78282436 | 0        | --      | --  | --      | Yes |
| 4012949 | ABCB7     | NM_004299    | 13.310118 | 0.232251865 | 0.76154853 | 0        | 6.8E-03 | 1.3 | 9.6E-06 |     |
| 3666779 | NFAT5     | NM_138713    | 13.231622 | 0.23058939  | 0.74620264 | 0        | 4.2E-01 | 1.3 | 3.8E-04 | Yes |
| 3631794 | MYO9A     | NM_006901    | 17.802812 | 0.229265899 | 0.66170311 | 1.25E-12 | 9.0E-03 | 1.4 | 4.7E-05 |     |
| 3983154 | ZNF6      | NM_021998    | 16.174599 | 0.228818578 | 0.74276346 | 0        | --      | --  | --      | Yes |
| 3835565 | ZNF233    | NM_181756    | 27.455203 | 0.226751848 | 0.71287938 | 3.11E-15 | 4.6E-05 | 1.4 | 6.5E-02 | Yes |
| 3196691 | LOC392281 | XM_497005    | 13.431722 | 0.225944497 | 0.78329147 | 0        | --      | --  | --      |     |
| 3538789 | SLC38A6   | NM_153811    | 33.274921 | 0.225874423 | 0.70150722 | 1.35E-14 | --      | --  | --      |     |
| 3742652 | NUP88     | NM_002532    | 46.006401 | 0.225335635 | 0.67518046 | 2.91E-13 | 4.8E-08 | 1.5 | 1.1E-08 |     |
| 3269328 | ZRANB1    | NM_017580    | 11.116598 | 0.224326149 | 0.78284858 | 0        | --      | --  | --      |     |
| 3809324 | TXNL1     | NM_004786    | 14.043697 | 0.223547115 | 0.75457542 | 0        | --      | --  | --      |     |
| 3511189 | MTRF1     | NM_004294    | 17.199298 | 0.223320233 | 0.78309717 | 0        | --      | --  | --      | Yes |
| 3462693 | HRB2      | NM_007043    | 20.27751  | 0.223092402 | 0.74286608 | 0        | --      | --  | --      | Yes |
| 3163136 | SNAPC3    | NM_003084    | 12.15933  | 0.222854188 | 0.78398511 | 0        | --      | --  | --      | Yes |
| 3534886 | KLHDC1    | NM_172193    | 21.951435 | 0.222432454 | 0.77345449 | 0        | --      | --  | --      |     |
| 3743119 | KIAA0753  | NM_014804    | 15.318323 | 0.221266323 | 0.74057291 | 0        | --      | --  | --      |     |



|         |           |              |           |             |            |          |         |     |         |     |
|---------|-----------|--------------|-----------|-------------|------------|----------|---------|-----|---------|-----|
| 3183111 | CDW92     | NM_080546    | 33.352649 | 0.221227195 | 0.73327457 | 2.22E-16 | 5.6E-09 | 1.8 | 6.0E-11 |     |
| 3685329 | FLJ21816  | NM_024675    | 10.297391 | 0.220958209 | 0.79438443 | 0        | --      | --  | --      |     |
| 3147321 | EDD1      | NM_015902    | 13.383765 | 0.220430916 | 0.73012866 | 4.44E-16 | 9.9E-03 | 1.2 | 7.2E-07 | Yes |
| 3216476 | ZNF510    | NM_014930    | 11.343223 | 0.219540025 | 0.74964877 | 0        | --      | --  | --      | Yes |
| 3139035 | ARFGGF1   | NM_006421    | 19.178104 | 0.219266217 | 0.670807   | 4.71E-13 | 2.2E-04 | 1.5 | 5.7E-02 |     |
| 3835418 | ZNF224    | NM_013398    | 11.997083 | 0.21864537  | 0.79308856 | 0        | 9.1E-01 | 1.1 | 6.6E-07 | Yes |
| 3831475 | ZNF382    | NM_032825    | 15.639335 | 0.218397491 | 0.71785642 | 1.78E-15 | --      | --  | --      | Yes |
| 3591909 | HSPC129   | NM_016396    | 11.185229 | 0.218254119 | 0.7286537  | 4.44E-16 | 9.4E-03 | 1.2 | 6.3E-06 |     |
| 3752097 | C17orf42  | NM_024683    | 11.485527 | 0.217628793 | 0.80304913 | 0        | --      | --  | --      |     |
| 4001369 | SCML2     | NM_006089    | 26.887257 | 0.217542492 | 0.68950794 | 5.71E-14 | 2.3E-09 | 1.7 | 4.2E-07 | Yes |
| 3498502 | TM9SF2    | NM_004800    | 44.162727 | 0.217061603 | 0.7353665  | 0        | --      | --  | --      |     |
| 3161167 | KIAA1432  | XM_039698    | 14.061445 | 0.216563458 | 0.75800562 | 0        | 2.3E-01 | 1.2 | 1.2E-04 |     |
| 3216969 | XPA       | NM_000380    | 11.54397  | 0.215659633 | 0.79585031 | 0        | 3.7E-01 | 1.4 | 1.1E-04 |     |
| 3909354 | ADNP      | NM_181442    | 10.290639 | 0.215078739 | 0.80445117 | 0        | --      | --  | --      | Yes |
| 3514488 | DDX26     | NM_012141    | 10.667194 | 0.214814702 | 0.79640415 | 0        | --      | --  | --      | Yes |
| 3430552 | PWP1      | NM_007062    | 18.85514  | 0.213574616 | 0.76082171 | 0        | --      | --  | --      | Yes |
| 3864921 | ZNF180    | NM_013256    | 12.436516 | 0.211612657 | 0.76614401 | 0        | 3.2E-02 | 1.2 | 5.4E-04 | Yes |
| 3273601 | IDI1      | NM_004508    | 18.756714 | 0.211092427 | 0.73740529 | 0        | --      | --  | --      |     |
| 3872521 | ZNF417    | NM_152475    | 16.140932 | 0.21090491  | 0.77387864 | 0        | --      | --  | --      | Yes |
| 4022833 | MOSPD1    | NM_019556    | 15.094017 | 0.209795731 | 0.7848409  | 0        | --      | --  | --      |     |
| 3214668 | IARS      | NM_013417    | 12.101158 | 0.209003298 | 0.75209728 | 0        | 8.2E-01 | 1.2 | 2.2E-03 | Yes |
| 3249788 | CCAR1     | NM_018237    | 13.959479 | 0.208211389 | 0.72616631 | 4.44E-16 | 5.9E-02 | 1.4 | 1.2E-04 |     |
| 3561110 | GARNL1    | NM_014990    | 15.385455 | 0.207679824 | 0.75891618 | 0        | 1.0E+00 | 1.1 | 2.3E-05 |     |
| 3236395 | HSPA14    | NM_016299    | 13.640973 | 0.207104733 | 0.77471045 | 0        | --      | --  | --      |     |
| 3386638 | SLC36A4   | NM_152313    | 15.268729 | 0.206346246 | 0.76099581 | 0        | --      | --  | --      |     |
| 4021508 | SUHW3     | NM_017666    | 13.939895 | 0.205122876 | 0.73394895 | 2.22E-16 | 1.2E-02 | 1.2 | 2.2E-03 | Yes |
| 3347615 | ACAT1     | NM_000019    | 20.932799 | 0.204828497 | 0.7195278  | 1.33E-15 | 4.6E-01 | 1.3 | 1.2E-06 |     |
| 2392267 | FLJ13941  | NM_024848    | 15.883472 | 0.201715116 | -0.7877116 | 3.27E-20 | 3.0E-14 | 1.5 | 8.0E-11 |     |
| 3169094 | WDR32     | NM_024345    | 11.207269 | 0.201455291 | 0.7840089  | 0        | --      | --  | --      |     |
| 3369890 | TRAF6     | NM_145803    | 15.73671  | 0.200614829 | 0.74501766 | 0        | 3.0E-08 | 1.2 | 1.5E-01 |     |
| 3872542 | ZNF418    | NM_133460    | 13.028757 | 0.197357004 | 0.75268859 | 0        | 1.7E-01 | 1.2 | 8.2E-05 | Yes |
| 3992148 | DDX26B    | NM_182540    | 9.7204627 | 0.197170952 | 0.78317805 | 0        | --      | --  | --      |     |
| 3152220 | KIAA0196  | NM_014846    | 9.5768543 | 0.197077547 | 0.77151011 | 0        | 5.8E-01 | 1.1 | 3.2E-04 |     |
| 3398241 | BTBD15    | NM_014155    | 18.721365 | 0.195350125 | 0.72776874 | 4.44E-16 | 3.6E-04 | 1.3 | 4.4E-01 | Yes |
| 3199790 | PSIP1     | NM_033222    | 9.7079722 | 0.195280268 | 0.74464298 | 0        | 1.7E-01 | 1.4 | 2.8E-10 | Yes |
| 3826504 | ZNF431    | NM_133473    | 10.168105 | 0.195175142 | 0.77650561 | 0        | 2.4E-03 | 1.5 | 1.5E-03 | Yes |
| 3766861 | POLG2     | NM_007215    | 10.723715 | 0.194861557 | 0.77383622 | 0        | --      | --  | --      | Yes |
| 3323443 | HRMT1L3   | NM_005788    | 17.993342 | 0.193955485 | 0.73194217 | 2.22E-16 | --      | --  | --      |     |
| 3513883 | KPNA3     | NM_002267    | 13.560062 | 0.192223603 | 0.67790693 | 2.15E-13 | --      | --  | --      |     |
| 3471819 | FLJ13089  | NM_024953    | 10.836111 | 0.191760337 | 0.7267018  | 4.44E-16 | --      | --  | --      |     |
| 3690550 | SIAH1     | NM_001006610 | 19.32272  | 0.191618976 | 0.74280348 | 0        | 5.6E-05 | 1.5 | 3.7E-02 |     |
| 3490741 | SUGT1     | NM_006704    | 11.27301  | 0.191356414 | 0.76073753 | 0        | --      | --  | --      |     |
| 3625234 | C15orf15  | NM_016304    | 11.055248 | 0.191330813 | 0.77676949 | 0        | --      | --  | --      | Yes |
| 3320301 | SH2BP1    | NM_014633    | 10.869562 | 0.190688925 | 0.72354552 | 8.88E-16 | 2.1E-01 | 1.2 | 5.8E-04 |     |
| 3444180 | KLRA1     | NM_006611    | 10.296944 | 0.190524759 | 0.79565538 | 0        | --      | --  | --      |     |
| 3840224 | ZNF528    | NM_032423    | 9.5724999 | 0.190433663 | 0.77687096 | 0        | 2.1E-01 | 1.4 | 8.3E-06 | Yes |
| 3202421 | C9orf72   | NM_018325    | 12.662334 | 0.190423738 | 0.76147891 | 0        | --      | --  | --      |     |
| 3719112 | TRIP3     | NM_004773    | 11.659323 | 0.189867319 | 0.70617944 | 7.55E-15 | --      | --  | --      |     |
| 3265047 | NHLRC2    | NM_198514    | 13.566098 | 0.189672958 | 0.71157929 | 3.77E-15 | --      | --  | --      |     |
| 3513096 | ESD       | NM_001984    | 13.458476 | 0.189646219 | 0.72747435 | 4.44E-16 | --      | --  | --      |     |
| 3974708 | USP9Y     | NM_004654    | 15.415438 | 0.189519965 | 0.64674511 | 5.74E-12 | --      | --  | --      |     |
| 3793588 | C18orf55  | NM_014177    | 24.837832 | 0.188835074 | 0.72483726 | 6.66E-16 | --      | --  | --      |     |
| 3136015 | FLJ32370  | NM_152417    | 11.897072 | 0.188636089 | 0.77980801 | 0        | --      | --  | --      |     |
| 3202171 | PLAA      | NM_004253    | 12.67756  | 0.187971217 | 0.76666394 | 0        | 9.5E-01 | 1.1 | 4.7E-04 |     |
| 3526151 | TUBGCP3   | NM_006322    | 10.639078 | 0.187787816 | 0.74615188 | 0        | 2.0E-01 | 1.3 | 1.3E-05 |     |
| 3633890 | ZNF291    | NM_020843    | 15.289109 | 0.187157823 | 0.70324264 | 1.09E-14 | 7.5E-02 | 1.2 | 2.9E-04 |     |
| 3797015 | ZFP161    | NM_003409    | 9.168646  | 0.186723074 | 0.76959992 | 0        | --      | --  | --      | Yes |
| 2399718 | AKR7A2    | NM_003689    | 11.484075 | 0.186208195 | -0.7399512 | 7.97E-17 | 9.6E-12 | 1.6 | 1.3E-01 |     |
| 3726992 | WDR50     | NM_016001    | 10.001157 | 0.185332436 | 0.78483727 | 0        | --      | --  | --      | Yes |
| 3292735 | SLC25A16  | NM_152707    | 14.330784 | 0.185326852 | 0.74050451 | 0        | --      | --  | --      |     |
| 3566304 | SEC10L1   | NM_006544    | 10.079799 | 0.184917307 | 0.74458719 | 0        | 1.0E+00 | 1.2 | 2.3E-05 |     |
| 3602526 | FBXO22    | NM_147188    | 9.6824986 | 0.184304619 | 0.7596259  | 0        | 1.0E+00 | 1.2 | 7.3E-05 |     |
| 3941907 | EWSR1     | NM_005243    | 9.5263892 | 0.184127861 | 0.775341   | 0        | 1.5E-04 | 1.4 | 1.0E+00 | Yes |
| 3363979 | PSMA1     | NM_148976    | 19.17646  | 0.184098023 | 0.63656034 | 1.55E-11 | --      | --  | --      |     |
| 3485786 | RFXAP     | NM_000538    | 9.7710771 | 0.183595023 | 0.75247234 | 0        | --      | --  | --      | Yes |
| 3897431 | MKKS      | NM_170784    | 28.087764 | 0.18353594  | 0.72760785 | 4.44E-16 | 7.2E-02 | 1.2 | 2.2E-05 |     |
| 3476265 | EIF2B1    | NM_001414    | 11.989059 | 0.18036459  | 0.73094985 | 4.44E-16 | 6.8E-04 | 1.3 | 7.2E-02 | Yes |
| 3449910 | LOC196394 | NM_207337    | 19.242376 | 0.179530037 | 0.70953353 | 4.88E-15 | --      | --  | --      |     |
| 3779817 | Cep192    | NM_032142    | 11.115678 | 0.178760303 | 0.75074698 | 0        | --      | --  | --      |     |
| 3560864 | C14orf10  | NM_017917    | 9.7131094 | 0.178459288 | 0.75944616 | 0        | --      | --  | --      | Yes |
| 3233547 | RBM17     | NM_032905    | 12.446651 | 0.178111322 | 0.71791238 | 1.78E-15 | --      | --  | --      | Yes |
| 3697799 | AP1G1     | NM_001128    | 9.9229271 | 0.17729982  | 0.72685398 | 4.44E-16 | --      | --  | --      |     |
| 3310725 | C10orf88  | NM_029492    | 9.6761589 | 0.177234358 | 0.76520454 | 0        | --      | --  | --      |     |
| 3570556 | MED6      | NM_005466    | 8.816936  | 0.175955777 | 0.78236422 | 0        | --      | --  | --      | Yes |
| 3182409 | ZNF189    | NM_003452    | 11.491066 | 0.175794557 | 0.77041132 | 0        | --      | --  | --      | Yes |
| 3538703 | MAD2L1    | NM_002358    | 8.7369306 | 0.174239415 | 0.76657201 | 0        | --      | --  | --      |     |
| 3178611 | SECISBP2  | NM_024077    | 16.778849 | 0.174086193 | 0.67338921 | 3.55E-13 | 1.4E-05 | 1.7 | 3.7E-02 | Yes |
| 3542207 | SFRS5     | NM_006925    | 9.9785966 | 0.173585939 | 0.71574272 | 2.22E-15 | 1.5E-01 | 1.4 | 4.1E-08 | Yes |
| 3747717 | COP3      | NM_003653    | 13.88318  | 0.17356351  | 0.67241883 | 3.95E-13 | --      | --  | --      |     |
| 3359751 | ZNF195    | NM_007152    | 13.355004 | 0.172883796 | 0.7105898  | 4.44E-15 | 1.4E-06 | 1.5 | 3.3E-05 | Yes |
| 3742067 | UBE2G1    | NM_003342    | 10.125732 | 0.171975966 | 0.74316885 | 0        | --      | --  | --      |     |
| 3228007 | ALS4      | NM_015046    | 10.164486 | 0.171890987 | 0.66995529 | 5.16E-13 | --      | --  | --      |     |
| 4017245 | FLJ11016  | NM_018301    | 9.1475439 | 0.171619561 | 0.75973015 | 0        | --      | --  | --      |     |
| 3763687 | COIL      | NM_004645    | 8.8636587 | 0.171423732 | 0.77990369 | 0        | --      | --  | --      |     |

|         |              |              |           |             |            |          |         |     |         |     |
|---------|--------------|--------------|-----------|-------------|------------|----------|---------|-----|---------|-----|
| 3843275 | ZNF548       | NM_152909    | 9.8508436 | 0.170654258 | 0.78408231 | 0        | --      | --  | --      | Yes |
| 3504434 | XPO4         | NM_022459    | 16.266693 | 0.169883596 | 0.72800677 | 4.44E-16 | --      | --  | --      |     |
| 3807474 | RPL17        | NM_000985    | 12.081024 | 0.169783541 | 0.68114787 | 1.49E-13 | --      | --  | --      | Yes |
| 3387033 | MRE11A       | NM_005590    | 12.7728   | 0.168830776 | 0.74005273 | 0        | 1.0E-01 | 1.1 | 3.0E-06 |     |
| 3659858 | FLJ38101     | NM_153261    | 8.8277793 | 0.166820553 | 0.75762489 | 0        | --      | --  | --      |     |
| 3752002 | CRLF3        | NM_015986    | 16.99194  | 0.165076789 | 0.69159859 | 4.46E-14 | 3.5E-04 | 1.5 | 6.0E-07 |     |
| 3732448 | FALZ         | NM_182641    | 8.9837414 | 0.164742024 | 0.6747211  | 3.06E-13 | 1.6E-02 | 1.2 | 1.4E-05 | Yes |
| 3319840 | IPO7         | NM_006391    | 8.2249977 | 0.163691954 | 0.75593837 | 0        | --      | --  | --      |     |
| 3364095 | CYP2R1       | NM_024514    | 12.192678 | 0.163676843 | 0.75605479 | 0        | 9.8E-03 | 1.3 | 3.8E-06 |     |
| 3408573 | LOC144363    | NM_001001660 | 12.120372 | 0.162988908 | 0.73541146 | 0        | --      | --  | --      |     |
| 3295032 | AP3M1        | NM_012095    | 14.013486 | 0.162775884 | 0.67479061 | 3.04E-13 | --      | --  | --      |     |
| 3142519 | ZFAND1       | NM_024699    | 17.461402 | 0.162569602 | 0.695802   | 2.71E-14 | --      | --  | --      |     |
| 3907652 | NCOA5        | NM_020967    | 13.697086 | 0.159911891 | 0.68964086 | 5.62E-14 | 9.9E-06 | 1.5 | 1.9E-03 | Yes |
| 3185063 | UGCG         | NM_003358    | 15.20843  | 0.159741798 | 0.71630098 | 2.22E-15 | --      | --  | --      |     |
| 3652218 | UQCRC2       | NM_003366    | 14.154581 | 0.159573583 | 0.66152988 | 1.27E-12 | --      | --  | --      |     |
| 3269662 | BCCIP        | NM_078468    | 19.652609 | 0.159228586 | 0.71344966 | 3.11E-15 | 2.8E-02 | 1.4 | 1.6E-04 |     |
| 3280902 | DNAJC1       | NM_022365    | 13.733714 | 0.158610994 | 0.6852636  | 9.33E-14 | 9.3E-04 | 1.5 | 3.8E-10 |     |
| 3593770 | AP4E1        | NM_007347    | 9.7145048 | 0.158105231 | 0.752604   | 0        | --      | --  | --      |     |
| 3573261 | SKIIP        | NM_012245    | 14.122101 | 0.157658609 | 0.67559656 | 2.78E-13 | 5.2E-02 | 1.3 | 4.1E-07 |     |
| 3833323 | ZNF546       | NM_178544    | 10.093088 | 0.157331023 | 0.76561684 | 0        | 1.3E-01 | 1.3 | 5.2E-04 | Yes |
| 3889766 | PFDN4        | NM_002623    | 10.050696 | 0.155895855 | 0.73761601 | 0        | --      | --  | --      |     |
| 3387171 | HSPC148      | NM_016403    | 9.5450192 | 0.155802873 | 0.71321756 | 3.11E-15 | --      | --  | --      | Yes |
| 3662612 | KIAA1972     | NM_133368    | 7.9399806 | 0.155588844 | 0.69261705 | 3.95E-14 | 1.8E-01 | 1.3 | 1.0E-04 |     |
| 3430776 | NIFUN        | NM_014301    | 12.523413 | 0.155311652 | 0.66221387 | 1.18E-12 | --      | --  | --      |     |
| 3407096 | PLEKHA5      | NM_019012    | 10.147317 | 0.153647734 | 0.73117995 | 4.44E-16 | --      | --  | --      |     |
| 3929721 | GART         | NM_000819    | 8.3886583 | 0.153375569 | 0.73194108 | 2.22E-16 | 1.1E-01 | 1.2 | 3.4E-04 | Yes |
| 3729294 | RPS6KB1      | NM_003161    | 11.108027 | 0.153302137 | 0.71601243 | 2.22E-15 | --      | --  | --      |     |
| 3391093 | ALG9         | NM_024740    | 13.195971 | 0.152096612 | 0.6651604  | 8.64E-13 | --      | --  | --      |     |
| 3406015 | ATF7IP       | NM_018179    | 7.3577775 | 0.151075128 | 0.70462472 | 9.33E-15 | --      | --  | --      | Yes |
| 3629494 | CLPX         | NM_006660    | 9.1381943 | 0.15075581  | 0.75072166 | 0        | --      | --  | --      |     |
| 3372459 | FNBP4        | NM_015308    | 12.083245 | 0.149052412 | 0.66200149 | 1.21E-12 | 2.4E-04 | 1.3 | 4.5E-01 |     |
| 3857105 | ZNF91        | NM_003430    | 7.7103711 | 0.148667776 | 0.6946824  | 3.11E-14 | --      | --  | --      | Yes |
| 3304012 | MGEA5        | NM_012215    | 13.31208  | 0.148462237 | 0.66448613 | 9.28E-13 | 3.6E-02 | 1.5 | 1.2E-03 |     |
| 3216529 | FLJ16636     | NM_001001662 | 8.068957  | 0.147285855 | 0.74130214 | 0        | --      | --  | --      | Yes |
| 3407229 | AEBP2        | NM_153207    | 15.521624 | 0.147239133 | 0.70928284 | 5.11E-15 | --      | --  | --      |     |
| 3827427 | ZNF254       | NM_004876    | 6.8986713 | 0.147053792 | 0.74549368 | 0        | --      | --  | --      | Yes |
| 3421523 | YEATS4       | NM_006530    | 11.965274 | 0.146681746 | 0.60222581 | 3.41E-10 | --      | --  | --      | Yes |
| 3829768 | UBA2         | NM_005499    | 12.279052 | 0.146171775 | 0.63860291 | 1.27E-11 | 4.7E-02 | 1.5 | 2.2E-03 |     |
| 3556418 | METTL3       | NM_019852    | 8.4521011 | 0.145538512 | 0.6962312  | 2.58E-14 | --      | --  | --      | Yes |
| 3559570 | HECTD1       | NM_015382    | 8.3001007 | 0.144806168 | 0.70916533 | 5.33E-15 | --      | --  | --      |     |
| 3856554 | ZNF100       | NM_173531    | 11.048229 | 0.144416861 | 0.75056796 | 0        | --      | --  | --      | Yes |
| 3760625 | CDC27        | NM_001256    | 8.2443479 | 0.143724297 | 0.68384395 | 1.10E-13 | --      | --  | --      |     |
| 3131844 | LSM1         | NM_014462    | 7.9970563 | 0.143357365 | 0.6393177  | 1.19E-11 | --      | --  | --      | Yes |
| 3729014 | GDPD1        | NM_182569    | 6.8627055 | 0.143111063 | 0.77499462 | 0        | 2.1E-01 | 1.3 | 3.9E-04 |     |
| 3396144 | FLJ23342     | NM_024631    | 7.0661337 | 0.142414061 | 0.73178513 | 2.22E-16 | --      | --  | --      |     |
| 3542689 | PCNX         | NM_014982    | 9.807159  | 0.142390789 | 0.71633415 | 2.22E-15 | --      | --  | --      |     |
| 3969455 | OFD1         | NM_003611    | 7.6547821 | 0.141586267 | 0.75324427 | 0        | --      | --  | --      |     |
| 3535674 | C14orf166    | NM_016039    | 8.8879274 | 0.141212302 | 0.71262963 | 3.33E-15 | --      | --  | --      |     |
| 3869339 | ZNF350       | NM_021632    | 20.243268 | 0.141139917 | 0.69184208 | 4.35E-14 | 4.0E-03 | 1.3 | 2.0E-03 | Yes |
| 3570454 | C14orf112    | NM_016468    | 13.16983  | 0.140968327 | 0.65564968 | 2.33E-12 | --      | --  | --      |     |
| 3201277 | KLHL9        | NM_018847    | 7.7288022 | 0.140937995 | 0.75477747 | 0        | --      | --  | --      |     |
| 3500772 | C13orf6      | NM_032859    | 9.3374163 | 0.140182384 | 0.72792497 | 4.44E-16 | --      | --  | --      |     |
| 3790259 | MALT1        | NM_173844    | 7.721626  | 0.138730938 | 0.7550539  | 0        | --      | --  | --      |     |
| 3452970 | SENP1        | NM_014554    | 11.654294 | 0.138724783 | 0.64941392 | 4.40E-12 | 4.5E-02 | 1.1 | 2.9E-07 |     |
| 3831588 | ZNF345       | NM_003419    | 7.9763333 | 0.138554177 | 0.71364451 | 2.89E-15 | 2.6E-03 | 1.2 | 2.2E-04 | Yes |
| 3877776 | SNRPB2       | NM_198220    | 8.7434892 | 0.138458152 | 0.72375752 | 8.88E-16 | --      | --  | --      | Yes |
| 3883547 | PHF20        | NM_016436    | 7.9389146 | 0.137558203 | 0.68548243 | 9.10E-14 | --      | --  | --      | Yes |
| 3488094 | GTF2F2       | NM_004128    | 9.0689107 | 0.137123485 | 0.70611659 | 7.55E-15 | --      | --  | --      | Yes |
| 3860596 | GIOT-1       | NM_153257    | 10.140715 | 0.136907186 | 0.70685392 | 7.11E-15 | --      | --  | --      | Yes |
| 3483348 | C13orf12     | NM_015932    | 12.316126 | 0.13631054  | 0.56048942 | 9.21E-09 | --      | --  | --      |     |
| 3419807 | XPOT         | NM_007235    | 8.1829667 | 0.135826232 | 0.73647249 | 0        | 9.0E-01 | 1.2 | 5.7E-04 |     |
| 3396736 | PUS3         | NM_031307    | 7.2521943 | 0.135752721 | 0.71362738 | 2.89E-15 | --      | --  | --      | Yes |
| 3698055 | TXNL4B       | NM_017853    | 11.398203 | 0.134951752 | 0.68868816 | 6.28E-14 | --      | --  | --      | Yes |
| 3409330 | MRPS35       | NM_021821    | 8.3590152 | 0.134188646 | 0.69144411 | 4.53E-14 | --      | --  | --      |     |
| 3807370 | DYM          | NM_017653    | 7.4961612 | 0.133980519 | 0.73063824 | 4.44E-16 | 3.0E-01 | 1.4 | 8.2E-04 |     |
| 3416483 | LOC389674    | XM_372050    | 8.6147909 | 0.133043414 | 0.7372687  | 0        | 1.5E-06 | 1.4 | 1.1E-07 |     |
| 3326183 | M11S1        | NM_203364    | 7.1839045 | 0.131544207 | 0.71347984 | 3.11E-15 | 1.9E-02 | 1.2 | 8.2E-04 |     |
| 3365360 | HPS5         | NM_007216    | 8.4955799 | 0.131359978 | 0.70727862 | 6.66E-15 | --      | --  | --      |     |
| 3512449 | NUFIP1       | NM_012345    | 7.2602955 | 0.130723722 | 0.7698777  | 0        | --      | --  | --      | Yes |
| 3821479 | ZNF439       | NM_152262    | 10.219506 | 0.129707657 | 0.70426731 | 9.77E-15 | --      | --  | --      | Yes |
| 3446868 | LDHB         | NM_002300    | 13.978639 | 0.129489942 | 0.58821963 | 1.09E-09 | --      | --  | --      |     |
| 3469865 | CRY1         | NM_004075    | 12.275099 | 0.129209544 | 0.68857937 | 6.35E-14 | --      | --  | --      | Yes |
| 3366519 | FANCF        | NM_022725    | 6.7850099 | 0.129189813 | 0.74511291 | 0        | --      | --  | --      |     |
| 3205586 | EXOSC3       | NM_016042    | 7.839101  | 0.128683776 | 0.7308779  | 4.44E-16 | --      | --  | --      | Yes |
| 3143643 | DKFZp761D112 | AL136588     | 12.903282 | 0.127556234 | 0.65151928 | 3.56E-12 | --      | --  | --      |     |
| 3594129 | MAPK6        | NM_002748    | 6.1351853 | 0.127551133 | 0.74017623 | 0        | --      | --  | --      |     |
| 3839818 | ZNF175       | NM_007147    | 9.0046228 | 0.127534644 | 0.70543068 | 8.44E-15 | 9.5E-04 | 1.3 | 4.8E-02 | Yes |
| 3015603 | LOC442715    | XM_499461    | 17.669328 | 0.127463337 | -0.7051781 | 8.59E-15 | 6.4E-22 | 1.5 | 1.6E-23 |     |
| 3388914 | MGC2714      | NM_032299    | 8.1953676 | 0.125616563 | 0.70375305 | 1.02E-14 | --      | --  | --      |     |
| 3840142 | ZNF480       | BC054018     | 6.7470422 | 0.125076565 | 0.68727624 | 7.42E-14 | --      | --  | --      | Yes |
| 3597977 | TRIP4        | NM_016213    | 8.4508553 | 0.124153772 | 0.70448643 | 9.33E-15 | --      | --  | --      | Yes |
| 3870054 | ZNF160       | NM_198893    | 6.5283273 | 0.124118375 | 0.71089413 | 4.22E-15 | --      | --  | --      | Yes |
| 3767339 | GNA13        | NM_006572    | 7.4626052 | 0.124083746 | 0.70682446 | 7.11E-15 | --      | --  | --      |     |
| 3576545 | KIAA2010     | NM_032560    | 5.7309948 | 0.120562489 | 0.74670423 | 0        | --      | --  | --      |     |

|         |           |              |           |             |            |          |         |     |         |     |
|---------|-----------|--------------|-----------|-------------|------------|----------|---------|-----|---------|-----|
| 3434393 | LOC390498 | XM_497418    | 20.082208 | 0.118789007 | 0.63577617 | 1.67E-11 | --      | --  | --      |     |
| 3507962 | KATNAL1   | NM_032116    | 10.329731 | 0.116961393 | 0.64446846 | 7.19E-12 | --      | --  | --      |     |
| 3580947 | C14orf2   | NM_004894    | 8.1402435 | 0.116851406 | 0.55963069 | 9.81E-09 | --      | --  | --      |     |
| 3458133 | PRIM1     | NM_000946    | 14.120868 | 0.116075362 | 0.62681142 | 3.87E-11 | 2.6E-06 | 1.8 | 4.0E-13 | Yes |
| 3219682 | C9orf5    | NM_032012    | 9.9741985 | 0.116037102 | 0.64794731 | 5.09E-12 | 3.3E-01 | 1.3 | 1.9E-05 |     |
| 3750595 | IFT20     | NM_174887    | 9.1156539 | 0.115244793 | 0.62203619 | 5.99E-11 | --      | --  | --      |     |
| 3819968 | ZNF177    | NM_003451    | 7.1820849 | 0.114461336 | 0.71014802 | 4.44E-15 | 5.5E-01 | 1.1 | 2.0E-04 | Yes |
| 3877221 | C20orf7   | NM_024120    | 7.2680266 | 0.114445361 | 0.71689787 | 1.78E-15 | --      | --  | --      |     |
| 3563372 | C14orf104 | NM_018139    | 6.409345  | 0.114279658 | 0.72907506 | 4.44E-16 | --      | --  | --      |     |
| 3659931 | PAPD5     | NM_022447    | 14.916252 | 0.114095517 | 0.60971553 | 1.79E-10 | --      | --  | --      |     |
| 3635776 | LOC440298 | XM_496086    | 6.99113   | 0.114082122 | 0.72799689 | 4.44E-16 | --      | --  | --      |     |
| 3286393 | ZNF32     | NM_001005368 | 7.45551   | 0.113887381 | 0.64108221 | 1.00E-11 | --      | --  | --      | Yes |
| 3538555 | PPM1A     | NM_021003    | 6.0604985 | 0.113807022 | 0.683601   | 1.13E-13 | 8.9E-02 | 1.3 | 6.8E-04 |     |
| 3143660 | MMP16     | NM_005941    | 16.357517 | 0.113603608 | 0.65555585 | 2.36E-12 | 1.0E-10 | 1.7 | 5.3E-14 |     |
| 3831620 | ZNF568    | NM_198539    | 5.4884527 | 0.11346261  | 0.73215716 | 2.22E-16 | --      | --  | --      | Yes |
| 3352503 | ARHGEF12  | NM_015313    | 11.982116 | 0.113224238 | 0.56381165 | 7.20E-09 | 1.0E-01 | 1.4 | 2.4E-12 |     |
| 3169043 | RG9MTD3   | NM_144964    | 6.0715131 | 0.112480069 | 0.74721847 | 0        | --      | --  | --      |     |
| 3855985 | ZNF14     | NM_021030    | 5.5346192 | 0.112157033 | 0.72948858 | 4.44E-16 | --      | --  | --      | Yes |
| 3544905 | C14orf118 | NM_017972    | 6.3862432 | 0.112074616 | 0.7050034  | 8.88E-15 | --      | --  | --      |     |
| 3831917 | ZNF570    | NM_144694    | 7.4405082 | 0.111196185 | 0.67938837 | 1.82E-13 | --      | --  | --      | Yes |
| 3327166 | LOC119710 | NM_138787    | 6.380055  | 0.110680753 | 0.70887117 | 5.33E-15 | --      | --  | --      |     |
| 4016193 | TMSL8     | NM_021992    | 8.4843335 | 0.110569979 | 0.68313115 | 1.19E-13 | --      | --  | --      |     |
| 3764872 | BIT1      | NM_016077    | 7.9181172 | 0.110563421 | 0.73382832 | 2.22E-16 | --      | --  | --      |     |
| 3145586 | MTERFD1   | NM_015942    | 6.080143  | 0.110382016 | 0.72319105 | 8.88E-16 | --      | --  | --      |     |
| 3989089 | ZBTB33    | NM_006777    | 5.6026575 | 0.109746635 | 0.71584578 | 2.22E-15 | --      | --  | --      | Yes |
| 3591281 | SPCS2P    | XM_170777    | 7.7599398 | 0.109720851 | 0.70167382 | 1.33E-14 | --      | --  | --      |     |
| 3256074 | LOC283155 | XM_208545    | 6.2068716 | 0.109703635 | 0.70703479 | 6.66E-15 | 1.7E-04 | 1.5 | 4.6E-07 |     |
| 4022781 | LOC159090 | NM_145284    | 6.374583  | 0.109171332 | 0.70884329 | 5.33E-15 | --      | --  | --      |     |
| 3928070 | CCT8      | NM_006585    | 5.2944798 | 0.108525637 | 0.74002761 | 0        | --      | --  | --      |     |
| 3149754 | EIF3S3    | NM_003756    | 10.540219 | 0.107976055 | 0.5904898  | 9.03E-10 | --      | --  | --      | Yes |
| 3343202 | EED       | NM_003797    | 5.8155904 | 0.107468161 | 0.7121492  | 3.55E-15 | 1.6E-01 | 1.4 | 1.2E-05 | Yes |
| 3564997 | DDHD1     | NM_030637    | 9.3003535 | 0.106892443 | 0.64446754 | 7.19E-12 | --      | --  | --      |     |
| 3439356 | ZNF140    | NM_003440    | 6.1298761 | 0.106818402 | 0.69085167 | 4.88E-14 | --      | --  | --      | Yes |
| 3347831 | DDX10     | NM_004398    | 5.9416901 | 0.10677979  | 0.69201892 | 4.26E-14 | 5.0E-01 | 1.2 | 1.6E-03 |     |
| 3506936 | MTIF3     | NM_152912    | 5.4259875 | 0.106119497 | 0.75293425 | 0        | --      | --  | --      | Yes |
| 3598721 | ZWILCH    | NM_017975    | 8.0428152 | 0.105237211 | 0.67129076 | 4.47E-13 | --      | --  | --      |     |
| 3843156 | ZNF272    | NM_006635    | 5.0745202 | 0.103885491 | 0.66772575 | 6.57E-13 | --      | --  | --      | Yes |
| 3842675 | ZNF542    | NM_194319    | 5.8387517 | 0.103696863 | 0.72078397 | 1.11E-15 | 4.7E-01 | 1.2 | 1.7E-04 | Yes |
| 3996815 | VBP1      | NM_003372    | 8.8961479 | 0.103644881 | 0.61985922 | 7.30E-11 | --      | --  | --      |     |
| 3956290 | PITPNB    | NM_012399    | 5.3607661 | 0.101648227 | 0.73404933 | 2.22E-16 | --      | --  | --      |     |
| 3354731 | EI24      | NM_001007277 | 9.7873971 | 0.098431172 | 0.61346613 | 1.29E-10 | 1.7E-01 | 1.4 | 9.7E-04 |     |
| 3835339 | ZNF155    | NM_003445    | 5.9108163 | 0.097925709 | 0.70842643 | 5.77E-15 | 1.4E-03 | 1.5 | 1.9E-01 | Yes |
| 3556323 | SUPT16H   | NM_007192    | 5.889454  | 0.097612093 | 0.64606485 | 6.14E-12 | --      | --  | --      | Yes |
| 3864725 | ZNF45     | NM_003425    | 5.1957385 | 0.097288749 | 0.73712012 | 0        | --      | --  | --      | Yes |
| 3929395 | C21orf66  | NM_016631    | 5.6806627 | 0.097092112 | 0.6331345  | 2.14E-11 | --      | --  | --      | Yes |
| 3562721 | FKBP3     | NM_002013    | 6.3003854 | 0.09708678  | 0.62069829 | 6.77E-11 | --      | --  | --      |     |
| 3151401 | DERL1     | NM_024295    | 11.803244 | 0.097021131 | 0.64794877 | 5.09E-12 | --      | --  | --      |     |
| 3849549 | ZNF121    | NM_001008727 | 5.7840295 | 0.096896572 | 0.64567593 | 6.38E-12 | --      | --  | --      | Yes |
| 3821301 | LOC441837 | XM_497606    | 5.7834162 | 0.096865648 | 0.69667257 | 2.44E-14 | 1.0E-03 | 1.6 | 1.9E-03 |     |
| 3518496 | MYCBP2    | NM_015057    | 17.747104 | 0.095560217 | 0.53097545 | 7.30E-08 | 5.4E-02 | 1.5 | 1.9E-06 | Yes |
| 3209623 | ZA20D2    | NM_006007    | 7.0547129 | 0.095221062 | 0.6866557  | 7.95E-14 | 5.4E-05 | 1.4 | 4.8E-03 |     |
| 3702352 | HSDL1     | NM_031463    | 5.3243902 | 0.095195319 | 0.68998547 | 5.40E-14 | --      | --  | --      |     |
| 3322958 | ZDHHC13   | NM_001001483 | 8.1254015 | 0.095030857 | 0.6892382  | 5.91E-14 | --      | --  | --      |     |
| 3806711 | IER3IP1   | NM_016097    | 6.519412  | 0.094933324 | 0.64674046 | 5.74E-12 | --      | --  | --      |     |
| 3327906 | API5      | NM_006595    | 5.4474467 | 0.094916991 | 0.6949488  | 3.00E-14 | --      | --  | --      |     |
| 3136413 | IMPA3     | NM_017813    | 5.4820885 | 0.094170283 | 0.7167846  | 2.00E-15 | --      | --  | --      |     |
| 3717452 | LRRC37B   | NM_052888    | 5.3119578 | 0.094130446 | 0.72325375 | 8.88E-16 | --      | --  | --      |     |
| 3781124 | MIB1      | NM_020774    | 5.1288682 | 0.093662348 | 0.65350259 | 2.91E-12 | --      | --  | --      |     |
| 4013224 | ATRX      | NM_138271    | 6.8547729 | 0.093242116 | 0.67527986 | 2.88E-13 | --      | --  | --      | Yes |
| 3396179 |           | --           | 5.2285868 | 0.093064958 | 0.65797212 | 1.84E-12 | --      | --  | --      |     |
| 3250204 | SUPV3L1   | NM_003171    | 7.5200017 | 0.093023783 | 0.6232688  | 5.36E-11 | --      | --  | --      |     |
| 3464000 | HSPC128   | NM_014167    | 5.2252971 | 0.09269496  | 0.71961343 | 1.33E-15 | --      | --  | --      |     |
| 3843399 | ZNF134    | NM_003435    | 5.6952262 | 0.091965792 | 0.69965132 | 1.69E-14 | --      | --  | --      | Yes |
| 3984907 | ARMCX1    | NM_016608    | 6.5331781 | 0.090899095 | 0.63769649 | 1.39E-11 | 7.1E-02 | 1.1 | 8.8E-05 |     |
| 3454296 | LASS5     | NM_147190    | 5.1988477 | 0.090316168 | 0.66826679 | 6.20E-13 | --      | --  | --      | Yes |
| 3484768 | APRIN     | NM_015928    | 5.1781081 | 0.090170624 | 0.69052405 | 5.06E-14 | 1.5E-01 | 1.4 | 3.8E-07 |     |
| 3352813 | LRRC35    | NM_152715    | 5.2491571 | 0.089342649 | 0.66085115 | 1.36E-12 | --      | --  | --      |     |
| 4016308 | BEX1      | NM_018476    | 8.3561208 | 0.089300795 | 0.56520172 | 6.49E-09 | --      | --  | --      |     |
| 3925439 | STCH      | NM_006948    | 6.4469624 | 0.089070942 | 0.65311237 | 3.03E-12 | --      | --  | --      |     |
| 3503976 | PSPC1     | NM_018282    | 4.1636465 | 0.088280566 | 0.68177451 | 1.39E-13 | 2.1E-01 | 1.2 | 1.8E-06 | Yes |
| 3707715 | RIP       | NM_032308    | 8.848738  | 0.087225898 | 0.58371972 | 1.56E-09 | --      | --  | --      |     |
| 3477917 | SLC15A4   | NM_145648    | 6.4915422 | 0.085535851 | 0.68962826 | 5.64E-14 | --      | --  | --      |     |
| 3727962 | DGKE      | NM_003647    | 8.998889  | 0.084910797 | 0.62715042 | 3.75E-11 | 1.1E-01 | 1.2 | 7.9E-04 |     |
| 3861064 | ZNF573    | NM_152360    | 4.4672433 | 0.084694245 | 0.72060041 | 1.33E-15 | --      | --  | --      | Yes |
| 3806525 | PIAS2     | NM_173206    | 4.5512663 | 0.084441278 | 0.70673788 | 7.11E-15 | --      | --  | --      | Yes |
| 3189110 | GAPVD1    | NM_015635    | 4.8634078 | 0.083882114 | 0.63137148 | 2.53E-11 | 6.5E-01 | 1.1 | 1.5E-03 |     |
| 3309345 | SFXN4     | NM_178867    | 5.4287084 | 0.08385284  | 0.65152832 | 3.55E-12 | --      | --  | --      |     |
| 3851493 | ZNF443    | NM_005815    | 4.2239862 | 0.083265887 | 0.7103255  | 4.44E-15 | --      | --  | --      | Yes |
| 4013018 | ZDHHC15   | NM_144969    | 4.6476906 | 0.083262921 | 0.67458759 | 3.11E-13 | --      | --  | --      |     |
| 3534866 | MGAT2     | NM_001015883 | 4.623048  | 0.08255162  | 0.69721941 | 2.29E-14 | --      | --  | --      |     |
| 3301011 | NOC3L     | NM_022451    | 4.8179639 | 0.082406622 | 0.64127447 | 9.82E-12 | --      | --  | --      |     |
| 3125775 | CNOT7     | NM_013354    | 5.0682855 | 0.081692259 | 0.69428438 | 3.24E-14 | --      | --  | --      | Yes |
| 3475587 | RSN       | NM_198240    | 6.3442255 | 0.079742805 | 0.55790309 | 1.11E-08 | 2.6E-01 | 1.2 | 3.3E-08 | Yes |
| 3468103 | MGC4170   | NM_024312    | 11.294768 | 0.078118165 | 0.53099921 | 7.28E-08 | 9.8E-05 | 1.7 | 8.5E-04 |     |

|         |           |              |           |             |            |           |         |     |         |     |
|---------|-----------|--------------|-----------|-------------|------------|-----------|---------|-----|---------|-----|
| 3864808 | ZNF235    | NM_004234    | 4.7229433 | 0.078110511 | 0.72412306 | 8.88E-16  | --      | --  | --      | Yes |
| 3685306 | NDUFAB1   | BC058920     | 4.7209831 | 0.077989146 | 0.5331966  | 6.29E-08  | --      | --  | --      |     |
| 2711957 | C3orf21   | NM_152531    | 5.41863   | 0.076721854 | -0.6888823 | 6.14E-14  | --      | --  | --      |     |
| 3651018 | CP110     | NM_014711    | 7.592289  | 0.076460123 | 0.61529729 | 1.10E-10  | --      | --  | --      |     |
| 4009604 | WNK3      | NM_001002838 | 5.9019149 | 0.075514751 | 0.51321675 | 2.31E-07  | 7.7E-02 | 1.3 | 1.7E-03 |     |
| 3790479 | SEC11L3   | NM_033280    | 16.742067 | 0.075301249 | 0.47512693 | 2.22E-06  | --      | --  | --      |     |
| 3549264 | KIAA1409  | NM_020818    | 4.3720703 | 0.073585676 | 0.65260638 | 3.19E-12  | 3.4E-01 | 1.1 | 8.9E-04 |     |
| 3907934 | ZNF334    | NM_199441    | 3.9558575 | 0.071375059 | 0.6549664  | 2.50E-12  | --      | --  | --      | Yes |
| 3724698 | NPEPPS    | NM_006310    | 5.0629596 | 0.070929685 | 0.58822523 | 1.08E-09  | 3.5E-04 | 1.5 | 1.8E-02 |     |
| 3808096 | RKHD2     | NM_016626    | 4.136122  | 0.070226128 | 0.61584707 | 1.05E-10  | --      | --  | --      |     |
| 3293280 | PP        | NM_021129    | 4.0840526 | 0.069836162 | 0.64635352 | 5.96E-12  | --      | --  | --      |     |
| 4019967 | C1GALT1C1 | NM_001011551 | 4.7343874 | 0.069575854 | 0.6896038  | 5.64E-14  | --      | --  | --      |     |
| 3742756 | DERL2     | NM_016041    | 5.4094122 | 0.067979639 | 0.5654232  | 6.38E-09  | --      | --  | --      |     |
| 3708826 | LOC341784 | XM_497370    | 3.1681373 | 0.065489599 | 0.68858924 | 6.35E-14  | 2.9E-04 | 1.3 | 5.8E-02 |     |
| 3872310 | ZNF550    | NM_153231    | 4.0931484 | 0.065338579 | 0.64271269 | 8.54E-12  | 1.1E-09 | 1.6 | 2.3E-01 | Yes |
| 3265432 | LOC402694 | XM_380042    | 4.3135702 | 0.064372847 | 0.60403386 | 2.92E-10  | --      | --  | --      |     |
| 3439063 | ZNF26     | NM_019591    | 3.0969584 | 0.064350545 | 0.68772864 | 7.02E-14  | --      | --  | --      | Yes |
| 3504691 | LOC387905 | XM_373559    | 3.42502   | 0.063734487 | 0.66844065 | 6.08E-13  | 6.5E-02 | 1.5 | 4.1E-06 |     |
| 3929775 | DONSON    | NM_017613    | 2.9971    | 0.063695835 | 0.6760231  | 2.65E-13  | --      | --  | --      |     |
| 3751830 | BLMH      | NM_000386    | 6.5371637 | 0.063600566 | 0.53754402 | 4.68E-08  | 1.1E-02 | 1.2 | 3.5E-05 |     |
| 3771800 | SFRS2     | NM_003016    | 3.5240988 | 0.061045034 | 0.59302493 | 7.34E-10  | 2.4E-03 | 1.6 | 3.5E-05 | Yes |
| 3489644 | RFP2      | NM_1213590   | 6.9437408 | 0.061026859 | 0.59804214 | 4.84E-10  | 2.6E-04 | 1.5 | 6.9E-14 |     |
| 3706219 | LOC440396 | XM_496177    | 5.5157804 | 0.060597388 | 0.59093433 | 8.71E-10  | --      | --  | --      |     |
| 3235461 | C10orf7   | NM_006023    | 3.7502668 | 0.059933206 | 0.58372819 | 1.56E-09  | --      | --  | --      |     |
| 3562086 | FBXO33    | NM_203301    | 3.5182988 | 0.059893832 | 0.68863364 | 6.31E-14  | --      | --  | --      |     |
| 3460593 | CGI-119   | NM_016056    | 4.2174564 | 0.059621726 | 0.55054368 | 1.89E-08  | --      | --  | --      |     |
| 3769969 | FLJ14775  | NM_032837    | 5.4512878 | 0.05922225  | 0.58515347 | 1.39E-09  | 9.7E-06 | 1.4 | 3.4E-03 |     |
| 3638068 | DET1      | NM_017996    | 4.8631144 | 0.058657107 | 0.58469381 | 1.44E-09  | --      | --  | --      |     |
| 2890326 | KIAA0676  | NM_015043    | 2.9456695 | 0.058177792 | -0.6667573 | 7.29E-13  | --      | --  | --      |     |
| 3878934 | NAT5      | NM_016100    | 3.9536092 | 0.0562111   | 0.59822252 | 4.77E-10  | --      | --  | --      |     |
| 3599162 | MAP2K5    | NM_145161    | 2.9717543 | 0.05605537  | 0.63988264 | 1.12E-11  | --      | --  | --      |     |
| 3217487 | ALG2      | NM_197973    | 2.7203011 | 0.055542349 | 0.67725681 | 2.31E-13  | --      | --  | --      |     |
| 3941643 | FLJ33814  | NM_173510    | 4.8859793 | 0.055499219 | 0.64399623 | 7.53E-12  | --      | --  | --      |     |
| 3325768 | FLJ21924  | NM_024774    | 3.0197569 | 0.054077324 | 0.5857768  | 1.32E-09  | 3.9E-02 | 1.4 | 3.0E-10 |     |
| 3719702 | MRPL45    | NM_032351    | 3.3066092 | 0.053721836 | 0.56308194 | 7.60E-09  | 3.0E-01 | 1.2 | 1.8E-05 | Yes |
| 3730899 | DDX42     | NM_203499    | 2.8888664 | 0.048295216 | 0.58441274 | 1.47E-09  | --      | --  | --      |     |
| 3645836 | ZNF75A    | NM_153028    | 3.6012001 | 0.047819284 | 0.62137884 | 6.36E-11  | --      | --  | --      | Yes |
| 3533397 | SIP1      | NM_001009183 | 3.0011354 | 0.047466145 | 0.56262389 | 7.86E-09  | --      | --  | --      | Yes |
| 3384471 | MDS025    | NM_021825    | 4.3479783 | 0.046576398 | 0.51761277 | 1.75E-07  | --      | --  | --      |     |
| 3428671 | CHPT1     | NM_020244    | 3.1003971 | 0.046345478 | 0.61758133 | 8.96E-11  | 6.6E-01 | 1.2 | 5.3E-05 |     |
| 3369249 | MMRP19    | NM_015957    | 4.0050867 | 0.046226727 | 0.55264773 | 1.63E-08  | --      | --  | --      |     |
| 3627042 | GTF2A2    | NM_004492    | 3.849061  | 0.045649667 | 0.52249177 | 1.28E-07  | --      | --  | --      | Yes |
| 3351775 | TRAPPC4   | NM_016146    | 3.8793936 | 0.044150957 | 0.54335837 | 3.14E-08  | --      | --  | --      |     |
| 3451318 | MADP-1    | NM_033114    | 2.722813  | 0.040167045 | 0.51975013 | 1.52E-07  | --      | --  | --      |     |
| 2385797 | KIAA1804  | NM_032435    | 4.5513976 | 0.039004404 | -0.5488269 | 2.14E-08  | 1.3E-16 | 1.5 | 3.4E-03 |     |
| 3826079 | ZNF66     | NM_001009883 | 1.9357193 | 0.036804928 | 0.55626754 | 1.25E-08  | 4.4E-01 | 1.3 | 1.4E-03 | Yes |
| 3518169 | COMMD6    | NM_203495    | 2.4281868 | 0.036526182 | 0.47481499 | 2.26E-06  | 1.0E+00 | 1.3 | 3.0E-08 |     |
| 3617458 | GM88      | NM_015003    | 3.8093647 | 0.035811848 | 0.49931121 | 5.46E-07  | --      | --  | --      |     |
| 3954525 | SUHW2     | NM_080764    | 2.2170038 | 0.031727004 | 0.55663906 | 1.22E-08  | --      | --  | --      | Yes |
| 3138978 | COP5      | NM_006837    | 2.0207451 | 0.028677045 | 0.53289309 | 6.42E-08  | --      | --  | --      | Yes |
| 3210179 | C9orf95   | NM_017881    | 4.279596  | 0.023090087 | 0.49585242 | 6.71E-07  | --      | --  | --      |     |
| 3945056 | EIF3S6IP  | NM_016091    | 3.5948161 | 0.02213511  | 0.39502727 | 0.0001166 | 1.2E-04 | 1.4 | 2.8E-04 | Yes |
| 3302328 | EXOSC1    | NM_016046    | 2.3702114 | 0.018123589 | 0.42305172 | 3.27E-05  | 2.0E-01 | 1.4 | 9.5E-07 | Yes |
| 4015884 | ARMCX2    | NM_177949    | 3.1026713 | 0.016292515 | 0.42240932 | 3.37E-05  | 3.2E-06 | 1.7 | 5.0E-04 |     |
